# Supplementary material
Source: publisher figshare collection journal article supplement (https://frontiersin.figshare.com/ndownloader/files/25724039)
Supplement: Supplementary file 1 [file 25724039]

## Sheet: Plant fossil occurrence data
record.id	loc.id	point.id	coll.id	reference.author	reference.year	genus.qualifier	genus	species	species.qualifier	taxon.author	figure	frequency	literature	comment	genus.qualifier.new	genus.new	species.new	species.qualifier.new	taxon.author.new	family	order	division	group	country	region	locality	latitude	longitude	level	reference.point	tectonic_unit	tectonic_domain	recon_age	palaeolongitude	palaeolatitude	palaeoregion	formation	member.part	sample.depth.height	stratigraphy	biostratigraphy	stage	latitudinal.slice	nr.voting.entries	max.vote	biome.calculated	biome.manual	retained	biome.retained
2	774	290	2	Abu Hamad et al.	2008		Botrychiopsis		sp.					Wagner 1962; Archangelsky and Wagner 1983		Botrychiopsis		sp.		incertae sedis	Corystospermales	Pteridospermatophyta	Corystospermales	Turkey	Diyarbakir	Hazro	38.2538	40.7808	Locality	Hazro	Ar Rayn	Arabia	250	7.16	-7.224	Turkey				uppermost Changhsingian		Changhsingian	0-10°N	16	0.445833	tropical_everwet	tropical_everwet	calculated	tropical_everwet
6	774	290	2	Abu Hamad et al.	2008		Cladophlebis	tenuicostata		(Halle) Archangelsky et Wagner				Wagner 1962; Archangelsky and Wagner 1983		Cladophlebis	tenuicostata		(Halle, 1927) Archangelsky et Wagner	Osmundaceae	Osmundales	Pteridophyta	Osmundales	Turkey	Diyarbakir	Hazro	38.2538	40.7808	Locality	Hazro	Ar Rayn	Arabia	250	7.16	-7.224	Turkey				uppermost Changhsingian		Changhsingian	0-10°N	16	0.445833	tropical_everwet	tropical_everwet	calculated	tropical_everwet
37	774	290	2	Abu Hamad et al.	2008		Fascipteris	hallei		(Kawasaki) Gu et Zhi				Wagner 1962; Archangelsky and Wagner 1983		Fascipteris	hallei		(Kawasaki, 1931) Gu et Zhi, 1974	incertae sedis	Marattiales	Pteridophyta	Marattiales	Turkey	Diyarbakir	Hazro	38.2538	40.7808	Locality	Hazro	Ar Rayn	Arabia	250	7.16	-7.224	Turkey				uppermost Changhsingian		Changhsingian	0-10°N	16	0.445833	tropical_everwet	tropical_everwet	calculated	tropical_everwet
38	774	290	2	Abu Hamad et al.	2008		Bicoemplectopteris	hallei		Asama				Wagner 1962; Archangelsky and Wagner 1983		Gigantonoclea	hallei		(Asama, 1959) Gu et Zhi, 1974	incertae sedis	Gigantopteridales	Gymnospermae	Gigantopteridales	Turkey	Diyarbakir	Hazro	38.2538	40.7808	Locality	Hazro	Ar Rayn	Arabia	250	7.16	-7.224	Turkey				uppermost Changhsingian		Changhsingian	0-10°N	16	0.445833	tropical_everwet	tropical_everwet	calculated	tropical_everwet
43	774	290	2	Abu Hamad et al.	2008		Glossopteris	anatolica		Archangelsky				Wagner 1962; Archangelsky and Wagner 1983		Glossopteris	anatolica		Archangelsky et Wagner, 1983	Glossopteridaceae	Glossopteridales	Pteridospermatophyta	Glossopteridales	Turkey	Diyarbakir	Hazro	38.2538	40.7808	Locality	Hazro	Ar Rayn	Arabia	250	7.16	-7.224	Turkey				uppermost Changhsingian		Changhsingian	0-10°N	16	0.445833	tropical_everwet	tropical_everwet	calculated	tropical_everwet
55	774	290	2	Abu Hamad et al.	2008		Lobatannularia	heianensis		(Kodaira) Kawasaki			Archangelsky S Wagner RH 1983 Glossopteris anatolica sp. nov From uppermost Permian strata in South-East Turkey Bull Brit Mus Nat Hist Geol Ser 37 81–91	Wagner 1962; Archangelsky and Wagner 1983		Lobatannularia	heianensis		(Kodaira, 1924) Kawasaki, 1927	Calamitaceae	Equisetales	Sphenophyta	Equisetales	Turkey	Diyarbakir	Hazro	38.2538	40.7808	Locality	Hazro	Ar Rayn	Arabia	250	7.16	-7.224	Turkey				uppermost Changhsingian		Changhsingian	0-10°N	16	0.445833	tropical_everwet	tropical_everwet	calculated	tropical_everwet
68	774	290	2	Abu Hamad et al.	2008		Pseudomariopteris	hallei		(Stockmans et Mathieu) Wagner				Wagner 1962; Archangelsky and Wagner 1983		Pseudomariopteris	hallei		(Stockmans et Mathieu) Wagner	incertae sedis	Callistophytales	Pteridospermatophyta	Callistophytales	Turkey	Diyarbakir	Hazro	38.2538	40.7808	Locality	Hazro	Ar Rayn	Arabia	250	7.16	-7.224	Turkey				uppermost Changhsingian		Changhsingian	0-10°N	16	0.445833	tropical_everwet	tropical_everwet	calculated	tropical_everwet
72	774	290	2	Abu Hamad et al.	2008		Sphenophyllum	koboense	cf.	Kobatake				Wagner 1962; Archangelsky and Wagner 1983		Sphenophyllum	koboense	cf.	Kobatake	Sphenophyllaceae	Sphenophyllales	Sphenophyta	Sphenophyllales	Turkey	Diyarbakir	Hazro	38.2538	40.7808	Locality	Hazro	Ar Rayn	Arabia	250	7.16	-7.224	Turkey				uppermost Changhsingian		Changhsingian	0-10°N	16	0.445833	tropical_everwet	tropical_everwet	calculated	tropical_everwet
80	2307	719	7	Accordi	1952		Voltzia		sp.							Voltzia		sp.		Voltziaceae	Voltziales	Coniferophyta	Voltziales	Italy	Belluno	Selva di Cadore	46.4486	12.0674	Locality	Selva di Cadore	Carnic Alps - South Karawanken	Western Europe - Alps	240	-3.722	13.157	Europe				Anisian		Anisian	20-30°N	231	1	tropical_summerwet		calculated	tropical_summerwet
538	643	255	105	Anderson & Anderson	2008		Asterotheca	chevronervia					Holmes, 2001			Asterotheca	chevronervia		Holmes, 2001	Asterothecaceae	Marattiales	Pteridophyta	Marattiales	Australia		Nymboida, Coal Mine area	-29.9009	152.704	Locality	Nymboida	Coffs-Harbour	Australia	240	101.545	-56.728	Australia	Basin Creek Formation		19	lower Ladinian		Ladinian	40-50°S	54	1	warm_temperate		calculated	warm_temperate
540	643	255	105	Anderson & Anderson	2008		Asterotheca	diameson					Holmes, 2001			Asterotheca	diameson		Holmes, 2001	Asterothecaceae	Marattiales	Pteridophyta	Marattiales	Australia		Nymboida, Coal Mine area	-29.9009	152.704	Locality	Nymboida	Coffs-Harbour	Australia	240	101.545	-56.728	Australia	Basin Creek Formation		19	lower Ladinian		Ladinian	40-50°S	54	1	warm_temperate		calculated	warm_temperate
541	644	256	107	Anderson & Anderson	2008		Asterotheca	herbstii					Playford et al., 1982			Asterotheca	herbstii		(Rigby, 1982) Anderson et Anderson, 2008	Asterothecaceae	Marattiales	Pteridophyta	Marattiales	Australia	Bowen Basin	Spring Creek	-33.3535	149.102	Locality		Molong	Australia	240	95.451	-60.067	Australia	Moolayember Formation		19	lower Ladinian		Ladinian	50-60°S	4	0.2875		warm_temperate	manual	warm_temperate
542	646	330	108	Anderson & Anderson	2008		Asterotheca	hillae					Walkom, 1924			Asterotheca	hillae		Walkom, 1924	Asterothecaceae	Marattiales	Pteridophyta	Marattiales	Australia	Ipswich/Esk	Wivenhoe	-27.3717	152.535	Locality	Wivenhoe Hill	Wandilla-Tablelands	Australia	240	101.324	-54.197	Australia	Esk Formation		19	lower Ladinian		Ladinian	40-50°S	20	1	warm_temperate		calculated	warm_temperate
545	674	264	110	Anderson & Anderson	2008		Asterotheca	menendezii					Herbst, 1977			Asterotheca	menendezii		De la Sota et Archangelsky, 1962	Asterothecaceae	Marattiales	Pteridophyta	Marattiales	Australia	Ipswich/Esk	Bryden	-27.2436	152.571	Locality		Wandilla-Tablelands	Australia	240	101.381	-54.07	Australia	Bryden Formation		19	lower Ladinian		Ladinian	40-50°S	20	1	warm_temperate		calculated	warm_temperate
546	675	568	111	Anderson & Anderson	2008		Asterotheca	menendezii					Herbst, 1977			Asterotheca	menendezii		De la Sota et Archangelsky, 1962	Asterothecaceae	Marattiales	Pteridophyta	Marattiales	Australia	Ipswich/Esk	Moombra School	-27.2392	152.42	City	Esk	Wandilla-Tablelands	Australia	240	101.663	-54.45	Australia	Esk Formation		19	lower Ladinian		Ladinian	40-50°S	20	1	warm_temperate		calculated	warm_temperate
547	643	255	105	Anderson & Anderson	2008		Asterotheca	nymboidensis					Flint & Gould, 1975			Asterotheca	nymboidensis		Holmes, 2001	Asterothecaceae	Marattiales	Pteridophyta	Marattiales	Australia		Nymboida, Coal Mine area	-29.9009	152.704	Locality	Nymboida	Coffs-Harbour	Australia	240	101.545	-56.728	Australia	Basin Creek Formation		19	lower Ladinian		Ladinian	40-50°S	54	1	warm_temperate		calculated	warm_temperate
548	643	255	105	Anderson & Anderson	2008		Asterotheca	nymboidensis					Holmes, 2001			Asterotheca	nymboidensis		Holmes, 2001	Asterothecaceae	Marattiales	Pteridophyta	Marattiales	Australia		Nymboida, Coal Mine area	-29.9009	152.704	Locality	Nymboida	Coffs-Harbour	Australia	240	101.545	-56.728	Australia	Basin Creek Formation		19	lower Ladinian		Ladinian	40-50°S	54	1	warm_temperate		calculated	warm_temperate
549	687	273	112	Anderson & Anderson	2008		Asterotheca	nymboidensis	cf.				Etheridge, 1895			Asterotheca	nymboidensis	cf.	Holmes, 2001	Asterothecaceae	Marattiales	Pteridophyta	Marattiales	Australia	Delungra	Warialda Creek	-29.5663	150.679	Locality		Woolomin-Texas	Australia	240	98.37	-56.353	Australia	Gunee beds		22	lower Ladinian		Ladinian	40-50°S	3	0.466667	warm_temperate	warm_temperate	calculated	warm_temperate
550	650	711	113	Anderson & Anderson	2008		Asterotheca	rigbyana					Townrow, 1957			Asterotheca	rigbyana		Herbst, 1977	Asterothecaceae	Marattiales	Pteridophyta	Marattiales	Australia	Sydney	Brookvale	-33.765	151.27	Locality	Brookvale	Sydney Basin	Australia	240	99.054	-60.567	Australia	Hawkesbury Sandstone		17	upper Anisian		Anisian	50-60°S	6	1	warm_temperate		calculated	warm_temperate
551	644	256	107	Anderson & Anderson	2008		Asterotheca		sp.							Asterotheca		sp.		Asterothecaceae	Marattiales	Pteridophyta	Marattiales	Australia	Bowen Basin	Spring Creek	-33.3535	149.102	Locality		Molong	Australia	240	95.451	-60.067	Australia	Moolayember Formation		19	lower Ladinian		Ladinian	50-60°S	4	0.2875		warm_temperate	manual	warm_temperate
554	646	330	108	Anderson & Anderson	2008		Asterotheca		sp.							Asterotheca		sp.		Asterothecaceae	Marattiales	Pteridophyta	Marattiales	Australia	Ipswich/Esk	Wivenhoe	-27.3717	152.535	Locality	Wivenhoe Hill	Wandilla-Tablelands	Australia	240	101.324	-54.197	Australia	Esk Formation		19	lower Ladinian		Ladinian	40-50°S	20	1	warm_temperate		calculated	warm_temperate
556	650	711	113	Anderson & Anderson	2008		Asterotheca		sp.							Asterotheca		sp.		Asterothecaceae	Marattiales	Pteridophyta	Marattiales	Australia	Sydney	Brookvale	-33.765	151.27	Locality	Brookvale	Sydney Basin	Australia	240	99.054	-60.567	Australia	Hawkesbury Sandstone		17	upper Anisian		Anisian	50-60°S	6	1	warm_temperate		calculated	warm_temperate
557	661	95	117	Anderson & Anderson	2008		Asterotheca		sp.							Asterotheca		sp.		Asterothecaceae	Marattiales	Pteridophyta	Marattiales	South Africa	Ka		-32.3635	22.5408	Region		Namaqua	Africa	250	-60.224	-52.403	South Africa	Burgersdorp Formation		11	Spathian		Olenekian	40-50°S	2	0.2		warm_temperate	manual	warm_temperate
560	643	255	105	Anderson & Anderson	2008		Asterotheca		sp. A				Holmes, 2001			Asterotheca		sp. A		Asterothecaceae	Marattiales	Pteridophyta	Marattiales	Australia		Nymboida, Coal Mine area	-29.9009	152.704	Locality	Nymboida	Coffs-Harbour	Australia	240	101.545	-56.728	Australia	Basin Creek Formation		19	lower Ladinian		Ladinian	40-50°S	54	1	warm_temperate		calculated	warm_temperate
561	316	93	120	Anderson & Anderson	2008		Asterotheca		sp. A							Asterotheca		sp. A		Asterothecaceae	Marattiales	Pteridophyta	Marattiales	South Africa			-32.3635	22.5408	Region		Namaqua	Africa	240	-56.146	-56.553	South Africa	Burgersdorp Formation		12	lower Anisian		Anisian	40-50°S	3	0.2		warm_temperate	manual	warm_temperate
562	643	255	105	Anderson & Anderson	2008		Asterotheca		sp. B				Holmes, 2001			Asterotheca		sp. B		Asterothecaceae	Marattiales	Pteridophyta	Marattiales	Australia		Nymboida, Coal Mine area	-29.9009	152.704	Locality	Nymboida	Coffs-Harbour	Australia	240	101.545	-56.728	Australia	Basin Creek Formation		19	lower Ladinian		Ladinian	40-50°S	54	1	warm_temperate		calculated	warm_temperate
563	643	255	105	Anderson & Anderson	2008		Asterotheca		sp. C				Holmes, 2001			Asterotheca		sp. C		Asterothecaceae	Marattiales	Pteridophyta	Marattiales	Australia		Nymboida, Coal Mine area	-29.9009	152.704	Locality	Nymboida	Coffs-Harbour	Australia	240	101.545	-56.728	Australia	Basin Creek Formation		19	lower Ladinian		Ladinian	40-50°S	54	1	warm_temperate		calculated	warm_temperate
564	643	255	105	Anderson & Anderson	2008		Asterotheca		sp. D				Holmes, 2001			Asterotheca		sp. D		Asterothecaceae	Marattiales	Pteridophyta	Marattiales	Australia		Nymboida, Coal Mine area	-29.9009	152.704	Locality	Nymboida	Coffs-Harbour	Australia	240	101.545	-56.728	Australia	Basin Creek Formation		19	lower Ladinian		Ladinian	40-50°S	54	1	warm_temperate		calculated	warm_temperate
566	643	255	105	Anderson & Anderson	2008		Asterotheca	trullensis					Holmes, 2001			Asterotheca	trullensis		Holmes, 2001	Asterothecaceae	Marattiales	Pteridophyta	Marattiales	Australia		Nymboida, Coal Mine area	-29.9009	152.704	Locality	Nymboida	Coffs-Harbour	Australia	240	101.545	-56.728	Australia	Basin Creek Formation		19	lower Ladinian		Ladinian	40-50°S	54	1	warm_temperate		calculated	warm_temperate
575	964	255	125	Anderson & Anderson	2008		Cladophlebis	australis					Flint & Gould, 1975			Cladophlebis	australis		(Morris) Seward, 1904	Osmundaceae	Osmundales	Pteridophyta	Osmundales	Australia		Nymboida, Red cliff	-29.9009	152.704	Locality	Nymboida	Coffs-Harbour	Australia	240	101.545	-56.728	Australia	Red Cliff CM		19	lower Ladinian		Ladinian	40-50°S	54	1	warm_temperate		calculated	warm_temperate
576	934	344	126	Anderson & Anderson	2008		Cladophlebis	australis					Retallack, 1983			Cladophlebis	australis		(Morris) Seward, 1904	Osmundaceae	Osmundales	Pteridophyta	Osmundales	New Zealand		Benmore Dam	-44.4217	170.22	Locality		Caples-Haast-Torlesse	Lord Howe-New Zealand	240	-170.876	-26.721	New Zealand	Black jack Conglomerate		21	upper Ladinian		Ladinian	10-20°N	3	0.244444		warm_temperate	manual	warm_temperate
581	891	326	128	Anderson & Anderson	2008		Cladophlebis	carnei					Retallack, 1995			Cladophlebis	carnei		Holmes et Ash, 1979	Osmundaceae	Osmundales	Pteridophyta	Osmundales	Australia	Canning Basin	Culvida Soak	-32.0396	115.911	Region	Canning	Pinjarra	Australia	250	45.211	-56.046	Australia	Culvida Formation		11	Spathian		Olenekian	40-50°S	5	0.43	warm_temperate	warm_temperate	calculated	warm_temperate
582	966	355	129	Anderson & Anderson	2008		Cladophlebis	carnei					Retallack, 1985			Cladophlebis	carnei		Holmes et Ash, 1979	Osmundaceae	Osmundales	Pteridophyta	Osmundales	New Zealand		Kaihiku Gorge	-46.2227	169.568	Locality		South Maitai Dun-Mountains	Lord Howe-New Zealand	240	-170.175	-28.472	New Zealand	Murihiku Supergroup		21	upper Ladinian		Ladinian	10-20°N	4	0.225		warm_temperate	manual	warm_temperate
583	643	255	105	Anderson & Anderson	2008		Cladophlebis	conferta					Holmes, 2003			Cladophlebis	conferata		Holmes, 2003	Osmundaceae	Osmundales	Pteridophyta	Osmundales	Australia		Nymboida, Coal Mine area	-29.9009	152.704	Locality	Nymboida	Coffs-Harbour	Australia	240	101.545	-56.728	Australia	Basin Creek Formation		19	lower Ladinian		Ladinian	40-50°S	54	1	warm_temperate		calculated	warm_temperate
588	976	358	132	Anderson & Anderson	2008		Cladophlebis	indica					Retallack, 1980			Cladophlebis	indica		(Oldham et Morris) Feistmantel	Osmundaceae	Osmundales	Pteridophyta	Osmundales	New Zealand		Tank Gully	-43.7557	171.162	(Locality)	Canterbury	Caples-Haast-Torlesse	Lord Howe-New Zealand	240	-170.65	-25.793	New Zealand	Tank Gully CM		21	upper Ladinian		Ladinian	10-20°N	3	1	warm_temperate		calculated	warm_temperate
608	643	255	105	Anderson & Anderson	2008		Cladophlebis	octonervia					Holmes, 2003			Cladophlebis	octonerva		Holmes, 2003	Osmundaceae	Osmundales	Pteridophyta	Osmundales	Australia		Nymboida, Coal Mine area	-29.9009	152.704	Locality	Nymboida	Coffs-Harbour	Australia	240	101.545	-56.728	Australia	Basin Creek Formation		19	lower Ladinian		Ladinian	40-50°S	54	1	warm_temperate		calculated	warm_temperate
616	643	255	105	Anderson & Anderson	2008		Cladophlebis	paucinervia					Holmes, 2003			Cladophlebis	paucinerva		Holmes, 2003	Osmundaceae	Osmundales	Pteridophyta	Osmundales	Australia		Nymboida, Coal Mine area	-29.9009	152.704	Locality	Nymboida	Coffs-Harbour	Australia	240	101.545	-56.728	Australia	Basin Creek Formation		19	lower Ladinian		Ladinian	40-50°S	54	1	warm_temperate		calculated	warm_temperate
617	643	255	105	Anderson & Anderson	2008		Cladophlebis	retallackii					Holmes, 2003			Cladophlebis	retallackii		Holmes, 2003	Osmundaceae	Osmundales	Pteridophyta	Osmundales	Australia		Nymboida, Coal Mine area	-29.9009	152.704	Locality	Nymboida	Coffs-Harbour	Australia	240	101.545	-56.728	Australia	Basin Creek Formation		19	lower Ladinian		Ladinian	40-50°S	54	1	warm_temperate		calculated	warm_temperate
618	899	255	141	Anderson & Anderson	2008		Cladophlebis	retallackii					Retallack et al., 1977			Cladophlebis	retallackii		Holmes, 2003	Osmundaceae	Osmundales	Pteridophyta	Osmundales	Australia		Nymboida, UNEL 1564	-29.9009	152.704	Locality	Nymboida	Coffs-Harbour	Australia	240	101.545	-56.728	Australia	Basin Creek Formation		19	lower Ladinian		Ladinian	40-50°S	54	1	warm_temperate		calculated	warm_temperate
619	920	337	142	Anderson & Anderson	2008		Cladophlebis	retallackii					Lele, 1962			Cladophlebis	retallackii		Holmes, 2003	Osmundaceae	Osmundales	Pteridophyta	Osmundales	India		Beli	22.3625	87.422	Locality		Singhbhum	India	240	24.739	-52.564	India	Parsora Formation		12	lower Anisian		Anisian	40-50°S	2	0.2		warm_temperate	manual	warm_temperate
620	1022	375	143	Anderson & Anderson	2008		Cladophlebis	retallackii					Lele, 1962			Cladophlebis	retallackii		Holmes, 2003	Osmundaceae	Osmundales	Pteridophyta	Osmundales	India		Kamtadand	24.5362	81.3037	Region	Rewa	Bundelkhand	India	240	21.144	-47.009	India	Parsora Formation		12	lower Anisian		Anisian	30-40°N	2	1	warm_temperate		calculated	warm_temperate
638	643	255	105	Anderson & Anderson	2008		Cladophlebis	sinuata					Holmes, 2003			Cladophlebis	sinuata		Holmes, 2003	Osmundaceae	Osmundales	Pteridophyta	Osmundales	Australia		Nymboida, Coal Mine area	-29.9009	152.704	Locality	Nymboida	Coffs-Harbour	Australia	240	101.545	-56.728	Australia	Basin Creek Formation		19	lower Ladinian		Ladinian	40-50°S	54	1	warm_temperate		calculated	warm_temperate
639	901	327	150	Anderson & Anderson	2008		Cladophlebis	sinuata					Holmes, 1982			Cladophlebis	sinuata		Holmes, 2003	Osmundaceae	Osmundales	Pteridophyta	Osmundales	Australia	Dubbo	Benolong	-32.4312	148.7	Locality	Benolong	Molong	Australia	240	94.909	-59.124	Australia	Napperby Formation		18	upper Anisian		Anisian	40-50°S	3	0.3		warm_temperate	manual	warm_temperate
640	899	255	141	Anderson & Anderson	2008		Cladophlebis		sp.				Retallack et al., 1977			Cladophlebis		sp.		Osmundaceae	Osmundales	Pteridophyta	Osmundales	Australia		Nymboida, UNEL 1564	-29.9009	152.704	Locality	Nymboida	Coffs-Harbour	Australia	240	101.545	-56.728	Australia	Basin Creek Formation		19	lower Ladinian		Ladinian	40-50°S	54	1	warm_temperate		calculated	warm_temperate
642	900	326	151	Anderson & Anderson	2008		Cladophlebis		sp.							Cladophlebis		sp.		Osmundaceae	Osmundales	Pteridophyta	Osmundales	Australia	Canning Basin		-32.0396	115.911	Region	Canning	Pinjarra	Australia	250	45.211	-56.046	Australia	Erskine Formation		10	Spathian		Olenekian	40-50°S	5	0.43	warm_temperate	warm_temperate	calculated	warm_temperate
643	687	273	112	Anderson & Anderson	2008		Cladophlebis		sp.				Etheridge, 1895			Cladophlebis		sp.		Osmundaceae	Osmundales	Pteridophyta	Osmundales	Australia	Delungra	Warialda Creek	-29.5663	150.679	Locality		Woolomin-Texas	Australia	240	98.37	-56.353	Australia	Gunee beds		22	lower Ladinian		Ladinian	40-50°S	3	0.466667	warm_temperate	warm_temperate	calculated	warm_temperate
644	901	327	150	Anderson & Anderson	2008		Cladophlebis		sp.				Tenison-Woods, 1883			Cladophlebis		sp.		Osmundaceae	Osmundales	Pteridophyta	Osmundales	Australia	Dubbo	Benolong	-32.4312	148.7	Locality	Benolong	Molong	Australia	240	94.909	-59.124	Australia	Napperby Formation		18	upper Anisian		Anisian	40-50°S	3	0.3		warm_temperate	manual	warm_temperate
645	902	328	152	Anderson & Anderson	2008		Cladophlebis		sp.				Walkom, 1917			Cladophlebis		sp.		Osmundaceae	Osmundales	Pteridophyta	Osmundales	Australia	Ipswich/Esk	Mt. Esk	152.42	152.451	Locality		Wandilla-Tablelands	Australia	240	101.2	-54.042	Australia	Esk Formation		19	lower Ladinian		Ladinian	40-50°S	21	1	warm_temperate		calculated	warm_temperate
646	903	329	153	Anderson & Anderson	2008		Cladophlebis		sp.				Walkom, 1928			Cladophlebis		sp.		Osmundaceae	Osmundales	Pteridophyta	Osmundales	Australia	Ipswich/Esk	Ottaba	-27.1455	152.397	Locality		Wandilla-Tablelands	Australia	240	101.119	-53.969	Australia	Esk Formation		19	lower Ladinian		Ladinian	40-50°S	21	1	warm_temperate		calculated	warm_temperate
647	646	330	108	Anderson & Anderson	2008		Cladophlebis		sp.				Walkom, 1924			Cladophlebis		sp.		Osmundaceae	Osmundales	Pteridophyta	Osmundales	Australia	Ipswich/Esk	Wivenhoe	-27.3717	152.535	Locality	Wivenhoe Hill	Wandilla-Tablelands	Australia	240	101.324	-54.197	Australia	Esk Formation		19	lower Ladinian		Ladinian	40-50°S	20	1	warm_temperate		calculated	warm_temperate
648	646	330	108	Anderson & Anderson	2008		Cladophlebis		sp.							Cladophlebis		sp.		Osmundaceae	Osmundales	Pteridophyta	Osmundales	Australia	Ipswich/Esk	Wivenhoe	-27.3717	152.535	Locality	Wivenhoe Hill	Wandilla-Tablelands	Australia	240	101.324	-54.197	Australia	Esk Formation		19	lower Ladinian		Ladinian	40-50°S	20	1	warm_temperate		calculated	warm_temperate
649	904	330	154	Anderson & Anderson	2008		Cladophlebis		sp.				Walkom, 1924			Cladophlebis		sp.		Osmundaceae	Osmundales	Pteridophyta	Osmundales	Australia	Ipswich/Esk	Wivenhoe Hill	-27.3717	152.535	Locality	Wivenhoe Hill	Wandilla-Tablelands	Australia	240	101.324	-54.197	Australia	Esk Formation		19	lower Ladinian		Ladinian	40-50°S	20	1	warm_temperate		calculated	warm_temperate
650	905	331	155	Anderson & Anderson	2008		Cladophlebis		sp.				Holmes & Ash, 1979			Cladophlebis		sp.		Osmundaceae	Osmundales	Pteridophyta	Osmundales	Australia	Lorne Basin	Grants Head	-31.6005	152.847	Locality	Grants Head	Nambucca	Australia	240	101.751	-58.428	Australia	Camden Head Claystone		22	lower Ladinian		Ladinian	40-50°S	2	0.225		warm_temperate	manual	warm_temperate
655	909	259	159	Anderson & Anderson	2008		Cladophlebis		sp.				Walkom, 1925			Cladophlebis		sp.		Osmundaceae	Osmundales	Pteridophyta	Osmundales	Australia	Sydney	Turrimetta Head	-33.6962	151.315	Locality		Sydney Basin	Australia	250	105.746	-65.772	Australia	Gosford Fm.		9	Spathian		Olenekian	50-60°S	13	0.398718	warm_temperate	warm_temperate	calculated	warm_temperate
656	650	711	113	Anderson & Anderson	2008		Cladophlebis		sp.							Cladophlebis		sp.		Osmundaceae	Osmundales	Pteridophyta	Osmundales	Australia	Sydney	Brookvale	-33.765	151.27	Locality	Brookvale	Sydney Basin	Australia	240	99.054	-60.567	Australia	Hawkesbury Sandstone		17	upper Anisian		Anisian	50-60°S	6	1	warm_temperate		calculated	warm_temperate
658	920	337	142	Anderson & Anderson	2008		Cladophlebis		sp.				Lele, 1962			Cladophlebis		sp.		Osmundaceae	Osmundales	Pteridophyta	Osmundales	India		Beli	22.3625	87.422	Locality		Singhbhum	India	240	24.739	-52.564	India	Parsora Formation		12	lower Anisian		Anisian	40-50°S	2	0.2		warm_temperate	manual	warm_temperate
659	921	338	161	Anderson & Anderson	2008		Cladophlebis		sp.				Feistmantel, 1882			Cladophlebis		sp.		Osmundaceae	Osmundales	Pteridophyta	Osmundales	India		Parsora	23.2431	77.7967	Locality		Bundelkhand	India	240	16.78	-45.328	India	Parsora Formation		12	lower Anisian		Anisian	30-40°N	3	1	warm_temperate		calculated	warm_temperate
660	921	338	161	Anderson & Anderson	2008		Cladophlebis		sp.				Lele, 1962			Cladophlebis		sp.		Osmundaceae	Osmundales	Pteridophyta	Osmundales	India		Parsora	23.2431	77.7967	Locality		Bundelkhand	India	240	16.78	-45.328	India	Parsora Formation		12	lower Anisian		Anisian	30-40°N	3	1	warm_temperate		calculated	warm_temperate
661	922	339	162	Anderson & Anderson	2008		Cladophlebis		sp.							Cladophlebis		sp.		Osmundaceae	Osmundales	Pteridophyta	Osmundales	India	PI	Parsora	23.2431	77.7967	Locality		Bundelkhand	India	250	12.983	-48.051	India	Parsora Formation		11	Spathian		Olenekian	30-40°N	2	1	warm_temperate		calculated	warm_temperate
662	934	344	126	Anderson & Anderson	2008		Cladophlebis		sp.				Retallack, 1983			Cladophlebis		sp.		Osmundaceae	Osmundales	Pteridophyta	Osmundales	New Zealand		Benmore Dam	-44.4217	170.22	Locality		Caples-Haast-Torlesse	Lord Howe-New Zealand	240	-170.876	-26.721	New Zealand	Black jack Conglomerate		21	upper Ladinian		Ladinian	10-20°N	3	0.244444		warm_temperate	manual	warm_temperate
663	933	343	163	Anderson & Anderson	2008		Cladophlebis		sp.				Retallack, 1985			Cladophlebis		sp.		Osmundaceae	Osmundales	Pteridophyta	Osmundales	New Zealand		Ben Callum	-45.9167	168.484	Locality		Brook-Mihiriku	Lord Howe-New Zealand	240	-171.078	-28.644	New Zealand	Murihiku Supergroup		21	upper Ladinian		Ladinian	10-20°N	4	0.225		warm_temperate	manual	warm_temperate
665	935	345	165	Anderson & Anderson	2008		Cladophlebis		sp.				Retallack, 1981			Cladophlebis		sp.		Osmundaceae	Osmundales	Pteridophyta	Osmundales	New Zealand		Long Gully	-41.3147	174.727	Locality	Long Gully Station	Pahau	Lord Howe-New Zealand	240	-172.739	-27.477	New Zealand	Tank Gully CM		21	upper Ladinian		Ladinian	10-20°N	2	0.266667		warm_temperate	manual	warm_temperate
666	661	95	117	Anderson & Anderson	2008		Cladophlebis		sp.							Cladophlebis		sp.		Osmundaceae	Osmundales	Pteridophyta	Osmundales	South Africa	Ka		-32.3635	22.5408	Region		Namaqua	Africa	250	-60.224	-52.403	South Africa	Burgersdorp Formation		11	Spathian		Olenekian	40-50°S	2	0.2		warm_temperate	manual	warm_temperate
669	956	279	166	Anderson & Anderson	2008		Cladophlebis		sp.							Cladophlebis		sp.		Osmundaceae	Osmundales	Pteridophyta	Osmundales	Argentina	North Argentina	Barreal	-31.6348	-69.4754	Locality		East Chilenia	Southern Andes	240	-74.045	-41.399	South America	Barreal Formation		22	upper Ladinian		Ladinian	30-40°N	8	0.4625		warm_temperate	manual	warm_temperate
676	953	93	173	Anderson & Anderson	2008		Cladophlebis		sp. A				Anderson & Anderson, 1985			Cladophlebis		sp. A		Osmundaceae	Osmundales	Pteridophyta	Osmundales	South Africa		Acocks Quarry	-32.3635	22.5408	Region	Karoo National park	Namaqua	Africa	240	-56.146	-56.553	South Africa	Burgersdorp Formation		12	lower Anisian		Anisian	40-50°S	3	0.2		warm_temperate	manual	warm_temperate
677	954	93	174	Anderson & Anderson	2008		Cladophlebis		sp. A				Anderson & Anderson, 1985			Cladophlebis		sp. A		Osmundaceae	Osmundales	Pteridophyta	Osmundales	South Africa		Reservoir	-32.3635	22.5408	Region	Karoo National park	Namaqua	Africa	240	-56.146	-56.553	South Africa	Burgersdorp Formation		12	lower Anisian		Anisian	40-50°S	3	0.2		warm_temperate	manual	warm_temperate
678	643	255	105	Anderson & Anderson	2008		Cladophlebis	tenuipinnula					Holmes, 2003			Cladophlebis	tenuipinnula		Holmes, 2003	Osmundaceae	Osmundales	Pteridophyta	Osmundales	Australia		Nymboida, Coal Mine area	-29.9009	152.704	Locality	Nymboida	Coffs-Harbour	Australia	240	101.545	-56.728	Australia	Basin Creek Formation		19	lower Ladinian		Ladinian	40-50°S	54	1	warm_temperate		calculated	warm_temperate
679	643	255	105	Anderson & Anderson	2008		Dictyonymba	sparnosa					Holmes, 2003			Dictyonymba	sparnosa		Holmes, 2003	incertae sedis	incertae sedis	Pteridophyta	Pteridophyta incertae sedis	Australia		Nymboida, Coal Mine area	-29.9009	152.704	Locality	Nymboida	Coffs-Harbour	Australia	240	101.545	-56.728	Australia	Basin Creek Formation		19	lower Ladinian		Ladinian	40-50°S	54	1	warm_temperate		calculated	warm_temperate
680	1252	279	175	Anderson & Anderson	2008		Dictyophyllum	barrealensis					Menendez, 1957			Dictyophyllum	barrealensis		Stipanicic et Menéndez, 1949	Dipteridaceae	Filicales	Pteridophyta	Filicales	South America		Q. de Astorga	-31.6348	-69.4754	Region	Barreal (San Juan)	East Chilenia	Southern Andes	240	-74.045	-41.399	South America	Alcazar Formation		22	upper Ladinian		Ladinian	30-40°N	8	0.4625		warm_temperate	manual	warm_temperate
681	1249	279	176	Anderson & Anderson	2008		Dictyophyllum	barrealensis					Stip & Menendez, 1949			Dictyophyllum	barrealensis		Stipanicic et Menéndez, 1949	Dipteridaceae	Filicales	Pteridophyta	Filicales	Argentina	San Juan Province	Barreal	-31.6348	-69.4754	Locality		East Chilenia	Southern Andes	240	-74.045	-41.399	South America	Barreal Formation		22	upper Ladinian		Ladinian	30-40°N	8	0.4625		warm_temperate	manual	warm_temperate
682	1251	279	177	Anderson & Anderson	2008		Dictyophyllum	barrealensis					Herbst, 1992			Dictyophyllum	barrealensis		Stipanicic et Menéndez, 1949	Dipteridaceae	Filicales	Pteridophyta	Filicales	South America		Q. Cortaderita	-31.6348	-69.4754	City	Barreal	East Chilenia	Southern Andes	240	-74.045	-41.399	South America	Barreal Formation		22	upper Ladinian		Ladinian	30-40°N	8	0.4625		warm_temperate	manual	warm_temperate
686	643	255	105	Anderson & Anderson	2008		Dictyophyllum	davidii					Flint & Gould, 1975			Dictyophyllum	davidii		Walkom, 1917	Dipteridaceae	Filicales	Pteridophyta	Filicales	Australia		Nymboida, Coal Mine area	-29.9009	152.704	Locality	Nymboida	Coffs-Harbour	Australia	240	101.545	-56.728	Australia	Basin Creek Formation		19	lower Ladinian		Ladinian	40-50°S	54	1	warm_temperate		calculated	warm_temperate
687	643	255	105	Anderson & Anderson	2008		Dictyophyllum	davidii					Holmes, 2001			Dictyophyllum	davidii		Walkom, 1917	Dipteridaceae	Filicales	Pteridophyta	Filicales	Australia		Nymboida, Coal Mine area	-29.9009	152.704	Locality	Nymboida	Coffs-Harbour	Australia	240	101.545	-56.728	Australia	Basin Creek Formation		19	lower Ladinian		Ladinian	40-50°S	54	1	warm_temperate		calculated	warm_temperate
688	1254	255	179	Anderson & Anderson	2008		Dictyophyllum	davidii					Webb, 1982			Dictyophyllum	davidii		Walkom, 1917	Dipteridaceae	Filicales	Pteridophyta	Filicales	Australia		Nymboida, UQL 3745	-29.9009	152.704	Locality	Nymboida	Coffs-Harbour	Australia	240	101.545	-56.728	Australia	Basin Creek Formation		19	lower Ladinian		Ladinian	40-50°S	54	1	warm_temperate		calculated	warm_temperate
689	1255	568	180	Anderson & Anderson	2008		Dictyophyllum	davidii					Walkom, 1917			Dictyophyllum	davidii		Walkom, 1917	Dipteridaceae	Filicales	Pteridophyta	Filicales	Australia	Ipswich/Esk	Esk	-27.2392	152.42	Locality		Wandilla-Tablelands	Australia	240	101.663	-54.45	Australia	Esk Formation		19	lower Ladinian		Ladinian	40-50°S	20	1	warm_temperate		calculated	warm_temperate
690	1257	436	181	Anderson & Anderson	2008		Dictyophyllum	davidii					Herbst, 1979			Dictyophyllum	davidii		Walkom, 1917	Dipteridaceae	Filicales	Pteridophyta	Filicales	Australia	Ipswich/Esk	Parish Biarra	-27.1703	152.364	Locality		Wandilla-Tablelands	Australia	240	101.069	-53.994	Australia	Esk Formation		19	lower Ladinian		Ladinian	40-50°S	21	1	warm_temperate		calculated	warm_temperate
691	646	330	108	Anderson & Anderson	2008		Dictyophyllum	davidii								Dictyophyllum	davidii		Walkom, 1917	Dipteridaceae	Filicales	Pteridophyta	Filicales	Australia	Ipswich/Esk	Wivenhoe	-27.3717	152.535	Locality	Wivenhoe Hill	Wandilla-Tablelands	Australia	240	101.324	-54.197	Australia	Esk Formation		19	lower Ladinian		Ladinian	40-50°S	20	1	warm_temperate		calculated	warm_temperate
692	904	330	154	Anderson & Anderson	2008		Dictyophyllum	davidii					Herbst, 1979			Dictyophyllum	davidii		Walkom, 1917	Dipteridaceae	Filicales	Pteridophyta	Filicales	Australia	Ipswich/Esk	Wivenhoe Hill	-27.3717	152.535	Locality	Wivenhoe Hill	Wandilla-Tablelands	Australia	240	101.324	-54.197	Australia	Esk Formation		19	lower Ladinian		Ladinian	40-50°S	20	1	warm_temperate		calculated	warm_temperate
693	1256	435	182	Anderson & Anderson	2008		Dictyophyllum	davidii					Webb, 1982			Dictyophyllum	davidii		Walkom, 1917	Dipteridaceae	Filicales	Pteridophyta	Filicales	Australia	Ipswich/Esk	Manumbar	-26.3539	152.305	Locality		Gympie	Australia	240	100.987	-53.184	Australia	Neara Volcanics		19	lower Ladinian		Ladinian	40-50°S	4	0.35		warm_temperate	manual	warm_temperate
703	956	279	166	Anderson & Anderson	2008		Dictyophyllum		sp.							Dictyophyllum		sp.		Dipteridaceae	Filicales	Pteridophyta	Filicales	Argentina	North Argentina	Barreal	-31.6348	-69.4754	Locality		East Chilenia	Southern Andes	240	-74.045	-41.399	South America	Barreal Formation		22	upper Ladinian		Ladinian	30-40°N	8	0.4625		warm_temperate	manual	warm_temperate
706	1249	279	176	Anderson & Anderson	2008		Dictyophyllum		sp.				Stip & Menendez, 1949			Dictyophyllum		sp.		Dipteridaceae	Filicales	Pteridophyta	Filicales	Argentina	San Juan Province	Barreal	-31.6348	-69.4754	Locality		East Chilenia	Southern Andes	240	-74.045	-41.399	South America	Barreal Formation		22	upper Ladinian		Ladinian	30-40°N	8	0.4625		warm_temperate	manual	warm_temperate
711	661	96	186	Anderson & Anderson	2008		Displinites	variabilis								Displinites	variabilis		Anderson et Anderson, 2008	incertae sedis	Filicales	Pteridophyta	Filicales	South Africa	Ka		-32.3635	22.5408	Region		Namaqua	Africa	240	-56.146	-56.553	South Africa			18	lower Ladinian		Ladinian	40-50°S	2	1	warm_temperate		calculated	warm_temperate
712	661	96	186	Anderson & Anderson	2008		Displinites	variabilis								Displinites	variabilis		Anderson et Anderson, 2008	incertae sedis	Filicales	Pteridophyta	Filicales	South Africa	Ka		-32.3635	22.5408	Region		Namaqua	Africa	240	-56.146	-56.553	South Africa			19	lower Ladinian		Ladinian	40-50°S	2	1	warm_temperate		calculated	warm_temperate
732	1648	749	189	Anderson & Anderson	2008		Gleichenipteris	antarcticus					Phipps et al., 2000			Gleichenipteris	antarcticus		Phipps et al., 2000	Gleicheniaceae	Filicales	Pteridophyta	Filicales	Antarctica		Fremouw Peak	-84.2833	164.333	Locality		Mawson	East Antarctica	240	36.165	-76.301	Antarctica	Fremouw Formation		19	lower Ladinian		Ladinian	60-70°S	3	1	cold_temperate		calculated	cold_temperate
734	687	273	112	Anderson & Anderson	2008	?	Gleichenites		sp.				Etheridge, 1895		?	Gleichenites		sp.		Gleicheniaceae	Filicales	Pteridophyta	Filicales	Australia	Delungra	Warialda Creek	-29.5663	150.679	Locality		Woolomin-Texas	Australia	240	98.37	-56.353	Australia	Gunee beds		22	lower Ladinian		Ladinian	40-50°S	3	0.466667	warm_temperate	warm_temperate	calculated	warm_temperate
735	643	255	105	Anderson & Anderson	2008		Gleichenites	wivenhoensis					Holmes, 2001			Gleichenites	wivenhoensis		Herbst, 1974	Gleicheniaceae	Filicales	Pteridophyta	Filicales	Australia		Nymboida, Coal Mine area	-29.9009	152.704	Locality	Nymboida	Coffs-Harbour	Australia	240	101.545	-56.728	Australia	Basin Creek Formation		19	lower Ladinian		Ladinian	40-50°S	54	1	warm_temperate		calculated	warm_temperate
736	904	330	154	Anderson & Anderson	2008		Gleichenites	wivenhoensis					Herbst, 1974			Gleichenites	wivenhoensis		Herbst, 1974	Gleicheniaceae	Filicales	Pteridophyta	Filicales	Australia	Ipswich/Esk	Wivenhoe Hill	-27.3717	152.535	Locality	Wivenhoe Hill	Wandilla-Tablelands	Australia	240	101.324	-54.197	Australia	Esk Formation		19	lower Ladinian		Ladinian	40-50°S	20	1	warm_temperate		calculated	warm_temperate
737	643	255	105	Anderson & Anderson	2008		Gouldiopteris	alethopteroides					Holmes, 2003			Gouldiopteris	alethopteroides			incertae sedis	incertae sedis	Pteridophyta	Pteridophyta incertae sedis	Australia		Nymboida, Coal Mine area	-29.9009	152.704	Locality	Nymboida	Coffs-Harbour	Australia	240	101.545	-56.728	Australia	Basin Creek Formation		19	lower Ladinian		Ladinian	40-50°S	54	1	warm_temperate		calculated	warm_temperate
738	1252	279	175	Anderson & Anderson	2008		Hausmannia	faltisiana					Herbst, 1977			Hausmannia	faltisiana		Stipanicic et Menéndez, 1949	Dipteridaceae	Filicales	Pteridophyta	Filicales	South America		Q. de Astorga	-31.6348	-69.4754	Region	Barreal (San Juan)	East Chilenia	Southern Andes	240	-74.045	-41.399	South America	Alcazar Formation		22	upper Ladinian		Ladinian	30-40°N	8	0.4625		warm_temperate	manual	warm_temperate
739	1249	279	176	Anderson & Anderson	2008		Hausmannia	faltisiana					Stip & Menendez, 1949			Hausmannia	faltisiana		Stipanicic et Menéndez, 1949	Dipteridaceae	Filicales	Pteridophyta	Filicales	Argentina	San Juan Province	Barreal	-31.6348	-69.4754	Locality		East Chilenia	Southern Andes	240	-74.045	-41.399	South America	Barreal Formation		22	upper Ladinian		Ladinian	30-40°N	8	0.4625		warm_temperate	manual	warm_temperate
740	643	255	105	Anderson & Anderson	2008		Hausmannia	reticulata					Holmes, 2001			Hausmannia	reticulata		Holmes, 2001	Dipteridaceae	Filicales	Pteridophyta	Filicales	Australia		Nymboida, Coal Mine area	-29.9009	152.704	Locality	Nymboida	Coffs-Harbour	Australia	240	101.545	-56.728	Australia	Basin Creek Formation		19	lower Ladinian		Ladinian	40-50°S	54	1	warm_temperate		calculated	warm_temperate
741	643	255	105	Anderson & Anderson	2008		Herbstopteris	colliveri					Holmes, 2001			Herbstopteris	colliveri		Holmes, 2001	Asterothecaceae	Marattiales	Pteridophyta	Marattiales	Australia		Nymboida, Coal Mine area	-29.9009	152.704	Locality	Nymboida	Coffs-Harbour	Australia	240	101.545	-56.728	Australia	Basin Creek Formation		19	lower Ladinian		Ladinian	40-50°S	54	1	warm_temperate		calculated	warm_temperate
742	643	255	105	Anderson & Anderson	2008		Herbstopteris		sp. A				Holmes, 2001			Herbstopteris		sp. A		Asterothecaceae	Marattiales	Pteridophyta	Marattiales	Australia		Nymboida, Coal Mine area	-29.9009	152.704	Locality	Nymboida	Coffs-Harbour	Australia	240	101.545	-56.728	Australia	Basin Creek Formation		19	lower Ladinian		Ladinian	40-50°S	54	1	warm_temperate		calculated	warm_temperate
743	643	255	105	Anderson & Anderson	2008		Lecomana	stachyophylla					Holmes, 2003			Leconama	stachyophylla		Holmes, 2003	incertae sedis	incertae sedis	Pteridophyta	Pteridophyta incertae sedis	Australia		Nymboida, Coal Mine area	-29.9009	152.704	Locality	Nymboida	Coffs-Harbour	Australia	240	101.545	-56.728	Australia	Basin Creek Formation		19	lower Ladinian		Ladinian	40-50°S	54	1	warm_temperate		calculated	warm_temperate
744	643	255	105	Anderson & Anderson	2008		Leconama	stachyphylla					Flint & Gould, 1975			Leconama	stachyophylla		Holmes, 2003	incertae sedis	incertae sedis	Pteridophyta	Pteridophyta incertae sedis	Australia		Nymboida, Coal Mine area	-29.9009	152.704	Locality	Nymboida	Coffs-Harbour	Australia	240	101.545	-56.728	Australia	Basin Creek Formation		19	lower Ladinian		Ladinian	40-50°S	54	1	warm_temperate		calculated	warm_temperate
745	899	255	141	Anderson & Anderson	2008		Leconama	stachyphylla					Retallack et al., 1977			Leconama	stachyophylla		Holmes, 2003	incertae sedis	incertae sedis	Pteridophyta	Pteridophyta incertae sedis	Australia		Nymboida, UNEL 1564	-29.9009	152.704	Locality	Nymboida	Coffs-Harbour	Australia	240	101.545	-56.728	Australia	Basin Creek Formation		19	lower Ladinian		Ladinian	40-50°S	54	1	warm_temperate		calculated	warm_temperate
746	643	255	105	Anderson & Anderson	2008		Marantoidea	acara					Holmes, 2001			Danaeopsis	acara		Webb, 2001	Marattiaceae	Marattiales	Pteridophyta	Marattiales	Australia		Nymboida, Coal Mine area	-29.9009	152.704	Locality	Nymboida	Coffs-Harbour	Australia	240	101.545	-56.728	Australia	Basin Creek Formation		19	lower Ladinian		Ladinian	40-50°S	54	1	warm_temperate		calculated	warm_temperate
747	1254	255	179	Anderson & Anderson	2008		Marantoidea	acara					Webb, 2001			Danaeopsis	acara		Webb, 2001	Marattiaceae	Marattiales	Pteridophyta	Marattiales	Australia		Nymboida, UQL 3745	-29.9009	152.704	Locality	Nymboida	Coffs-Harbour	Australia	240	101.545	-56.728	Australia	Basin Creek Formation		19	lower Ladinian		Ladinian	40-50°S	54	1	warm_temperate		calculated	warm_temperate
748	1758	568	191	Anderson & Anderson	2008		Marantoidea	acara					Webb, 2001			Danaeopsis	acara		Webb, 2001	Marattiaceae	Marattiales	Pteridophyta	Marattiales	Australia	Somerset	Ipswich/Esk	-27.623	152.76	Locality	Ipswich	Wandilla-Tablelands	Australia	240	101.663	-54.45	Australia	Bryden Formation		19	lower Ladinian		Ladinian	40-50°S	20	1	warm_temperate		calculated	warm_temperate
749	644	256	107	Anderson & Anderson	2008		Marattiopsis		sp.				Playford et al., 1982			Marattiopsis		sp.		Marattiaceae	Marattiales	Pteridophyta	Marattiales	Australia	Bowen Basin	Spring Creek	-33.3535	149.102	Locality		Molong	Australia	240	95.451	-60.067	Australia	Moolayember Formation		19	lower Ladinian		Ladinian	50-60°S	4	0.2875		warm_temperate	manual	warm_temperate
750	643	255	105	Anderson & Anderson	2008		Micronymbopteris	repens					Holmes, 2003			Micronymbopteris	repens		Holmes, 2003	incertae sedis	incertae sedis	Pteridophyta	Pteridophyta incertae sedis	Australia		Nymboida, Coal Mine area	-29.9009	152.704	Locality	Nymboida	Coffs-Harbour	Australia	240	101.545	-56.728	Australia	Basin Creek Formation		19	lower Ladinian		Ladinian	40-50°S	54	1	warm_temperate		calculated	warm_temperate
753	643	255	105	Anderson & Anderson	2008		Nymbiella	lacerata					Holmes, 2003			Nymbiella	lacerata		Holmes, 2003	incertae sedis	Filicales	Pteridophyta	Filicales	Australia		Nymboida, Coal Mine area	-29.9009	152.704	Locality	Nymboida	Coffs-Harbour	Australia	240	101.545	-56.728	Australia	Basin Creek Formation		19	lower Ladinian		Ladinian	40-50°S	54	1	warm_temperate		calculated	warm_temperate
754	643	255	105	Anderson & Anderson	2008		Nymbofelicia	aggregata					Holmes, 2001			Nymbofelicia	aggregata		Holmes, 2001	incertae sedis	Filicales	Pteridophyta	Filicales	Australia		Nymboida, Coal Mine area	-29.9009	152.704	Locality	Nymboida	Coffs-Harbour	Australia	240	101.545	-56.728	Australia	Basin Creek Formation		19	lower Ladinian		Ladinian	40-50°S	54	1	warm_temperate		calculated	warm_temperate
755	643	255	105	Anderson & Anderson	2008		Nymboidiantum	elegans					Holmes, 2003			Nymboidiantum	elegans		Holmes, 2003	incertae sedis	Filicales	Pteridophyta	Filicales	Australia		Nymboida, Coal Mine area	-29.9009	152.704	Locality	Nymboida	Coffs-Harbour	Australia	240	101.545	-56.728	Australia	Basin Creek Formation		19	lower Ladinian		Ladinian	40-50°S	54	1	warm_temperate		calculated	warm_temperate
756	643	255	105	Anderson & Anderson	2008		Nymboidiantum	fractiflexus					Holmes, 2003			Nymboidiantum	fractiflexus		Holmes, 2003	incertae sedis	Filicales	Pteridophyta	Filicales	Australia		Nymboida, Coal Mine area	-29.9009	152.704	Locality	Nymboida	Coffs-Harbour	Australia	240	101.545	-56.728	Australia	Basin Creek Formation		19	lower Ladinian		Ladinian	40-50°S	54	1	warm_temperate		calculated	warm_temperate
757	643	255	105	Anderson & Anderson	2008		Nymboidiantum	glossophyllum					Holmes, 2003			Nymboidiantum	glossophyllum		Holmes, 2003	incertae sedis	Filicales	Pteridophyta	Filicales	Australia		Nymboida, Coal Mine area	-29.9009	152.704	Locality	Nymboida	Coffs-Harbour	Australia	240	101.545	-56.728	Australia	Basin Creek Formation		19	lower Ladinian		Ladinian	40-50°S	54	1	warm_temperate		calculated	warm_temperate
758	1842	591	193	Anderson & Anderson	2008		Nymboidiantum	glossophyllum					Tenison-Woods, 1883			Nymboidiantum	glossophyllum		Holmes, 2003	incertae sedis	Filicales	Pteridophyta	Filicales	Australia	Dubbo	Ballimore	-32.1726	148.916	Locality		Molong	Australia	240	95.297	-58.879	Australia	Napperby Formation		18	upper Anisian		Anisian	40-50°S	3	0.3		warm_temperate	manual	warm_temperate
759	646	330	108	Anderson & Anderson	2008		Nymboidiantum	moombraense					Hill et al., 1965			Nymboidiantum	moombraense		(Walkom, 1928) Anderson et Anderson, 2008	incertae sedis	Filicales	Pteridophyta	Filicales	Australia	Ipswich/Esk	Wivenhoe	-27.3717	152.535	Locality	Wivenhoe Hill	Wandilla-Tablelands	Australia	240	101.324	-54.197	Australia	Esk Formation		19	lower Ladinian		Ladinian	40-50°S	20	1	warm_temperate		calculated	warm_temperate
760	643	255	105	Anderson & Anderson	2008		Nymboidiantum	multilobatum					Holmes, 2003			Nymboidiantum	multilobatum		Holmes, 2003	incertae sedis	Filicales	Pteridophyta	Filicales	Australia		Nymboida, Coal Mine area	-29.9009	152.704	Locality	Nymboida	Coffs-Harbour	Australia	240	101.545	-56.728	Australia	Basin Creek Formation		19	lower Ladinian		Ladinian	40-50°S	54	1	warm_temperate		calculated	warm_temperate
761	643	255	105	Anderson & Anderson	2008		Nymboidiantum	robustum					Holmes, 2003			Nymboidiantum	robustum		Holmes, 2003	incertae sedis	Filicales	Pteridophyta	Filicales	Australia		Nymboida, Coal Mine area	-29.9009	152.704	Locality	Nymboida	Coffs-Harbour	Australia	240	101.545	-56.728	Australia	Basin Creek Formation		19	lower Ladinian		Ladinian	40-50°S	54	1	warm_temperate		calculated	warm_temperate
763	643	255	105	Anderson & Anderson	2008		Nymbophlebis	polymorpha					Holmes, 2003			Nymbophlebis	polymorpha		Holmes, 2003	incertae sedis	incertae sedis	Pteridophyta	Pteridophyta incertae sedis	Australia		Nymboida, Coal Mine area	-29.9009	152.704	Locality	Nymboida	Coffs-Harbour	Australia	240	101.545	-56.728	Australia	Basin Creek Formation		19	lower Ladinian		Ladinian	40-50°S	54	1	warm_temperate		calculated	warm_temperate
764	976	358	132	Anderson & Anderson	2008		Lobifolia	dejerseyi					Retallack, 1980			Nymbopteron	dejerseyi		Holmes, 2003	incertae sedis	Osmundales	Pteridophyta	Osmundales	New Zealand		Tank Gully	-43.7557	171.162	(Locality)	Canterbury	Caples-Haast-Torlesse	Lord Howe-New Zealand	240	-170.65	-25.793	New Zealand	Tank Gully CM		21	upper Ladinian		Ladinian	10-20°N	3	1	warm_temperate		calculated	warm_temperate
765	643	255	105	Anderson & Anderson	2008		Nymbopteron	dejerseyi					Flint & Gould, 1975			Nymbopteron	dejerseyi		Holmes, 2003	incertae sedis	Osmundales	Pteridophyta	Osmundales	Australia		Nymboida, Coal Mine area	-29.9009	152.704	Locality	Nymboida	Coffs-Harbour	Australia	240	101.545	-56.728	Australia	Basin Creek Formation		19	lower Ladinian		Ladinian	40-50°S	54	1	warm_temperate		calculated	warm_temperate
766	643	255	105	Anderson & Anderson	2008		Nymbopteron	dejerseyi					Holmes, 2003			Nymbopteron	dejerseyi		Holmes, 2003	incertae sedis	Osmundales	Pteridophyta	Osmundales	Australia		Nymboida, Coal Mine area	-29.9009	152.704	Locality	Nymboida	Coffs-Harbour	Australia	240	101.545	-56.728	Australia	Basin Creek Formation		19	lower Ladinian		Ladinian	40-50°S	54	1	warm_temperate		calculated	warm_temperate
767	675	568	111	Anderson & Anderson	2008		Nymbopteron	dejerseyi					Pattemore & Rigby, 2005			Nymbopteron	dejerseyi		Holmes, 2003	incertae sedis	Osmundales	Pteridophyta	Osmundales	Australia	Ipswich/Esk	Moombra School	-27.2392	152.42	City	Esk	Wandilla-Tablelands	Australia	240	101.663	-54.45	Australia	Esk Formation		19	lower Ladinian		Ladinian	40-50°S	20	1	warm_temperate		calculated	warm_temperate
771	643	255	105	Anderson & Anderson	2008		Nymbopteron	foleyi					Holmes, 2003			Nymbopteron	foleyi		Holmes, 2003	incertae sedis	Osmundales	Pteridophyta	Osmundales	Australia		Nymboida, Coal Mine area	-29.9009	152.704	Locality	Nymboida	Coffs-Harbour	Australia	240	101.545	-56.728	Australia	Basin Creek Formation		19	lower Ladinian		Ladinian	40-50°S	54	1	warm_temperate		calculated	warm_temperate
772	643	255	105	Anderson & Anderson	2008		Nymbopteron	rhomboidale					Holmes, 2003			Nymbopteron	rhomboidale		Holmes, 2003	incertae sedis	Osmundales	Pteridophyta	Osmundales	Australia		Nymboida, Coal Mine area	-29.9009	152.704	Locality	Nymboida	Coffs-Harbour	Australia	240	101.545	-56.728	Australia	Basin Creek Formation		19	lower Ladinian		Ladinian	40-50°S	54	1	warm_temperate		calculated	warm_temperate
773	643	255	105	Anderson & Anderson	2008		Nymbopteron	uncinatum					Holmes, 2003			Nymbopteron	uncinatum		Holmes, 2003	incertae sedis	Osmundales	Pteridophyta	Osmundales	Australia		Nymboida, Coal Mine area	-29.9009	152.704	Locality	Nymboida	Coffs-Harbour	Australia	240	101.545	-56.728	Australia	Basin Creek Formation		19	lower Ladinian		Ladinian	40-50°S	54	1	warm_temperate		calculated	warm_temperate
774	643	255	105	Anderson & Anderson	2008		Nymborhipteris	radiata					Holmes, 2003			Nymborhipteris	radiata		Holmes, 2003	incertae sedis	incertae sedis	Pteridophyta	Pteridophyta incertae sedis	Australia		Nymboida, Coal Mine area	-29.9009	152.704	Locality	Nymboida	Coffs-Harbour	Australia	240	101.545	-56.728	Australia	Basin Creek Formation		19	lower Ladinian		Ladinian	40-50°S	54	1	warm_temperate		calculated	warm_temperate
775	643	255	105	Anderson & Anderson	2008		Ogmos	adinus					Holmes, 2001			Ogmos	adinum		Webb, 1983	Marattiaceae	Marattiales	Pteridophyta	Marattiales	Australia		Nymboida, Coal Mine area	-29.9009	152.704	Locality	Nymboida	Coffs-Harbour	Australia	240	101.545	-56.728	Australia	Basin Creek Formation		19	lower Ladinian		Ladinian	40-50°S	54	1	warm_temperate		calculated	warm_temperate
776	1255	568	180	Anderson & Anderson	2008		Ogmos	adinus					Webb, 1983			Ogmos	adinum		Webb, 1983	Marattiaceae	Marattiales	Pteridophyta	Marattiales	Australia	Ipswich/Esk	Esk	-27.2392	152.42	Locality		Wandilla-Tablelands	Australia	240	101.663	-54.45	Australia	Esk Formation		19	lower Ladinian		Ladinian	40-50°S	20	1	warm_temperate		calculated	warm_temperate
777	904	330	154	Anderson & Anderson	2008		Ogmos	adinus					Webb, 1983			Ogmos	adinum		Webb, 1983	Marattiaceae	Marattiales	Pteridophyta	Marattiales	Australia	Ipswich/Esk	Wivenhoe Hill	-27.3717	152.535	Locality	Wivenhoe Hill	Wandilla-Tablelands	Australia	240	101.324	-54.197	Australia	Esk Formation		19	lower Ladinian		Ladinian	40-50°S	20	1	warm_temperate		calculated	warm_temperate
778	1847	432	195	Anderson & Anderson	2008		Osmunda	claytoniites					Taylor et al., 1990			Osmunda	claytoniites		Anderson et Anderson, 2008	Osmundaceae	Osmundales	Pteridophyta	Osmundales	Antarctica		Allan Hills	-76.7168	159.667	Locality		Mawson	East Antarctica	240	61.277	-72.598	Antarctica	Lashly C		22	upper Ladinian		Ladinian	60-70°S	2	1	cold_temperate		calculated	cold_temperate
779	1847	432	195	Anderson & Anderson	2008		Osmunda	claytoniites					Phipps et al., 1998			Osmunda	claytoniites		Anderson et Anderson, 2008	Osmundaceae	Osmundales	Pteridophyta	Osmundales	Antarctica		Allan Hills	-76.7168	159.667	Locality		Mawson	East Antarctica	240	61.277	-72.598	Antarctica	Lashly C		22	upper Ladinian		Ladinian	60-70°S	2	1	cold_temperate		calculated	cold_temperate
786	643	255	105	Anderson & Anderson	2008		Osmundopteris	scalaris					Holmes, 2001			Osmundopsis	scalaris		Holmes, 2001	Osmundaceae	Osmundales	Pteridophyta	Osmundales	Australia		Nymboida, Coal Mine area	-29.9009	152.704	Locality	Nymboida	Coffs-Harbour	Australia	240	101.545	-56.728	Australia	Basin Creek Formation		19	lower Ladinian		Ladinian	40-50°S	54	1	warm_temperate		calculated	warm_temperate
787	1849	749	196	Anderson & Anderson	2008		Osmundopsis		sp.							Osmundopsis		sp.		Osmundaceae	Osmundales	Pteridophyta	Osmundales	Antarctica	TA		-84.3333	166.417	Region		Mawson	East Antarctica	240	36.165	-76.301	Antarctica	lashly Formation		21	upper Ladinian		Ladinian	60-70°S	3	1	cold_temperate		calculated	cold_temperate
791	922	339	162	Anderson & Anderson	2008		Parsophyllum	africana								Parsorophyllum	africana		Anderson et Anderson, 2008	incertae sedis	Filicales	Pteridophyta	Filicales	India	PI	Parsora	23.2431	77.7967	Locality		Bundelkhand	India	250	12.983	-48.051	India	Parsora Formation		11	Spathian		Olenekian	30-40°N	2	1	warm_temperate		calculated	warm_temperate
794	1022	375	143	Anderson & Anderson	2008		Parsorophyllum	indicum					Lele, 1962			Parsorophyllum	indicum		Lele, 1969	incertae sedis	Filicales	Pteridophyta	Filicales	India		Kamtadand	24.5362	81.3037	Region	Rewa	Bundelkhand	India	240	21.144	-47.009	India	Parsora Formation		12	lower Anisian		Anisian	30-40°N	2	1	warm_temperate		calculated	warm_temperate
795	921	338	161	Anderson & Anderson	2008		Parsorophyllum	indicum					Lele, 1956			Parsorophyllum	indicum		Lele, 1969	incertae sedis	Filicales	Pteridophyta	Filicales	India		Parsora	23.2431	77.7967	Locality		Bundelkhand	India	240	16.78	-45.328	India	Parsora Formation		12	lower Anisian		Anisian	30-40°N	3	1	warm_temperate		calculated	warm_temperate
796	687	273	112	Anderson & Anderson	2008		Psilotonymba	curvinervia					Etheridge, 1895			Ptilotonymba	curvinervia		Holmes, 2003	incertae sedis	incertae sedis	Pteridophyta	Pteridophyta incertae sedis	Australia	Delungra	Warialda Creek	-29.5663	150.679	Locality		Woolomin-Texas	Australia	240	98.37	-56.353	Australia	Gunee beds		22	lower Ladinian		Ladinian	40-50°S	3	0.466667	warm_temperate	warm_temperate	calculated	warm_temperate
797	899	255	141	Anderson & Anderson	2008		Ptilotonymba	curvinervia					Retallack et al., 1977			Ptilotonymba	curvinervia		Holmes, 2003	incertae sedis	incertae sedis	Pteridophyta	Pteridophyta incertae sedis	Australia		Nymboida, UNEL 1564	-29.9009	152.704	Locality	Nymboida	Coffs-Harbour	Australia	240	101.545	-56.728	Australia	Basin Creek Formation		19	lower Ladinian		Ladinian	40-50°S	54	1	warm_temperate		calculated	warm_temperate
798	643	255	105	Anderson & Anderson	2008		Ptilotonymba	curvinervis					Holmes, 2003			Ptilotonymba	curvinervia		Holmes, 2003	incertae sedis	incertae sedis	Pteridophyta	Pteridophyta incertae sedis	Australia		Nymboida, Coal Mine area	-29.9009	152.704	Locality	Nymboida	Coffs-Harbour	Australia	240	101.545	-56.728	Australia	Basin Creek Formation		19	lower Ladinian		Ladinian	40-50°S	54	1	warm_temperate		calculated	warm_temperate
799	643	255	105	Anderson & Anderson	2008		Rhipidopsis	walkomii					Holmes, 2001			Rhipidopsis	walkomii			incertae sedis	Cycadales	Cycadophyta	Cycadales	Australia		Nymboida, Coal Mine area	-29.9009	152.704	Locality	Nymboida	Coffs-Harbour	Australia	240	101.545	-56.728	Australia	Basin Creek Formation		19	lower Ladinian		Ladinian	40-50°S	54	1	warm_temperate		calculated	warm_temperate
800	2121	672	198	Anderson & Anderson	2008		Rienitsia	spathulata					Walkom, 1932			Rienitsia	spatulata		Walkom, 1932	Asterothecaceae	Marattiales	Pteridophyta	Marattiales	Australia	Blue Mts	Clarence Siding	-33.405	150.305	Locality		Sydney Basin	Australia	240	97.458	-60.175	Australia	?		18	upper Anisian		Anisian	50-60°S	1			warm_temperate	manual	warm_temperate
809	1648	749	189	Anderson & Anderson	2008		Scolecopteris	antarctica					Deleovoryas et al., 1992			Scolecopteris	antarctica		Delevoryas et al., 1994	Marattiaceae	Marattiales	Pteridophyta	Marattiales	Antarctica		Fremouw Peak	-84.2833	164.333	Locality		Mawson	East Antarctica	240	36.165	-76.301	Antarctica	Fremouw Formation		19	lower Ladinian		Ladinian	60-70°S	3	1	cold_temperate		calculated	cold_temperate
810	644	256	107	Anderson & Anderson	2008		Sphenopteris		sp.				Playford et al., 1982			Sphenopteris		sp.		Sphenopteridaceae	incertae sedis	Pteridophylla	Pteridophylla incertae sedis	Australia	Bowen Basin	Spring Creek	-33.3535	149.102	Locality		Molong	Australia	240	95.451	-60.067	Australia	Moolayember Formation		19	lower Ladinian		Ladinian	50-60°S	4	0.2875		warm_temperate	manual	warm_temperate
811	905	331	155	Anderson & Anderson	2008		Sphenopteris		sp.				Holmes & Ash, 1979			Sphenopteris		sp.		Sphenopteridaceae	incertae sedis	Pteridophylla	Pteridophylla incertae sedis	Australia	Lorne Basin	Grants Head	-31.6005	152.847	Locality	Grants Head	Nambucca	Australia	240	101.751	-58.428	Australia	Camden Head Claystone		22	lower Ladinian		Ladinian	40-50°S	2	0.225		warm_temperate	manual	warm_temperate
813	933	343	163	Anderson & Anderson	2008		Sphenopteris		sp.				Retallack, 1985			Sphenopteris		sp.		Sphenopteridaceae	incertae sedis	Pteridophylla	Pteridophylla incertae sedis	New Zealand		Ben Callum	-45.9167	168.484	Locality		Brook-Mihiriku	Lord Howe-New Zealand	240	-171.078	-28.644	New Zealand	Murihiku Supergroup		21	upper Ladinian		Ladinian	10-20°N	4	0.225		warm_temperate	manual	warm_temperate
814	2179	696	200	Anderson & Anderson	2008		Sphenopteris		sp.				Retallack, 1985			Sphenopteris		sp.		Sphenopteridaceae	incertae sedis	Pteridophylla	Pteridophylla incertae sedis	New Zealand		Mataura Island	-46.4273	168.783	Island		Brook-Mihiriku	Lord Howe-New Zealand	240	-170.553	-28.947	New Zealand	Murihiku Supergroup		21	upper Ladinian		Ladinian	10-20°N	4	0.225		warm_temperate	manual	warm_temperate
815	976	358	132	Anderson & Anderson	2008		Sphenopteris		sp.				Retallack, 1980			Sphenopteris		sp.		Sphenopteridaceae	incertae sedis	Pteridophylla	Pteridophylla incertae sedis	New Zealand		Tank Gully	-43.7557	171.162	(Locality)	Canterbury	Caples-Haast-Torlesse	Lord Howe-New Zealand	240	-170.65	-25.793	New Zealand	Tank Gully CM		21	upper Ladinian		Ladinian	10-20°N	3	1	warm_temperate		calculated	warm_temperate
816	909	259	159	Anderson & Anderson	2008		Sphenopters		sp.				Walkom, 1925			Sphenopteris		sp.		Sphenopteridaceae	incertae sedis	Pteridophylla	Pteridophylla incertae sedis	Australia	Sydney	Turrimetta Head	-33.6962	151.315	Locality		Sydney Basin	Australia	250	105.746	-65.772	Australia	Gosford Fm.		9	Spathian		Olenekian	50-60°S	13	0.398718	warm_temperate	warm_temperate	calculated	warm_temperate
817	643	255	105	Anderson & Anderson	2008		Sphenopteris	speciosa					Holmes, 2003			Sphenopteris	speciosa		Holmes, 2003	Sphenopteridaceae	incertae sedis	Pteridophylla	Pteridophylla incertae sedis	Australia		Nymboida, Coal Mine area	-29.9009	152.704	Locality	Nymboida	Coffs-Harbour	Australia	240	101.545	-56.728	Australia	Basin Creek Formation		19	lower Ladinian		Ladinian	40-50°S	54	1	warm_temperate		calculated	warm_temperate
821	650	711	113	Anderson & Anderson	2008		Strombergia		sp.							Strombergia		sp.		incertae sedis	Osmundales	Pteridophyta	Osmundales	Australia	Sydney	Brookvale	-33.765	151.27	Locality	Brookvale	Sydney Basin	Australia	240	99.054	-60.567	Australia	Hawkesbury Sandstone		17	upper Anisian		Anisian	50-60°S	6	1	warm_temperate		calculated	warm_temperate
824	934	344	126	Anderson & Anderson	2008		Todites	maoricus					Retallack, 1981			Todites	maoricus		Burges, 1935	Osmundaceae	Osmundales	Pteridophyta	Osmundales	New Zealand		Benmore Dam	-44.4217	170.22	Locality		Caples-Haast-Torlesse	Lord Howe-New Zealand	240	-170.876	-26.721	New Zealand	Black jack Conglomerate		21	upper Ladinian		Ladinian	10-20°N	3	0.244444		warm_temperate	manual	warm_temperate
825	935	345	201	Anderson & Anderson	2008		Todites	maoricus					Retallack, 1981			Todites	maoricus		Burges, 1935	Osmundaceae	Osmundales	Pteridophyta	Osmundales	New Zealand		Long Gully	-41.3147	174.727	Locality	Long Gully Station	Pahau	Lord Howe-New Zealand	240	-172.739	-27.477	New Zealand	Long Gully Formation		21	upper Ladinian		Ladinian	10-20°N	2	0.266667		warm_temperate	manual	warm_temperate
826	643	255	105	Anderson & Anderson	2008		Todites	parvum					Holmes, 2001			Todites	parvum		Holmes, 2001	Osmundaceae	Osmundales	Pteridophyta	Osmundales	Australia		Nymboida, Coal Mine area	-29.9009	152.704	Locality	Nymboida	Coffs-Harbour	Australia	240	101.545	-56.728	Australia	Basin Creek Formation		19	lower Ladinian		Ladinian	40-50°S	54	1	warm_temperate		calculated	warm_temperate
827	901	327	150	Anderson & Anderson	2008	cf.	Todites	pattinsoniorum					Dun, 1909		cf.	Todites	pattinsoniorum			Osmundaceae	Osmundales	Pteridophyta	Osmundales	Australia	Dubbo	Benolong	-32.4312	148.7	Locality	Benolong	Molong	Australia	240	94.909	-59.124	Australia	Napperby Formation		18	upper Anisian		Anisian	40-50°S	3	0.3		warm_temperate	manual	warm_temperate
828	909	259	159	Anderson & Anderson	2008		Todites		sp.				Walkom, 1925			Todites		sp.		Osmundaceae	Osmundales	Pteridophyta	Osmundales	Australia	Sydney	Turrimetta Head	-33.6962	151.315	Locality		Sydney Basin	Australia	250	105.746	-65.772	Australia	Gosford Fm.		9	Spathian		Olenekian	50-60°S	13	0.398718	warm_temperate	warm_temperate	calculated	warm_temperate
829	646	330	108	Anderson & Anderson	2008		Todites	williamsonii								Todites	williamsonii		(Brongniart, 1828) Hill et al., 1965	Osmundaceae	Osmundales	Pteridophyta	Osmundales	Australia	Ipswich/Esk	Wivenhoe	-27.3717	152.535	Locality	Wivenhoe Hill	Wandilla-Tablelands	Australia	240	101.324	-54.197	Australia	Esk Formation		19	lower Ladinian		Ladinian	40-50°S	20	1	warm_temperate		calculated	warm_temperate
872	90	223	222	Arndt	2002		Hercynostrobus	digitatus			Pl. 5, fig.4, 6-7,pl. 6, Fig. 1-4			Richter, P.B.		Hercynostrobus	digitatus		Arndt, 2002	incertae sedis	incertae sedis	Coniferophyta	Coniferophyta incertae sedis	Germany		Thale	51.7474	11.0414	Locality	Thale am Harz	Harz-Giessen	Anglo-Saxonia	240	-4.931	23.643	Europe	Lettenkohle		S114484	Upper Ladinian		Ladinian	30-40°N	828	1	tropical_summerwet		calculated	tropical_summerwet
873	90	223	223	Arndt	2002		Hercynostrobus	digitatus		Arndt, 2002						Hercynostrobus	digitatus		Arndt, 2002	incertae sedis	incertae sedis	Coniferophyta	Coniferophyta incertae sedis	Germany		Thale	51.7474	11.0414	Locality	Thale am Harz	Harz-Giessen	Anglo-Saxonia	240	-4.931	23.643	Europe	Unterer Keuper			Ladinian		Ladinian	30-40°N	828	1	tropical_summerwet		calculated	tropical_summerwet
875	528	421	224	Arndt	2002		Rhuelostachys	pseudoarticulatus		Roselt, 1955-56						Ruehleostachys	pseudoarticulatus		Roselt, 1955-56	Voltziaceae	Voltziales	Coniferophyta	Voltziales	Germany		Irmelshausen	50.3644	10.471	Locality		Saxo-Thuringian	Anglo-Saxonia	240	-4.654	22.237	Europe	Unterer Keuper			Ladinian		Ladinian	30-40°N	660	1	tropical_summerwet		calculated	tropical_summerwet
876	175	32	225	Arndt	2002		Rhuelostachys	pseudoarticulatus		Roselt, 1955-56						Ruehleostachys	pseudoarticulatus		Roselt, 1955-56	Voltziaceae	Voltziales	Coniferophyta	Voltziales	Germany	Thüringen	Bedheim	50.3902	10.6547	Locality	Bedheim	Saxo-Thuringian	Anglo-Saxonia	240	-4.55	22.309	Europe	Unterer Keuper			Ladinian		Ladinian	30-40°N	923	1	tropical_summerwet		calculated	tropical_summerwet
879	2338	441	227	Arndt	2002		Voltzia	heterophylla		(Brongniart) Schimper et Mougeot						Voltzia	heterophylla		Brongniart, 1828	Voltziaceae	Voltziales	Coniferophyta	Voltziales	Germany		Fürstenberg	51.7286	9.40311	Locality		South-West Avalonia	Anglo-Saxonia	240	-5.928	23.203	Europe	Buntsandstein			lower Anisian		Anisian	30-40°N	12	0.333333	tropical_summerwet	tropical_summerwet	calculated	tropical_summerwet
897	1098	394	233	Artabe & Brea	2003		Cuneumxylon	spallettii		Artabe et Brea, 2004	Fig. 2-5					Cuneumxylon	spallettii		Artabe et Brea, 2003	Corystospermaceae	Corystospermales	Pteridospermatophyta	Corystospermales	Argentina	Mendoza Province	Aqua de la Zorra, Uspallata	-32.6257	-69.3284	Area	Uspallata	Cuyana	Pampia	240	-74.012	-42.398	South America	Paramillo Formation	lower part, strata 4	LPPB12690	Ladinian	oldest biozone of the Cortaderitian stage (Yabeiella mareyesiaca-Scytophyllum-bonettiae-Protocircoporoxylon cortaderitaensis Assmeblage biozone)	Ladinian	30-40°N	22	0.504762	warm_temperate	warm_temperate	calculated	warm_temperate
930	562	394	251	Artabe et al.	2001		Araucarioxylon	protoaraucana				4		paleocomunidad 4: estrato fosilifero III and IV de perfil A in El Sauce, level V in the perfil B of Darwin and level VI of El Portezuelo locality sensu Brea, 1995)		Araucarioxylon	protoaraucana		Brea, 1997	Araucariaceae	Coniferales	Coniferophyta	Coniferales	Argentina	Mendoza Province	Agua de la Zorra, 24 km NO of Uspallata	-32.6257	-69.3284	City	Uspallata	Cuyana	Pampia	240	-74.012	-42.398	South America	Potrerillos Formation	lower section		lower Ladinian	Biozona de Yabeiella mareyesiaca, Scytophyllum benettiae, Protocircoporoxylon (=Protophyllocladoxylon) cortaderitaensis (MBC)	Ladinian	30-40°N	22	0.504762	warm_temperate	warm_temperate	calculated	warm_temperate
940	713	278	255	Artabe et al.	2001		Baiera	cuyana				1		Paleocomunidad 1: NF1/ punto 11 in Stipanicic & Menendez, 1949, pl. 10, fig. 1; Bonetti, 1963, 1968, 1972; Stipanicic & Bonetti, 1965		Baiera	cuyana		Frenguelli, 1942	incertae sedis	Ginkgoales	Ginkgophyta	Ginkgoales	Argentina	San Juan Province	Barreal, Cuenca Cuyana	-31.6348	-69.4754	Locality	Barreal	East Chilenia	Southern Andes	240	-74.045	-41.399	South America	Barreal Formation	fine sandstone and limolites of light color		Anisian	Biozona de Dictyophyllum castellanosii, Johnstonia stelzneria, Saportaea dichotoma (CSD)	Anisian	30-40°N	25	0.472222	warm_temperate	warm_temperate	calculated	warm_temperate
945	713	278	255	Artabe et al.	2001		Chiropteris	barrealensis				2		Paleocomunidad 1: NF1/ punto 11 in Stipanicic & Menendez, 1949, pl. 10, fig. 1; Bonetti, 1963, 1968, 1972; Stipanicic & Bonetti, 1965		Chiropteris	barrealensis		Frenguelli	incertae sedis	incertae sedis	Pteridophyta	Pteridophyta incertae sedis	Argentina	San Juan Province	Barreal, Cuenca Cuyana	-31.6348	-69.4754	Locality	Barreal	East Chilenia	Southern Andes	240	-74.045	-41.399	South America	Barreal Formation	fine sandstone and limolites of light color		Anisian	Biozona de Dictyophyllum castellanosii, Johnstonia stelzneria, Saportaea dichotoma (CSD)	Anisian	30-40°N	25	0.472222	warm_temperate	warm_temperate	calculated	warm_temperate
946	713	278	255	Artabe et al.	2001		Chiropteris	zeilleri				1		Paleocomunidad 1: NF1/ punto 11 in Stipanicic & Menendez, 1949, pl. 10, fig. 1; Bonetti, 1963, 1968, 1972; Stipanicic & Bonetti, 1965		Chiropteris	zeilleri		Seward	incertae sedis	incertae sedis	Pteridophyta	Pteridophyta incertae sedis	Argentina	San Juan Province	Barreal, Cuenca Cuyana	-31.6348	-69.4754	Locality	Barreal	East Chilenia	Southern Andes	240	-74.045	-41.399	South America	Barreal Formation	fine sandstone and limolites of light color		Anisian	Biozona de Dictyophyllum castellanosii, Johnstonia stelzneria, Saportaea dichotoma (CSD)	Anisian	30-40°N	25	0.472222	warm_temperate	warm_temperate	calculated	warm_temperate
956	562	394	251	Artabe et al.	2001		Cladophlebis	kurtzi				4		paleocomunidad 4: estrato fosilifero III and IV de perfil A in El Sauce, level V in the perfil B of Darwin and level VI of El Portezuelo locality sensu Brea, 1995)		Cladophlebis	kurtzii		Frenguelli, 1947	Osmundaceae	Osmundales	Pteridophyta	Osmundales	Argentina	Mendoza Province	Agua de la Zorra, 24 km NO of Uspallata	-32.6257	-69.3284	City	Uspallata	Cuyana	Pampia	240	-74.012	-42.398	South America	Potrerillos Formation	lower section		lower Ladinian	Biozona de Yabeiella mareyesiaca, Scytophyllum benettiae, Protocircoporoxylon (=Protophyllocladoxylon) cortaderitaensis (MBC)	Ladinian	30-40°N	22	0.504762	warm_temperate	warm_temperate	calculated	warm_temperate
959	992	367	259	Artabe et al.	2001		Cladophlebis	mendozaensis				2		paleocomunidad 9: section inferior, NF2 sensu Ganuza et al., 1998		Cladophlebis	mendozaensis		(Geinitz, 1876) Frenguelli, 1947	Osmundaceae	Osmundales	Pteridophyta	Osmundales	Argentina		Agua de los Pajaritos	-31.4854	-69.4036	City	Hilario	Rio de la Plata	Pampia	240	-68.083	-48.583	South America	El Alcazar Formation			lower Ladinian	Biozona de Yabeiella mareyesiaca, Scytophyllum benettiae, Protocircoporoxylon (=Protophyllocladoxylon) cortaderitaensis (MBC)	Ladinian	30-40°N	21	1	warm_temperate	warm_temperate	calculated	warm_temperate
964	562	394	251	Artabe et al.	2001		Cladophlebis	mendozaensis				4		paleocomunidad 4: estrato fosilifero III and IV de perfil A in El Sauce, level V in the perfil B of Darwin and level VI of El Portezuelo locality sensu Brea, 1995)		Cladophlebis	mendozaensis		(Geinitz, 1876) Frenguelli, 1947	Osmundaceae	Osmundales	Pteridophyta	Osmundales	Argentina	Mendoza Province	Agua de la Zorra, 24 km NO of Uspallata	-32.6257	-69.3284	City	Uspallata	Cuyana	Pampia	240	-74.012	-42.398	South America	Potrerillos Formation	lower section		lower Ladinian	Biozona de Yabeiella mareyesiaca, Scytophyllum benettiae, Protocircoporoxylon (=Protophyllocladoxylon) cortaderitaensis (MBC)	Ladinian	30-40°N	22	0.504762	warm_temperate	warm_temperate	calculated	warm_temperate
966	992	367	259	Artabe et al.	2001		Cladophlebis	mesozoica				2		paleocomunidad 9: section inferior, NF2 sensu Ganuza et al., 1998		Cladophlebis	mesozoica		Kurtz ex Frenguelli, 1947	Osmundaceae	Osmundales	Pteridophyta	Osmundales	Argentina		Agua de los Pajaritos	-31.4854	-69.4036	City	Hilario	Rio de la Plata	Pampia	240	-68.083	-48.583	South America	El Alcazar Formation			lower Ladinian	Biozona de Yabeiella mareyesiaca, Scytophyllum benettiae, Protocircoporoxylon (=Protophyllocladoxylon) cortaderitaensis (MBC)	Ladinian	30-40°N	21	1	warm_temperate	warm_temperate	calculated	warm_temperate
968	562	394	251	Artabe et al.	2001		Cladophlebis	mesozoica				4		paleocomunidad 4: estrato fosilifero III and IV de perfil A in El Sauce, level V in the perfil B of Darwin and level VI of El Portezuelo locality sensu Brea, 1995)		Cladophlebis	mesozoica		Kurtz ex Frenguelli, 1947	Osmundaceae	Osmundales	Pteridophyta	Osmundales	Argentina	Mendoza Province	Agua de la Zorra, 24 km NO of Uspallata	-32.6257	-69.3284	City	Uspallata	Cuyana	Pampia	240	-74.012	-42.398	South America	Potrerillos Formation	lower section		lower Ladinian	Biozona de Yabeiella mareyesiaca, Scytophyllum benettiae, Protocircoporoxylon (=Protophyllocladoxylon) cortaderitaensis (MBC)	Ladinian	30-40°N	22	0.504762	warm_temperate	warm_temperate	calculated	warm_temperate
972	896	367	262	Artabe et al.	2001		Cladophlebis		sp.			2		paleocomunidad 7: section inferior, NF2 and NF3 sensu Zamuner et al., 1999		Cladophlebis		sp.		Osmundaceae	Osmundales	Pteridophyta	Osmundales	Argentina		Cortaderita, Mona Don Francisco	-31.6348	-69.4754	City	Barreal	Rio de la Plata	Pampia	240	-68.083	-48.583	South America	Cortaderita Formation			lower Ladinian	Biozona de Yabeiella mareyesiaca, Scytophyllum benettiae, Protocircoporoxylon (=Protophyllocladoxylon) cortaderitaensis (MBC)	Ladinian	30-40°N	21	1	warm_temperate	warm_temperate	calculated	warm_temperate
974	562	394	251	Artabe et al.	2001		Cladophlebis		sp.			4		paleocomunidad 4: estrato fosilifero III and IV de perfil A in El Sauce, level V in the perfil B of Darwin and level VI of El Portezuelo locality sensu Brea, 1995)		Cladophlebis		sp.		Osmundaceae	Osmundales	Pteridophyta	Osmundales	Argentina	Mendoza Province	Agua de la Zorra, 24 km NO of Uspallata	-32.6257	-69.3284	City	Uspallata	Cuyana	Pampia	240	-74.012	-42.398	South America	Potrerillos Formation	lower section		lower Ladinian	Biozona de Yabeiella mareyesiaca, Scytophyllum benettiae, Protocircoporoxylon (=Protophyllocladoxylon) cortaderitaensis (MBC)	Ladinian	30-40°N	22	0.504762	warm_temperate	warm_temperate	calculated	warm_temperate
976	713	278	255	Artabe et al.	2001		Coniopteris	harringtoni				1		Paleocomunidad 1: NF1/ punto 11 in Stipanicic & Menendez, 1949, pl. 10, fig. 1; Bonetti, 1963, 1968, 1972; Stipanicic & Bonetti, 1965		Coniopteris	harringtoni		Frenguelli, 1950	Dicksoniaceae	Filicales	Pteridophyta	Filicales	Argentina	San Juan Province	Barreal, Cuenca Cuyana	-31.6348	-69.4754	Locality	Barreal	East Chilenia	Southern Andes	240	-74.045	-41.399	South America	Barreal Formation	fine sandstone and limolites of light color		Anisian	Biozona de Dictyophyllum castellanosii, Johnstonia stelzneria, Saportaea dichotoma (CSD)	Anisian	30-40°N	25	0.472222	warm_temperate	warm_temperate	calculated	warm_temperate
977	713	278	255	Artabe et al.	2001		Coniopteris	walkomi				1		Paleocomunidad 1: NF1/ punto 11 in Stipanicic & Menendez, 1949, pl. 10, fig. 1; Bonetti, 1963, 1968, 1972; Stipanicic & Bonetti, 1965		Coniopteris	walkomi		Frenguelli	Dicksoniaceae	Filicales	Pteridophyta	Filicales	Argentina	San Juan Province	Barreal, Cuenca Cuyana	-31.6348	-69.4754	Locality	Barreal	East Chilenia	Southern Andes	240	-74.045	-41.399	South America	Barreal Formation	fine sandstone and limolites of light color		Anisian	Biozona de Dictyophyllum castellanosii, Johnstonia stelzneria, Saportaea dichotoma (CSD)	Anisian	30-40°N	25	0.472222	warm_temperate	warm_temperate	calculated	warm_temperate
985	562	394	251	Artabe et al.	2001		Cuneumxylon	spallettii				4		paleocomunidad 4: estrato fosilifero III and IV de perfil A in El Sauce, level V in the perfil B of Darwin and level VI of El Portezuelo locality sensu Brea, 1995)		Cuneumxylon	spallettii		Artabe et Brea, 2003	Corystospermaceae	Corystospermales	Pteridospermatophyta	Corystospermales	Argentina	Mendoza Province	Agua de la Zorra, 24 km NO of Uspallata	-32.6257	-69.3284	City	Uspallata	Cuyana	Pampia	240	-74.012	-42.398	South America	Potrerillos Formation	lower section		lower Ladinian	Biozona de Yabeiella mareyesiaca, Scytophyllum benettiae, Protocircoporoxylon (=Protophyllocladoxylon) cortaderitaensis (MBC)	Ladinian	30-40°N	22	0.504762	warm_temperate	warm_temperate	calculated	warm_temperate
994	713	278	255	Artabe et al.	2001		Zuberia	barrealensis				1		Paleocomunidad 1: NF1/ punto 11 in Stipanicic & Menendez, 1949, pl. 10, fig. 1; Bonetti, 1963, 1968, 1972; Stipanicic & Bonetti, 1965		Dicroidium	barrealensis		Frenguelli, 1943	Corystospermaceae	Corystospermales	Pteridospermatophyta	Corystospermales	Argentina	San Juan Province	Barreal, Cuenca Cuyana	-31.6348	-69.4754	Locality	Barreal	East Chilenia	Southern Andes	240	-74.045	-41.399	South America	Barreal Formation	fine sandstone and limolites of light color		Anisian	Biozona de Dictyophyllum castellanosii, Johnstonia stelzneria, Saportaea dichotoma (CSD)	Anisian	30-40°N	25	0.472222	warm_temperate	warm_temperate	calculated	warm_temperate
1000	713	278	255	Artabe et al.	2001		Johnstonia	coriacea				1		Paleocomunidad 1: NF1/ punto 11 in Stipanicic & Menendez, 1949, pl. 10, fig. 1; Bonetti, 1963, 1968, 1972; Stipanicic & Bonetti, 1965		Dicroidium	coriaceum		(Johnston) Townrow	Corystospermaceae	Corystospermales	Pteridospermatophyta	Corystospermales	Argentina	San Juan Province	Barreal, Cuenca Cuyana	-31.6348	-69.4754	Locality	Barreal	East Chilenia	Southern Andes	240	-74.045	-41.399	South America	Barreal Formation	fine sandstone and limolites of light color		Anisian	Biozona de Dictyophyllum castellanosii, Johnstonia stelzneria, Saportaea dichotoma (CSD)	Anisian	30-40°N	25	0.472222	warm_temperate	warm_temperate	calculated	warm_temperate
1001	1192	427	265	Artabe et al.	2001		Johnstonia	coriacea				3	Zamunet et al., 1998	Paleocomunidad 2		Dicroidium	coriaceum		(Johnston) Townrow	Corystospermaceae	Corystospermales	Pteridospermatophyta	Corystospermales	Argentina	San Juan-la Rioja provinces	Cuenca de Ischigualasto-Villa Unión	-30.1635	-67.8423	Area	Ischigualasto	Famatina-Puna	Pampia	240	-72.019	-40.068	South America	Ischichuca Formation	II sequence	300 m from the base	Anisian	Biozona de Dictyophyllum castellanosii, Johnstonia stelzneria, Saportaea dichotoma (CSD)	Anisian	30-40°N	12	1	warm_temperate		calculated	warm_temperate
1010	1192	427	266	Artabe et al.	2001		Dicroidium	dubium				2	Zamunet et al., 1998	Paleocomunidad 2		Dicroidium	dubium		(Feistmantel) Gothan, 1912	Corystospermaceae	Corystospermales	Pteridospermatophyta	Corystospermales	Argentina	San Juan-la Rioja provinces	Cuenca de Ischigualasto-Villa Unión	-30.1635	-67.8423	Area	Ischigualasto	Famatina-Puna	Pampia	240	-72.019	-40.068	South America	Ischichuca Formation	III sequence	440 m from the base	Anisian	Biozona de Dictyophyllum castellanosii, Johnstonia stelzneria, Saportaea dichotoma (CSD)	Anisian	30-40°N	12	1	warm_temperate		calculated	warm_temperate
1018	1192	427	265	Artabe et al.	2001		Xylopteris	elongata				1	Zamunet et al., 1998	Paleocomunidad 2		Dicroidium	elongatum		(Carruthers) Archangelsky, 1968	Corystospermaceae	Corystospermales	Pteridospermatophyta	Corystospermales	Argentina	San Juan-la Rioja provinces	Cuenca de Ischigualasto-Villa Unión	-30.1635	-67.8423	Area	Ischigualasto	Famatina-Puna	Pampia	240	-72.019	-40.068	South America	Ischichuca Formation	II sequence	300 m from the base	Anisian	Biozona de Dictyophyllum castellanosii, Johnstonia stelzneria, Saportaea dichotoma (CSD)	Anisian	30-40°N	12	1	warm_temperate		calculated	warm_temperate
1041	1192	427	265	Artabe et al.	2001		Dicroidium	pinnis-distantibus				1	Zamunet et al., 1998	Paleocomunidad 2		Dicroidium	pinnis-distantibus		(Kurtz) Frenguelli	Corystospermaceae	Corystospermales	Pteridospermatophyta	Corystospermales	Argentina	San Juan-la Rioja provinces	Cuenca de Ischigualasto-Villa Unión	-30.1635	-67.8423	Area	Ischigualasto	Famatina-Puna	Pampia	240	-72.019	-40.068	South America	Ischichuca Formation	II sequence	300 m from the base	Anisian	Biozona de Dictyophyllum castellanosii, Johnstonia stelzneria, Saportaea dichotoma (CSD)	Anisian	30-40°N	12	1	warm_temperate		calculated	warm_temperate
1042	1192	427	266	Artabe et al.	2001		Dicroidium		sp.			2	Zamunet et al., 1998	Paleocomunidad 2		Dicroidium		sp.		Corystospermaceae	Corystospermales	Pteridospermatophyta	Corystospermales	Argentina	San Juan-la Rioja provinces	Cuenca de Ischigualasto-Villa Unión	-30.1635	-67.8423	Area	Ischigualasto	Famatina-Puna	Pampia	240	-72.019	-40.068	South America	Ischichuca Formation	III sequence	440 m from the base	Anisian	Biozona de Dictyophyllum castellanosii, Johnstonia stelzneria, Saportaea dichotoma (CSD)	Anisian	30-40°N	12	1	warm_temperate		calculated	warm_temperate
1043	713	278	255	Artabe et al.	2001		Dictyophyllum	barrealensis				1		Paleocomunidad 1: NF1/ punto 11 in Stipanicic & Menendez, 1949, pl. 10, fig. 1; Bonetti, 1963, 1968, 1972; Stipanicic & Bonetti, 1965		Dictyophyllum	barrealensis		Stipanicic et Menéndez, 1949	Dipteridaceae	Filicales	Pteridophyta	Filicales	Argentina	San Juan Province	Barreal, Cuenca Cuyana	-31.6348	-69.4754	Locality	Barreal	East Chilenia	Southern Andes	240	-74.045	-41.399	South America	Barreal Formation	fine sandstone and limolites of light color		Anisian	Biozona de Dictyophyllum castellanosii, Johnstonia stelzneria, Saportaea dichotoma (CSD)	Anisian	30-40°N	25	0.472222	warm_temperate	warm_temperate	calculated	warm_temperate
1044	713	278	255	Artabe et al.	2001		Dictyophyllum	castellanosii				1		Paleocomunidad 1: NF1/ punto 11 in Stipanicic & Menendez, 1949, pl. 10, fig. 1; Bonetti, 1963, 1968, 1972; Stipanicic & Bonetti, 1965		Dictyophyllum	castellanosii		Stipanicic et Menéndez, 1949	Dipteridaceae	Filicales	Pteridophyta	Filicales	Argentina	San Juan Province	Barreal, Cuenca Cuyana	-31.6348	-69.4754	Locality	Barreal	East Chilenia	Southern Andes	240	-74.045	-41.399	South America	Barreal Formation	fine sandstone and limolites of light color		Anisian	Biozona de Dictyophyllum castellanosii, Johnstonia stelzneria, Saportaea dichotoma (CSD)	Anisian	30-40°N	25	0.472222	warm_temperate	warm_temperate	calculated	warm_temperate
1052	1192	427	265	Artabe et al.	2001		Dordrechtites		sp.			2	Zamunet et al., 1998	Paleocomunidad 2		Dordrechtites		sp.		incertae sedis	incertae sedis	Gymnospermae	Dordrechtiales	Argentina	San Juan-la Rioja provinces	Cuenca de Ischigualasto-Villa Unión	-30.1635	-67.8423	Area	Ischigualasto	Famatina-Puna	Pampia	240	-72.019	-40.068	South America	Ischichuca Formation	II sequence	300 m from the base	Anisian	Biozona de Dictyophyllum castellanosii, Johnstonia stelzneria, Saportaea dichotoma (CSD)	Anisian	30-40°N	12	1	warm_temperate		calculated	warm_temperate
1071	713	278	255	Artabe et al.	2001		Hausmannia	dentata				1		Paleocomunidad 1: NF1/ punto 11 in Stipanicic & Menendez, 1949, pl. 10, fig. 1; Bonetti, 1963, 1968, 1972; Stipanicic & Bonetti, 1965		Hausmannia	dentata		Oishi	Dipteridaceae	Filicales	Pteridophyta	Filicales	Argentina	San Juan Province	Barreal, Cuenca Cuyana	-31.6348	-69.4754	Locality	Barreal	East Chilenia	Southern Andes	240	-74.045	-41.399	South America	Barreal Formation	fine sandstone and limolites of light color		Anisian	Biozona de Dictyophyllum castellanosii, Johnstonia stelzneria, Saportaea dichotoma (CSD)	Anisian	30-40°N	25	0.472222	warm_temperate	warm_temperate	calculated	warm_temperate
1072	713	278	255	Artabe et al.	2001		Hausmannia	faltisiana				1		Paleocomunidad 1: NF1/ punto 11 in Stipanicic & Menendez, 1949, pl. 10, fig. 1; Bonetti, 1963, 1968, 1972; Stipanicic & Bonetti, 1965		Hausmannia	faltisiana		Stipanicic et Menéndez, 1949	Dipteridaceae	Filicales	Pteridophyta	Filicales	Argentina	San Juan Province	Barreal, Cuenca Cuyana	-31.6348	-69.4754	Locality	Barreal	East Chilenia	Southern Andes	240	-74.045	-41.399	South America	Barreal Formation	fine sandstone and limolites of light color		Anisian	Biozona de Dictyophyllum castellanosii, Johnstonia stelzneria, Saportaea dichotoma (CSD)	Anisian	30-40°N	25	0.472222	warm_temperate	warm_temperate	calculated	warm_temperate
1075	992	367	259	Artabe et al.	2001		Heidiphyllum	elongatum				1		paleocomunidad 9: section inferior, NF2 sensu Ganuza et al., 1998		Heidiphyllum	elongatum		(Morris) Retallack	incertae sedis	Voltziales	Coniferophyta	Voltziales	Argentina		Agua de los Pajaritos	-31.4854	-69.4036	City	Hilario	Rio de la Plata	Pampia	240	-68.083	-48.583	South America	El Alcazar Formation			lower Ladinian	Biozona de Yabeiella mareyesiaca, Scytophyllum benettiae, Protocircoporoxylon (=Protophyllocladoxylon) cortaderitaensis (MBC)	Ladinian	30-40°N	21	1	warm_temperate	warm_temperate	calculated	warm_temperate
1087	1192	427	265	Artabe et al.	2001		Heidiphyllum	elongatum				4	Zamunet et al., 1998	Paleocomunidad 2		Heidiphyllum	elongatum		(Morris) Retallack	incertae sedis	Voltziales	Coniferophyta	Voltziales	Argentina	San Juan-la Rioja provinces	Cuenca de Ischigualasto-Villa Unión	-30.1635	-67.8423	Area	Ischigualasto	Famatina-Puna	Pampia	240	-72.019	-40.068	South America	Ischichuca Formation	II sequence	300 m from the base	Anisian	Biozona de Dictyophyllum castellanosii, Johnstonia stelzneria, Saportaea dichotoma (CSD)	Anisian	30-40°N	12	1	warm_temperate		calculated	warm_temperate
1088	1192	427	266	Artabe et al.	2001		Heidiphyllum	elongatum				2	Zamunet et al., 1998	Paleocomunidad 2		Heidiphyllum	elongatum		(Morris) Retallack	incertae sedis	Voltziales	Coniferophyta	Voltziales	Argentina	San Juan-la Rioja provinces	Cuenca de Ischigualasto-Villa Unión	-30.1635	-67.8423	Area	Ischigualasto	Famatina-Puna	Pampia	240	-72.019	-40.068	South America	Ischichuca Formation	III sequence	440 m from the base	Anisian	Biozona de Dictyophyllum castellanosii, Johnstonia stelzneria, Saportaea dichotoma (CSD)	Anisian	30-40°N	12	1	warm_temperate		calculated	warm_temperate
1094	713	278	255	Artabe et al.	2001		Johnstonia	stelzneriana				4		Paleocomunidad 1: NF1/ punto 11 in Stipanicic & Menendez, 1949, pl. 10, fig. 1; Bonetti, 1963, 1968, 1972; Stipanicic & Bonetti, 1965		Johnstonia	stelzneriana		(Geinitz) Frenguelli, 1943	Corystospermaceae	Corystospermales	Pteridospermatophyta	Corystospermales	Argentina	San Juan Province	Barreal, Cuenca Cuyana	-31.6348	-69.4754	Locality	Barreal	East Chilenia	Southern Andes	240	-74.045	-41.399	South America	Barreal Formation	fine sandstone and limolites of light color		Anisian	Biozona de Dictyophyllum castellanosii, Johnstonia stelzneria, Saportaea dichotoma (CSD)	Anisian	30-40°N	25	0.472222	warm_temperate	warm_temperate	calculated	warm_temperate
1095	1192	427	266	Artabe et al.	2001		Johnstonia	stelzneriana				2	Zamunet et al., 1998	Paleocomunidad 2		Johnstonia	stelzneriana		(Geinitz) Frenguelli, 1943	Corystospermaceae	Corystospermales	Pteridospermatophyta	Corystospermales	Argentina	San Juan-la Rioja provinces	Cuenca de Ischigualasto-Villa Unión	-30.1635	-67.8423	Area	Ischigualasto	Famatina-Puna	Pampia	240	-72.019	-40.068	South America	Ischichuca Formation	III sequence	440 m from the base	Anisian	Biozona de Dictyophyllum castellanosii, Johnstonia stelzneria, Saportaea dichotoma (CSD)	Anisian	30-40°N	12	1	warm_temperate		calculated	warm_temperate
1098	992	367	259	Artabe et al.	2001		Kurtziana	cacheutensis				4		paleocomunidad 9: section inferior, NF2 sensu Ganuza et al., 1998		Kurtziana	cacheutensis		(Kurtz) Frenguelli, 1942	incertae sedis	Cycadales	Cycadophyta	Cycadales	Argentina		Agua de los Pajaritos	-31.4854	-69.4036	City	Hilario	Rio de la Plata	Pampia	240	-68.083	-48.583	South America	El Alcazar Formation			lower Ladinian	Biozona de Yabeiella mareyesiaca, Scytophyllum benettiae, Protocircoporoxylon (=Protophyllocladoxylon) cortaderitaensis (MBC)	Ladinian	30-40°N	21	1	warm_temperate	warm_temperate	calculated	warm_temperate
1110	992	367	259	Artabe et al.	2001		Linguifolium		sp.			1		paleocomunidad 9: section inferior, NF2 sensu Ganuza et al., 1998		Linguifolium		sp.		incertae sedis	incertae sedis	Pteridospermatophyta	Pteridospermatophyta incertae sedis	Argentina		Agua de los Pajaritos	-31.4854	-69.4036	City	Hilario	Rio de la Plata	Pampia	240	-68.083	-48.583	South America	El Alcazar Formation			lower Ladinian	Biozona de Yabeiella mareyesiaca, Scytophyllum benettiae, Protocircoporoxylon (=Protophyllocladoxylon) cortaderitaensis (MBC)	Ladinian	30-40°N	21	1	warm_temperate	warm_temperate	calculated	warm_temperate
1121	896	367	262	Artabe et al.	2001		Neocalamites	carrerei				4		paleocomunidad 6: section inferior, NF1 sensu Zamuner et al., 1999		Neocalamites	carrerei		(Zeiller) Halle, 1909	Equisetaceae	Equisetales	Sphenophyta	Equisetales	Argentina		Cortaderita, Mona Don Francisco	-31.6348	-69.4754	City	Barreal	Rio de la Plata	Pampia	240	-68.083	-48.583	South America	Cortaderita Formation			lower Ladinian	Biozona de Yabeiella mareyesiaca, Scytophyllum benettiae, Protocircoporoxylon (=Protophyllocladoxylon) cortaderitaensis (MBC)	Ladinian	30-40°N	21	1	warm_temperate	warm_temperate	calculated	warm_temperate
1122	992	367	259	Artabe et al.	2001		Neocalamites	carrerei				4		paleocomunidad 10: section inferior, NF3 sensu Ganuza et al., 1998		Neocalamites	carrerei		(Zeiller) Halle, 1909	Equisetaceae	Equisetales	Sphenophyta	Equisetales	Argentina		Agua de los Pajaritos	-31.4854	-69.4036	City	Hilario	Rio de la Plata	Pampia	240	-68.083	-48.583	South America	El Alcazar Formation			lower Ladinian	Biozona de Yabeiella mareyesiaca, Scytophyllum benettiae, Protocircoporoxylon (=Protophyllocladoxylon) cortaderitaensis (MBC)	Ladinian	30-40°N	21	1	warm_temperate	warm_temperate	calculated	warm_temperate
1125	562	394	251	Artabe et al.	2001		Neocalamites	carrerei				4		paleocomunidad 3: estrato fosilifero II de perfil A sensu Brea, 1995)		Neocalamites	carrerei		(Zeiller) Halle, 1909	Equisetaceae	Equisetales	Sphenophyta	Equisetales	Argentina	Mendoza Province	Agua de la Zorra, 24 km NO of Uspallata	-32.6257	-69.3284	City	Uspallata	Cuyana	Pampia	240	-74.012	-42.398	South America	Potrerillos Formation	lower section		lower Ladinian	Biozona de Yabeiella mareyesiaca, Scytophyllum benettiae, Protocircoporoxylon (=Protophyllocladoxylon) cortaderitaensis (MBC)	Ladinian	30-40°N	22	0.504762	warm_temperate	warm_temperate	calculated	warm_temperate
1126	713	278	255	Artabe et al.	2001		Neocalamites		sp.			1		Paleocomunidad 1: NF1/ punto 11 in Stipanicic & Menendez, 1949, pl. 10, fig. 1; Bonetti, 1963, 1968, 1972; Stipanicic & Bonetti, 1965		Neocalamites		sp.		Equisetaceae	Equisetales	Sphenophyta	Equisetales	Argentina	San Juan Province	Barreal, Cuenca Cuyana	-31.6348	-69.4754	Locality	Barreal	East Chilenia	Southern Andes	240	-74.045	-41.399	South America	Barreal Formation	fine sandstone and limolites of light color		Anisian	Biozona de Dictyophyllum castellanosii, Johnstonia stelzneria, Saportaea dichotoma (CSD)	Anisian	30-40°N	25	0.472222	warm_temperate	warm_temperate	calculated	warm_temperate
1127	562	394	251	Artabe et al.	2001		Neocalamostachys	arrondoi				4		paleocomunidad 3: estrato fosilifero II de perfil A sensu Brea, 1995)		Neocalamostachys	arrondoi		Brea et Artabe, 1999	Equisetaceae	Equisetales	Sphenophyta	Equisetales	Argentina	Mendoza Province	Agua de la Zorra, 24 km NO of Uspallata	-32.6257	-69.3284	City	Uspallata	Cuyana	Pampia	240	-74.012	-42.398	South America	Potrerillos Formation	lower section		lower Ladinian	Biozona de Yabeiella mareyesiaca, Scytophyllum benettiae, Protocircoporoxylon (=Protophyllocladoxylon) cortaderitaensis (MBC)	Ladinian	30-40°N	22	0.504762	warm_temperate	warm_temperate	calculated	warm_temperate
1131	562	394	251	Artabe et al.	2001		Nododendron	suberosum				1		paleocomunidad 3: estrato fosilifero II de perfil A sensu Brea, 1995)		Nododendron	suberosum		Artabe et Zamuner, 1991	incertae sedis	Equisetales	Sphenophyta	Equisetales	Argentina	Mendoza Province	Agua de la Zorra, 24 km NO of Uspallata	-32.6257	-69.3284	City	Uspallata	Cuyana	Pampia	240	-74.012	-42.398	South America	Potrerillos Formation	lower section		lower Ladinian	Biozona de Yabeiella mareyesiaca, Scytophyllum benettiae, Protocircoporoxylon (=Protophyllocladoxylon) cortaderitaensis (MBC)	Ladinian	30-40°N	22	0.504762	warm_temperate	warm_temperate	calculated	warm_temperate
1138	992	367	259	Artabe et al.	2001		Pachydermophyllum	praecordillerae				4		paleocomunidad 9: section inferior, NF2 sensu Ganuza et al., 1998		Pachydermophyllum	praecordillerae		(Frenguelli) Retallack, 1981	Peltaspermaceae	Peltaspermales	Pteridospermatophyta	Peltaspermales	Argentina		Agua de los Pajaritos	-31.4854	-69.4036	City	Hilario	Rio de la Plata	Pampia	240	-68.083	-48.583	South America	El Alcazar Formation			lower Ladinian	Biozona de Yabeiella mareyesiaca, Scytophyllum benettiae, Protocircoporoxylon (=Protophyllocladoxylon) cortaderitaensis (MBC)	Ladinian	30-40°N	21	1	warm_temperate	warm_temperate	calculated	warm_temperate
1144	713	278	255	Artabe et al.	2001		Pachydermophyllum	praecordillerae				1		Paleocomunidad 1: NF1/ punto 11 in Stipanicic & Menendez, 1949, pl. 10, fig. 1; Bonetti, 1963, 1968, 1972; Stipanicic & Bonetti, 1965		Pachydermophyllum	praecordillerae		(Frenguelli) Retallack, 1981	Peltaspermaceae	Peltaspermales	Pteridospermatophyta	Peltaspermales	Argentina	San Juan Province	Barreal, Cuenca Cuyana	-31.6348	-69.4754	Locality	Barreal	East Chilenia	Southern Andes	240	-74.045	-41.399	South America	Barreal Formation	fine sandstone and limolites of light color		Anisian	Biozona de Dictyophyllum castellanosii, Johnstonia stelzneria, Saportaea dichotoma (CSD)	Anisian	30-40°N	25	0.472222	warm_temperate	warm_temperate	calculated	warm_temperate
1145	896	367	262	Artabe et al.	2001		Peltaspermum		sp.			3		paleocomunidad 7: section inferior, NF2 and NF3 sensu Zamuner et al., 1999		Peltaspermum		sp.		Peltaspermaceae	Peltaspermales	Pteridospermatophyta	Peltaspermales	Argentina		Cortaderita, Mona Don Francisco	-31.6348	-69.4754	City	Barreal	Rio de la Plata	Pampia	240	-68.083	-48.583	South America	Cortaderita Formation			lower Ladinian	Biozona de Yabeiella mareyesiaca, Scytophyllum benettiae, Protocircoporoxylon (=Protophyllocladoxylon) cortaderitaensis (MBC)	Ladinian	30-40°N	21	1	warm_temperate	warm_temperate	calculated	warm_temperate
1150	713	278	255	Artabe et al.	2001		Pseudoctenis	barrealensis				1		Paleocomunidad 1: NF1/ punto 11 in Stipanicic & Menendez, 1949, pl. 10, fig. 1; Bonetti, 1963, 1968, 1972; Stipanicic & Bonetti, 1965		Pseudoctenis	barrealensis		(Frenguelli) Artabe	incertae sedis	Cycadales	Cycadophyta	Cycadales	Argentina	San Juan Province	Barreal, Cuenca Cuyana	-31.6348	-69.4754	Locality	Barreal	East Chilenia	Southern Andes	240	-74.045	-41.399	South America	Barreal Formation	fine sandstone and limolites of light color		Anisian	Biozona de Dictyophyllum castellanosii, Johnstonia stelzneria, Saportaea dichotoma (CSD)	Anisian	30-40°N	25	0.472222	warm_temperate	warm_temperate	calculated	warm_temperate
1158	713	278	255	Artabe et al.	2001		Pseudoctenis	fissa				1		Paleocomunidad 1: NF1/ punto 11 in Stipanicic & Menendez, 1949, pl. 10, fig. 1; Bonetti, 1963, 1968, 1972; Stipanicic & Bonetti, 1965		Pseudoctenis	fissa		du Toit	incertae sedis	Cycadales	Cycadophyta	Cycadales	Argentina	San Juan Province	Barreal, Cuenca Cuyana	-31.6348	-69.4754	Locality	Barreal	East Chilenia	Southern Andes	240	-74.045	-41.399	South America	Barreal Formation	fine sandstone and limolites of light color		Anisian	Biozona de Dictyophyllum castellanosii, Johnstonia stelzneria, Saportaea dichotoma (CSD)	Anisian	30-40°N	25	0.472222	warm_temperate	warm_temperate	calculated	warm_temperate
1160	713	278	255	Artabe et al.	2001		Pseudoctenis	groeberiana				1		Paleocomunidad 1: NF1/ punto 11 in Stipanicic & Menendez, 1949, pl. 10, fig. 1; Bonetti, 1963, 1968, 1972; Stipanicic & Bonetti, 1965		Pseudoctenis	groeberiana			incertae sedis	Cycadales	Cycadophyta	Cycadales	Argentina	San Juan Province	Barreal, Cuenca Cuyana	-31.6348	-69.4754	Locality	Barreal	East Chilenia	Southern Andes	240	-74.045	-41.399	South America	Barreal Formation	fine sandstone and limolites of light color		Anisian	Biozona de Dictyophyllum castellanosii, Johnstonia stelzneria, Saportaea dichotoma (CSD)	Anisian	30-40°N	25	0.472222	warm_temperate	warm_temperate	calculated	warm_temperate
1161	713	278	255	Artabe et al.	2001		Pseudoctenis	harringtoniana				1		Paleocomunidad 1: NF1/ punto 11 in Stipanicic & Menendez, 1949, pl. 10, fig. 1; Bonetti, 1963, 1968, 1972; Stipanicic & Bonetti, 1965		Pseudoctenis	harringtoniana		Bonetti	incertae sedis	Cycadales	Cycadophyta	Cycadales	Argentina	San Juan Province	Barreal, Cuenca Cuyana	-31.6348	-69.4754	Locality	Barreal	East Chilenia	Southern Andes	240	-74.045	-41.399	South America	Barreal Formation	fine sandstone and limolites of light color		Anisian	Biozona de Dictyophyllum castellanosii, Johnstonia stelzneria, Saportaea dichotoma (CSD)	Anisian	30-40°N	25	0.472222	warm_temperate	warm_temperate	calculated	warm_temperate
1162	713	278	255	Artabe et al.	2001		Pseudoctenis	propinquum				1		Paleocomunidad 1: NF1/ punto 11 in Stipanicic & Menendez, 1949, pl. 10, fig. 1; Bonetti, 1963, 1968, 1972; Stipanicic & Bonetti, 1965		Pseudoctenis	propinquum			incertae sedis	Cycadales	Cycadophyta	Cycadales	Argentina	San Juan Province	Barreal, Cuenca Cuyana	-31.6348	-69.4754	Locality	Barreal	East Chilenia	Southern Andes	240	-74.045	-41.399	South America	Barreal Formation	fine sandstone and limolites of light color		Anisian	Biozona de Dictyophyllum castellanosii, Johnstonia stelzneria, Saportaea dichotoma (CSD)	Anisian	30-40°N	25	0.472222	warm_temperate	warm_temperate	calculated	warm_temperate
1163	896	367	262	Artabe et al.	2001		Pseudoctenis		sp. A			4		paleocomunidad 7: section inferior, NF2 and NF3 sensu Zamuner et al., 1999		Pseudoctenis		sp. A		incertae sedis	Cycadales	Cycadophyta	Cycadales	Argentina		Cortaderita, Mona Don Francisco	-31.6348	-69.4754	City	Barreal	Rio de la Plata	Pampia	240	-68.083	-48.583	South America	Cortaderita Formation			lower Ladinian	Biozona de Yabeiella mareyesiaca, Scytophyllum benettiae, Protocircoporoxylon (=Protophyllocladoxylon) cortaderitaensis (MBC)	Ladinian	30-40°N	21	1	warm_temperate	warm_temperate	calculated	warm_temperate
1166	713	278	255	Artabe et al.	2001		Pterophyllum	angustum	cf.			1		Paleocomunidad 1: NF1/ punto 11 in Stipanicic & Menendez, 1949, pl. 10, fig. 1; Bonetti, 1963, 1968, 1972; Stipanicic & Bonetti, 1965		Pterophyllum	angustum	cf.	(Braun) Gothan	incertae sedis	Bennettitales?	Cycadophyta	Bennettitales	Argentina	San Juan Province	Barreal, Cuenca Cuyana	-31.6348	-69.4754	Locality	Barreal	East Chilenia	Southern Andes	240	-74.045	-41.399	South America	Barreal Formation	fine sandstone and limolites of light color		Anisian	Biozona de Dictyophyllum castellanosii, Johnstonia stelzneria, Saportaea dichotoma (CSD)	Anisian	30-40°N	25	0.472222	warm_temperate	warm_temperate	calculated	warm_temperate
1171	896	367	262	Artabe et al.	2001		Protocircoporoxylon	cortaderitaense				4		paleocomunidad 5: section inferior of Zamuner et al., 1999		Rhexoxylon	cortaderitaense		(Menéndez) Bodnar	Corystospermaceae	Corystospermales	Pteridospermatophyta	Corystospermales	Argentina		Cortaderita, Mona Don Francisco	-31.6348	-69.4754	City	Barreal	Rio de la Plata	Pampia	240	-68.083	-48.583	South America	Cortaderita Formation			lower Ladinian	Biozona de Yabeiella mareyesiaca, Scytophyllum benettiae, Protocircoporoxylon (=Protophyllocladoxylon) cortaderitaensis (MBC)	Ladinian	30-40°N	21	1	warm_temperate	warm_temperate	calculated	warm_temperate
1173	896	367	262	Artabe et al.	2001		Rhexoxylon		sp. A			4		paleocomunidad 5: section inferior of Zamuner et al., 1999		Rhexoxylon		sp. A		Corystospermaceae	Corystospermales	Pteridospermatophyta	Corystospermales	Argentina		Cortaderita, Mona Don Francisco	-31.6348	-69.4754	City	Barreal	Rio de la Plata	Pampia	240	-68.083	-48.583	South America	Cortaderita Formation			lower Ladinian	Biozona de Yabeiella mareyesiaca, Scytophyllum benettiae, Protocircoporoxylon (=Protophyllocladoxylon) cortaderitaensis (MBC)	Ladinian	30-40°N	21	1	warm_temperate	warm_temperate	calculated	warm_temperate
1177	713	278	255	Artabe et al.	2001		Saportaea	dichotoma				3		Paleocomunidad 1: NF1/ punto 11 in Stipanicic & Menendez, 1949, pl. 10, fig. 1; Bonetti, 1963, 1968, 1972; Stipanicic & Bonetti, 1965		Saportaea	dichotoma		(Frenguelli) Stipanicic et Bonetti	incertae sedis	Ginkgoales	Ginkgophyta	Ginkgoales	Argentina	San Juan Province	Barreal, Cuenca Cuyana	-31.6348	-69.4754	Locality	Barreal	East Chilenia	Southern Andes	240	-74.045	-41.399	South America	Barreal Formation	fine sandstone and limolites of light color		Anisian	Biozona de Dictyophyllum castellanosii, Johnstonia stelzneria, Saportaea dichotoma (CSD)	Anisian	30-40°N	25	0.472222	warm_temperate	warm_temperate	calculated	warm_temperate
1178	713	278	255	Artabe et al.	2001		Saportaea	flabellata				2		Paleocomunidad 1: NF1/ punto 11 in Stipanicic & Menendez, 1949, pl. 10, fig. 1; Bonetti, 1963, 1968, 1972; Stipanicic & Bonetti, 1965		Saportaea	flabellata		(Frenguelli) Stipanicic et Bonetti	incertae sedis	Ginkgoales	Ginkgophyta	Ginkgoales	Argentina	San Juan Province	Barreal, Cuenca Cuyana	-31.6348	-69.4754	Locality	Barreal	East Chilenia	Southern Andes	240	-74.045	-41.399	South America	Barreal Formation	fine sandstone and limolites of light color		Anisian	Biozona de Dictyophyllum castellanosii, Johnstonia stelzneria, Saportaea dichotoma (CSD)	Anisian	30-40°N	25	0.472222	warm_temperate	warm_temperate	calculated	warm_temperate
1179	713	278	255	Artabe et al.	2001		Saportaea	intermedia				3		Paleocomunidad 1: NF1/ punto 11 in Stipanicic & Menendez, 1949, pl. 10, fig. 1; Bonetti, 1963, 1968, 1972; Stipanicic & Bonetti, 1965		Saportaea	intermedia		Stipanicic et Menéndez	incertae sedis	Ginkgoales	Ginkgophyta	Ginkgoales	Argentina	San Juan Province	Barreal, Cuenca Cuyana	-31.6348	-69.4754	Locality	Barreal	East Chilenia	Southern Andes	240	-74.045	-41.399	South America	Barreal Formation	fine sandstone and limolites of light color		Anisian	Biozona de Dictyophyllum castellanosii, Johnstonia stelzneria, Saportaea dichotoma (CSD)	Anisian	30-40°N	25	0.472222	warm_temperate	warm_temperate	calculated	warm_temperate
1180	896	367	262	Artabe et al.	2001		Scyophyllum	bonettiae				4		paleocomunidad 7: section inferior, NF2 and NF3 sensu Zamuner et al., 1999		Scytophyllum	bonettiae		Zamuner et al., 1990	Peltaspermaceae	Peltaspermales	Pteridospermatophyta	Peltaspermales	Argentina		Cortaderita, Mona Don Francisco	-31.6348	-69.4754	City	Barreal	Rio de la Plata	Pampia	240	-68.083	-48.583	South America	Cortaderita Formation			lower Ladinian	Biozona de Yabeiella mareyesiaca, Scytophyllum benettiae, Protocircoporoxylon (=Protophyllocladoxylon) cortaderitaensis (MBC)	Ladinian	30-40°N	21	1	warm_temperate	warm_temperate	calculated	warm_temperate
1187	992	367	259	Artabe et al.	2001		Sphenobaiera	robusta				1		paleocomunidad 9: section inferior, NF2 sensu Ganuza et al., 1998		Sphenobaiera	coronata		Anderson et Anderson	incertae sedis	Ginkgoales	Ginkgophyta	Ginkgoales	Argentina		Agua de los Pajaritos	-31.4854	-69.4036	City	Hilario	Rio de la Plata	Pampia	240	-68.083	-48.583	South America	El Alcazar Formation			lower Ladinian	Biozona de Yabeiella mareyesiaca, Scytophyllum benettiae, Protocircoporoxylon (=Protophyllocladoxylon) cortaderitaensis (MBC)	Ladinian	30-40°N	21	1	warm_temperate	warm_temperate	calculated	warm_temperate
1201	1192	427	265	Artabe et al.	2001		Telemachus	elongatus				2	Zamunet et al., 1998	Paleocomunidad 2		Telemachus	elongatus		Anderson	incertae sedis	Voltziales	Coniferophyta	Voltziales	Argentina	San Juan-la Rioja provinces	Cuenca de Ischigualasto-Villa Unión	-30.1635	-67.8423	Area	Ischigualasto	Famatina-Puna	Pampia	240	-72.019	-40.068	South America	Ischichuca Formation	II sequence	300 m from the base	Anisian	Biozona de Dictyophyllum castellanosii, Johnstonia stelzneria, Saportaea dichotoma (CSD)	Anisian	30-40°N	12	1	warm_temperate		calculated	warm_temperate
1203	896	367	262	Artabe et al.	2001		Tranquiloxylon		sp.			4		paleocomunidad 5: section inferior of Zamuner et al., 1999		Tranquiloxylon		sp.		Corystospermaceae	Corystospermales	Pteridospermatophyta	Corystospermales	Argentina		Cortaderita, Mona Don Francisco	-31.6348	-69.4754	City	Barreal	Rio de la Plata	Pampia	240	-68.083	-48.583	South America	Cortaderita Formation			lower Ladinian	Biozona de Yabeiella mareyesiaca, Scytophyllum benettiae, Protocircoporoxylon (=Protophyllocladoxylon) cortaderitaensis (MBC)	Ladinian	30-40°N	21	1	warm_temperate	warm_temperate	calculated	warm_temperate
1204	992	367	259	Artabe et al.	2001		Tranquiloxylon		sp.			4		paleocomunidad 8: section inferior, NF1 sensu Ganuza et al., 1998		Tranquiloxylon		sp.		Corystospermaceae	Corystospermales	Pteridospermatophyta	Corystospermales	Argentina		Agua de los Pajaritos	-31.4854	-69.4036	City	Hilario	Rio de la Plata	Pampia	240	-68.083	-48.583	South America	El Alcazar Formation			lower Ladinian	Biozona de Yabeiella mareyesiaca, Scytophyllum benettiae, Protocircoporoxylon (=Protophyllocladoxylon) cortaderitaensis (MBC)	Ladinian	30-40°N	21	1	warm_temperate	warm_temperate	calculated	warm_temperate
1219	992	367	259	Artabe et al.	2001		Yabeiella	mareyesiaca				4		paleocomunidad 9: section inferior, NF2 sensu Ganuza et al., 1998		Yabeiella	mareyesiaca		(Geinitz) Oishi, 1931	incertae sedis	incertae sedis	incertae sedis	Gnetales	Argentina		Agua de los Pajaritos	-31.4854	-69.4036	City	Hilario	Rio de la Plata	Pampia	240	-68.083	-48.583	South America	El Alcazar Formation			lower Ladinian	Biozona de Yabeiella mareyesiaca, Scytophyllum benettiae, Protocircoporoxylon (=Protophyllocladoxylon) cortaderitaensis (MBC)	Ladinian	30-40°N	21	1	warm_temperate	warm_temperate	calculated	warm_temperate
1227	713	278	255	Artabe et al.	2001		Zuberia	feistmanteli				2		Paleocomunidad 1: NF1/ punto 11 in Stipanicic & Menendez, 1949, pl. 10, fig. 1; Bonetti, 1963, 1968, 1972; Stipanicic & Bonetti, 1965		Zuberia	feistmantelii		(Johnston) Frenguelli, 1943	Corystospermaceae	Corystospermales	Pteridospermatophyta	Corystospermales	Argentina	San Juan Province	Barreal, Cuenca Cuyana	-31.6348	-69.4754	Locality	Barreal	East Chilenia	Southern Andes	240	-74.045	-41.399	South America	Barreal Formation	fine sandstone and limolites of light color		Anisian	Biozona de Dictyophyllum castellanosii, Johnstonia stelzneria, Saportaea dichotoma (CSD)	Anisian	30-40°N	25	0.472222	warm_temperate	warm_temperate	calculated	warm_temperate
1228	896	367	262	Artabe et al.	2001		Zuberia	papillata				4		paleocomunidad 7: section inferior, NF2 and NF3 sensu Zamuner et al., 1999		Zuberia	papillata		(Townrow) Artabe, 1990	Corystospermaceae	Corystospermales	Pteridospermatophyta	Corystospermales	Argentina		Cortaderita, Mona Don Francisco	-31.6348	-69.4754	City	Barreal	Rio de la Plata	Pampia	240	-68.083	-48.583	South America	Cortaderita Formation			lower Ladinian	Biozona de Yabeiella mareyesiaca, Scytophyllum benettiae, Protocircoporoxylon (=Protophyllocladoxylon) cortaderitaensis (MBC)	Ladinian	30-40°N	21	1	warm_temperate	warm_temperate	calculated	warm_temperate
1233	896	367	262	Artabe et al.	2001		Zuberia		sp.			4		paleocomunidad 7: section inferior, NF2 and NF3 sensu Zamuner et al., 1999		Zuberia		sp.		Corystospermaceae	Corystospermales	Pteridospermatophyta	Corystospermales	Argentina		Cortaderita, Mona Don Francisco	-31.6348	-69.4754	City	Barreal	Rio de la Plata	Pampia	240	-68.083	-48.583	South America	Cortaderita Formation			lower Ladinian	Biozona de Yabeiella mareyesiaca, Scytophyllum benettiae, Protocircoporoxylon (=Protophyllocladoxylon) cortaderitaensis (MBC)	Ladinian	30-40°N	21	1	warm_temperate	warm_temperate	calculated	warm_temperate
1234	1192	427	266	Artabe et al.	2001		Zuberia		sp.			2	Zamunet et al., 1998	Paleocomunidad 2		Zuberia		sp.		Corystospermaceae	Corystospermales	Pteridospermatophyta	Corystospermales	Argentina	San Juan-la Rioja provinces	Cuenca de Ischigualasto-Villa Unión	-30.1635	-67.8423	Area	Ischigualasto	Famatina-Puna	Pampia	240	-72.019	-40.068	South America	Ischichuca Formation	III sequence	440 m from the base	Anisian	Biozona de Dictyophyllum castellanosii, Johnstonia stelzneria, Saportaea dichotoma (CSD)	Anisian	30-40°N	12	1	warm_temperate		calculated	warm_temperate
1235	896	367	262	Artabe et al.	2001		Zuberia	zuberi				2		paleocomunidad 7: section inferior, NF2 and NF3 sensu Zamuner et al., 1999		Zuberia	zuberi		(Szajnocha) Frenguelli, 1943	Corystospermaceae	Corystospermales	Pteridospermatophyta	Corystospermales	Argentina		Cortaderita, Mona Don Francisco	-31.6348	-69.4754	City	Barreal	Rio de la Plata	Pampia	240	-68.083	-48.583	South America	Cortaderita Formation			lower Ladinian	Biozona de Yabeiella mareyesiaca, Scytophyllum benettiae, Protocircoporoxylon (=Protophyllocladoxylon) cortaderitaensis (MBC)	Ladinian	30-40°N	21	1	warm_temperate	warm_temperate	calculated	warm_temperate
1239	713	278	255	Artabe et al.	2001		Zuberia	zuberi				1		Paleocomunidad 1: NF1/ punto 11 in Stipanicic & Menendez, 1949, pl. 10, fig. 1; Bonetti, 1963, 1968, 1972; Stipanicic & Bonetti, 1965		Zuberia	zuberi		(Szajnocha) Frenguelli, 1943	Corystospermaceae	Corystospermales	Pteridospermatophyta	Corystospermales	Argentina	San Juan Province	Barreal, Cuenca Cuyana	-31.6348	-69.4754	Locality	Barreal	East Chilenia	Southern Andes	240	-74.045	-41.399	South America	Barreal Formation	fine sandstone and limolites of light color		Anisian	Biozona de Dictyophyllum castellanosii, Johnstonia stelzneria, Saportaea dichotoma (CSD)	Anisian	30-40°N	25	0.472222	warm_temperate	warm_temperate	calculated	warm_temperate
1240	1192	427	265	Artabe et al.	2001		Zuberia	zuberi				2	Zamunet et al., 1998	Paleocomunidad 2		Zuberia	zuberi		(Szajnocha) Frenguelli, 1943	Corystospermaceae	Corystospermales	Pteridospermatophyta	Corystospermales	Argentina	San Juan-la Rioja provinces	Cuenca de Ischigualasto-Villa Unión	-30.1635	-67.8423	Area	Ischigualasto	Famatina-Puna	Pampia	240	-72.019	-40.068	South America	Ischichuca Formation	II sequence	300 m from the base	Anisian	Biozona de Dictyophyllum castellanosii, Johnstonia stelzneria, Saportaea dichotoma (CSD)	Anisian	30-40°N	12	1	warm_temperate		calculated	warm_temperate
1946	90	223	314	Axsmith & Taylor	1997		Sphenozamites	tener		Linnell, 1932						Apoldia	tenera		(Compter 1883) Zijlstra et al. 2009	incertae sedis	Cycadales	Cycadophyta	Cycadales	Germany		Thale	51.7474	11.0414	Locality	Thale am Harz	Harz-Giessen	Anglo-Saxonia	240	-4.931	23.643	Europe	Erfurt Formation			Ladinian		Ladinian	30-40°N	828	1	tropical_summerwet		calculated	tropical_summerwet
1947	90	223	314	Axsmith & Taylor	1997		Cladophlebis	remota								Cladophlebis	remota		(Presl in Sternberg, 1838) Van Konijnenburg-van Cittert et al. 2006	Osmundaceae	Osmundales	Pteridophyta	Osmundales	Germany		Thale	51.7474	11.0414	Locality	Thale am Harz	Harz-Giessen	Anglo-Saxonia	240	-4.931	23.643	Europe	Erfurt Formation			Ladinian		Ladinian	30-40°N	828	1	tropical_summerwet		calculated	tropical_summerwet
1948	90	223	314	Axsmith & Taylor	1997		Pseudodanaeopsis	marantacea								Danaeopsis	marantaceae		(Presl in Sternberg, 1838) Schimper, 1869	Marattiaceae	Marattiales	Pteridophyta	Marattiales	Germany		Thale	51.7474	11.0414	Locality	Thale am Harz	Harz-Giessen	Anglo-Saxonia	240	-4.931	23.643	Europe	Erfurt Formation			Ladinian		Ladinian	30-40°N	828	1	tropical_summerwet		calculated	tropical_summerwet
1949	90	223	314	Axsmith & Taylor	1997		Dioonitocarpidium	pennaeforme								Dioonitocarpidium	pennaeformis		(Schenk) Rühle von Lilienstern, 1928	incertae sedis	Cycadales	Cycadophyta	Cycadales	Germany		Thale	51.7474	11.0414	Locality	Thale am Harz	Harz-Giessen	Anglo-Saxonia	240	-4.931	23.643	Europe	Erfurt Formation			Ladinian		Ladinian	30-40°N	828	1	tropical_summerwet		calculated	tropical_summerwet
1950	90	223	314	Axsmith & Taylor	1997		Equisetites	arenaceus								Equisetites	arenaceus		(Jaeger, 1827) Schenk, 1864	Equisetaceae	Equisetales	Sphenophyta	Equisetales	Germany		Thale	51.7474	11.0414	Locality	Thale am Harz	Harz-Giessen	Anglo-Saxonia	240	-4.931	23.643	Europe	Erfurt Formation			Ladinian		Ladinian	30-40°N	828	1	tropical_summerwet		calculated	tropical_summerwet
1951	90	223	314	Axsmith & Taylor	1997		Glyptolepis	richteri		Axsmith et Taylor, 1997						Glyptolepis	richteri		Axsmith et Taylor, 1997	Voltziaceae	Voltziales	Coniferophyta	Voltziales	Germany		Thale	51.7474	11.0414	Locality	Thale am Harz	Harz-Giessen	Anglo-Saxonia	240	-4.931	23.643	Europe	Erfurt Formation			Ladinian		Ladinian	30-40°N	828	1	tropical_summerwet		calculated	tropical_summerwet
1952	90	223	314	Axsmith & Taylor	1997		Glyptolepis	richteri		Axsmith et Taylor, 1997	pl. 1, fig. 1-5					Glyptolepis	richteri		Axsmith et Taylor, 1997	Voltziaceae	Voltziales	Coniferophyta	Voltziales	Germany		Thale	51.7474	11.0414	Locality	Thale am Harz	Harz-Giessen	Anglo-Saxonia	240	-4.931	23.643	Europe	Erfurt Formation		S50052	Ladinian		Ladinian	30-40°N	828	1	tropical_summerwet		calculated	tropical_summerwet
1953	90	223	314	Axsmith & Taylor	1997		Macrotaeniopteris		sp.							Macrotaeniopteris		sp.		incertae sedis	Cycadales	Cycadophyta	Cycadales	Germany		Thale	51.7474	11.0414	Locality	Thale am Harz	Harz-Giessen	Anglo-Saxonia	240	-4.931	23.643	Europe	Erfurt Formation			Ladinian		Ladinian	30-40°N	828	1	tropical_summerwet		calculated	tropical_summerwet
1954	90	223	314	Axsmith & Taylor	1997		Equisetites	asperrimus								Neocalamites	asperissimus		(Franke 1936) Shen 1990	Equisetaceae	Equisetales	Sphenophyta	Equisetales	Germany		Thale	51.7474	11.0414	Locality	Thale am Harz	Harz-Giessen	Anglo-Saxonia	240	-4.931	23.643	Europe	Erfurt Formation			Ladinian		Ladinian	30-40°N	828	1	tropical_summerwet		calculated	tropical_summerwet
1955	90	223	314	Axsmith & Taylor	1997		Neuropteridium		sp.							Neuropteridium		sp.		Osmundaceae	Osmundales	Pteridophyta	Osmundales	Germany		Thale	51.7474	11.0414	Locality	Thale am Harz	Harz-Giessen	Anglo-Saxonia	240	-4.931	23.643	Europe	Erfurt Formation			Ladinian		Ladinian	30-40°N	828	1	tropical_summerwet		calculated	tropical_summerwet
1956	90	223	314	Axsmith & Taylor	1997		Pachylepis	quinquies								Pachylepis	quinquies			incertae sedis	incertae sedis	incertae sedis	incertae sedis incertae sedis	Germany		Thale	51.7474	11.0414	Locality	Thale am Harz	Harz-Giessen	Anglo-Saxonia	240	-4.931	23.643	Europe	Erfurt Formation			Ladinian		Ladinian	30-40°N	828	1	tropical_summerwet		calculated	tropical_summerwet
1957	90	223	314	Axsmith & Taylor	1997		Pecopteris	latepinnata								Pecopteris	latepinnata		Leuthard	Osmundaceae	Osmundales	Pteridophyta	Osmundales	Germany		Thale	51.7474	11.0414	Locality	Thale am Harz	Harz-Giessen	Anglo-Saxonia	240	-4.931	23.643	Europe	Erfurt Formation			Ladinian		Ladinian	30-40°N	828	1	tropical_summerwet		calculated	tropical_summerwet
1958	90	223	314	Axsmith & Taylor	1997		Scytophyllum	bornemann		Linnell, 1933						Peltaspermum	bornemannii		Kustatscher et al., 2007	Peltaspermaceae	Peltaspermales	Pteridospermatophyta	Peltaspermales	Germany		Thale	51.7474	11.0414	Locality	Thale am Harz	Harz-Giessen	Anglo-Saxonia	240	-4.931	23.643	Europe	Erfurt Formation			Ladinian		Ladinian	30-40°N	828	1	tropical_summerwet		calculated	tropical_summerwet
1959	90	223	314	Axsmith & Taylor	1997		Pterophyllum	jaegeri								Pterophyllum	filicoides		(Schlotheim, 1822) Zeiller, 1906	incertae sedis	Bennettitales?	Cycadophyta	Bennettitales	Germany		Thale	51.7474	11.0414	Locality	Thale am Harz	Harz-Giessen	Anglo-Saxonia	240	-4.931	23.643	Europe	Erfurt Formation			Ladinian		Ladinian	30-40°N	828	1	tropical_summerwet		calculated	tropical_summerwet
1960	90	223	314	Axsmith & Taylor	1997		Pecopteris	schoenleiniana								Sphenopteris	schoenleiniana		(Brongniart, 1836) Presl, 1838	Sphenopteridaceae	incertae sedis	Pteridophylla	Pteridophylla incertae sedis	Germany		Thale	51.7474	11.0414	Locality	Thale am Harz	Harz-Giessen	Anglo-Saxonia	240	-4.931	23.643	Europe	Erfurt Formation			Ladinian		Ladinian	30-40°N	828	1	tropical_summerwet		calculated	tropical_summerwet
1961	90	223	314	Axsmith & Taylor	1997		Bernoullia	helvetica								Symopteris	rumpfii		(Schenk, 1864) Kustatscher et al., 2011	Marattiaceae	Marattiales	Pteridophyta	Marattiales	Germany		Thale	51.7474	11.0414	Locality	Thale am Harz	Harz-Giessen	Anglo-Saxonia	240	-4.931	23.643	Europe	Erfurt Formation			Ladinian		Ladinian	30-40°N	828	1	tropical_summerwet		calculated	tropical_summerwet
1962	90	223	315	Axsmith & Taylor	1997		Glyptolepis		sp.		pl. 1, fig. 1			Richter, P.B.		Glyptolepis		sp.		Voltziaceae	Voltziales	Coniferophyta	Voltziales	Germany		Thale	51.7474	11.0414	Locality	Thale am Harz	Harz-Giessen	Anglo-Saxonia	240	-4.931	23.643	Europe	Lettenkohle		S050051	Upper Ladinian		Ladinian	30-40°N	828	1	tropical_summerwet		calculated	tropical_summerwet
1966	1840	748	319	Axsmith et al.	1998		Notophytum	krauselii		Meyer-Berthaud et Taylor, 1991						Notophytum	kraeuselii		Meyer-Bertraud et Taylor, 1991	Podocarpaceae	Coniferales	Coniferophyta	Coniferales	Antarctica	Queen Alexandria Range	Fremouw Peak	-84.2833	164.333	Locality	Fremouw Peak	Mawson	East Antarctica	240	36.165	-76.301	Antarctica	Fremouw Formation		11233	Anisian		Anisian	60-70°S	36	1	cold_temperate		calculated	cold_temperate
2099	757	250	357	Bauer et al.	2013		Baiera	mansfeldensis		Bauer et al., 2013						Baiera	mansfeldensis		Bauer et al., 2013	incertae sedis	Ginkgoales	Ginkgophyta	Ginkgoales	Germany	Saxony-Anhalt	Wolfschacht, Manfeld	51.5981	11.4588	City	Mansfeld	South-West Avalonia	Anglo-Saxonia	250	-0.48	22.569	Europe	Kupferschiefer			Wuchiapingian		Wuchiapingian	30-40°N	27	0.442308	subtropical_desert		calculated	subtropical_desert
2102	194	359	360	Bauer et al.	2014		Baiera	digitata		(Brogniart) Heer, 1876						Baiera	digitata		(Brongniart) Heer, 1876	incertae sedis	Ginkgoales	Ginkgophyta	Ginkgoales	Italy	South Tyrol	Bletterbach	46.3612	11.4169	Locality	Bletterbach	Carnic Alps - South Karawanken	Western Europe - Alps	250	-1.32	12.144	Europe	Gröden/Val Gardena Sandstone			middle Wuchiapingian		Wuchiapingian	20-30°N	94	1	subtropical_desert		calculated	subtropical_desert
2103	194	359	360	Bauer et al.	2014	?	Dicranophyllum		sp.						?	Brinkia	kerpiana			incertae sedis	Czekanowskiales	Gymnospermae	Ginkgophyta incertae sedis	Italy	South Tyrol	Bletterbach	46.3612	11.4169	Locality	Bletterbach	Carnic Alps - South Karawanken	Western Europe - Alps	250	-1.32	12.144	Europe	Gröden/Val Gardena Sandstone			middle Wuchiapingian		Wuchiapingian	20-30°N	94	1	subtropical_desert		calculated	subtropical_desert
2104	194	359	360	Bauer et al.	2014	?	Psygmophyllum		sp.						?	Brinkia	kerpiana			incertae sedis	Czekanowskiales	Gymnospermae	Palaeophyllales	Italy	South Tyrol	Bletterbach	46.3612	11.4169	Locality	Bletterbach	Carnic Alps - South Karawanken	Western Europe - Alps	250	-1.32	12.144	Europe	Gröden/Val Gardena Sandstone			middle Wuchiapingian		Wuchiapingian	20-30°N	94	1	subtropical_desert		calculated	subtropical_desert
2105	194	359	360	Bauer et al.	2014		Sphenobaiera		sp. A							Sphenobaiera		sp. A		incertae sedis	Ginkgoales	Ginkgophyta	Ginkgoales	Italy	South Tyrol	Bletterbach	46.3612	11.4169	Locality	Bletterbach	Carnic Alps - South Karawanken	Western Europe - Alps	250	-1.32	12.144	Europe	Gröden/Val Gardena Sandstone			middle Wuchiapingian		Wuchiapingian	20-30°N	94	1	subtropical_desert		calculated	subtropical_desert
2107	466	186	361	Bayerische Staatssammlung für Paläontologie und Geologie, Munich			Anomopteris	mougeotii								Anomopteris	mougeotii		Brongniart, 1828	Osmundaceae	Osmundales	Pteridophyta	Osmundales	Germany		Beckingen, Saar	49.3926	6.70224	Locality	Beckingen	Northern Phyllite Zone	Anglo-Saxonia	250	-2.854	19.551	Europe	Buntsandstein			Olenekian		Olenekian	20-30°N	23	0.376812		tropical_summerwet	manual	tropical_summerwet
2108	472	189	362	Bayerische Staatssammlung für Paläontologie und Geologie, Munich			Anomopteris	mougeotii								Anomopteris	mougeotii		Brongniart, 1828	Osmundaceae	Osmundales	Pteridophyta	Osmundales	Germany		Flosdorf bei Zülpich	50.6938	6.65499	City	Zülpich	South-West Avalonia	Anglo-Saxonia	250	-3.274	20.791	Europe	Buntsandstein			Olenekian		Olenekian	30-40°N	5	0.433333		tropical_summerwet	manual	tropical_summerwet
2109	300	83	363	Bayerische Staatssammlung für Paläontologie und Geologie, Munich			Neuropteridium	elegans								Neuropteridium	elegans		(Brongniart, 1828) Schimper in Schimper et Schenk, 1879	Osmundaceae	Osmundales	Pteridophyta	Osmundales	France	Alsace	Soultz-les-Bains	48.5682	7.47788	Locality		Saxo-Thuringian	Anglo-Saxonia	240	-5.793	19.813	Europe	Voltziensandstein			Anisian		Anisian	20-30°N	432	1	tropical_summerwet		calculated	tropical_summerwet
2110	300	83	363	Bayerische Staatssammlung für Paläontologie und Geologie, Munich			Neuropteridium	voltzii								Neuropteridium	voltzii		(Brongniart, 1828) Schimper, 1879	Osmundaceae	Osmundales	Pteridophyta	Osmundales	France	Alsace	Soultz-les-Bains	48.5682	7.47788	Locality		Saxo-Thuringian	Anglo-Saxonia	240	-5.793	19.813	Europe	Voltziensandstein			Anisian		Anisian	20-30°N	432	1	tropical_summerwet		calculated	tropical_summerwet
2111	300	83	364	Bayerische Staatssammlung für Paläontologie und Geologie, Munich			Pelourdea	vogesiaca								Pelourdea	vogesiaca		(Schimper et Mougeot) Seward 1917	incertae sedis	incertae sedis	Coniferophyta	Coniferophyta incertae sedis	France	Alsace	Soultz-les-Bains	48.5682	7.47788	Locality		Saxo-Thuringian	Anglo-Saxonia	240	-5.793	19.813	Europe	Oberer Buntsandstein			Anisian		Anisian	20-30°N	432	1	tropical_summerwet		calculated	tropical_summerwet
2112	1948	578	365	Bayerische Staatssammlung für Paläontologie und Geologie, Munich			Pleuromeia	sternbergii								Pleuromeia	sternbergii		(Münster, 1839) Corda ex Giebel, 1853	Pleuromeiaceae	Pleuromeiales	Lycophyta	Pleuromeiales	Germany		Singen / Thüringen	50.7255	11.0582	Locality		Saxo-Thuringian	Anglo-Saxonia	250	-0.432	21.662	Europe	Mittlerer Buntsandstein			Olenekian		Olenekian	30-40°N	11	0.318182		tropical_summerwet	manual	tropical_summerwet
2113	1948	578	366	Bayerische Staatssammlung für Paläontologie und Geologie, Munich			Schizoneura	paradoxa								Schizoneura	paradoxa		(Schimper et Mougeot) Grauvogel-Stamm, 1978	Equisetaceae	Equisetales	Sphenophyta	Equisetales	Germany		Singen / Thüringen	50.7255	11.0582	Locality		Saxo-Thuringian	Anglo-Saxonia	250	-0.432	21.662	Europe	Mittlerer Buntsandstein, Türingischer Chiotheriensandstein			Olenekian		Olenekian	30-40°N	11	0.318182		tropical_summerwet	manual	tropical_summerwet
2114	2144	101	367	Bayerische Staatssammlung für Paläontologie und Geologie, Munich			Schizoneura	paradoxa								Schizoneura	paradoxa		(Schimper et Mougeot) Grauvogel-Stamm, 1978	Equisetaceae	Equisetales	Sphenophyta	Equisetales	Germany		Vilsberg (Moselle) / Frankreich	48.7857	7.25491	Locality	Vilsberg	Saxo-Thuringian	Anglo-Saxonia	240	-6.026	19.957	Europe	O. Buntsandstein, Voltziensandstein - Werksandstein			Anisian		Anisian	20-30°N	432	1	tropical_summerwet		calculated	tropical_summerwet
2115	472	189	362	Bayerische Staatssammlung für Paläontologie und Geologie, Munich			Crematopteris	typica								Scolopendrites	scolopendrioides		(Brongniart, 1828) van Konjinenburg-van Cittert et al., 2006	Osmundaceae	Osmundales	Pteridophyta	Osmundales	Germany		Flosdorf bei Zülpich	50.6938	6.65499	City	Zülpich	South-West Avalonia	Anglo-Saxonia	250	-3.274	20.791	Europe	Buntsandstein			Olenekian		Olenekian	30-40°N	5	0.433333		tropical_summerwet	manual	tropical_summerwet
2116	2332	726	368	Bayerische Staatssammlung für Paläontologie und Geologie, Munich			Voltzia	heterophylla								Voltzia	heterophylla		Brongniart, 1828	Voltziaceae	Voltziales	Coniferophyta	Voltziales	France		Hangritter (Elsaß)	48.3299	7.47061	Region	Elsass	Moldanubian	Anglo-Saxonia	240	-5.7	19.591	Europe	Oberer Buntsandstein			Anisian		Anisian	20-30°N	344	1	tropical_summerwet		calculated	tropical_summerwet
2117	300	83	364	Bayerische Staatssammlung für Paläontologie und Geologie, Munich			Voltzia	heterophylla								Voltzia	heterophylla		Brongniart, 1828	Voltziaceae	Voltziales	Coniferophyta	Voltziales	France	Alsace	Soultz-les-Bains	48.5682	7.47788	Locality		Saxo-Thuringian	Anglo-Saxonia	240	-5.793	19.813	Europe	Oberer Buntsandstein			Anisian		Anisian	20-30°N	432	1	tropical_summerwet		calculated	tropical_summerwet
2126	1544	519	373	Bayerische Staatssammlung für Paläontologie und Geologie, Munich			Equisetites	mougeotii								Equisetites	mougeotii		(Brongniart, 1828) Wills, 1910	Equisetaceae	Equisetales	Sphenophyta	Equisetales	Germany		Gössenheim b. Wernfeld/ Unterfranken	50.0202	9.78162	Locality		Saxo-Thuringian	Anglo-Saxonia	240	-4.934	21.742	Europe	Oberer Buntsandstein			Anisian		Anisian	30-40°N	13	0.326923		tropical_summerwet	manual	tropical_summerwet
2127	2336	730	374	Bayerische Staatssammlung für Paläontologie und Geologie, Munich			Voltzia	heterophylla								Voltzia	heterophylla		Brongniart, 1828	Voltziaceae	Voltziales	Coniferophyta	Voltziales	Germany		?Gambach b. Karlstadt/ Unterfranken	50.002	9.75131	Locality	Gambach b. Karlstadt	Saxo-Thuringian	Anglo-Saxonia	240	-4.946	21.717	Europe	Oberer Buntsandstein			Anisian		Anisian	30-40°N	17	0.367647		tropical_summerwet	manual	tropical_summerwet
2128	466	187	375	Bayerische Staatssammlung für Paläontologie und Geologie, Munich			Anomopteris	mougeotii		BRONGNIART						Anomopteris	mougeotii		Brongniart, 1828	Osmundaceae	Osmundales	Pteridophyta	Osmundales	Germany		Beckingen, Saar	49.3926	6.70224	Locality	Beckingen	Northern Phyllite Zone	Anglo-Saxonia	240	-6.63	20.38	Europe	Buntsandstein			lower Anisian		Anisian	30-40°N	146	1	tropical_summerwet		calculated	tropical_summerwet
2129	766	651	376	Bayerische Staatssammlung für Paläontologie und Geologie, Munich		?	Bjuvia		sp.						?	Bjuvia		sp.		incertae sedis	Cycadales	Cycadophyta	Cycadales	Italy	Bozen/Bolzano	Schgagul Alpe Dolomiten	46.519	11.5363	Locality	Schgaguler Alm/Malga Scagul	Carnic Alps - South Karawanken	Western Europe - Alps	240	-4.104	13.174	Europe	Wengen/La Valle Formation			upper Ladinian		Ladinian	20-30°N				tropical_summerwet	manual	tropical_summerwet
2130	764	744	377	Bayerische Staatssammlung für Paläontologie und Geologie, Munich		?	Bjuvia		sp.						?	Bjuvia		sp.		incertae sedis	Cycadales	Cycadophyta	Cycadales	Italy	Bozen/Bolzano	Corvara Enneberg	46.5525	11.8732	Locality	Corvara	Carnic Alps - South Karawanken	Western Europe - Alps	240	-3.874	13.24	Europe	Wengen/la Valle Formation			upper Ladinian		Ladinian	20-30°N	207	1	tropical_summerwet		calculated	tropical_summerwet
2132	879	323	379	Bayerische Staatssammlung für Paläontologie und Geologie, Munich			Chelepteris	wachtleri		FRANKE, 1937						Chelepteris	wachtleri		Franke, 1937	incertae sedis	incertae sedis	Pteridophyta	Pteridophyta incertae sedis	Germany	Unterfranken	Faulenberg b. Würzburg	49.7913	9.95336	City	Würzburg	Saxo-Thuringian	Anglo-Saxonia	240	-4.725	21.578	Europe	Erfurt Formation			upper Ladinian		Ladinian	30-40°N	802	1	tropical_summerwet		calculated	tropical_summerwet
2133	878	324	380	Bayerische Staatssammlung für Paläontologie und Geologie, Munich			Chiropteris	digitata		KURR, 1863						Chiropteris	digitata		Kurr, 1858	incertae sedis	incertae sedis	Pteridophyta	Pteridophyta incertae sedis	Germany	Unterfranken	Estenfeld b. Würzburg	49.8292	10.0059	Locality		Saxo-Thuringian	Anglo-Saxonia	240	-4.595	21.599	Europe	Erfurt Formation			upper Ladinian		Ladinian	30-40°N	712	1	tropical_summerwet		calculated	tropical_summerwet
2134	417	24	381	Bayerische Staatssammlung für Paläontologie und Geologie, Munich			Cladophlebis	Rütimeyeri								Cladophlebis	ruetimeyeri		(Heer) Leonardi, 1953	Osmundaceae	Osmundales	Pteridophyta	Osmundales	Germany	Franken	Schleerieth bei Würzburg	50.0175	10.098	Locality	Schleerieth	Saxo-Thuringian	Anglo-Saxonia	240	-4.734	21.823	Europe	Lettenkohlesandstein			upper Ladinian		Ladinian	30-40°N	593	1	tropical_summerwet		calculated	tropical_summerwet
2135	1127	403	382	Bayerische Staatssammlung für Paläontologie und Geologie, Munich			Danaeopsis	marantaceae								Danaeopsis	marantaceae		(Presl in Sternberg, 1838) Schimper, 1869	Marattiaceae	Marattiales	Pteridophyta	Marattiales	Germany		Rudelshausen bei Schweinfurt	50.0491	10.2212	Area	Schweinfurt	Saxo-Thuringian	Anglo-Saxonia	240	-4.67	21.884	Europe	Lettenkeuper			upper Ladinian		Ladinian	30-40°N	582	1	tropical_summerwet		calculated	tropical_summerwet
2137	878	324	380	Bayerische Staatssammlung für Paläontologie und Geologie, Munich			Danaeopsis	marantaceae								Danaeopsis	marantaceae		(Presl in Sternberg, 1838) Schimper, 1869	Marattiaceae	Marattiales	Pteridophyta	Marattiales	Germany	Unterfranken	Estenfeld b. Würzburg	49.8292	10.0059	Locality		Saxo-Thuringian	Anglo-Saxonia	240	-4.595	21.599	Europe	Erfurt Formation			upper Ladinian		Ladinian	30-40°N	712	1	tropical_summerwet		calculated	tropical_summerwet
2138	878	324	380	Bayerische Staatssammlung für Paläontologie und Geologie, Munich			Taeniopteris	marantacea		PRESL, 1858						Danaeopsis	marantaceae		(Presl in Sternberg, 1838) Schimper, 1869	Marattiaceae	Marattiales	Pteridophyta	Marattiales	Germany	Unterfranken	Estenfeld b. Würzburg	49.8292	10.0059	Locality		Saxo-Thuringian	Anglo-Saxonia	240	-4.595	21.599	Europe	Erfurt Formation			upper Ladinian		Ladinian	30-40°N	712	1	tropical_summerwet		calculated	tropical_summerwet
2139	1127	403	382	Bayerische Staatssammlung für Paläontologie und Geologie, Munich			Danaeopsis		sp.							Danaeopsis		sp.		Marattiaceae	Marattiales	Pteridophyta	Marattiales	Germany		Rudelshausen bei Schweinfurt	50.0491	10.2212	Area	Schweinfurt	Saxo-Thuringian	Anglo-Saxonia	240	-4.67	21.884	Europe	Lettenkeuper			upper Ladinian		Ladinian	30-40°N	582	1	tropical_summerwet		calculated	tropical_summerwet
2140	858	684	384	Bayerische Staatssammlung für Paläontologie und Geologie, Munich			Danaeopsis		sp.							Danaeopsis		sp.		Marattiaceae	Marattiales	Pteridophyta	Marattiales	Germany	Franken	Schweinfurt	50.0498	10.2206	Locality		Saxo-Thuringian	Anglo-Saxonia	240	-4.671	21.885	Europe	Lettenkohle Trias			upper Ladinian		Ladinian	30-40°N	582	1	tropical_summerwet		calculated	tropical_summerwet
2141	1130	405	385	Bayerische Staatssammlung für Paläontologie und Geologie, Munich			Danaeopsis		sp.							Danaeopsis		sp.		Marattiaceae	Marattiales	Pteridophyta	Marattiales	Germany	Württemberg	Stuttgart	48.7758	9.18293	Locality		Moldanubian	Anglo-Saxonia	240	-4.777	20.446	Europe	Lettenkeuper			upper Ladinian		Ladinian	30-40°N	575	1	tropical_summerwet		calculated	tropical_summerwet
2142	878	324	380	Bayerische Staatssammlung für Paläontologie und Geologie, Munich			Dioonitocarpidium	pennaeformis		SCHENK						Dioonitocarpidium	pennaeformis		(Schenk) Rühle von Lilienstern, 1928	incertae sedis	Cycadales	Cycadophyta	Cycadales	Germany	Unterfranken	Estenfeld b. Würzburg	49.8292	10.0059	Locality		Saxo-Thuringian	Anglo-Saxonia	240	-4.595	21.599	Europe	Erfurt Formation			upper Ladinian		Ladinian	30-40°N	712	1	tropical_summerwet		calculated	tropical_summerwet
2143	1420	485	386	Bayerische Staatssammlung für Paläontologie und Geologie, Munich			Equisetites	arenaceus								Equisetites	arenaceus		(Jaeger, 1827) Schenk, 1864	Equisetaceae	Equisetales	Sphenophyta	Equisetales	Germany		Veitshöchheim, Bl. 6125 WÜ Nord	49.8313	9.88043	Locality	Veitshöchheim	Saxo-Thuringian	Anglo-Saxonia	240	-4.789	21.595	Europe	Lettenkohlekeuper			upper Ladinian		Ladinian	30-40°N	802	1	tropical_summerwet		calculated	tropical_summerwet
2144	417	24	381	Bayerische Staatssammlung für Paläontologie und Geologie, Munich			Equisetites	arenaceus								Equisetites	arenaceus		(Jaeger, 1827) Schenk, 1864	Equisetaceae	Equisetales	Sphenophyta	Equisetales	Germany	Franken	Schleerieth bei Würzburg	50.0175	10.098	Locality	Schleerieth	Saxo-Thuringian	Anglo-Saxonia	240	-4.734	21.823	Europe	Lettenkohlesandstein			upper Ladinian		Ladinian	30-40°N	593	1	tropical_summerwet		calculated	tropical_summerwet
2145	417	24	387	Bayerische Staatssammlung für Paläontologie und Geologie, Munich			Equisetites	arenaceus								Equisetites	arenaceus		(Jaeger, 1827) Schenk, 1864	Equisetaceae	Equisetales	Sphenophyta	Equisetales	Germany	Franken	Schleerieth bei Würzburg	50.0175	10.098	Locality	Schleerieth	Saxo-Thuringian	Anglo-Saxonia	240	-4.734	21.823	Europe	Lettenkohlewerksandstein			upper Ladinian		Ladinian	30-40°N	593	1	tropical_summerwet		calculated	tropical_summerwet
2146	858	684	388	Bayerische Staatssammlung für Paläontologie und Geologie, Munich			Equisetites	arenaceus								Equisetites	arenaceus		(Jaeger, 1827) Schenk, 1864	Equisetaceae	Equisetales	Sphenophyta	Equisetales	Germany	Franken	Schweinfurt	50.0498	10.2206	Locality		Saxo-Thuringian	Anglo-Saxonia	240	-4.671	21.885	Europe	Unterkeuper, Lettenkohle			upper Ladinian		Ladinian	30-40°N	582	1	tropical_summerwet		calculated	tropical_summerwet
2147	879	323	389	Bayerische Staatssammlung für Paläontologie und Geologie, Munich			Equisetites	arenaceus								Equisetites	arenaceus		(Jaeger, 1827) Schenk, 1864	Equisetaceae	Equisetales	Sphenophyta	Equisetales	Germany	Unterfranken	Faulenberg b. Würzburg	49.7913	9.95336	City	Würzburg	Saxo-Thuringian	Anglo-Saxonia	240	-4.725	21.578	Europe	Lettenkohlesandstein			upper Ladinian		Ladinian	30-40°N	802	1	tropical_summerwet		calculated	tropical_summerwet
2148	858	684	384	Bayerische Staatssammlung für Paläontologie und Geologie, Munich			Equisetites		sp.							Equisetites		sp.		Equisetaceae	Equisetales	Sphenophyta	Equisetales	Germany	Franken	Schweinfurt	50.0498	10.2206	Locality		Saxo-Thuringian	Anglo-Saxonia	240	-4.671	21.885	Europe	Lettenkohle Trias			upper Ladinian		Ladinian	30-40°N	582	1	tropical_summerwet		calculated	tropical_summerwet
2149	858	684	390	Bayerische Staatssammlung für Paläontologie und Geologie, Munich			Lepacyclotes		sp.							Lepacyclotes		sp.		Pleuromeiaceae	Pleuromeiales	Lycophyta	Pleuromeiales	Germany	Franken	Schweinfurt	50.0498	10.2206	Locality		Saxo-Thuringian	Anglo-Saxonia	240	-4.671	21.885	Europe	Lettenkohle			upper Ladinian		Ladinian	30-40°N	582	1	tropical_summerwet		calculated	tropical_summerwet
2152	417	24	392	Bayerische Staatssammlung für Paläontologie und Geologie, Munich			Neocalamites	merianii								Neocalamites	merianii		(Brongniart, 1828) Halle, 1908	Equisetaceae	Equisetales	Sphenophyta	Equisetales	Germany	Franken	Schleerieth bei Würzburg	50.0175	10.098	Locality	Schleerieth	Saxo-Thuringian	Anglo-Saxonia	240	-4.734	21.823	Europe	Unterkeuper			upper Ladinian		Ladinian	30-40°N	593	1	tropical_summerwet		calculated	tropical_summerwet
2153	537	225	393	Bayerische Staatssammlung für Paläontologie und Geologie, Munich			Neocalamites	merianii								Neocalamites	merianii		(Brongniart, 1828) Halle, 1908	Equisetaceae	Equisetales	Sphenophyta	Equisetales	Germany	Thüringen	Apolda	51.0282	11.5163	Locality	Apolda	Mid-German Crystalline High	Anglo-Saxonia	240	-4.306	23.118	Europe	Lettenkohle-Hauptsandstein			upper Ladinian		Ladinian	30-40°N	1024	1	tropical_summerwet		calculated	tropical_summerwet
2154	1809	578	394	Bayerische Staatssammlung für Paläontologie und Geologie, Munich			Schizoneura	merianii								Neocalamites	merianii		(Brongniart, 1828) Halle, 1908	Equisetaceae	Equisetales	Sphenophyta	Equisetales	Germany	Thüringen	Singen	50.7255	11.0582	Locality		Saxo-Thuringian	Anglo-Saxonia	250	-0.432	21.662	Europe	Mittlerer Buntsandstein, Türingischer Chiotheriensandstein			Olenekian		Olenekian	30-40°N	11	0.318182		tropical_summerwet	manual	tropical_summerwet
2155	879	323	379	Bayerische Staatssammlung für Paläontologie und Geologie, Munich			Schizoneura	merianii								Neocalamites	merianii		(Brongniart, 1828) Halle, 1908	Equisetaceae	Equisetales	Sphenophyta	Equisetales	Germany	Unterfranken	Faulenberg b. Würzburg	49.7913	9.95336	City	Würzburg	Saxo-Thuringian	Anglo-Saxonia	240	-4.725	21.578	Europe	Erfurt Formation			upper Ladinian		Ladinian	30-40°N	802	1	tropical_summerwet		calculated	tropical_summerwet
2156	325	83	395	Bayerische Staatssammlung für Paläontologie und Geologie, Munich			Neuropteridium	elegans								Neuropteridium	elegans		(Brongniart, 1828) Schimper in Schimper et Schenk, 1879	Osmundaceae	Osmundales	Pteridophyta	Osmundales	France	Alsace	Soultz-les-Bain	48.5682	7.47788	Locality	Soultz-les-Bains	Saxo-Thuringian	Anglo-Saxonia	240	-5.793	19.813	Europe	Buntsandstein	Voltziensandstein, Oberer Buntsansdstein		lower Anisian		Anisian	20-30°N	432	1	tropical_summerwet		calculated	tropical_summerwet
2157	472	190	396	Bayerische Staatssammlung für Paläontologie und Geologie, Munich			Neuropteridium	voltzi		(Brongniart) Blanckenhorn						Neuropteridium	voltzii		(Brongniart, 1828) Schimper, 1879	Osmundaceae	Osmundales	Pteridophyta	Osmundales	Germany		Flosdorf bei Zülpich	50.6938	6.65499	City	Zülpich	South-West Avalonia	Anglo-Saxonia	240	-7.192	21.57	Europe	Buntsandstein			lower Anisian		Anisian	30-40°N	58	1	tropical_summerwet		calculated	tropical_summerwet
2160	1853	593	399	Bayerische Staatssammlung für Paläontologie und Geologie, Munich			Pagiophyllu		sp.							Pagiophyllum		sp.		incertae sedis	Coniferales	Coniferophyta	Coniferales	Germany		Weidenberger Kühn	49.9413	11.7229	Locality	Weidenberg	Saxo-Thuringian	Anglo-Saxonia	240	-3.675	22.19	Europe	Unterer/mittlere Muschlekalk (Orbicularis Schichten)			lower Ladinian		Ladinian	30-40°N	216	1	tropical_summerwet		calculated	tropical_summerwet
2161	987	365	400	Bayerische Staatssammlung für Paläontologie und Geologie, Munich			Pecopteris		sp.							Pecopteris		sp.		Osmundaceae	Osmundales	Pteridophyta	Osmundales	Italy	Belluno	Monte Sief	46.5012	11.9542	Locality	Monte Sief	Carnic Alps - South Karawanken	Western Europe - Alps	250	-0.948	12.299	Europe	Trias Wengener Schichten,			Olenekian		Olenekian	20-30°N	4	0.341667		tropical_summerwet	manual	tropical_summerwet
2162	304	727	401	Bayerische Staatssammlung für Paläontologie und Geologie, Munich			Yuccites		sp.							Pelourdea		sp.		incertae sedis	incertae sedis	Coniferophyta	Coniferophyta incertae sedis	France	Alsace		48.3548	7.45683	Region	Province Elsass	Saxo-Thuringian	Anglo-Saxonia	240	-5.719	19.611	Europe	Buntsandstein	Voltziensandstein, Oberer Buntsansdstein		lower Anisian		Anisian	20-30°N	344	1	tropical_summerwet		calculated	tropical_summerwet
2163	1809	578	402	Bayerische Staatssammlung für Paläontologie und Geologie, Munich			Pleuromeia	sternbergi								Pleuromeia	sternbergii		(Münster, 1839) Corda ex Giebel, 1853	Pleuromeiaceae	Pleuromeiales	Lycophyta	Pleuromeiales	Germany	Thüringen	Singen	50.7255	11.0582	Locality		Saxo-Thuringian	Anglo-Saxonia	250	-0.432	21.662	Europe	Mittlerer Buntsandstein			Olenekian		Olenekian	30-40°N	11	0.318182		tropical_summerwet	manual	tropical_summerwet
2166	2007	359	404	Bayerische Staatssammlung für Paläontologie und Geologie, Munich		cf.	Pseudovoltzia		sp.						cf.	Pseudovoltzia		sp.		Majonicaceae	Voltziales	Coniferophyta	Voltziales	Italy	Bozen	Bletterbach, unterhalb Wasserfall	46.3612	11.4169	Locality	Bletterbach	Carnic Alps - South Karawanken	Western Europe - Alps	250	-1.32	12.144	Europe	Gröden/Val Gardena Sandstein			Wuchiapingian		Wuchiapingian	20-30°N				subtropical_desert	manual	subtropical_desert
2167	2050	651	405	Bayerische Staatssammlung für Paläontologie und Geologie, Munich			Pterophyllum		sp.							Pterophyllum		sp.		incertae sedis	Bennettitales?	Cycadophyta	Bennettitales	Italy	Bozen/Bolzano	Scagul am Pitz-Bach, Südtirol,	46.519	11.5363	Locality	Schgaguler Alm/Malga Scagul	Carnic Alps - South Karawanken	Western Europe - Alps	240	-4.104	13.174	Europe	Wengen/la Valle Formation			upper Ladinian		Ladinian	20-30°N	207	1	tropical_summerwet		calculated	tropical_summerwet
2168	1297	445	406	Bayerische Staatssammlung für Paläontologie und Geologie, Munich			Pilozamites	heeri								Ptilozamites	heeri		Nathorst, 1878	incertae sedis	incertae sedis	Pteridospermatophyta	Pteridospermatophyta incertae sedis	Italy	Bozen/Bolzano	Puflatsch/Bullaccia	46.5658	11.5612	Locality	Puflatsch/Bullaccia	Carnic Alps - South Karawanken	Western Europe - Alps	240	-4.094	13.222	Europe	Buchensteiner Schichten			lower Ladinian		Ladinian	20-30°N	207	1	tropical_summerwet		calculated	tropical_summerwet
2169	2072	660	407	Bayerische Staatssammlung für Paläontologie und Geologie, Munich			Pilozamites	heeri								Ptilozamites	heeri		Nathorst, 1878	incertae sedis	incertae sedis	Pteridospermatophyta	Pteridospermatophyta incertae sedis	Italy	Bozen/Bolzano	Wengen, Südtirol	46.6587	11.9284	Locality	Wengen/La Valle	Carnic Alps - South Karawanken	Western Europe - Alps	240	-3.851	13.351	Europe	Wengen/la Valle Formation			upper Ladinian		Ladinian	20-30°N	207	1	tropical_summerwet		calculated	tropical_summerwet
2173	2141	101	408	Bayerische Staatssammlung für Paläontologie und Geologie, Munich			Schizoneura	paradoxa								Schizoneura	paradoxa		(Schimper et Mougeot) Grauvogel-Stamm, 1978	Equisetaceae	Equisetales	Sphenophyta	Equisetales	France		Vilsberg (Moselle)	48.7855	7.25499	Locality	Vilsberg	Saxo-Thuringian	Anglo-Saxonia	240	-6.026	19.957	Europe	O. Buntsandstein, Voltziensandstein - Werksandstein			lower Anisian		Anisian	20-30°N	432	1	tropical_summerwet		calculated	tropical_summerwet
2174	1809	578	394	Bayerische Staatssammlung für Paläontologie und Geologie, Munich			Schizoneura	paradoxa								Schizoneura	paradoxa		(Schimper et Mougeot) Grauvogel-Stamm, 1978	Equisetaceae	Equisetales	Sphenophyta	Equisetales	Germany	Thüringen	Singen	50.7255	11.0582	Locality		Saxo-Thuringian	Anglo-Saxonia	250	-0.432	21.662	Europe	Mittlerer Buntsandstein, Türingischer Chiotheriensandstein			Olenekian		Olenekian	30-40°N	11	0.318182		tropical_summerwet	manual	tropical_summerwet
2175	472	190	396	Bayerische Staatssammlung für Paläontologie und Geologie, Munich			Crematopteris	typica		Schimper & Mougeot						Scolopendrites	scolopendrioides		(Brongniart, 1828) van Konjinenburg-van Cittert et al., 2006	Osmundaceae	Osmundales	Pteridophyta	Osmundales	Germany		Flosdorf bei Zülpich	50.6938	6.65499	City	Zülpich	South-West Avalonia	Anglo-Saxonia	240	-7.192	21.57	Europe	Buntsandstein			lower Anisian		Anisian	30-40°N	58	1	tropical_summerwet		calculated	tropical_summerwet
2176	2195	697	409	Bayerische Staatssammlung für Paläontologie und Geologie, Munich			Pecopteris	schoenleiniana		Brongniart						Sphenopteris	schoenleiniana		(Brongniart, 1836) Presl, 1838	Sphenopteridaceae	incertae sedis	Pteridophylla	Pteridophylla incertae sedis	Germany		Weißburg an der Brettach, Steinbruck Kern	49.1193	9.52069	Locality	Brettach	Saxo-Thuringian	Anglo-Saxonia	240	-4.707	20.85	Europe	Lettenkohle			upper Ladinian		Ladinian	30-40°N	680	1	tropical_summerwet		calculated	tropical_summerwet
2177	764	744	410	Bayerische Staatssammlung für Paläontologie und Geologie, Munich			Taeniopteris	angustifolia								Taeniopteris	kelberi		Kustatscher et van Konijnenburg-van Cittert, 2010	Taeniopteridaceae	incertae sedis	Pteridophylla	Pteridophylla incertae sedis	Italy	Bozen/Bolzano	Corvara Enneberg	46.5525	11.8732	Locality	Corvara	Carnic Alps - South Karawanken	Western Europe - Alps	240	-3.874	13.24	Europe	Untere Wengener Tuffe			upper Ladinian		Ladinian	20-30°N	207	1	tropical_summerwet		calculated	tropical_summerwet
2178	858	684	384	Bayerische Staatssammlung für Paläontologie und Geologie, Munich			Taeniopteris		sp.							Taeniopteris		sp.		Taeniopteridaceae	incertae sedis	Pteridophylla	Pteridophylla incertae sedis	Germany	Franken	Schweinfurt	50.0498	10.2206	Locality		Saxo-Thuringian	Anglo-Saxonia	240	-4.671	21.885	Europe	Lettenkohle Trias			upper Ladinian		Ladinian	30-40°N	582	1	tropical_summerwet		calculated	tropical_summerwet
2179	417	24	381	Bayerische Staatssammlung für Paläontologie und Geologie, Munich			Todites	gaillardotii								Todites	gaillardotii		(Brongniart, 1828) Kustatscher et van Konijnenburg-van Cittert, 2011	Osmundaceae	Osmundales	Pteridophyta	Osmundales	Germany	Franken	Schleerieth bei Würzburg	50.0175	10.098	Locality	Schleerieth	Saxo-Thuringian	Anglo-Saxonia	240	-4.734	21.823	Europe	Lettenkohlesandstein			upper Ladinian		Ladinian	30-40°N	593	1	tropical_summerwet		calculated	tropical_summerwet
2183	2320	724	413	Bayerische Staatssammlung für Paläontologie und Geologie, Munich			Voltzia	coburgensis		Schauroth						Voltzia	coburgensis		Schauroth	Voltziaceae	Voltziales	Coniferophyta	Voltziales	Germany		Eschenbach	49.7545	11.8304	Locality		Moldanubian	Anglo-Saxonia	240	-3.522	22.05	Europe	Muschelkalk			lower Ladinian		Ladinian	30-40°N	6	0.291667		tropical_summerwet	manual	tropical_summerwet
2184	2320	724	414	Bayerische Staatssammlung für Paläontologie und Geologie, Munich			Voltzia	coburgensis		Schauroth						Voltzia	coburgensis		Schauroth	Voltziaceae	Voltziales	Coniferophyta	Voltziales	Germany		Eschenbach	49.7545	11.8304	Locality		Moldanubian	Anglo-Saxonia	240	-3.522	22.05	Europe	Muschelkalk / Grenzbonebed			lower Ladinian		Ladinian	30-40°N	6	0.291667		tropical_summerwet	manual	tropical_summerwet
2185	1297	445	415	Bayerische Staatssammlung für Paläontologie und Geologie, Munich			Voltia	dolomitica								Voltzia	dolomitica		Wachtler et van Konijnenburg-van Cittert, 2000	Voltziaceae	Voltziales	Coniferophyta	Voltziales	Italy	Bozen/Bolzano	Puflatsch/Bullaccia	46.5658	11.5612	Locality	Puflatsch/Bullaccia	Carnic Alps - South Karawanken	Western Europe - Alps	240	-4.094	13.222	Europe	Obere Buchensteiner Schichten			lower Ladinian		Ladinian	20-30°N	207	1	tropical_summerwet		calculated	tropical_summerwet
2186	2328	360	416	Bayerische Staatssammlung für Paläontologie und Geologie, Munich			Voltzia	dolomitica								Voltzia	dolomitica		Wachtler et van Konijnenburg-van Cittert, 2000	Voltziaceae	Voltziales	Coniferophyta	Voltziales	Italy		Ciablun oberhalb Wengen	46.3612	11.4169	Locality	Cercenà	Carnic Alps - South Karawanken	Western Europe - Alps	240	-4.165	13.006	Europe	Wengen/la Valle Formation			upper Ladinian		Ladinian	20-30°N	193	1	tropical_summerwet		calculated	tropical_summerwet
2187	325	83	395	Bayerische Staatssammlung für Paläontologie und Geologie, Munich			Voltzia	acutifolia								Voltzia	heterophylla		Brongniart, 1828	Voltziaceae	Voltziales	Coniferophyta	Voltziales	France	Alsace	Soultz-les-Bain	48.5682	7.47788	Locality	Soultz-les-Bains	Saxo-Thuringian	Anglo-Saxonia	240	-5.793	19.813	Europe	Buntsandstein	Voltziensandstein, Oberer Buntsansdstein		lower Anisian		Anisian	20-30°N	432	1	tropical_summerwet		calculated	tropical_summerwet
2188	325	83	395	Bayerische Staatssammlung für Paläontologie und Geologie, Munich			Voltzia	heterophylla								Voltzia	heterophylla		Brongniart, 1828	Voltziaceae	Voltziales	Coniferophyta	Voltziales	France	Alsace	Soultz-les-Bain	48.5682	7.47788	Locality	Soultz-les-Bains	Saxo-Thuringian	Anglo-Saxonia	240	-5.793	19.813	Europe	Buntsandstein	Voltziensandstein, Oberer Buntsansdstein		lower Anisian		Anisian	20-30°N	432	1	tropical_summerwet		calculated	tropical_summerwet
2189	2341	733	417	Bayerische Staatssammlung für Paläontologie und Geologie, Munich			Voltzia	heterophylla								Voltzia	heterophylla		Brongniart, 1828	Voltziaceae	Voltziales	Coniferophyta	Voltziales	Germany		Messing - Pfalz (Steinbruch Brill)	49.4822	7.86095	Region		Mid-German Crystalline High	Anglo-Saxonia	240	-5.924	20.752	Europe	Buntsandstein			lower Anisian		Anisian	30-40°N	229	1	tropical_summerwet		calculated	tropical_summerwet
2192	1760	652	419	Bayerische Staatssammlung für Paläontologie und Geologie, Munich			Voltzia	hungarica		Heer						Voltzia	hungarica		Heer	Voltziaceae	Voltziales	Coniferophyta	Voltziales	Italy	Dolomites	Duffalm, Völs am Schlern	46.519	11.5363	Locality		Carnic Alps - South Karawanken	Western Europe - Alps	250	-1.243	12.305	Europe	Oberer Perm - Grödner Sandstein			Wuchiapingian		Wuchiapingian	20-30°N	94	1	subtropical_desert		calculated	subtropical_desert
2193	304	727	420	Bayerische Staatssammlung für Paläontologie und Geologie, Munich			Voltzia		sp.							Voltzia		sp.		Voltziaceae	Voltziales	Coniferophyta	Voltziales	France	Alsace		48.3548	7.45683	Region	Province Elsass	Saxo-Thuringian	Anglo-Saxonia	240	-5.719	19.611	Europe	Buntsandstein	Voltziensandstein, Oberer Buntsansdstein		lower Anisian		Anisian	20-30°N	344	1	tropical_summerwet		calculated	tropical_summerwet
2194	2306	718	421	Bayerische Staatssammlung für Paläontologie und Geologie, Munich			Voltzia		sp.							Voltzia		sp.		Voltziaceae	Voltziales	Coniferophyta	Voltziales	Italy		Aschkler Alpe	46.5794	11.7158	Area		Carnic Alps - South Karawanken	Western Europe - Alps	240	-3.987	13.251	Europe	Wengen/la Valle Formation			upper Ladinian		Ladinian	20-30°N	207	1	tropical_summerwet		calculated	tropical_summerwet
2195	2308	720	422	Bayerische Staatssammlung für Paläontologie und Geologie, Munich			Voltzia		sp.							Voltzia		sp.		Voltziaceae	Voltziales	Coniferophyta	Voltziales	Italy	Bozen/Bolzano	Gardenazzamassiv, Gröden	46.604	11.8966	Area		Carnic Alps - South Karawanken	Western Europe - Alps	240	-3.864	13.293	Europe	Wengen/la Valle Formation			upper Ladinian		Ladinian	20-30°N	207	1	tropical_summerwet		calculated	tropical_summerwet
2196	2309	651	423	Bayerische Staatssammlung für Paläontologie und Geologie, Munich			Voltzia		sp.							Voltzia		sp.		Voltziaceae	Voltziales	Coniferophyta	Voltziales	Italy	Bozen/Bolzano	Seegul, Alpe di Siusi	46.519	11.5363	Locality	Seiser Alm/Alpe di Siusi	Carnic Alps - South Karawanken	Western Europe - Alps	240	-4.104	13.174	Europe	Wengen/la Valle Formation			upper Ladinian		Ladinian	20-30°N	207	1	tropical_summerwet		calculated	tropical_summerwet
2198	2228	24	425	Bayerische Staatssammlung für Paläontologie und Geologie, Munich			Todites	gaillardotii								Todites	gaillardotii		(Brongniart, 1828) Kustatscher et van Konijnenburg-van Cittert, 2011	Osmundaceae	Osmundales	Pteridophyta	Osmundales	Germany	Bayern	Schleerith bei Schweinfurt	50.0175	10.098	Locality	Schleerieth	Saxo-Thuringian	Anglo-Saxonia	240	-4.734	21.823	Europe	Lettenkohlesandstein		1983I	Upper Ladinian		Ladinian	30-40°N	593	1	tropical_summerwet		calculated	tropical_summerwet
2201	878	324	428	Bayerische Staatssammlung für Paläontologie und Geologie, Munich			Taeniopteris	marantacea		PRESL, 1858						Danaeopsis	marantaceae		(Presl in Sternberg, 1838) Schimper, 1869	Marattiaceae	Marattiales	Pteridophyta	Marattiales	Germany	Unterfranken	Estenfeld b. Würzburg	49.8292	10.0059	Locality		Saxo-Thuringian	Anglo-Saxonia	240	-4.595	21.599	Europe	Lettenkohle-Sandst.		925+D2264	Upper Ladinian		Ladinian	30-40°N	712	1	tropical_summerwet		calculated	tropical_summerwet
2202	878	324	428	Bayerische Staatssammlung für Paläontologie und Geologie, Munich			Danaeopsis	marantacea								Danaeopsis	marantaceae		(Presl in Sternberg, 1838) Schimper, 1869	Marattiaceae	Marattiales	Pteridophyta	Marattiales	Germany	Unterfranken	Estenfeld b. Würzburg	49.8292	10.0059	Locality		Saxo-Thuringian	Anglo-Saxonia	240	-4.595	21.599	Europe	Lettenkohle-Sandst.		E3748	Upper Ladinian		Ladinian	30-40°N	712	1	tropical_summerwet		calculated	tropical_summerwet
2203	878	324	428	Bayerische Staatssammlung für Paläontologie und Geologie, Munich			Diooniticarpidium	pennaeformis		SCHENK, 1867				Positiv + Negativ		Dioonitocarpidium	pennaeformis		(Schenk) Rühle von Lilienstern, 1928	incertae sedis	Cycadales	Cycadophyta	Cycadales	Germany	Unterfranken	Estenfeld b. Würzburg	49.8292	10.0059	Locality		Saxo-Thuringian	Anglo-Saxonia	240	-4.595	21.599	Europe	Lettenkohle-Sandst.		E3902	Upper Ladinian		Ladinian	30-40°N	712	1	tropical_summerwet		calculated	tropical_summerwet
2207	878	324	428	Bayerische Staatssammlung für Paläontologie und Geologie, Munich			Chiropteris	digitata		KURR, 1859	P.237, pl. 7, fig. 8		Pal. Z. 1931			Chiropteris	digitata		Kurr, 1858	incertae sedis	incertae sedis	Pteridophyta	Pteridophyta incertae sedis	Germany	Unterfranken	Estenfeld b. Würzburg	49.8292	10.0059	Locality		Saxo-Thuringian	Anglo-Saxonia	240	-4.595	21.599	Europe	Lettenkohle-Sandst.		F3734	Upper Ladinian		Ladinian	30-40°N	712	1	tropical_summerwet		calculated	tropical_summerwet
2208	878	324	428	Bayerische Staatssammlung für Paläontologie und Geologie, Munich			Chelepteris	strongylopeltis		SCHENK	P.237, pl. 7, fig. 6		?......, 1864; Taf. VII; Fig. 1			Chelepteris	strongylopeltis		Schenk	incertae sedis	incertae sedis	Pteridophyta	Pteridophyta incertae sedis	Germany	Unterfranken	Estenfeld b. Würzburg	49.8292	10.0059	Locality		Saxo-Thuringian	Anglo-Saxonia	240	-4.595	21.599	Europe	Lettenkohle-Sandst.		F933	Upper Ladinian		Ladinian	30-40°N	712	1	tropical_summerwet		calculated	tropical_summerwet
2209	682	412	431	Bayerisches Landesamt für Umwelt, Munich			Alethopteris	meriani		Brongniart						Asterotheca	merianii		(Brongniart, 1828) Stur, 1885	Asterothecaceae	Marattiales	Pteridophyta	Marattiales	Germany	Würzburg	Erlach bei Ochsenfurt	49.7062	10.0801	Locality		Saxo-Thuringian	Anglo-Saxonia	240	-4.607	21.534	Europe	Lettenkohlesandstein			upper Ladinian		Ladinian	30-40°N	787	1	tropical_summerwet		calculated	tropical_summerwet
2210	682	412	432	Bayerisches Landesamt für Umwelt, Munich			Carpolithes	amygdalinus		Schenk						Carpolithes	amygdalinus		Schenk	incertae sedis	incertae sedis	Gymnospermae	Gymnospermae incertae sedis	Germany	Würzburg	Erlach bei Ochsenfurt	49.7062	10.0801	Locality		Saxo-Thuringian	Anglo-Saxonia	240	-4.607	21.534	Europe	Lettenkohle			upper Ladinian		Ladinian	30-40°N	787	1	tropical_summerwet		calculated	tropical_summerwet
2211	858	684	433	Bayerisches Landesamt für Umwelt, Munich			Carpolithes	keuperiana								Carpolithes	keuperianus		Schenk	incertae sedis	incertae sedis	Gymnospermae	Gymnospermae incertae sedis	Germany	Franken	Schweinfurt	50.0498	10.2206	Locality		Saxo-Thuringian	Anglo-Saxonia	240	-4.671	21.885	Europe		Unterer Keuper		upper Ladinian		Ladinian	30-40°N	582	1	tropical_summerwet		calculated	tropical_summerwet
2212	682	412	431	Bayerisches Landesamt für Umwelt, Munich			Carpolithes	maximus								Carpolithes	maximus			incertae sedis	incertae sedis	Gymnospermae	Gymnospermae incertae sedis	Germany	Würzburg	Erlach bei Ochsenfurt	49.7062	10.0801	Locality		Saxo-Thuringian	Anglo-Saxonia	240	-4.607	21.534	Europe	Lettenkohlesandstein			upper Ladinian		Ladinian	30-40°N	787	1	tropical_summerwet		calculated	tropical_summerwet
2213	682	412	432	Bayerisches Landesamt für Umwelt, Munich			Neuropteris	remota								Cladophlebis	remota		(Presl in Sternberg, 1838) Van Konijnenburg-van Cittert et al. 2006	Osmundaceae	Osmundales	Pteridophyta	Osmundales	Germany	Würzburg	Erlach bei Ochsenfurt	49.7062	10.0801	Locality		Saxo-Thuringian	Anglo-Saxonia	240	-4.607	21.534	Europe	Lettenkohle			upper Ladinian		Ladinian	30-40°N	787	1	tropical_summerwet		calculated	tropical_summerwet
2214	682	412	431	Bayerisches Landesamt für Umwelt, Munich			Neuropteris	remota								Cladophlebis	remota		(Presl in Sternberg, 1838) Van Konijnenburg-van Cittert et al. 2006	Osmundaceae	Osmundales	Pteridophyta	Osmundales	Germany	Würzburg	Erlach bei Ochsenfurt	49.7062	10.0801	Locality		Saxo-Thuringian	Anglo-Saxonia	240	-4.607	21.534	Europe	Lettenkohlesandstein			upper Ladinian		Ladinian	30-40°N	787	1	tropical_summerwet		calculated	tropical_summerwet
2215	878	324	434	Bayerisches Landesamt für Umwelt, Munich			Cycadites	rumpfii								Scytophyllum	rumpfii		Schenk	Peltaspermaceae	Peltaspermales	Pteridospermatophyta	Peltaspermales	Germany	Unterfranken	Estenfeld b. Würzburg	49.8292	10.0059	Locality		Saxo-Thuringian	Anglo-Saxonia	240	-4.595	21.599	Europe	Lettenkohle			upper Ladinian		Ladinian	30-40°N	712	1	tropical_summerwet		calculated	tropical_summerwet
2216	1102	396	435	Bayerisches Landesamt für Umwelt, Munich		cf.	Cycadites	rumpfii		Schenk					cf.	Scytophyllum	rumpfii		Schenk	Peltaspermaceae	Peltaspermales	Pteridospermatophyta	Peltaspermales	Germany		Kromingen	50.1659	10.1595	Locality	Rottershausen	Saxo-Thuringian	Anglo-Saxonia	240	-4.761	21.974	Europe	Unterer Keuper			upper Ladinian		Ladinian	30-40°N	597	1	tropical_summerwet		calculated	tropical_summerwet
2217	1104	397	436	Bayerisches Landesamt für Umwelt, Munich		cf.	Cycadites	rumpfii		Schenk					cf.	Scytophyllum	rumpfii		Schenk	Peltaspermaceae	Peltaspermales	Pteridospermatophyta	Peltaspermales	Germany	Unterfranken	Gnötzheim bei Franckenberg	49.6159	10.1833	Locality	Gnötzheim	Saxo-Thuringian	Anglo-Saxonia	240	-4.502	21.479	Europe	Lettenkohlesandstein			upper Ladinian		Ladinian	30-40°N	864	1	tropical_summerwet		calculated	tropical_summerwet
2218	682	412	431	Bayerisches Landesamt für Umwelt, Munich		cf.	Cycadites	rumpfii		Schenk					cf.	Scytophyllum	rumpfii		Schenk	Peltaspermaceae	Peltaspermales	Pteridospermatophyta	Peltaspermales	Germany	Würzburg	Erlach bei Ochsenfurt	49.7062	10.0801	Locality		Saxo-Thuringian	Anglo-Saxonia	240	-4.607	21.534	Europe	Lettenkohlesandstein			upper Ladinian		Ladinian	30-40°N	787	1	tropical_summerwet		calculated	tropical_summerwet
2219	1104	397	437	Bayerisches Landesamt für Umwelt, Munich			Danaeopsis	marantaceae								Danaeopsis	marantaceae		(Presl in Sternberg, 1838) Schimper, 1869	Marattiaceae	Marattiales	Pteridophyta	Marattiales	Germany	Unterfranken	Gnötzheim bei Franckenberg	49.6159	10.1833	Locality	Gnötzheim	Saxo-Thuringian	Anglo-Saxonia	240	-4.502	21.479	Europe	Lettenkohle			upper Ladinian		Ladinian	30-40°N	864	1	tropical_summerwet		calculated	tropical_summerwet
2220	682	412	438	Bayerisches Landesamt für Umwelt, Munich			Danaeopsis	marantaceae								Danaeopsis	marantaceae		(Presl in Sternberg, 1838) Schimper, 1869	Marattiaceae	Marattiales	Pteridophyta	Marattiales	Germany	Würzburg	Erlach bei Ochsenfurt	49.7062	10.0801	Locality		Saxo-Thuringian	Anglo-Saxonia	240	-4.607	21.534	Europe	Unterer Keuper			upper Ladinian		Ladinian	30-40°N	787	1	tropical_summerwet		calculated	tropical_summerwet
2221	1104	397	436	Bayerisches Landesamt für Umwelt, Munich		cf.	Danaeopsis	marantaceae							cf.	Danaeopsis	marantaceae		(Presl in Sternberg, 1838) Schimper, 1869	Marattiaceae	Marattiales	Pteridophyta	Marattiales	Germany	Unterfranken	Gnötzheim bei Franckenberg	49.6159	10.1833	Locality	Gnötzheim	Saxo-Thuringian	Anglo-Saxonia	240	-4.502	21.479	Europe	Lettenkohlesandstein			upper Ladinian		Ladinian	30-40°N	864	1	tropical_summerwet		calculated	tropical_summerwet
2222	1102	396	435	Bayerisches Landesamt für Umwelt, Munich			Dioonitocarpidium	pennaeformis		SCHENK						Dioonitocarpidium	pennaeformis		(Schenk) Rühle von Lilienstern, 1928	incertae sedis	Cycadales	Cycadophyta	Cycadales	Germany		Kromingen	50.1659	10.1595	Locality	Rottershausen	Saxo-Thuringian	Anglo-Saxonia	240	-4.761	21.974	Europe	Unterer Keuper			upper Ladinian		Ladinian	30-40°N	597	1	tropical_summerwet		calculated	tropical_summerwet
2223	682	412	431	Bayerisches Landesamt für Umwelt, Munich			Dioonitocarpidium	pennaeformis		SCHENK						Dioonitocarpidium	pennaeformis		(Schenk) Rühle von Lilienstern, 1928	incertae sedis	Cycadales	Cycadophyta	Cycadales	Germany	Würzburg	Erlach bei Ochsenfurt	49.7062	10.0801	Locality		Saxo-Thuringian	Anglo-Saxonia	240	-4.607	21.534	Europe	Lettenkohlesandstein			upper Ladinian		Ladinian	30-40°N	787	1	tropical_summerwet		calculated	tropical_summerwet
2224	1366	469	439	Bayerisches Landesamt für Umwelt, Munich			Equisetites	arenaceus								Equisetites	arenaceus		(Jaeger, 1827) Schenk, 1864	Equisetaceae	Equisetales	Sphenophyta	Equisetales	Germany		Biebelrieth	49.7643	10.0826	Locality		Saxo-Thuringian	Anglo-Saxonia	240	-4.631	21.588	Europe	Lettenkohlesandstein			upper Ladinian		Ladinian	30-40°N	732	1	tropical_summerwet		calculated	tropical_summerwet
2225	884	685	440	Bayerisches Landesamt für Umwelt, Munich			Equisetites	arenaceus								Equisetites	arenaceus		(Jaeger, 1827) Schenk, 1864	Equisetaceae	Equisetales	Sphenophyta	Equisetales	Germany		Würzburg	49.7913	9.95336	City	Würzburg	Saxo-Thuringian	Anglo-Saxonia	240	-4.725	21.578	Europe	Unterer Keuper			upper Ladinian		Ladinian	30-40°N	802	1	tropical_summerwet		calculated	tropical_summerwet
2226	1369	470	441	Bayerisches Landesamt für Umwelt, Munich			Equisetites	arenaceus								Equisetites	arenaceus		(Jaeger, 1827) Schenk, 1864	Equisetaceae	Equisetales	Sphenophyta	Equisetales	Germany		Deutschhof bei Schweinfurt	50.0667	10.2527	Locality	Deutschhof	Saxo-Thuringian	Anglo-Saxonia	240	-4.658	21.909	Europe	Widdringtonitessandstein - Lettenkohle			upper Ladinian		Ladinian	30-40°N	579	1	tropical_summerwet		calculated	tropical_summerwet
2227	1456	499	442	Bayerisches Landesamt für Umwelt, Munich			Equisetites	arenaceus								Equisetites	arenaceus		(Jaeger, 1827) Schenk, 1864	Equisetaceae	Equisetales	Sphenophyta	Equisetales	Germany	Baden-Württemberg	Eggenhausen	48.5667	8.61813	Locality		Moldanubian	Anglo-Saxonia	240	-5.053	20.106	Europe	Unterer Keuper			upper Ladinian		Ladinian	30-40°N	535	1	tropical_summerwet		calculated	tropical_summerwet
2228	417	24	443	Bayerisches Landesamt für Umwelt, Munich			Equisetites	arenaceus								Equisetites	arenaceus		(Jaeger, 1827) Schenk, 1864	Equisetaceae	Equisetales	Sphenophyta	Equisetales	Germany	Franken	Schleerieth bei Würzburg	50.0175	10.098	Locality	Schleerieth	Saxo-Thuringian	Anglo-Saxonia	240	-4.734	21.823	Europe	Lettenkohle			upper Ladinian		Ladinian	30-40°N	593	1	tropical_summerwet		calculated	tropical_summerwet
2229	878	324	444	Bayerisches Landesamt für Umwelt, Munich			Equisetites	arenaceus								Equisetites	arenaceus		(Jaeger, 1827) Schenk, 1864	Equisetaceae	Equisetales	Sphenophyta	Equisetales	Germany	Unterfranken	Estenfeld b. Würzburg	49.8292	10.0059	Locality		Saxo-Thuringian	Anglo-Saxonia	240	-4.595	21.599	Europe	Lettenkohlesandstein			upper Ladinian		Ladinian	30-40°N	712	1	tropical_summerwet		calculated	tropical_summerwet
2230	879	323	445	Bayerisches Landesamt für Umwelt, Munich			Equisetites	arenaceus								Equisetites	arenaceus		(Jaeger, 1827) Schenk, 1864	Equisetaceae	Equisetales	Sphenophyta	Equisetales	Germany	Unterfranken	Faulenberg b. Würzburg	49.7913	9.95336	City	Würzburg	Saxo-Thuringian	Anglo-Saxonia	240	-4.725	21.578	Europe	Lettenkohlesandstein			upper Ladinian		Ladinian	30-40°N	802	1	tropical_summerwet		calculated	tropical_summerwet
2231	1512	324	446	Bayerisches Landesamt für Umwelt, Munich			Equisetites	arenaceus								Equisetites	arenaceus		(Jaeger, 1827) Schenk, 1864	Equisetaceae	Equisetales	Sphenophyta	Equisetales	Germany	Unterfranken	Estenfeld bei Würzburg	49.8292	10.0059	Locality		Saxo-Thuringian	Anglo-Saxonia	240	-4.595	21.599	Europe	Unterer Keuper			upper Ladinian		Ladinian	30-40°N	712	1	tropical_summerwet		calculated	tropical_summerwet
2232	682	412	432	Bayerisches Landesamt für Umwelt, Munich			Equisetites	arenaceus								Equisetites	arenaceus		(Jaeger, 1827) Schenk, 1864	Equisetaceae	Equisetales	Sphenophyta	Equisetales	Germany	Würzburg	Erlach bei Ochsenfurt	49.7062	10.0801	Locality		Saxo-Thuringian	Anglo-Saxonia	240	-4.607	21.534	Europe	Lettenkohle			upper Ladinian		Ladinian	30-40°N	787	1	tropical_summerwet		calculated	tropical_summerwet
2233	1400	477	447	Bayerisches Landesamt für Umwelt, Munich		cf.	Equisetites	arenaceus							cf.	Equisetites	arenaceus		(Jaeger, 1827) Schenk, 1864	Equisetaceae	Equisetales	Sphenophyta	Equisetales	Germany		Rottendorf, Effeld	51.1239	6.10102	Locality	Effeld	North Avalonia	Anglo-Saxonia	240	-7.716	21.834	Europe		Lettenkohlesandstein		upper Ladinian		Ladinian	30-40°N				tropical_summerwet	manual	tropical_summerwet
2234	1104	397	437	Bayerisches Landesamt für Umwelt, Munich			Neocalamites	merianii								Neocalamites	merianii		(Brongniart, 1828) Halle, 1908	Equisetaceae	Equisetales	Sphenophyta	Equisetales	Germany	Unterfranken	Gnötzheim bei Franckenberg	49.6159	10.1833	Locality	Gnötzheim	Saxo-Thuringian	Anglo-Saxonia	240	-4.502	21.479	Europe	Lettenkohle			upper Ladinian		Ladinian	30-40°N	864	1	tropical_summerwet		calculated	tropical_summerwet
2235	1104	397	436	Bayerisches Landesamt für Umwelt, Munich			Neocalamites	merianii								Neocalamites	merianii		(Brongniart, 1828) Halle, 1908	Equisetaceae	Equisetales	Sphenophyta	Equisetales	Germany	Unterfranken	Gnötzheim bei Franckenberg	49.6159	10.1833	Locality	Gnötzheim	Saxo-Thuringian	Anglo-Saxonia	240	-4.502	21.479	Europe	Lettenkohlesandstein			upper Ladinian		Ladinian	30-40°N	864	1	tropical_summerwet		calculated	tropical_summerwet
2236	879	323	445	Bayerisches Landesamt für Umwelt, Munich			Pterophyllum	acuminatum							?	Pterophyllum	acuminatum			incertae sedis	Bennettitales?	Cycadophyta	Bennettitales	Germany	Unterfranken	Faulenberg b. Würzburg	49.7913	9.95336	City	Würzburg	Saxo-Thuringian	Anglo-Saxonia	240	-4.725	21.578	Europe	Lettenkohlesandstein			upper Ladinian		Ladinian	30-40°N	802	1	tropical_summerwet		calculated	tropical_summerwet
2237	2055	316	448	Bayerisches Landesamt für Umwelt, Munich			Pterophyllum	longifolium		Brongniart						Pterophyllum	filicoides		(Schlotheim, 1822) Zeiller, 1906	incertae sedis	Bennettitales?	Cycadophyta	Bennettitales	Germany		Gnollstadt	49.6405	10.1235	Locality	Gnodstadt	Saxo-Thuringian	Anglo-Saxonia	240	-4.552	21.486	Europe	Lettenkohle			upper Ladinian		Ladinian	30-40°N	864	1	tropical_summerwet		calculated	tropical_summerwet
2238	879	323	445	Bayerisches Landesamt für Umwelt, Munich		?	Pterophyllum	jaegeri		Brongniart					?	Pterophyllum	filicoides		(Schlotheim, 1822) Zeiller, 1906	incertae sedis	Bennettitales?	Cycadophyta	Bennettitales	Germany	Unterfranken	Faulenberg b. Würzburg	49.7913	9.95336	City	Würzburg	Saxo-Thuringian	Anglo-Saxonia	240	-4.725	21.578	Europe	Lettenkohlesandstein			upper Ladinian		Ladinian	30-40°N	802	1	tropical_summerwet		calculated	tropical_summerwet
2239	879	323	445	Bayerisches Landesamt für Umwelt, Munich			Pterophyllum		sp.							Pterophyllum		sp.		incertae sedis	Bennettitales?	Cycadophyta	Bennettitales	Germany	Unterfranken	Faulenberg b. Würzburg	49.7913	9.95336	City	Würzburg	Saxo-Thuringian	Anglo-Saxonia	240	-4.725	21.578	Europe	Lettenkohlesandstein			upper Ladinian		Ladinian	30-40°N	802	1	tropical_summerwet		calculated	tropical_summerwet
2240	682	412	431	Bayerisches Landesamt für Umwelt, Munich			Rhaecophyllum	pachyrachis		Schlotheim						Rhacophyllum	crispatum		(Münster in Sternberg) Kustatscher et van Konijnenburg-van Cittert, 2011	Marattiaceae	Marattiales	Pteridophyta	Marattiales	Germany	Würzburg	Erlach bei Ochsenfurt	49.7062	10.0801	Locality		Saxo-Thuringian	Anglo-Saxonia	240	-4.607	21.534	Europe	Lettenkohlesandstein			upper Ladinian		Ladinian	30-40°N	787	1	tropical_summerwet		calculated	tropical_summerwet
2241	682	412	438	Bayerisches Landesamt für Umwelt, Munich			Rhaecophyllum	pachyrachis		Schlotheim						Rhacophyllum	crispatum		(Münster in Sternberg) Kustatscher et van Konijnenburg-van Cittert, 2011	Marattiaceae	Marattiales	Pteridophyta	Marattiales	Germany	Würzburg	Erlach bei Ochsenfurt	49.7062	10.0801	Locality		Saxo-Thuringian	Anglo-Saxonia	240	-4.607	21.534	Europe	Unterer Keuper			upper Ladinian		Ladinian	30-40°N	787	1	tropical_summerwet		calculated	tropical_summerwet
2242	2130	674	449	Bayerisches Landesamt für Umwelt, Munich			Schistostachyum	thyrsoideum		Schlotheim						Schistostachyum	thyrsoideum		Schenk	incertae sedis	incertae sedis	incertae sedis	incertae sedis incertae sedis	Germany		Brühl bei Castell	49.743	10.349	Area	Castell	Saxo-Thuringian	Anglo-Saxonia	240	-4.453	21.639	Europe	Lettenkohle, Seminodussandstein			upper Ladinian		Ladinian	30-40°N	674	1	tropical_summerwet		calculated	tropical_summerwet
2243	2131	675	450	Bayerisches Landesamt für Umwelt, Munich			Schistostachyum	thyrsoideum		Schlotheim						Schistostachyum	thyrsoideum		Schenk	incertae sedis	incertae sedis	incertae sedis	incertae sedis incertae sedis	Germany		Lämmersdorf bei Arnheim unweit Schweinfurt	50.0492	10.2194	Locality	Schweinfurt	Saxo-Thuringian	Anglo-Saxonia	240	-4.671	21.883	Europe	Unterer Keuper			upper Ladinian		Ladinian	30-40°N	582	1	tropical_summerwet		calculated	tropical_summerwet
2244	1512	324	446	Bayerisches Landesamt für Umwelt, Munich			Schistostachyum	thyrsoideum		Schlotheim						Schistostachyum	thyrsoideum		Schenk	incertae sedis	incertae sedis	incertae sedis	incertae sedis incertae sedis	Germany	Unterfranken	Estenfeld bei Würzburg	49.8292	10.0059	Locality		Saxo-Thuringian	Anglo-Saxonia	240	-4.595	21.599	Europe	Unterer Keuper			upper Ladinian		Ladinian	30-40°N	712	1	tropical_summerwet		calculated	tropical_summerwet
2245	682	412	431	Bayerisches Landesamt für Umwelt, Munich			Schizolepis	pachyrachis		Schenk						Schizolepis	pachyrachis		Schenk	incertae sedis	Voltziales	Coniferophyta	Voltziales	Germany	Würzburg	Erlach bei Ochsenfurt	49.7062	10.0801	Locality		Saxo-Thuringian	Anglo-Saxonia	240	-4.607	21.534	Europe	Lettenkohlesandstein			upper Ladinian		Ladinian	30-40°N	787	1	tropical_summerwet		calculated	tropical_summerwet
2246	1104	397	436	Bayerisches Landesamt für Umwelt, Munich			Silerophyllina	furcata								Sclerophyllina	furcata		Heer	incertae sedis	incertae sedis	incertae sedis	incertae sedis incertae sedis	Germany	Unterfranken	Gnötzheim bei Franckenberg	49.6159	10.1833	Locality	Gnötzheim	Saxo-Thuringian	Anglo-Saxonia	240	-4.502	21.479	Europe	Lettenkohlesandstein			upper Ladinian		Ladinian	30-40°N	864	1	tropical_summerwet		calculated	tropical_summerwet
2247	682	412	431	Bayerisches Landesamt für Umwelt, Munich			Sphenopteris	schoenleiniana								Sphenopteris	schoenleiniana		(Brongniart, 1836) Presl, 1838	Sphenopteridaceae	incertae sedis	Pteridophylla	Pteridophylla incertae sedis	Germany	Würzburg	Erlach bei Ochsenfurt	49.7062	10.0801	Locality		Saxo-Thuringian	Anglo-Saxonia	240	-4.607	21.534	Europe	Lettenkohlesandstein			upper Ladinian		Ladinian	30-40°N	787	1	tropical_summerwet		calculated	tropical_summerwet
2248	1140	437	451	Bayerisches Landesamt für Umwelt, Munich			Taeniopteris	angustifolia								Taeniopteris	kelberi		Kustatscher et van Konijnenburg-van Cittert, 2010	Taeniopteridaceae	incertae sedis	Pteridophylla	Pteridophylla incertae sedis	Germany		Ochsenfurt	49.664	10.0709	Locality	Ochsenfurt	Saxo-Thuringian	Anglo-Saxonia	240	-4.595	21.493	Europe	Lettenkohlesandstein			upper Ladinian		Ladinian	30-40°N	932	1	tropical_summerwet		calculated	tropical_summerwet
2249	879	323	445	Bayerisches Landesamt für Umwelt, Munich			Taeniopteris	angustifolia								Taeniopteris	kelberi		Kustatscher et van Konijnenburg-van Cittert, 2010	Taeniopteridaceae	incertae sedis	Pteridophylla	Pteridophylla incertae sedis	Germany	Unterfranken	Faulenberg b. Würzburg	49.7913	9.95336	City	Würzburg	Saxo-Thuringian	Anglo-Saxonia	240	-4.725	21.578	Europe	Lettenkohlesandstein			upper Ladinian		Ladinian	30-40°N	802	1	tropical_summerwet		calculated	tropical_summerwet
2250	682	412	432	Bayerisches Landesamt für Umwelt, Munich			Taeniopteris	angustifolia								Taeniopteris	kelberi		Kustatscher et van Konijnenburg-van Cittert, 2010	Taeniopteridaceae	incertae sedis	Pteridophylla	Pteridophylla incertae sedis	Germany	Würzburg	Erlach bei Ochsenfurt	49.7062	10.0801	Locality		Saxo-Thuringian	Anglo-Saxonia	240	-4.607	21.534	Europe	Lettenkohle			upper Ladinian		Ladinian	30-40°N	787	1	tropical_summerwet		calculated	tropical_summerwet
2251	682	412	431	Bayerisches Landesamt für Umwelt, Munich			Taeniopteris	angustifolia								Taeniopteris	kelberi		Kustatscher et van Konijnenburg-van Cittert, 2010	Taeniopteridaceae	incertae sedis	Pteridophylla	Pteridophylla incertae sedis	Germany	Würzburg	Erlach bei Ochsenfurt	49.7062	10.0801	Locality		Saxo-Thuringian	Anglo-Saxonia	240	-4.607	21.534	Europe	Lettenkohlesandstein			upper Ladinian		Ladinian	30-40°N	787	1	tropical_summerwet		calculated	tropical_summerwet
2252	682	412	438	Bayerisches Landesamt für Umwelt, Munich			Taeniopteris	angustifolia								Taeniopteris	kelberi		Kustatscher et van Konijnenburg-van Cittert, 2010	Taeniopteridaceae	incertae sedis	Pteridophylla	Pteridophylla incertae sedis	Germany	Würzburg	Erlach bei Ochsenfurt	49.7062	10.0801	Locality		Saxo-Thuringian	Anglo-Saxonia	240	-4.607	21.534	Europe	Unterer Keuper			upper Ladinian		Ladinian	30-40°N	787	1	tropical_summerwet		calculated	tropical_summerwet
2253	682	412	432	Bayerisches Landesamt für Umwelt, Munich		cf.	Taeniopteris	angustifolia							cf.	Taeniopteris	kelberi		Kustatscher et van Konijnenburg-van Cittert, 2010	Taeniopteridaceae	incertae sedis	Pteridophylla	Pteridophylla incertae sedis	Germany	Würzburg	Erlach bei Ochsenfurt	49.7062	10.0801	Locality		Saxo-Thuringian	Anglo-Saxonia	240	-4.607	21.534	Europe	Lettenkohle			upper Ladinian		Ladinian	30-40°N	787	1	tropical_summerwet		calculated	tropical_summerwet
2268	260	59	455	Bercovici et al	2015		Gigantonoclea	guizhouensis								Abrotopteris	guizhouensis		(Gu et Zhi, 1974) Mo, 1980	incertae sedis	incertae sedis	Pteridophylla	Glossopteridales	China	Yangtze Platform		30.2724	112.288	Region	Yangtze River	South China	China	250	94.323	27.177	South China	Xuanwei Formation			Changhsingian		Changhsingian	30-40°N	12	0.652778	tropical_everwet	tropical_everwet	calculated	tropical_everwet
2269	260	58	456	Bercovici et al	2015		Annalepis		sp.							Lepacyclotes		sp.		Pleuromeiaceae	Pleuromeiales	Lycophyta	Pleuromeiales	China	Yangtze Platform		30.2724	112.288	Region	Yangtze River	South China	China	250	94.323	27.177	South China	Kayitou Formation			Induan		Induan	30-40°N	3	0.444444		tropical_summerwet	manual	tropical_summerwet
2270	260	59	455	Bercovici et al	2015		Annularia	pingloensis								Annularia	pingloensis		(Sze, 1940) Gu et Zhi, 1974	Calamitaceae	Equisetales	Sphenophyta	Equisetales	China	Yangtze Platform		30.2724	112.288	Region	Yangtze River	South China	China	250	94.323	27.177	South China	Xuanwei Formation			Changhsingian		Changhsingian	30-40°N	12	0.652778	tropical_everwet	tropical_everwet	calculated	tropical_everwet
2271	260	59	455	Bercovici et al	2015		Annularia	shirakii								Annularia	shirakii		Kawasaki, 1927	Calamitaceae	Equisetales	Sphenophyta	Equisetales	China	Yangtze Platform		30.2724	112.288	Region	Yangtze River	South China	China	250	94.323	27.177	South China	Xuanwei Formation			Changhsingian		Changhsingian	30-40°N	12	0.652778	tropical_everwet	tropical_everwet	calculated	tropical_everwet
2272	423	158	457	Bercovici et al	2015		Annularia		sp.							Annularia		sp.		Calamitaceae	Equisetales	Sphenophyta	Equisetales	China	Guizhou Province	Chahe	27.1688	105.379	Locality	Chahezhen	South China	China	250	90.428	21.37	South China	Xuanwei Formation			Changhsingian		Changhsingian	30-40°N	401	1	tropical_everwet		calculated	tropical_everwet
2273	423	158	457	Bercovici et al	2015		Compsopteris		sp.							Compsopteris		sp.		incertae sedis	Marattiales	Pteridophyta	Marattiales	China	Guizhou Province	Chahe	27.1688	105.379	Locality	Chahezhen	South China	China	250	90.428	21.37	South China	Xuanwei Formation			Changhsingian		Changhsingian	30-40°N	401	1	tropical_everwet		calculated	tropical_everwet
2274	1048	380	458	Bercovici et al	2015		Compsopteris		sp.							Compsopteris		sp.		incertae sedis	Marattiales	Pteridophyta	Marattiales	China	Guizhou Province	Jiucaichong	25.7987	104.687	Locality	Jiucaichong	South China	China	250	90.598	19.875	South China	Xuanwei Formation			Changhsingian		Changhsingian	20-30°N	172	1	tropical_everwet		calculated	tropical_everwet
2275	1050	382	459	Bercovici et al	2015		Compsopteris		sp.							Compsopteris		sp.		incertae sedis	Marattiales	Pteridophyta	Marattiales	China	Guizhou Province	Zhejue	28.511	103.038	Region		South China	China	250	87.78	21.474	South China	Xuanwei Formation			Changhsingian		Changhsingian	30-40°N	43	0.532946	tropical_everwet	tropical_everwet	calculated	tropical_everwet
2276	423	158	457	Bercovici et al	2015		Cordaites		sp.							Cordaites		sp.		incertae sedis	Cordaitales	Gymnospermae	Cordaitales	China	Guizhou Province	Chahe	27.1688	105.379	Locality	Chahezhen	South China	China	250	90.428	21.37	South China	Xuanwei Formation			Changhsingian		Changhsingian	30-40°N	401	1	tropical_everwet		calculated	tropical_everwet
2277	1048	380	458	Bercovici et al	2015		Cordaites		sp.							Cordaites		sp.		incertae sedis	Cordaitales	Gymnospermae	Cordaitales	China	Guizhou Province	Jiucaichong	25.7987	104.687	Locality	Jiucaichong	South China	China	250	90.598	19.875	South China	Xuanwei Formation			Changhsingian		Changhsingian	20-30°N	172	1	tropical_everwet		calculated	tropical_everwet
2278	1050	382	459	Bercovici et al	2015		Cordaites		sp.							Cordaites		sp.		incertae sedis	Cordaitales	Gymnospermae	Cordaitales	China	Guizhou Province	Zhejue	28.511	103.038	Region		South China	China	250	87.78	21.474	South China	Xuanwei Formation			Changhsingian		Changhsingian	30-40°N	43	0.532946	tropical_everwet	tropical_everwet	calculated	tropical_everwet
2279	423	158	457	Bercovici et al	2015		Fascipteris		sp.							Fascipteris		sp.		incertae sedis	Marattiales	Pteridophyta	Marattiales	China	Guizhou Province	Chahe	27.1688	105.379	Locality	Chahezhen	South China	China	250	90.428	21.37	South China	Xuanwei Formation			Changhsingian		Changhsingian	30-40°N	401	1	tropical_everwet		calculated	tropical_everwet
2280	1048	380	458	Bercovici et al	2015		Fascipteris		sp.							Fascipteris		sp.		incertae sedis	Marattiales	Pteridophyta	Marattiales	China	Guizhou Province	Jiucaichong	25.7987	104.687	Locality	Jiucaichong	South China	China	250	90.598	19.875	South China	Xuanwei Formation			Changhsingian		Changhsingian	20-30°N	172	1	tropical_everwet		calculated	tropical_everwet
2281	1050	382	459	Bercovici et al	2015		Fascipteris		sp.							Fascipteris		sp.		incertae sedis	Marattiales	Pteridophyta	Marattiales	China	Guizhou Province	Zhejue	28.511	103.038	Region		South China	China	250	87.78	21.474	South China	Xuanwei Formation			Changhsingian		Changhsingian	30-40°N	43	0.532946	tropical_everwet	tropical_everwet	calculated	tropical_everwet
2282	260	58	456	Bercovici et al	2015		Lepidopteris	martinsii	cf.							Germaropteris	martinsii	cf.	(Germar in Kurtze, 1839) Kustatscher et al., 2014	Peltaspermaceae	Peltaspermales	Pteridospermatophyta	Peltaspermales	China	Yangtze Platform		30.2724	112.288	Region	Yangtze River	South China	China	250	94.323	27.177	South China	Kayitou Formation			Induan		Induan	30-40°N	3	0.444444		tropical_summerwet	manual	tropical_summerwet
2283	260	59	455	Bercovici et al	2015		Gigantonoclea	hallei								Gigantonoclea	hallei		(Asama, 1959) Gu et Zhi, 1974	incertae sedis	Gigantopteridales	Gymnospermae	Gigantopteridales	China	Yangtze Platform		30.2724	112.288	Region	Yangtze River	South China	China	250	94.323	27.177	South China	Xuanwei Formation			Changhsingian		Changhsingian	30-40°N	12	0.652778	tropical_everwet	tropical_everwet	calculated	tropical_everwet
2284	260	59	455	Bercovici et al	2015		Gigantonoclea	nicotianaefolia								Gigantonoclea	nicotianaefolia		(Schenk) Gu et Zhi, 1974	incertae sedis	Gigantopteridales	Gymnospermae	Gigantopteridales	China	Yangtze Platform		30.2724	112.288	Region	Yangtze River	South China	China	250	94.323	27.177	South China	Xuanwei Formation			Changhsingian		Changhsingian	30-40°N	12	0.652778	tropical_everwet	tropical_everwet	calculated	tropical_everwet
2285	260	59	455	Bercovici et al	2015		Gigantonoclea	plumosa								Gigantonoclea	plumosa		Mo, 1980	incertae sedis	Gigantopteridales	Gymnospermae	Gigantopteridales	China	Yangtze Platform		30.2724	112.288	Region	Yangtze River	South China	China	250	94.323	27.177	South China	Xuanwei Formation			Changhsingian		Changhsingian	30-40°N	12	0.652778	tropical_everwet	tropical_everwet	calculated	tropical_everwet
2286	423	158	457	Bercovici et al	2015		Gigantonoclea		sp.							Gigantonoclea		sp.		incertae sedis	Gigantopteridales	Gymnospermae	Gigantopteridales	China	Guizhou Province	Chahe	27.1688	105.379	Locality	Chahezhen	South China	China	250	90.428	21.37	South China	Xuanwei Formation			Changhsingian		Changhsingian	30-40°N	401	1	tropical_everwet		calculated	tropical_everwet
2287	1048	380	458	Bercovici et al	2015		Gigantonoclea		sp.							Gigantonoclea		sp.		incertae sedis	Gigantopteridales	Gymnospermae	Gigantopteridales	China	Guizhou Province	Jiucaichong	25.7987	104.687	Locality	Jiucaichong	South China	China	250	90.598	19.875	South China	Xuanwei Formation			Changhsingian		Changhsingian	20-30°N	172	1	tropical_everwet		calculated	tropical_everwet
2288	1050	382	459	Bercovici et al	2015		Gigantonoclea		sp.							Gigantonoclea		sp.		incertae sedis	Gigantopteridales	Gymnospermae	Gigantopteridales	China	Guizhou Province	Zhejue	28.511	103.038	Region		South China	China	250	87.78	21.474	South China	Xuanwei Formation			Changhsingian		Changhsingian	30-40°N	43	0.532946	tropical_everwet	tropical_everwet	calculated	tropical_everwet
2289	260	59	455	Bercovici et al	2015		Gigantopteris	dictyophylloides								Gigantopteris	dictyophylloides		Gu et Zhi, 1974	incertae sedis	Gigantopteridales	Gymnospermae	Gigantopteridales	China	Yangtze Platform		30.2724	112.288	Region	Yangtze River	South China	China	250	94.323	27.177	South China	Xuanwei Formation			Changhsingian		Changhsingian	30-40°N	12	0.652778	tropical_everwet	tropical_everwet	calculated	tropical_everwet
2290	423	158	457	Bercovici et al	2015		Gigantopteris		sp.							Gigantopteris		sp.		incertae sedis	Gigantopteridales	Gymnospermae	Gigantopteridales	China	Guizhou Province	Chahe	27.1688	105.379	Locality	Chahezhen	South China	China	250	90.428	21.37	South China	Xuanwei Formation			Changhsingian		Changhsingian	30-40°N	401	1	tropical_everwet		calculated	tropical_everwet
2291	1048	380	458	Bercovici et al	2015		Gigantopteris		sp.							Gigantopteris		sp.		incertae sedis	Gigantopteridales	Gymnospermae	Gigantopteridales	China	Guizhou Province	Jiucaichong	25.7987	104.687	Locality	Jiucaichong	South China	China	250	90.598	19.875	South China	Xuanwei Formation			Changhsingian		Changhsingian	20-30°N	172	1	tropical_everwet		calculated	tropical_everwet
2292	1050	382	459	Bercovici et al	2015		Gigantopteris		sp.							Gigantopteris		sp.		incertae sedis	Gigantopteridales	Gymnospermae	Gigantopteridales	China	Guizhou Province	Zhejue	28.511	103.038	Region		South China	China	250	87.78	21.474	South China	Xuanwei Formation			Changhsingian		Changhsingian	30-40°N	43	0.532946	tropical_everwet	tropical_everwet	calculated	tropical_everwet
2293	423	158	457	Bercovici et al	2015		Ginkgoites		sp.							Ginkgoites		sp.		Ginkgoaceae	Ginkgoales	Ginkgophyta	Ginkgoales	China	Guizhou Province	Chahe	27.1688	105.379	Locality	Chahezhen	South China	China	250	90.428	21.37	South China	Xuanwei Formation			Changhsingian		Changhsingian	30-40°N	401	1	tropical_everwet		calculated	tropical_everwet
2294	423	158	457	Bercovici et al	2015		Lepidodendron		sp.							Lepidodendron		sp.		Lepidodendraceae	Lepidodendrales	Lycophyta	Lepidodendrales	China	Guizhou Province	Chahe	27.1688	105.379	Locality	Chahezhen	South China	China	250	90.428	21.37	South China	Xuanwei Formation			Changhsingian		Changhsingian	30-40°N	401	1	tropical_everwet		calculated	tropical_everwet
2295	423	159	460	Bercovici et al	2015		Lepidopteris		sp.							Lepidopteris		sp.		Peltaspermaceae	Peltaspermales	Pteridospermatophyta	Peltaspermales	China	Guizhou Province	Chahe	27.1688	105.379	Locality	Chahezhen	South China	China	250	90.428	21.37	South China	Kayitou Formation			Induan		Induan	30-40°N	27	0.425926	tropical_summerwet	tropical_summerwet	calculated	tropical_summerwet
2296	1048	381	461	Bercovici et al	2015		Lepidopteris		sp.							Lepidopteris		sp.		Peltaspermaceae	Peltaspermales	Pteridospermatophyta	Peltaspermales	China	Guizhou Province	Jiucaichong	25.7987	104.687	Locality	Jiucaichong	South China	China	250	90.598	19.875	South China	Kayitou Formation			Induan		Induan	20-30°N	41	0.357724	tropical_summerwet	tropical_summerwet	calculated	tropical_summerwet
2297	1727	159	462	Bercovici et al	2015		Lepidopteris		sp.							Lepidopteris		sp.		Peltaspermaceae	Peltaspermales	Pteridospermatophyta	Peltaspermales	China	Guizhou Province	Mide	27.1688	105.379	Locality	Chahezhen	South China	China	250	90.428	21.37	South China	Kayitou Formation			Induan		Induan	30-40°N	27	0.425926	tropical_summerwet	tropical_summerwet	calculated	tropical_summerwet
2298	260	59	455	Bercovici et al	2015		Lobatannularia	cathaysiana								Lobatannularia	cathaysiana		Yao, 1980	Calamitaceae	Equisetales	Sphenophyta	Equisetales	China	Yangtze Platform		30.2724	112.288	Region	Yangtze River	South China	China	250	94.323	27.177	South China	Xuanwei Formation			Changhsingian		Changhsingian	30-40°N	12	0.652778	tropical_everwet	tropical_everwet	calculated	tropical_everwet
2299	260	59	455	Bercovici et al	2015		Lobatannularia	heinanensis								Lobatannularia	heianensis		(Kodaira, 1924) Kawasaki, 1927	Calamitaceae	Equisetales	Sphenophyta	Equisetales	China	Yangtze Platform		30.2724	112.288	Region	Yangtze River	South China	China	250	94.323	27.177	South China	Xuanwei Formation			Changhsingian		Changhsingian	30-40°N	12	0.652778	tropical_everwet	tropical_everwet	calculated	tropical_everwet
2300	260	59	455	Bercovici et al	2015		Lobatannularia	multifolia								Lobatannularia	multifolia		Kon'no et Asama, 1950	Calamitaceae	Equisetales	Sphenophyta	Equisetales	China	Yangtze Platform		30.2724	112.288	Region	Yangtze River	South China	China	250	94.323	27.177	South China	Xuanwei Formation			Changhsingian		Changhsingian	30-40°N	12	0.652778	tropical_everwet	tropical_everwet	calculated	tropical_everwet
2301	423	158	457	Bercovici et al	2015		Lobatannularia		sp.							Lobatannularia		sp.		Calamitaceae	Equisetales	Sphenophyta	Equisetales	China	Guizhou Province	Chahe	27.1688	105.379	Locality	Chahezhen	South China	China	250	90.428	21.37	South China	Xuanwei Formation			Changhsingian		Changhsingian	30-40°N	401	1	tropical_everwet		calculated	tropical_everwet
2302	1048	380	458	Bercovici et al	2015		Lobatannularia		sp.							Lobatannularia		sp.		Calamitaceae	Equisetales	Sphenophyta	Equisetales	China	Guizhou Province	Jiucaichong	25.7987	104.687	Locality	Jiucaichong	South China	China	250	90.598	19.875	South China	Xuanwei Formation			Changhsingian		Changhsingian	20-30°N	172	1	tropical_everwet		calculated	tropical_everwet
2303	1050	382	459	Bercovici et al	2015		Lobatannularia		sp.							Lobatannularia		sp.		Calamitaceae	Equisetales	Sphenophyta	Equisetales	China	Guizhou Province	Zhejue	28.511	103.038	Region		South China	China	250	87.78	21.474	South China	Xuanwei Formation			Changhsingian		Changhsingian	30-40°N	43	0.532946	tropical_everwet	tropical_everwet	calculated	tropical_everwet
2304	423	158	457	Bercovici et al	2015		Neuropteris		sp.							Neuropteris		sp.		Osmundaceae	Osmundales	Pteridophyta	Osmundales	China	Guizhou Province	Chahe	27.1688	105.379	Locality	Chahezhen	South China	China	250	90.428	21.37	South China	Xuanwei Formation			Changhsingian		Changhsingian	30-40°N	401	1	tropical_everwet		calculated	tropical_everwet
2305	1048	380	458	Bercovici et al	2015		Neuropteris		sp.							Neuropteris		sp.		Osmundaceae	Osmundales	Pteridophyta	Osmundales	China	Guizhou Province	Jiucaichong	25.7987	104.687	Locality	Jiucaichong	South China	China	250	90.598	19.875	South China	Xuanwei Formation			Changhsingian		Changhsingian	20-30°N	172	1	tropical_everwet		calculated	tropical_everwet
2306	423	158	457	Bercovici et al	2015		Paracalamites		sp.							Paracalamites		sp.		Calamitaceae	Equisetales	Sphenophyta	Equisetales	China	Guizhou Province	Chahe	27.1688	105.379	Locality	Chahezhen	South China	China	250	90.428	21.37	South China	Xuanwei Formation			Changhsingian		Changhsingian	30-40°N	401	1	tropical_everwet		calculated	tropical_everwet
2307	1048	380	458	Bercovici et al	2015		Paracalamites		sp.							Paracalamites		sp.		Calamitaceae	Equisetales	Sphenophyta	Equisetales	China	Guizhou Province	Jiucaichong	25.7987	104.687	Locality	Jiucaichong	South China	China	250	90.598	19.875	South China	Xuanwei Formation			Changhsingian		Changhsingian	20-30°N	172	1	tropical_everwet		calculated	tropical_everwet
2308	260	59	455	Bercovici et al	2015		Paracalamites	stenocostatus								Paracalamites	stenocostatus		Gu et Zhi, 1974	Calamitaceae	Equisetales	Sphenophyta	Equisetales	China	Yangtze Platform		30.2724	112.288	Region	Yangtze River	South China	China	250	94.323	27.177	South China	Xuanwei Formation			Changhsingian		Changhsingian	30-40°N	12	0.652778	tropical_everwet	tropical_everwet	calculated	tropical_everwet
2309	423	158	457	Bercovici et al	2015		Pecopteris		sp.							Pecopteris		sp.		Osmundaceae	Osmundales	Pteridophyta	Osmundales	China	Guizhou Province	Chahe	27.1688	105.379	Locality	Chahezhen	South China	China	250	90.428	21.37	South China	Xuanwei Formation			Changhsingian		Changhsingian	30-40°N	401	1	tropical_everwet		calculated	tropical_everwet
2310	1048	380	458	Bercovici et al	2015		Pecopteris		sp.							Pecopteris		sp.		Osmundaceae	Osmundales	Pteridophyta	Osmundales	China	Guizhou Province	Jiucaichong	25.7987	104.687	Locality	Jiucaichong	South China	China	250	90.598	19.875	South China	Xuanwei Formation			Changhsingian		Changhsingian	20-30°N	172	1	tropical_everwet		calculated	tropical_everwet
2311	1050	382	459	Bercovici et al	2015		Pecopteris		sp.							Pecopteris		sp.		Osmundaceae	Osmundales	Pteridophyta	Osmundales	China	Guizhou Province	Zhejue	28.511	103.038	Region		South China	China	250	87.78	21.474	South China	Xuanwei Formation			Changhsingian		Changhsingian	30-40°N	43	0.532946	tropical_everwet	tropical_everwet	calculated	tropical_everwet
2312	423	159	460	Bercovici et al	2015		Peltaspermum		sp.							Peltaspermum		sp.		Peltaspermaceae	Peltaspermales	Pteridospermatophyta	Peltaspermales	China	Guizhou Province	Chahe	27.1688	105.379	Locality	Chahezhen	South China	China	250	90.428	21.37	South China	Kayitou Formation			Induan		Induan	30-40°N	27	0.425926	tropical_summerwet	tropical_summerwet	calculated	tropical_summerwet
2313	1048	381	461	Bercovici et al	2015		Peltaspermum		sp.							Peltaspermum		sp.		Peltaspermaceae	Peltaspermales	Pteridospermatophyta	Peltaspermales	China	Guizhou Province	Jiucaichong	25.7987	104.687	Locality	Jiucaichong	South China	China	250	90.598	19.875	South China	Kayitou Formation			Induan		Induan	20-30°N	41	0.357724	tropical_summerwet	tropical_summerwet	calculated	tropical_summerwet
2314	1727	159	462	Bercovici et al	2015		Peltaspermum		sp.							Peltaspermum		sp.		Peltaspermaceae	Peltaspermales	Pteridospermatophyta	Peltaspermales	China	Guizhou Province	Mide	27.1688	105.379	Locality	Chahezhen	South China	China	250	90.428	21.37	South China	Kayitou Formation			Induan		Induan	30-40°N	27	0.425926	tropical_summerwet	tropical_summerwet	calculated	tropical_summerwet
2315	260	58	456	Bercovici et al	2015		Peltaspermum		sp.							Peltaspermum		sp.		Peltaspermaceae	Peltaspermales	Pteridospermatophyta	Peltaspermales	China	Yangtze Platform		30.2724	112.288	Region	Yangtze River	South China	China	250	94.323	27.177	South China	Kayitou Formation			Induan		Induan	30-40°N	3	0.444444		tropical_summerwet	manual	tropical_summerwet
2316	423	158	457	Bercovici et al	2015		Radicites		sp.							Radicites		sp.		incertae sedis	incertae sedis	incertae sedis	incertae sedis incertae sedis	China	Guizhou Province	Chahe	27.1688	105.379	Locality	Chahezhen	South China	China	250	90.428	21.37	South China	Xuanwei Formation			Changhsingian		Changhsingian	30-40°N	401	1	tropical_everwet		calculated	tropical_everwet
2317	423	158	457	Bercovici et al	2015		Stigmaria		sp.							Stigmaria		sp.		incertae sedis	Lepidodendrales	Lycophyta	Lepidodendrales	China	Guizhou Province	Chahe	27.1688	105.379	Locality	Chahezhen	South China	China	250	90.428	21.37	South China	Xuanwei Formation			Changhsingian		Changhsingian	30-40°N	401	1	tropical_everwet		calculated	tropical_everwet
2318	1048	380	458	Bercovici et al	2015		Stigmaria		sp.							Stigmaria		sp.		incertae sedis	Lepidodendrales	Lycophyta	Lepidodendrales	China	Guizhou Province	Jiucaichong	25.7987	104.687	Locality	Jiucaichong	South China	China	250	90.598	19.875	South China	Xuanwei Formation			Changhsingian		Changhsingian	20-30°N	172	1	tropical_everwet		calculated	tropical_everwet
2319	1050	382	459	Bercovici et al	2015		Stigmaria		sp.							Stigmaria		sp.		incertae sedis	Lepidodendrales	Lycophyta	Lepidodendrales	China	Guizhou Province	Zhejue	28.511	103.038	Region		South China	China	250	87.78	21.474	South China	Xuanwei Formation			Changhsingian		Changhsingian	30-40°N	43	0.532946	tropical_everwet	tropical_everwet	calculated	tropical_everwet
2320	423	158	457	Bercovici et al	2015		Taeniopteris		sp.							Taeniopteris		sp.		Taeniopteridaceae	incertae sedis	Pteridophylla	Pteridophylla incertae sedis	China	Guizhou Province	Chahe	27.1688	105.379	Locality	Chahezhen	South China	China	250	90.428	21.37	South China	Xuanwei Formation			Changhsingian		Changhsingian	30-40°N	401	1	tropical_everwet		calculated	tropical_everwet
2321	1048	380	458	Bercovici et al	2015		Taeniopteris		sp.							Taeniopteris		sp.		Taeniopteridaceae	incertae sedis	Pteridophylla	Pteridophylla incertae sedis	China	Guizhou Province	Jiucaichong	25.7987	104.687	Locality	Jiucaichong	South China	China	250	90.598	19.875	South China	Xuanwei Formation			Changhsingian		Changhsingian	20-30°N	172	1	tropical_everwet		calculated	tropical_everwet
2322	1050	382	459	Bercovici et al	2015		Taeniopteris		sp.							Taeniopteris		sp.		Taeniopteridaceae	incertae sedis	Pteridophylla	Pteridophylla incertae sedis	China	Guizhou Province	Zhejue	28.511	103.038	Region		South China	China	250	87.78	21.474	South China	Xuanwei Formation			Changhsingian		Changhsingian	30-40°N	43	0.532946	tropical_everwet	tropical_everwet	calculated	tropical_everwet
2323	423	158	457	Bercovici et al	2015		Tingia		sp.							Tingia		sp.		incertae sedis	Noeggerathiales	Gymnospermae	Noeggerathiales	China	Guizhou Province	Chahe	27.1688	105.379	Locality	Chahezhen	South China	China	250	90.428	21.37	South China	Xuanwei Formation			Changhsingian		Changhsingian	30-40°N	401	1	tropical_everwet		calculated	tropical_everwet
2324	260	59	455	Bercovici et al	2015		Tingia		sp.							Tingia		sp.		incertae sedis	Noeggerathiales	Gymnospermae	Noeggerathiales	China	Yangtze Platform		30.2724	112.288	Region	Yangtze River	South China	China	250	94.323	27.177	South China	Xuanwei Formation			Changhsingian		Changhsingian	30-40°N	12	0.652778	tropical_everwet	tropical_everwet	calculated	tropical_everwet
2357	1566	524	478	Blanckenhorn	1888		Equisetites	mougeotii								Equisetites	mougeotii		(Brongniart, 1828) Wills, 1910	Equisetaceae	Equisetales	Sphenophyta	Equisetales	Germany	Eifel	Oberschneidhausen	50.7471	6.49056	City	Üdingen	South-West Avalonia	Anglo-Saxonia	240	-7.317	21.58	Europe	Hauptbuntsandstein, Oberer Buntsandstein			Lower Anisian		Anisian	30-40°N	58	1	tropical_summerwet	tropical_summerwet	calculated	tropical_summerwet
2358	1567	533	479	Blanckenhorn	1888		Equisetites	mougeotii								Equisetites	mougeotii		(Brongniart, 1828) Wills, 1910	Equisetaceae	Equisetales	Sphenophyta	Equisetales	Germany	Eifel	Steinbruch des Werner Langendorf, Mühlbach	50.6708	6.47789	Locality		South-West Avalonia	Anglo-Saxonia	240	-7.294	21.506	Europe	Hauptbuntsandstein, Oberer Buntsandstein			Lower Anisian		Anisian	30-40°N	58	1	tropical_summerwet		calculated	tropical_summerwet
2359	1569	528	480	Blanckenhorn	1888		Equisetites	mougeotii								Equisetites	mougeotii		(Brongniart, 1828) Wills, 1910	Equisetaceae	Equisetales	Sphenophyta	Equisetales	Germany	Eifel	Vlattener Chausée	50.6494	6.54695	Locality	Vlatten	South-West Avalonia	Anglo-Saxonia	240	-7.242	21.503	Europe	Hauptbuntsandstein, Oberer Buntsandstein			Lower Anisian		Anisian	30-40°N	58	1	tropical_summerwet		calculated	tropical_summerwet
2360	1570	528	481	Blanckenhorn	1888		Equisetites	mougeotii								Equisetites	mougeotii		(Brongniart, 1828) Wills, 1910	Equisetaceae	Equisetales	Sphenophyta	Equisetales	Germany	Eifel	Waad, SO von Vlatten	50.6494	6.54695	Locality	Vlatten	South-West Avalonia	Anglo-Saxonia	240	-7.242	21.503	Europe	Hauptbuntsandstein, Oberer Buntsandstein			Lower Anisian		Anisian	30-40°N	58	1	tropical_summerwet		calculated	tropical_summerwet
2361	1571	528	482	Blanckenhorn	1888		Equisetites	mougeotii								Equisetites	mougeotii		(Brongniart, 1828) Wills, 1910	Equisetaceae	Equisetales	Sphenophyta	Equisetales	Germany	Eifel	Weg nach Vlatten	50.6494	6.54695	Locality	Vlatten	South-West Avalonia	Anglo-Saxonia	240	-7.242	21.503	Europe	Hauptbuntsandstein, Oberer Buntsandstein			Lower Anisian		Anisian	30-40°N	58	1	tropical_summerwet		calculated	tropical_summerwet
2362	1564	532	483	Blanckenhorn	1888		Equisetites	mougeotii								Equisetites	mougeotii		(Brongniart, 1828) Wills, 1910	Equisetaceae	Equisetales	Sphenophyta	Equisetales	Germany	Eifel	Bürvenicher Schlucht	50.6559	6.59695	Locality	Bürvenich	South-West Avalonia	Anglo-Saxonia	240	-7.213	21.521	Europe	Linguladolomit, mittlerer Muschelkalk			Bythinian		Anisian	30-40°N	58	1	tropical_summerwet		calculated	tropical_summerwet
2363	1563	531	484	Blanckenhorn	1888		Equisetites	mougeotii								Equisetites	mougeotii		(Brongniart, 1828) Wills, 1910	Equisetaceae	Equisetales	Sphenophyta	Equisetales	Germany	Eifel	Berg	50.25	6.6667	Region		South-West Avalonia	Anglo-Saxonia	240	-7.002	21.163	Europe	Muschelsandstein, Unterer Muschelkalk			Pelsonian-Illyrian		Anisian	30-40°N	75	1	tropical_summerwet		calculated	tropical_summerwet
2364	1565	190	485	Blanckenhorn	1888		Equisetites	mougeotii								Equisetites	mougeotii		(Brongniart, 1828) Wills, 1910	Equisetaceae	Equisetales	Sphenophyta	Equisetales	Germany	Eifel	Flosdorf	50.6938	6.65499	City	Zülpich	South-West Avalonia	Anglo-Saxonia	240	-7.192	21.57	Europe	Muschelsandstein, Unterer Muschelkalk			Pelsonian-Illyrian		Anisian	30-40°N	58	1	tropical_summerwet		calculated	tropical_summerwet
2365	1568	534	486	Blanckenhorn	1888		Equisetites	mougeotii								Equisetites	mougeotii		(Brongniart, 1828) Wills, 1910	Equisetaceae	Equisetales	Sphenophyta	Equisetales	Germany	Eifel	Thuir	42.6325	2.75639	Locality		Montagne Noire	Western Europe - Alps	240	-6.777	13.088	Europe	Muschelsandstein, Unterer Muschelkalk			Pelsonian-Illyrian		Anisian	20-30°N	1	0.25		tropical_summerwet	manual	tropical_summerwet
2366	1564	532	483	Blanckenhorn	1888		Pinites	goeppertianus		Schleiden						Lebachia	goeppertiana			Utrechtiaceae	Voltziales	Coniferophyta	Voltziales	Germany	Eifel	Bürvenicher Schlucht	50.6559	6.59695	Locality	Bürvenich	South-West Avalonia	Anglo-Saxonia	240	-7.213	21.521	Europe	Linguladolomit, mittlerer Muschelkalk			Bythinian		Anisian	30-40°N	58	1	tropical_summerwet		calculated	tropical_summerwet
2367	1569	528	480	Blanckenhorn	1888	?	Lesangeana		sp.						?	Lesangeana		sp.		incertae sedis	incertae sedis	Lycophyta	Lycophyta incertae sedis	Germany	Eifel	Vlattener Chausée	50.6494	6.54695	Locality	Vlatten	South-West Avalonia	Anglo-Saxonia	240	-7.242	21.503	Europe	Hauptbuntsandstein, Oberer Buntsandstein			Lower Anisian		Anisian	30-40°N	58	1	tropical_summerwet		calculated	tropical_summerwet
2368	1567	533	479	Blanckenhorn	1888		Neuropteridium	bergense		Blanckenhorn, 1888						Neuropteridium	voltzii		(Brongniart, 1828) Schimper, 1879	Osmundaceae	Osmundales	Pteridophyta	Osmundales	Germany	Eifel	Steinbruch des Werner Langendorf, Mühlbach	50.6708	6.47789	Locality		South-West Avalonia	Anglo-Saxonia	240	-7.294	21.506	Europe	Hauptbuntsandstein, Oberer Buntsandstein			Lower Anisian		Anisian	30-40°N	58	1	tropical_summerwet		calculated	tropical_summerwet
2369	1567	533	479	Blanckenhorn	1888		Neuropteridium	voltzii								Neuropteridium	voltzii		(Brongniart, 1828) Schimper, 1879	Osmundaceae	Osmundales	Pteridophyta	Osmundales	Germany	Eifel	Steinbruch des Werner Langendorf, Mühlbach	50.6708	6.47789	Locality		South-West Avalonia	Anglo-Saxonia	240	-7.294	21.506	Europe	Hauptbuntsandstein, Oberer Buntsandstein			Lower Anisian		Anisian	30-40°N	58	1	tropical_summerwet		calculated	tropical_summerwet
2370	1567	533	479	Blanckenhorn	1888		Palissya		sp.							Palissya		sp.		Voltziaceae	Voltziales	Coniferophyta	Voltziales	Germany	Eifel	Steinbruch des Werner Langendorf, Mühlbach	50.6708	6.47789	Locality		South-West Avalonia	Anglo-Saxonia	240	-7.294	21.506	Europe	Hauptbuntsandstein, Oberer Buntsandstein			Lower Anisian		Anisian	30-40°N	58	1	tropical_summerwet		calculated	tropical_summerwet
2371	1569	528	480	Blanckenhorn	1888	?	Thamnopteris	vogesica		Schimper					?	Pelourdea	vogesiaca		(Schimper et Mougeot) Seward 1917	incertae sedis	incertae sedis	Coniferophyta	Coniferophyta incertae sedis	Germany	Eifel	Vlattener Chausée	50.6494	6.54695	Locality	Vlatten	South-West Avalonia	Anglo-Saxonia	240	-7.242	21.503	Europe	Hauptbuntsandstein, Oberer Buntsandstein			Lower Anisian		Anisian	30-40°N	58	1	tropical_summerwet		calculated	tropical_summerwet
2372	1566	524	478	Blanckenhorn	1888		Pinites	ramosus		Blanckenhorn, 1888						Pinites	ramosus		Blanckenhorn, 1888	Pinaceae	Coniferales	Coniferophyta	Coniferales	Germany	Eifel	Oberschneidhausen	50.7471	6.49056	City	Üdingen	South-West Avalonia	Anglo-Saxonia	240	-7.317	21.58	Europe	Hauptbuntsandstein, Oberer Buntsandstein			Lower Anisian		Anisian	30-40°N	58	1	tropical_summerwet	tropical_summerwet	calculated	tropical_summerwet
2373	1569	528	480	Blanckenhorn	1888		Pinites	ramosus		Blanckenhorn, 1888						Pinites	ramosus		Blanckenhorn, 1888	Pinaceae	Coniferales	Coniferophyta	Coniferales	Germany	Eifel	Vlattener Chausée	50.6494	6.54695	Locality	Vlatten	South-West Avalonia	Anglo-Saxonia	240	-7.242	21.503	Europe	Hauptbuntsandstein, Oberer Buntsandstein			Lower Anisian		Anisian	30-40°N	58	1	tropical_summerwet		calculated	tropical_summerwet
2374	1569	528	480	Blanckenhorn	1888		Sigillaria	oculina								Pleuromeia	oculina		(Blanckenhorn) Potonié, 1904	Pleuromeiaceae	Pleuromeiales	Lycophyta	Pleuromeiales	Germany	Eifel	Vlattener Chausée	50.6494	6.54695	Locality	Vlatten	South-West Avalonia	Anglo-Saxonia	240	-7.242	21.503	Europe	Hauptbuntsandstein, Oberer Buntsandstein			Lower Anisian		Anisian	30-40°N	58	1	tropical_summerwet		calculated	tropical_summerwet
2375	1567	533	479	Blanckenhorn	1888		Schizoneura	paradoxa								Schizoneura	paradoxa		(Schimper et Mougeot) Grauvogel-Stamm, 1978	Equisetaceae	Equisetales	Sphenophyta	Equisetales	Germany	Eifel	Steinbruch des Werner Langendorf, Mühlbach	50.6708	6.47789	Locality		South-West Avalonia	Anglo-Saxonia	240	-7.294	21.506	Europe	Hauptbuntsandstein, Oberer Buntsandstein			Lower Anisian		Anisian	30-40°N	58	1	tropical_summerwet		calculated	tropical_summerwet
2376	1567	533	479	Blanckenhorn	1888		Crematopteris	typica		Schimper et Mougeot, 1844						Scolopendrites	scolopendrioides		(Brongniart, 1828) van Konjinenburg-van Cittert et al., 2006	Osmundaceae	Osmundales	Pteridophyta	Osmundales	Germany	Eifel	Steinbruch des Werner Langendorf, Mühlbach	50.6708	6.47789	Locality		South-West Avalonia	Anglo-Saxonia	240	-7.294	21.506	Europe	Hauptbuntsandstein, Oberer Buntsandstein			Lower Anisian		Anisian	30-40°N	58	1	tropical_summerwet		calculated	tropical_summerwet
2377	1571	528	482	Blanckenhorn	1888		Taeniopteris	ambigua		Blanckenhorn, 1888						Taeniopteris	ambigua		Blanckenhorn, 1888	Taeniopteridaceae	incertae sedis	Pteridophylla	Pteridophylla incertae sedis	Germany	Eifel	Weg nach Vlatten	50.6494	6.54695	Locality	Vlatten	South-West Avalonia	Anglo-Saxonia	240	-7.242	21.503	Europe	Hauptbuntsandstein, Oberer Buntsandstein			Lower Anisian		Anisian	30-40°N	58	1	tropical_summerwet		calculated	tropical_summerwet
2378	1566	524	478	Blanckenhorn	1888		Voltzia	heterophylla								Voltzia	heterophylla		Brongniart, 1828	Voltziaceae	Voltziales	Coniferophyta	Voltziales	Germany	Eifel	Oberschneidhausen	50.7471	6.49056	City	Üdingen	South-West Avalonia	Anglo-Saxonia	240	-7.317	21.58	Europe	Hauptbuntsandstein, Oberer Buntsandstein			Lower Anisian		Anisian	30-40°N	58	1	tropical_summerwet	tropical_summerwet	calculated	tropical_summerwet
2379	1567	533	479	Blanckenhorn	1888		Voltzia	heterophylla								Voltzia	heterophylla		Brongniart, 1828	Voltziaceae	Voltziales	Coniferophyta	Voltziales	Germany	Eifel	Steinbruch des Werner Langendorf, Mühlbach	50.6708	6.47789	Locality		South-West Avalonia	Anglo-Saxonia	240	-7.294	21.506	Europe	Hauptbuntsandstein, Oberer Buntsandstein			Lower Anisian		Anisian	30-40°N	58	1	tropical_summerwet		calculated	tropical_summerwet
2380	1569	528	480	Blanckenhorn	1888		Voltzia	heterophylla		Brongniart						Voltzia	heterophylla		Brongniart, 1828	Voltziaceae	Voltziales	Coniferophyta	Voltziales	Germany	Eifel	Vlattener Chausée	50.6494	6.54695	Locality	Vlatten	South-West Avalonia	Anglo-Saxonia	240	-7.242	21.503	Europe	Hauptbuntsandstein, Oberer Buntsandstein			Lower Anisian		Anisian	30-40°N	58	1	tropical_summerwet		calculated	tropical_summerwet
2387	377	137	490	Boersma & Broekmeyer	1986		Annalepis		sp.				Ye, 1979, pl. 2, fig. 1, 1a			Lepacyclotes		sp.		Pleuromeiaceae	Pleuromeiales	Lycophyta	Pleuromeiales	China	Hubei		30.7378	112.238	Region	Hubei province	South China	China	240	91.142	31.332	South China				Ladinian		Ladinian	40-50°N	10	0.361667		tropical_summerwet	manual	tropical_summerwet
2388	377	137	490	Boersma & Broekmeyer	1986		Annalepis	zeilleri					Ye, 1979, fig. 1, pl. 1, fig. 1, 1a			Lepacyclotes	zeilleri		Fliche, 1910	Pleuromeiaceae	Pleuromeiales	Lycophyta	Pleuromeiales	China	Hubei		30.7378	112.238	Region	Hubei province	South China	China	240	91.142	31.332	South China				Ladinian		Ladinian	40-50°N	10	0.361667		tropical_summerwet	manual	tropical_summerwet
2423	971	356	507	Boersma & Broekmeyer	1986		Cladophlebis	densinervis		Vladimirovich, 1980			Vladimirovich, 1980, pl. 3, fig. 3-4			Cladophlebis	densinervis		Vladimirovich, 1980	Osmundaceae	Osmundales	Pteridophyta	Osmundales	USSR	Kemerovskaya	Kuzbass	54.7575	87.4055	Region	Oblast Kemerowo	Uimen-Lebed	Ob Plain	250	43.69	53.057	Ob Plain				Induan		Induan	60-70°N	18	0.234259		warm_temperate	manual	warm_temperate
2433	971	357	509	Boersma & Broekmeyer	1986		Cladophlebis	platyphylla		Vladimirovich, 1980			Vladimirovich, 1980, pl. 2, fig. 3			Cladophlebis	platyphylla		Vladimirovich, 1980	Osmundaceae	Osmundales	Pteridophyta	Osmundales	USSR	Kemerovskaya	Kuzbass	54.7575	87.4055	Region	Oblast Kemerowo	Uimen-Lebed	Ob Plain	250	43.69	53.057	Ob Plain				Olenekian		Olenekian	60-70°N	1	0.2		warm_temperate	manual	warm_temperate
2434	971	356	507	Boersma & Broekmeyer	1986		Cladophlebis	pusilla		Vladimirovich, 1980			Vladimirovich, 1980, pl. 2, fig. 4-6			Cladophlebis	pusilla		Vladimirovich, 1980	Osmundaceae	Osmundales	Pteridophyta	Osmundales	USSR	Kemerovskaya	Kuzbass	54.7575	87.4055	Region	Oblast Kemerowo	Uimen-Lebed	Ob Plain	250	43.69	53.057	Ob Plain				Induan		Induan	60-70°N	18	0.234259		warm_temperate	manual	warm_temperate
2444	971	356	507	Boersma & Broekmeyer	1986		Cladophlebis	tomiensis		Vladimirovich, 1980			Vladimirovich, 1980, pl. 3, fig. 1-2			Cladophlebis	tomiensis		Vladimirovich, 1980	Osmundaceae	Osmundales	Pteridophyta	Osmundales	USSR	Kemerovskaya	Kuzbass	54.7575	87.4055	Region	Oblast Kemerowo	Uimen-Lebed	Ob Plain	250	43.69	53.057	Ob Plain				Induan		Induan	60-70°N	18	0.234259		warm_temperate	manual	warm_temperate
2474	1012	562	520	Boersma & Broekmeyer	1986		Calamites	meriani		(Brongniart, 1828) Schenk, 1864			Quenstedt, 1878, pl. 89, fig. 14			Neocalamites	merianii		(Brongniart, 1828) Halle, 1908	Equisetaceae	Equisetales	Sphenophyta	Equisetales	Germany	Baden-Württemberg		48.6616	9.35013	Region	Region Baden-Württemberg	Moldanubian	Anglo-Saxonia	240	-4.621	20.386	Europe	Lettenkohle			late Ladinian		Ladinian	30-40°N	575	1	tropical_summerwet		calculated	tropical_summerwet
2485	4	3	522	Boersma & Broekmeyer	1986		Pleuromeia		sp.				Retallack, 1980			Pleuromeia		sp.		Pleuromeiaceae	Pleuromeiales	Lycophyta	Pleuromeiales	Australia	New South Wales		-31.2532	146.921	Region	New South Wales	Wagga-Omeo	Australia	250	97.01	-63.387	Australia				Olenekian-Lower Triassic		Olenekian	50-60°S	1	0.333333		warm_temperate	manual	warm_temperate
2544	387	292	546	Feng et al.	submitted		Pleuromeia	jiaochengensis								Pleuromeia	jiaochengensis		Wang et Wang, 1982	Pleuromeiaceae	Pleuromeiales	Lycophyta	Pleuromeiales	China	Shanxi Province		37.2861	111.893	Region	Shanxi Province	North China	Tarim-NChina	250	86.53	41.784	North China	Liujiagou Formation			upper Induan		Induan	50-60°N	10	0.366667	warm_temperate	warm_temperate	calculated	warm_temperate
2545	1919	609	547	Feng et al.	submitted		Pleuromeia		sp.							Pleuromeia		sp.		Pleuromeiaceae	Pleuromeiales	Lycophyta	Pleuromeiales	China	Hainan Province		19.5947	109.977	Region	Hainan island	South China	China	250	98.322	16.946	South China				Olenekian		Olenekian	20-30°N	100	1	tropical_summerwet		calculated	tropical_summerwet
2548	387	293	548	Feng et al.	submitted		Pleuromeia		sp.							Pleuromeia		sp.		Pleuromeiaceae	Pleuromeiales	Lycophyta	Pleuromeiales	China	Shanxi Province		37.2861	111.893	Region	Shanxi Province	North China	Tarim-NChina	250	86.53	41.784	North China	Heshanggou Formation			lower–middle Olenekian		Olenekian	50-60°N	5	0.3		warm_temperate	manual	warm_temperate
2549	1920	611	549	Feng et al.	submitted		Pleuromeia		sp.							Pleuromeia		sp.		Pleuromeiaceae	Pleuromeiales	Lycophyta	Pleuromeiales	China	Yunnan Province		24.4753	101.343	Region	Yunnan Province	South China	China	250	88.523	17.22	South China	Kayitou Formation			lower Induan		Induan	20-30°N	20	0.43	tropical_everwet	tropical_summerwet	manual	tropical_summerwet
2556	340	107	554	Borruel-Abadía et al	2014		Albertia	latifolia		Schimper et Mougeot 1844						Albertia	elliptica		Schimper, 1837	incertae sedis	incertae sedis	Coniferophyta	Coniferophyta incertae sedis	Spain	Iberian Range	Cedrillas	40.4367	-0.85453	Locality		West Asturian-Leonese	Iberia	240	-17.115	13.023	Europe	Eslida Formation			Anisian		Anisian	20-30°N	31	0.360215		tropical_summerwet	manual	tropical_summerwet
2557	341	108	555	Borruel-Abadía et al	2014		Albertia	latifolia		Schimper et Mougeot 1844						Albertia	elliptica		Schimper, 1837	incertae sedis	incertae sedis	Coniferophyta	Coniferophyta incertae sedis	Spain	Iberian Range	Gátova	39.7699	-0.52165	Locality		Cantabria	Iberia	240	-17.05	12.312	Europe	Eslida Formation			Anisian		Anisian	20-30°N	29	0.362069		tropical_summerwet	manual	tropical_summerwet
2558	340	107	554	Borruel-Abadía et al	2014		Equisetites	mougeotii								Equisetites	mougeotii		(Brongniart, 1828) Wills, 1910	Equisetaceae	Equisetales	Sphenophyta	Equisetales	Spain	Iberian Range	Cedrillas	40.4367	-0.85453	Locality		West Asturian-Leonese	Iberia	240	-17.115	13.023	Europe	Eslida Formation			Anisian		Anisian	20-30°N	31	0.360215		tropical_summerwet	manual	tropical_summerwet
2559	341	108	555	Borruel-Abadía et al	2014		Equisetites	mougeotii								Equisetites	mougeotii		(Brongniart, 1828) Wills, 1910	Equisetaceae	Equisetales	Sphenophyta	Equisetales	Spain	Iberian Range	Gátova	39.7699	-0.52165	Locality		Cantabria	Iberia	240	-17.05	12.312	Europe	Eslida Formation			Anisian		Anisian	20-30°N	29	0.362069		tropical_summerwet	manual	tropical_summerwet
2560	341	108	555	Borruel-Abadía et al	2014	?	Neocalamites		sp.						?	Neocalamites		sp.		Equisetaceae	Equisetales	Sphenophyta	Equisetales	Spain	Iberian Range	Gátova	39.7699	-0.52165	Locality		Cantabria	Iberia	240	-17.05	12.312	Europe	Eslida Formation			Anisian		Anisian	20-30°N	29	0.362069		tropical_summerwet	manual	tropical_summerwet
2561	340	107	554	Borruel-Abadía et al	2014		Pelourdea	vogesiaca								Pelourdea	vogesiaca		(Schimper et Mougeot) Seward 1917	incertae sedis	incertae sedis	Coniferophyta	Coniferophyta incertae sedis	Spain	Iberian Range	Cedrillas	40.4367	-0.85453	Locality		West Asturian-Leonese	Iberia	240	-17.115	13.023	Europe	Eslida Formation			Anisian		Anisian	20-30°N	31	0.360215		tropical_summerwet	manual	tropical_summerwet
2562	1905	603	556	Borruel-Abadía et al	2014		Peltaspermum		sp.							Peltaspermum		sp.		Peltaspermaceae	Peltaspermales	Pteridospermatophyta	Peltaspermales	Spain	Iberian Range	Montán	40.0354	-0.555	Locality		Cantabria	Iberia	240	-17.002	12.574	Europe	Eslida Formation			Anisian		Anisian	20-30°N	29	0.362069		tropical_summerwet	manual	tropical_summerwet
2563	340	107	554	Borruel-Abadía et al	2014		Pleuromeia		sp.							Pleuromeia		sp.		Pleuromeiaceae	Pleuromeiales	Lycophyta	Pleuromeiales	Spain	Iberian Range	Cedrillas	40.4367	-0.85453	Locality		West Asturian-Leonese	Iberia	240	-17.115	13.023	Europe	Eslida Formation			Anisian		Anisian	20-30°N	31	0.360215		tropical_summerwet	manual	tropical_summerwet
2564	1973	44	557	Borruel-Abadía et al	2014		Pleuromeia	sternbergii		(Münster) Corda ex Giebe 1853						Pleuromeia	sternbergii		(Münster, 1839) Corda ex Giebel, 1853	Pleuromeiaceae	Pleuromeiales	Lycophyta	Pleuromeiales	Spain	Iberian Range	Corbalán	40.4036	-0.98606	Locality	Corbalán	West Asturian-Leonese	Iberia	240	-17.223	13.019	Europe	Eslida Formation			Anisian		Anisian	20-30°N	31	0.360215		tropical_summerwet	manual	tropical_summerwet
2565	340	107	554	Borruel-Abadía et al	2014		Radicites		sp.							Radicites		sp.		incertae sedis	incertae sedis	incertae sedis	incertae sedis incertae sedis	Spain	Iberian Range	Cedrillas	40.4367	-0.85453	Locality		West Asturian-Leonese	Iberia	240	-17.115	13.023	Europe	Eslida Formation			Anisian		Anisian	20-30°N	31	0.360215		tropical_summerwet	manual	tropical_summerwet
2566	340	107	554	Borruel-Abadía et al	2014		Voltzia	heterophylla								Voltzia	heterophylla		Brongniart, 1828	Voltziaceae	Voltziales	Coniferophyta	Voltziales	Spain	Iberian Range	Cedrillas	40.4367	-0.85453	Locality		West Asturian-Leonese	Iberia	240	-17.115	13.023	Europe	Eslida Formation			Anisian		Anisian	20-30°N	31	0.360215		tropical_summerwet	manual	tropical_summerwet
2567	341	108	555	Borruel-Abadía et al	2014		Voltzia		sp.							Voltzia		sp.		Voltziaceae	Voltziales	Coniferophyta	Voltziales	Spain	Iberian Range	Gátova	39.7699	-0.52165	Locality		Cantabria	Iberia	240	-17.05	12.312	Europe	Eslida Formation			Anisian		Anisian	20-30°N	29	0.362069		tropical_summerwet	manual	tropical_summerwet
2568	340	107	554	Borruel-Abadía et al	2014		Voltzia	walchiaeformis		Fliche 1910						Voltzia	walchiaeformis		Fliche, 1910	Voltziaceae	Voltziales	Coniferophyta	Voltziales	Spain	Iberian Range	Cedrillas	40.4367	-0.85453	Locality		West Asturian-Leonese	Iberia	240	-17.115	13.023	Europe	Eslida Formation			Anisian		Anisian	20-30°N	31	0.360215		tropical_summerwet	manual	tropical_summerwet
2569	296	219	558	Borruel-Abadía et al	2014		Aethophyllum		sp.				Calzada 1987			Aethophyllum		sp.		incertae sedis	Voltziales	Coniferophyta	Voltziales	Spain	Catalan Coastal Range		41.6153	1.78778	Region	Catalan Coastal Range	Catalonia	Iberia	240	-14.82	13.633	Europe	Buntsandstein			Anisian		Anisian	20-30°N	22	1	tropical_summerwet		calculated	tropical_summerwet
2570	338	107	559	Borruel-Abadía et al	2014		Albertia	latifolia		Schimper and Mougeot 1844						Albertia	elliptica		Schimper, 1837	incertae sedis	incertae sedis	Coniferophyta	Coniferophyta incertae sedis	Spain	Castilian Branch of the Iberian Range	Cedrillas	40.4367	-0.85453	Locality		West Asturian-Leonese	Iberia	240	-17.115	13.023	Europe	Eslida Formation		N37a Aa2 Aa5	Anisian		Anisian	20-30°N	31	0.360215		tropical_summerwet	manual	tropical_summerwet
2571	339	108	560	Borruel-Abadía et al	2014		Albertia	latifolia		Schimper and Mougeot 1844						Albertia	elliptica		Schimper, 1837	incertae sedis	incertae sedis	Coniferophyta	Coniferophyta incertae sedis	Spain	Castilian Branch of the Iberian Range	Gátova	39.7699	-0.52165	Locality		Cantabria	Iberia	240	-17.05	12.312	Europe	Eslida Formation		Gat100-1b	Anisian		Anisian	20-30°N	29	0.362069		tropical_summerwet	manual	tropical_summerwet
2572	510	104	561	Borruel-Abadía et al	2014		Anomopteris	mougeotii					Díez 2000			Anomopteris	mougeotii		Brongniart, 1828	Osmundaceae	Osmundales	Pteridophyta	Osmundales	Spain	Pyrenees	Maya del Baztán Navarra	43.2032	-1.47842	Locality	Amaiur-Maya	South Pyrenees	Iberia	240	-16.781	15.809	Europe	Shale Unit			Anisian		Anisian	20-30°N	26	1	tropical_summerwet		calculated	tropical_summerwet
2573	509	219	562	Borruel-Abadía et al	2014		Pecopteris	sulziana					Almera 1909			Anomopteris	mougeotii		Brongniart, 1828	Osmundaceae	Osmundales	Pteridophyta	Osmundales	Spain	Catalonian Coastal Range		41.6153	1.78778	Region		Catalonia	Iberia	240	-14.82	13.633	Europe	Buntsandstein			Anisian		Anisian	20-30°N	22	1	tropical_summerwet		calculated	tropical_summerwet
2575	1106	103	564	Borruel-Abadía et al	2014	cf	Cycadocarpidium		sp.				Díez et al 1996		cf.	Cycadocarpidium		sp.		incertae sedis	Cycadales	Cycadophyta	Cycadales	Spain	Aragonian Branch of the Iberian Range (Rodanas section)		41.5976	-0.90566	Region	Aragonia	West Asturian-Leonese	Iberia	240	-17.269	14.376	Europe				Anisian		Anisian	20-30°N	41	0.402439	tropical_summerwet		calculated	tropical_summerwet
2576	1106	103	564	Borruel-Abadía et al	2014		Darneya		sp.				Díez et al 1996			Darneya		sp.		Voltziaceae	Voltziales	Coniferophyta	Voltziales	Spain	Aragonian Branch of the Iberian Range (Rodanas section)		41.5976	-0.90566	Region	Aragonia	West Asturian-Leonese	Iberia	240	-17.269	14.376	Europe				Anisian		Anisian	20-30°N	41	0.402439	tropical_summerwet		calculated	tropical_summerwet
2577	338	107	559	Borruel-Abadía et al	2014		Equisetites	mougeotii		Brongniart 1828–37						Equisetites	mougeotii		(Brongniart, 1828) Wills, 1910	Equisetaceae	Equisetales	Sphenophyta	Equisetales	Spain	Castilian Branch of the Iberian Range	Cedrillas	40.4367	-0.85453	Locality		West Asturian-Leonese	Iberia	240	-17.115	13.023	Europe	Eslida Formation		N37a N362 N38a N36 N38b	Anisian		Anisian	20-30°N	31	0.360215		tropical_summerwet	manual	tropical_summerwet
2578	339	108	560	Borruel-Abadía et al	2014	cf	Equisetites	mougeotii							cf.	Equisetites	mougeotii		(Brongniart, 1828) Wills, 1910	Equisetaceae	Equisetales	Sphenophyta	Equisetales	Spain	Castilian Branch of the Iberian Range	Gátova	39.7699	-0.52165	Locality		Cantabria	Iberia	240	-17.05	12.312	Europe	Eslida Formation		N0–10 N2–4 N3–5 N4–9 N0–1 N0–11 N0–16 N2–10 N3–2	Anisian		Anisian	20-30°N	29	0.362069		tropical_summerwet	manual	tropical_summerwet
2579	1348	462	565	Borruel-Abadía et al	2014		Equisetites		sp.				Díez et al 1996; Díez 2001			Equisetites		sp.		Equisetaceae	Equisetales	Sphenophyta	Equisetales	Spain	Aragonian Branch		41.5976	-0.90566	Region	Aragonia	Cantabria	Iberia	240	-16.825	14.15	Europe	Buntsandstein			Anisian		Anisian	20-30°N	39	0.405983	tropical_summerwet		calculated	tropical_summerwet
2580	1106	103	564	Borruel-Abadía et al	2014		Equisetites		sp.				Díez et al 1996			Equisetites		sp.		Equisetaceae	Equisetales	Sphenophyta	Equisetales	Spain	Aragonian Branch of the Iberian Range (Rodanas section)		41.5976	-0.90566	Region	Aragonia	West Asturian-Leonese	Iberia	240	-17.269	14.376	Europe				Anisian		Anisian	20-30°N	41	0.402439	tropical_summerwet		calculated	tropical_summerwet
2581	296	219	558	Borruel-Abadía et al	2014		Equisetites		sp.				Calzada 1987			Equisetites		sp.		Equisetaceae	Equisetales	Sphenophyta	Equisetales	Spain	Catalan Coastal Range		41.6153	1.78778	Region	Catalan Coastal Range	Catalonia	Iberia	240	-14.82	13.633	Europe	Buntsandstein			Anisian		Anisian	20-30°N	22	1	tropical_summerwet		calculated	tropical_summerwet
2582	1348	462	565	Borruel-Abadía et al	2014		Neocalamites		sp.				Díez et al 1996; Díez 2000			Neocalamites		sp.		Equisetaceae	Equisetales	Sphenophyta	Equisetales	Spain	Aragonian Branch		41.5976	-0.90566	Region	Aragonia	Cantabria	Iberia	240	-16.825	14.15	Europe	Buntsandstein			Anisian		Anisian	20-30°N	39	0.405983	tropical_summerwet		calculated	tropical_summerwet
2583	1776	569	566	Borruel-Abadía et al	2014		Neocalamites		sp.				Müller 1969; Díez 2000			Neocalamites		sp.		Equisetaceae	Equisetales	Sphenophyta	Equisetales	Spain	Pyrenees		42.6655	0.99296	Region		South Pyrenees	Iberia	240	-15.128	14.8	Europe	Buntsandstein			Anisian		Anisian	20-30°N	1	0.333333		tropical_summerwet	manual	tropical_summerwet
2584	1106	103	564	Borruel-Abadía et al	2014		Yuccites		sp.				Díez et al 1996			Pelourdea		sp.		incertae sedis	incertae sedis	Coniferophyta	Coniferophyta incertae sedis	Spain	Aragonian Branch of the Iberian Range (Rodanas section)		41.5976	-0.90566	Region	Aragonia	West Asturian-Leonese	Iberia	240	-17.269	14.376	Europe				Anisian		Anisian	20-30°N	41	0.402439	tropical_summerwet		calculated	tropical_summerwet
2585	296	219	567	Borruel-Abadía et al	2014		Pelourdea	vogesiaca					Calzada 1987			Pelourdea	vogesiaca		(Schimper et Mougeot) Seward 1917	incertae sedis	incertae sedis	Coniferophyta	Coniferophyta incertae sedis	Spain	Catalan Coastal Range		41.6153	1.78778	Region	Catalan Coastal Range	Catalonia	Iberia	240	-14.82	13.633	Europe	Buntsandstein			Anisian		Anisian	20-30°N	22	1	tropical_summerwet		calculated	tropical_summerwet
2586	338	107	559	Borruel-Abadía et al	2014		Pelourdea	vogesiaca		(Schimper et Mougeot) Seward 1917						Pelourdea	vogesiaca		(Schimper et Mougeot) Seward 1917	incertae sedis	incertae sedis	Coniferophyta	Coniferophyta incertae sedis	Spain	Castilian Branch of the Iberian Range	Cedrillas	40.4367	-0.85453	Locality		West Asturian-Leonese	Iberia	240	-17.115	13.023	Europe	Eslida Formation		N30d N36h	Anisian		Anisian	20-30°N	31	0.360215		tropical_summerwet	manual	tropical_summerwet
2587	1904	45	568	Borruel-Abadía et al	2014	cf.	Peltaspermum								cf.	Peltaspermum		sp.		Peltaspermaceae	Peltaspermales	Pteridospermatophyta	Peltaspermales	Spain	Iberian Range		41.7458	-1.78132	Region		West Asturian-Leonese	Iberia	240	-17.43	14.475	Europe	Buntsandstein			Anisian		Anisian	20-30°N				tropical_summerwet	manual	tropical_summerwet
2588	1903	603	569	Borruel-Abadía et al	2014	cf	Peltaspermum		sp.						cf.	Peltaspermum		sp.		Peltaspermaceae	Peltaspermales	Pteridospermatophyta	Peltaspermales	Spain	Castilian Branch of the Iberian Range	Montán	40.0354	-0.555	Locality		Cantabria	Iberia	240	-17.002	12.574	Europe	Eslida Formation		MoroF-3b	Anisian		Anisian	20-30°N				tropical_summerwet	manual	tropical_summerwet
2589	338	107	559	Borruel-Abadía et al	2014		Pleuromeia		sp.							Pleuromeia		sp.		Pleuromeiaceae	Pleuromeiales	Lycophyta	Pleuromeiales	Spain	Castilian Branch of the Iberian Range	Cedrillas	40.4367	-0.85453	Locality		West Asturian-Leonese	Iberia	240	-17.115	13.023	Europe	Eslida Formation		N36c N37a	Anisian		Anisian	20-30°N	31	0.360215		tropical_summerwet	manual	tropical_summerwet
2590	1972	643	570	Borruel-Abadía et al	2014		Pleuromeia	sternbergii		(Münster) Corda ex Giebe 1853			Schmidt (1937			Pleuromeia	sternbergii		(Münster, 1839) Corda ex Giebel, 1853	Pleuromeiaceae	Pleuromeiales	Lycophyta	Pleuromeiales	Spain	Castilian Branch		41.8357	-4.39764	Region	Kastilia	East Central Iberian	Iberia	240	-19.332	15.134	Europe	Buntsandstein			Anisian		Anisian	20-30°N	1	0.333333		tropical_summerwet	manual	tropical_summerwet
2591	235	44	571	Borruel-Abadía et al	2014		Pleuromeia	sternbergii		(Münster) Corda ex Giebe 1853						Pleuromeia	sternbergii		(Münster, 1839) Corda ex Giebel, 1853	Pleuromeiaceae	Pleuromeiales	Lycophyta	Pleuromeiales	Spain	Castilian Branch of the Iberian Range	Corbalán	40.4036	-0.98606	Locality	Corbalán	West Asturian-Leonese	Iberia	240	-17.223	13.019	Europe	Eslida Formation		ECOR220	Anisian		Anisian	20-30°N	31	0.360215		tropical_summerwet	manual	tropical_summerwet
2592	338	107	559	Borruel-Abadía et al	2014		Radicites		sp.							Radicites		sp.		incertae sedis	incertae sedis	incertae sedis	incertae sedis incertae sedis	Spain	Castilian Branch of the Iberian Range	Cedrillas	40.4367	-0.85453	Locality		West Asturian-Leonese	Iberia	240	-17.115	13.023	Europe	Eslida Formation			Anisian		Anisian	20-30°N	31	0.360215		tropical_summerwet	manual	tropical_summerwet
2593	339	108	560	Borruel-Abadía et al	2014		Radicites		sp.							Radicites		sp.		incertae sedis	incertae sedis	incertae sedis	incertae sedis incertae sedis	Spain	Castilian Branch of the Iberian Range	Gátova	39.7699	-0.52165	Locality		Cantabria	Iberia	240	-17.05	12.312	Europe	Eslida Formation			Anisian		Anisian	20-30°N	29	0.362069		tropical_summerwet	manual	tropical_summerwet
2594	338	107	559	Borruel-Abadía et al	2014		Voltzia	heterophylla		Brongniart 1828-37						Voltzia	heterophylla		Brongniart, 1828	Voltziaceae	Voltziales	Coniferophyta	Voltziales	Spain	Castilian Branch of the Iberian Range	Cedrillas	40.4367	-0.85453	Locality		West Asturian-Leonese	Iberia	240	-17.115	13.023	Europe	Eslida Formation		Ant 300 N362 N36g Aa19	Anisian		Anisian	20-30°N	31	0.360215		tropical_summerwet	manual	tropical_summerwet
2595	1106	103	564	Borruel-Abadía et al	2014		Voltzia		sp.				Díez JB Grauvogel-Stamm L Broutin J Ferrer J Gisbert J Linan E 1996 Première découverte d'eune paléoflore anisiennedans le faciès “Buntsandstein” de la branche aragonaise de la Cordillère Ibérique (Esp. agne) C R Acad Sci Paris 323 (2) 341–347			Voltzia		sp.		Voltziaceae	Voltziales	Coniferophyta	Voltziales	Spain	Aragonian Branch of the Iberian Range (Rodanas section)		41.5976	-0.90566	Region	Aragonia	West Asturian-Leonese	Iberia	240	-17.269	14.376	Europe				Anisian		Anisian	20-30°N	41	0.402439	tropical_summerwet		calculated	tropical_summerwet
2596	339	108	560	Borruel-Abadía et al	2014	cf.	Voltzia								cf.	Voltzia		sp.		Voltziaceae	Voltziales	Coniferophyta	Voltziales	Spain	Castilian Branch of the Iberian Range	Gátova	39.7699	-0.52165	Locality		Cantabria	Iberia	240	-17.05	12.312	Europe	Eslida Formation		N0–6	Anisian		Anisian	20-30°N	29	0.362069		tropical_summerwet	manual	tropical_summerwet
2597	338	107	559	Borruel-Abadía et al	2014		Voltzia	walchiaeformis	cf.	Fliche 1910						Voltzia	walchiaeformis	cf.	Fliche, 1910	Voltziaceae	Voltziales	Coniferophyta	Voltziales	Spain	Castilian Branch of the Iberian Range	Cedrillas	40.4367	-0.85453	Locality		West Asturian-Leonese	Iberia	240	-17.115	13.023	Europe	Eslida Formation		N30c	Anisian		Anisian	20-30°N	31	0.360215		tropical_summerwet	manual	tropical_summerwet
2598	1106	103	564	Borruel-Abadía et al	2014		Willsiostrobus		sp.				Díez et al 1996			Willsiostrobus		sp.		Voltziaceae	Voltziales	Coniferophyta	Voltziales	Spain	Aragonian Branch of the Iberian Range (Rodanas section)		41.5976	-0.90566	Region	Aragonia	West Asturian-Leonese	Iberia	240	-17.269	14.376	Europe				Anisian		Anisian	20-30°N	41	0.402439	tropical_summerwet		calculated	tropical_summerwet
2687	2365	743	597	Brack & Kustatscher	2013		Voltzia	recubariensis								Voltzia	recubariensis		(De Zigno) Schenk, 1868	Voltziaceae	Voltziales	Coniferophyta	Voltziales	Italy		Bagolino	45.823	10.4628	Locality		Southern Alps	Apulia	240	-10.065	11.954	Europe	Angolo Limestone			uppermost Pelsonian		Anisian	20-30°N	28	1	tropical_summerwet		calculated	tropical_summerwet
2704	558	394	604	Brea et al.	2008		Araucarioxylon	protoaraucana		Brea, 1997						Araucarioxylon	protoaraucana		Brea, 1997	Araucariaceae	Coniferales	Coniferophyta	Coniferales	Argentina	Cuyo Basin	Agua de Zorra area, locality B	-34.2389	-68.5577	Area	Cuyo basin, Schlucht	Cuyana	Pampia	240	-74.012	-42.398	South America	Paramillo Formation		FL V	Cortaderitian, Ladinian	Yabeiella mareyesiaca-Scytophyllum bonettiae - Protocircoporoxylon cortaderitaensis Ziozone (MBC)	Ladinian	30-40°N	22	0.504762	warm_temperate	warm_temperate	calculated	warm_temperate
2705	560	394	605	Brea et al.	2008		Araucarioxylon	protoaraucana		Brea, 1997						Araucarioxylon	protoaraucana		Brea, 1997	Araucariaceae	Coniferales	Coniferophyta	Coniferales	Argentina	Cuyo Basin	Agua de Zorra area, locality D	-34.2389	-68.5577	Area	Cuyo basin, Schlucht	Cuyana	Pampia	240	-74.012	-42.398	South America	Paramillo Formation		FL VI	Cortaderitian, Ladinian	Yabeiella mareyesiaca-Scytophyllum bonettiae - Protocircoporoxylon cortaderitaensis Ziozone (MBC)	Ladinian	30-40°N	22	0.504762	warm_temperate	warm_temperate	calculated	warm_temperate
2706	561	394	606	Brea et al.	2008		Araucarioxylon	protoaraucana		Brea, 1997						Araucarioxylon	protoaraucana		Brea, 1997	Araucariaceae	Coniferales	Coniferophyta	Coniferales	Argentina	Cuyo Basin	Darwin Forest, Agua de Zorra area	-32.591	-69.3471	City	Uspallata	Cuyana	Pampia	240	-74.012	-42.398	South America	Paramillo Formation		FL IV	Cortaderitian, Ladinian	Yabeiella mareyesiaca-Scytophyllum bonettiae - Protocircoporoxylon cortaderitaensis Ziozone (MBC)	Ladinian	30-40°N	22	0.504762	warm_temperate	warm_temperate	calculated	warm_temperate
2708	559	394	608	Brea et al.	2008		Araucarioxylon	protoaraucana		Brea, 1997	Fig. 8E, 9A-C					Araucarioxylon	protoaraucana		Brea, 1997	Araucariaceae	Coniferales	Coniferophyta	Coniferales	Argentina	Cuyo Basin	Agua de Zorra area, locality C	-34.2389	-68.5577	Area	Cuyo basin, Schlucht	Cuyana	Pampia	240	-74.012	-42.398	South America	Paramillo Formation		FL V	Cortaderitian, Ladinian	Yabeiella mareyesiaca-Scytophyllum bonettiae - Protocircoporoxylon cortaderitaensis Ziozone (MBC)	Ladinian	30-40°N	22	0.504762	warm_temperate	warm_temperate	calculated	warm_temperate
2709	561	394	606	Brea et al.	2008		Cladophlebis	kurtzi		Frenguelli, 1947			Brea, 2000			Cladophlebis	kurtzii		Frenguelli, 1947	Osmundaceae	Osmundales	Pteridophyta	Osmundales	Argentina	Cuyo Basin	Darwin Forest, Agua de Zorra area	-32.591	-69.3471	City	Uspallata	Cuyana	Pampia	240	-74.012	-42.398	South America	Paramillo Formation		FL I	Cortaderitian, Ladinian	Yabeiella mareyesiaca-Scytophyllum bonettiae - Protocircoporoxylon cortaderitaensis Ziozone (MBC)	Ladinian	30-40°N	22	0.504762	warm_temperate	warm_temperate	calculated	warm_temperate
2710	561	394	606	Brea et al.	2008		Cladophlebis	mendozaensis		(Geinitz) Frenguelli, 1947			Brea, 2000			Cladophlebis	mendozaensis		(Geinitz, 1876) Frenguelli, 1947	Osmundaceae	Osmundales	Pteridophyta	Osmundales	Argentina	Cuyo Basin	Darwin Forest, Agua de Zorra area	-32.591	-69.3471	City	Uspallata	Cuyana	Pampia	240	-74.012	-42.398	South America	Paramillo Formation		FL I	Cortaderitian, Ladinian	Yabeiella mareyesiaca-Scytophyllum bonettiae - Protocircoporoxylon cortaderitaensis Ziozone (MBC)	Ladinian	30-40°N	22	0.504762	warm_temperate	warm_temperate	calculated	warm_temperate
2711	561	394	606	Brea et al.	2008		Cladophlebis	mesozoica		Frenguelli, 1947			Brea, 2000			Cladophlebis	mesozoica		Kurtz ex Frenguelli, 1947	Osmundaceae	Osmundales	Pteridophyta	Osmundales	Argentina	Cuyo Basin	Darwin Forest, Agua de Zorra area	-32.591	-69.3471	City	Uspallata	Cuyana	Pampia	240	-74.012	-42.398	South America	Paramillo Formation		FL I	Cortaderitian, Ladinian	Yabeiella mareyesiaca-Scytophyllum bonettiae - Protocircoporoxylon cortaderitaensis Ziozone (MBC)	Ladinian	30-40°N	22	0.504762	warm_temperate	warm_temperate	calculated	warm_temperate
2712	561	394	606	Brea et al.	2008		Cladophlebis		sp.							Cladophlebis		sp.		Osmundaceae	Osmundales	Pteridophyta	Osmundales	Argentina	Cuyo Basin	Darwin Forest, Agua de Zorra area	-32.591	-69.3471	City	Uspallata	Cuyana	Pampia	240	-74.012	-42.398	South America	Paramillo Formation		FL II	Cortaderitian, Ladinian	Yabeiella mareyesiaca-Scytophyllum bonettiae - Protocircoporoxylon cortaderitaensis Ziozone (MBC)	Ladinian	30-40°N	22	0.504762	warm_temperate	warm_temperate	calculated	warm_temperate
2713	558	394	604	Brea et al.	2008		Cuneoxylon	spallettii		Artabe et Brea, 2003						Cuneumxylon	spallettii		Artabe et Brea, 2003	Corystospermaceae	Corystospermales	Pteridospermatophyta	Corystospermales	Argentina	Cuyo Basin	Agua de Zorra area, locality B	-34.2389	-68.5577	Area	Cuyo basin, Schlucht	Cuyana	Pampia	240	-74.012	-42.398	South America	Paramillo Formation		FL V	Cortaderitian, Ladinian	Yabeiella mareyesiaca-Scytophyllum bonettiae - Protocircoporoxylon cortaderitaensis Ziozone (MBC)	Ladinian	30-40°N	22	0.504762	warm_temperate	warm_temperate	calculated	warm_temperate
2714	559	394	608	Brea et al.	2008		Cuneoxylon	spallettii		Artabe et Brea, 2003						Cuneumxylon	spallettii		Artabe et Brea, 2003	Corystospermaceae	Corystospermales	Pteridospermatophyta	Corystospermales	Argentina	Cuyo Basin	Agua de Zorra area, locality C	-34.2389	-68.5577	Area	Cuyo basin, Schlucht	Cuyana	Pampia	240	-74.012	-42.398	South America	Paramillo Formation		FL V	Cortaderitian, Ladinian	Yabeiella mareyesiaca-Scytophyllum bonettiae - Protocircoporoxylon cortaderitaensis Ziozone (MBC)	Ladinian	30-40°N	22	0.504762	warm_temperate	warm_temperate	calculated	warm_temperate
2715	560	394	605	Brea et al.	2008		Cuneoxylon	spallettii		Artabe et Brea, 2003						Cuneumxylon	spallettii		Artabe et Brea, 2003	Corystospermaceae	Corystospermales	Pteridospermatophyta	Corystospermales	Argentina	Cuyo Basin	Agua de Zorra area, locality D	-34.2389	-68.5577	Area	Cuyo basin, Schlucht	Cuyana	Pampia	240	-74.012	-42.398	South America	Paramillo Formation		FL VI	Cortaderitian, Ladinian	Yabeiella mareyesiaca-Scytophyllum bonettiae - Protocircoporoxylon cortaderitaensis Ziozone (MBC)	Ladinian	30-40°N	22	0.504762	warm_temperate	warm_temperate	calculated	warm_temperate
2716	561	394	606	Brea et al.	2008		Cuneoxylon	spallettii		Artabe et Brea, 2003						Cuneumxylon	spallettii		Artabe et Brea, 2003	Corystospermaceae	Corystospermales	Pteridospermatophyta	Corystospermales	Argentina	Cuyo Basin	Darwin Forest, Agua de Zorra area	-32.591	-69.3471	City	Uspallata	Cuyana	Pampia	240	-74.012	-42.398	South America	Paramillo Formation		FL IV	Cortaderitian, Ladinian	Yabeiella mareyesiaca-Scytophyllum bonettiae - Protocircoporoxylon cortaderitaensis Ziozone (MBC)	Ladinian	30-40°N	22	0.504762	warm_temperate	warm_temperate	calculated	warm_temperate
2727	191	35	613	Broglio Loriga et al.	2002		Albertia				Tab. 1					Albertia		sp.		incertae sedis	incertae sedis	Coniferophyta	Coniferophyta incertae sedis	Italy	Bozen/Bolzano	Kühwiesenkopf/Prà della Vacca	46.7217	12.0704	Locality	Kühwiesenkopf/Prà della Vacca	Carnic Alps - South Karawanken	Western Europe - Alps	240	-3.762	13.427	Europe	Dont Formation			middle Pelsonian		Anisian	20-30°N	231	1	tropical_summerwet		calculated	tropical_summerwet
2728	191	35	613	Broglio Loriga et al.	2002		Anomopteris		sp.		Pl. 1, Fig. 5					Anomopteris		sp.		Osmundaceae	Osmundales	Pteridophyta	Osmundales	Italy	Bozen/Bolzano	Kühwiesenkopf/Prà della Vacca	46.7217	12.0704	Locality	Kühwiesenkopf/Prà della Vacca	Carnic Alps - South Karawanken	Western Europe - Alps	240	-3.762	13.427	Europe	Dont Formation			middle Pelsonian		Anisian	20-30°N	231	1	tropical_summerwet		calculated	tropical_summerwet
2729	191	35	613	Broglio Loriga et al.	2002		Bjuvia	dolomitica		Wachtler et Van Konijnenburg - van Cittert	Tab. 1; Pl. 1, Fig. 6					Bjuvia	dolomitica		Wachtler et van Konijnenburg-van Cittert, 2000	incertae sedis	Cycadales	Cycadophyta	Cycadales	Italy	Bozen/Bolzano	Kühwiesenkopf/Prà della Vacca	46.7217	12.0704	Locality	Kühwiesenkopf/Prà della Vacca	Carnic Alps - South Karawanken	Western Europe - Alps	240	-3.762	13.427	Europe	Dont Formation			middle Pelsonian		Anisian	20-30°N	231	1	tropical_summerwet		calculated	tropical_summerwet
2730	191	35	613	Broglio Loriga et al.	2002		Cladophlebis		sp.							Cladophlebis		sp.		Osmundaceae	Osmundales	Pteridophyta	Osmundales	Italy	Bozen/Bolzano	Kühwiesenkopf/Prà della Vacca	46.7217	12.0704	Locality	Kühwiesenkopf/Prà della Vacca	Carnic Alps - South Karawanken	Western Europe - Alps	240	-3.762	13.427	Europe	Dont Formation			middle Pelsonian		Anisian	20-30°N	231	1	tropical_summerwet		calculated	tropical_summerwet
2731	191	35	613	Broglio Loriga et al.	2002		Crematopteris		sp.		Pl. 1, Fig. 3					Scolopendrites		sp.		Osmundaceae	Osmundales	Pteridophyta	Osmundales	Italy	Bozen/Bolzano	Kühwiesenkopf/Prà della Vacca	46.7217	12.0704	Locality	Kühwiesenkopf/Prà della Vacca	Carnic Alps - South Karawanken	Western Europe - Alps	240	-3.762	13.427	Europe	Dont Formation			middle Pelsonian		Anisian	20-30°N	231	1	tropical_summerwet		calculated	tropical_summerwet
2732	191	35	613	Broglio Loriga et al.	2002		Dioonitocarpidium		sp.		Tab. 1; Pl. 1, Fig. 7					Dioonitocarpidium		sp.		incertae sedis	Cycadales	Cycadophyta	Cycadales	Italy	Bozen/Bolzano	Kühwiesenkopf/Prà della Vacca	46.7217	12.0704	Locality	Kühwiesenkopf/Prà della Vacca	Carnic Alps - South Karawanken	Western Europe - Alps	240	-3.762	13.427	Europe	Dont Formation			middle Pelsonian		Anisian	20-30°N	231	1	tropical_summerwet		calculated	tropical_summerwet
2733	191	35	613	Broglio Loriga et al.	2002		Equisetites		sp.							Equisetites		sp.		Equisetaceae	Equisetales	Sphenophyta	Equisetales	Italy	Bozen/Bolzano	Kühwiesenkopf/Prà della Vacca	46.7217	12.0704	Locality	Kühwiesenkopf/Prà della Vacca	Carnic Alps - South Karawanken	Western Europe - Alps	240	-3.762	13.427	Europe	Dont Formation			middle Pelsonian		Anisian	20-30°N	231	1	tropical_summerwet		calculated	tropical_summerwet
2734	191	35	613	Broglio Loriga et al.	2002	?	Isoetites		sp.		Tab.1; Pl. 1, Fig. 2				?	Isoetites		sp.		Isoetaceae	Isoetales	Lycophyta	Isoetales	Italy	Bozen/Bolzano	Kühwiesenkopf/Prà della Vacca	46.7217	12.0704	Locality	Kühwiesenkopf/Prà della Vacca	Carnic Alps - South Karawanken	Western Europe - Alps	240	-3.762	13.427	Europe	Dont Formation			middle Pelsonian		Anisian	20-30°N	231	1	tropical_summerwet		calculated	tropical_summerwet
2735	191	35	613	Broglio Loriga et al.	2002		Neuropteridium		sp.		Pl. 1, Fig. 4					Neuropteridium		sp.		Osmundaceae	Osmundales	Pteridophyta	Osmundales	Italy	Bozen/Bolzano	Kühwiesenkopf/Prà della Vacca	46.7217	12.0704	Locality	Kühwiesenkopf/Prà della Vacca	Carnic Alps - South Karawanken	Western Europe - Alps	240	-3.762	13.427	Europe	Dont Formation			middle Pelsonian		Anisian	20-30°N	231	1	tropical_summerwet		calculated	tropical_summerwet
2736	191	35	613	Broglio Loriga et al.	2002		Peltaspermum		sp.							Peltaspermum		sp.		Peltaspermaceae	Peltaspermales	Pteridospermatophyta	Peltaspermales	Italy	Bozen/Bolzano	Kühwiesenkopf/Prà della Vacca	46.7217	12.0704	Locality	Kühwiesenkopf/Prà della Vacca	Carnic Alps - South Karawanken	Western Europe - Alps	240	-3.762	13.427	Europe	Dont Formation			middle Pelsonian		Anisian	20-30°N	231	1	tropical_summerwet		calculated	tropical_summerwet
2737	191	35	613	Broglio Loriga et al.	2002		Pseudovoltzia		sp.		Pl. 1, fig. 1					Pseudovoltzia		sp.		Majonicaceae	Voltziales	Coniferophyta	Voltziales	Italy	Bozen/Bolzano	Kühwiesenkopf/Prà della Vacca	46.7217	12.0704	Locality	Kühwiesenkopf/Prà della Vacca	Carnic Alps - South Karawanken	Western Europe - Alps	240	-3.762	13.427	Europe	Dont Formation		KÜH0058	middle Pelsonian		Anisian	20-30°N	231	1	tropical_summerwet		calculated	tropical_summerwet
2738	191	35	613	Broglio Loriga et al.	2002		Pterophyllum		sp.		Tab.1					Pterophyllum		sp.		incertae sedis	Bennettitales?	Cycadophyta	Bennettitales	Italy	Bozen/Bolzano	Kühwiesenkopf/Prà della Vacca	46.7217	12.0704	Locality	Kühwiesenkopf/Prà della Vacca	Carnic Alps - South Karawanken	Western Europe - Alps	240	-3.762	13.427	Europe	Dont Formation			middle Pelsonian		Anisian	20-30°N	231	1	tropical_summerwet		calculated	tropical_summerwet
2739	191	35	613	Broglio Loriga et al.	2002	?	Sagenopteris		sp.		Tab. 1				?	Sagenopteris		sp.		Caytoniaceae	Caytoniales	Pteridospermatophyta	Caytoniales	Italy	Bozen/Bolzano	Kühwiesenkopf/Prà della Vacca	46.7217	12.0704	Locality	Kühwiesenkopf/Prà della Vacca	Carnic Alps - South Karawanken	Western Europe - Alps	240	-3.762	13.427	Europe	Dont Formation			middle Pelsonian		Anisian	20-30°N	231	1	tropical_summerwet		calculated	tropical_summerwet
2740	191	35	613	Broglio Loriga et al.	2002		Scytophyllum		sp.							Scytophyllum		sp.		Peltaspermaceae	Peltaspermales	Pteridospermatophyta	Peltaspermales	Italy	Bozen/Bolzano	Kühwiesenkopf/Prà della Vacca	46.7217	12.0704	Locality	Kühwiesenkopf/Prà della Vacca	Carnic Alps - South Karawanken	Western Europe - Alps	240	-3.762	13.427	Europe	Dont Formation			middle Pelsonian		Anisian	20-30°N	231	1	tropical_summerwet		calculated	tropical_summerwet
2741	191	35	613	Broglio Loriga et al.	2002		Taeniopteris		sp.		Tab. 1					Taeniopteris		sp.		Taeniopteridaceae	incertae sedis	Pteridophylla	Pteridophylla incertae sedis	Italy	Bozen/Bolzano	Kühwiesenkopf/Prà della Vacca	46.7217	12.0704	Locality	Kühwiesenkopf/Prà della Vacca	Carnic Alps - South Karawanken	Western Europe - Alps	240	-3.762	13.427	Europe	Dont Formation			middle Pelsonian		Anisian	20-30°N	231	1	tropical_summerwet		calculated	tropical_summerwet
2742	191	35	613	Broglio Loriga et al.	2002		Voltzia	recubariensis		Schenk	Tab. 1					Voltzia	recubariensis		(De Zigno) Schenk, 1868	Voltziaceae	Voltziales	Coniferophyta	Voltziales	Italy	Bozen/Bolzano	Kühwiesenkopf/Prà della Vacca	46.7217	12.0704	Locality	Kühwiesenkopf/Prà della Vacca	Carnic Alps - South Karawanken	Western Europe - Alps	240	-3.762	13.427	Europe	Dont Formation			middle Pelsonian		Anisian	20-30°N	231	1	tropical_summerwet		calculated	tropical_summerwet
2743	191	35	613	Broglio Loriga et al.	2002	?	Voltzia		sp.		Tab. 1; Pl. 1, Fig. 1				?	Voltzia		sp.		Voltziaceae	Voltziales	Coniferophyta	Voltziales	Italy	Bozen/Bolzano	Kühwiesenkopf/Prà della Vacca	46.7217	12.0704	Locality	Kühwiesenkopf/Prà della Vacca	Carnic Alps - South Karawanken	Western Europe - Alps	240	-3.762	13.427	Europe	Dont Formation			middle Pelsonian		Anisian	20-30°N	231	1	tropical_summerwet		calculated	tropical_summerwet
2744	191	35	613	Broglio Loriga et al.	2002		Voltzia	walchiaeformis		Fliche						Voltzia	walchiaeformis		Fliche, 1910	Voltziaceae	Voltziales	Coniferophyta	Voltziales	Italy	Bozen/Bolzano	Kühwiesenkopf/Prà della Vacca	46.7217	12.0704	Locality	Kühwiesenkopf/Prà della Vacca	Carnic Alps - South Karawanken	Western Europe - Alps	240	-3.762	13.427	Europe	Dont Formation			middle Pelsonian		Anisian	20-30°N	231	1	tropical_summerwet		calculated	tropical_summerwet
2746	445	174	614	Brongniart	1828		Anomopteris	mougeotii		Brongniart, 1828						Anomopteris	mougeotii		Brongniart, 1828	Osmundaceae	Osmundales	Pteridophyta	Osmundales	France		Carrière de Mètendal	48.3465	6.63537	Locality	Rambervillers	Saxo-Thuringian	Anglo-Saxonia	240	-6.252	19.395	Europe	Grés bigaree, Buntsandstein			lower Anisian		Anisian	20-30°N	333	1	tropical_summerwet		calculated	tropical_summerwet
2747	446	173	615	Brongniart	1828		Anomopteris	mougeotii		Brongniart, 1828						Anomopteris	mougeotii		Brongniart, 1828	Osmundaceae	Osmundales	Pteridophyta	Osmundales	France		Granviller near Bruyères	48.2388	6.67345	Locality		Moldanubian	Anglo-Saxonia	240	-6.184	19.305	Europe	Grés bigaree, Buntsandstein			lower Anisian		Anisian	20-30°N	325	1	tropical_summerwet		calculated	tropical_summerwet
2748	447	174	616	Brongniart	1828		Anomopteris	mougeotii		Brongniart, 1828						Anomopteris	mougeotii		Brongniart, 1828	Osmundaceae	Osmundales	Pteridophyta	Osmundales	France		Rambersvillers	48.3465	6.63537	Locality		Saxo-Thuringian	Anglo-Saxonia	240	-6.252	19.395	Europe	Grés bigaree, Buntsandstein			lower Anisian		Anisian	20-30°N	333	1	tropical_summerwet		calculated	tropical_summerwet
2749	448	83	617	Brongniart	1828		Anomopteris	mougeotii		Brongniart, 1828						Anomopteris	mougeotii		Brongniart, 1828	Osmundaceae	Osmundales	Pteridophyta	Osmundales	France		Soultz-les-Bain	48.5682	7.47788	Locality	Soultz-les-Bains	Saxo-Thuringian	Anglo-Saxonia	240	-5.793	19.813	Europe	Grés bigaree, Buntsandstein			lower Anisian		Anisian	20-30°N	432	1	tropical_summerwet		calculated	tropical_summerwet
2750	452	447	618	Brongniart	1828		Anomopteris	mougeotii		Brongniart, 1828						Anomopteris	mougeotii		Brongniart, 1828	Osmundaceae	Osmundales	Pteridophyta	Osmundales	France		Vosges	48.8568	7.31599	Region	Nationalpark Vosges du Nord	Saxo-Thuringian	Anglo-Saxonia	240	-6.016	20.038	Europe	Grés bigaree, Buntsandstein			lower Anisian		Anisian	30-40°N	426	1	tropical_summerwet		calculated	tropical_summerwet
2751	454	513	619	Brongniart	1828		Anomopteris	mougeotii		Brongniart, 1828						Anomopteris	mougeotii		Brongniart, 1828	Osmundaceae	Osmundales	Pteridophyta	Osmundales	France		Wasselonne	48.6377	7.44455	Locality	Wasselone	Saxo-Thuringian	Anglo-Saxonia	240	-5.843	19.869	Europe	Grés bigaree, Buntsandstein			lower Anisian		Anisian	20-30°N	432	1	tropical_summerwet		calculated	tropical_summerwet
2752	448	83	617	Brongniart	1828		Pecopteris	sulziana		Brongniart, 1828						Anomopteris	mougeotii		Brongniart, 1828	Osmundaceae	Osmundales	Pteridophyta	Osmundales	France		Soultz-les-Bain	48.5682	7.47788	Locality	Soultz-les-Bains	Saxo-Thuringian	Anglo-Saxonia	240	-5.793	19.813	Europe	Grés bigaree, Buntsandstein			lower Anisian		Anisian	20-30°N	432	1	tropical_summerwet		calculated	tropical_summerwet
2754	454	513	619	Brongniart	1828		Calamites	remotus		Brongniart, 1828						Calamites	remotus		Brongniart, 1828	Calamitaceae	Equisetales	Sphenophyta	Equisetales	France		Wasselonne	48.6377	7.44455	Locality	Wasselone	Saxo-Thuringian	Anglo-Saxonia	240	-5.843	19.869	Europe	Grés bigaree, Buntsandstein			lower Anisian		Anisian	20-30°N	432	1	tropical_summerwet		calculated	tropical_summerwet
2758	1357	467	622	Brongniart	1828		Calamites	arenaceus		Jaeger						Equisetites	arenaceus		(Jaeger, 1827) Schenk, 1864	Equisetaceae	Equisetales	Sphenophyta	Equisetales	France		Marmontier	48.6907	7.38205	Locality		Saxo-Thuringian	Anglo-Saxonia	240	-5.905	19.902	Europe	Grés bigaree, Buntsandstein			lower Anisian		Anisian	20-30°N	434	1	tropical_summerwet		calculated	tropical_summerwet
2759	454	512	623	Brongniart	1828		Calamites	arenaceus		Jaeger						Equisetites	arenaceus		(Jaeger, 1827) Schenk, 1864	Equisetaceae	Equisetales	Sphenophyta	Equisetales	France		Wasselonne	48.6377	7.44455	Locality	Wasselone	Saxo-Thuringian	Anglo-Saxonia	240	-5.843	19.869	Europe	Lettenkeuper			upper Ladinian		Ladinian	20-30°N	77	1	tropical_summerwet		calculated	tropical_summerwet
2761	1357	467	622	Brongniart	1828		Calamites	mougeotii		Brongniart, 1828						Equisetites	mougeotii		(Brongniart, 1828) Wills, 1910	Equisetaceae	Equisetales	Sphenophyta	Equisetales	France		Marmontier	48.6907	7.38205	Locality		Saxo-Thuringian	Anglo-Saxonia	240	-5.905	19.902	Europe	Grés bigaree, Buntsandstein			lower Anisian		Anisian	20-30°N	434	1	tropical_summerwet		calculated	tropical_summerwet
2764	448	83	617	Brongniart	1828		Sphenopteris	palmetta		Brongniart, 1828						Neuropteridium	voltzii		(Brongniart, 1828) Schimper, 1879	Osmundaceae	Osmundales	Pteridophyta	Osmundales	France		Soultz-les-Bain	48.5682	7.47788	Locality	Soultz-les-Bains	Saxo-Thuringian	Anglo-Saxonia	240	-5.793	19.813	Europe	Grés bigaree, Buntsandstein			lower Anisian		Anisian	20-30°N	432	1	tropical_summerwet		calculated	tropical_summerwet
2765	1138	409	624	Brongniart	1828		Pecopteris	macrophylla		Brongniart, 1828						Pecopteris	macrophylla		Brongniart, 1828	Osmundaceae	Osmundales	Pteridophyta	Osmundales	Germany		Heilbronn	49.1427	9.21088	Locality		Saxo-Thuringian	Anglo-Saxonia	240	-4.916	20.79	Europe	Lettenkeuper			upper Ladinian		Ladinian	30-40°N	700	1	tropical_summerwet		calculated	tropical_summerwet
2767	448	83	617	Brongniart	1828		Filicites	scolopendroides		Brongniart, 1828						Scolopendrites	grauvogelii		Van Konijnenburg-van Cittert et al., 2006	Osmundaceae	Osmundales	Pteridophyta	Osmundales	France		Soultz-les-Bain	48.5682	7.47788	Locality	Soultz-les-Bains	Saxo-Thuringian	Anglo-Saxonia	240	-5.793	19.813	Europe	Grés bigaree, Buntsandstein			lower Anisian		Anisian	20-30°N	432	1	tropical_summerwet		calculated	tropical_summerwet
2769	448	83	617	Brongniart	1828		Sphenopteris	elegans		Brongniart, 1828						Sphenopteris	elegans		Brongniart, 1828	Sphenopteridaceae	incertae sedis	Pteridophylla	Pteridophylla incertae sedis	France		Soultz-les-Bain	48.5682	7.47788	Locality	Soultz-les-Bains	Saxo-Thuringian	Anglo-Saxonia	240	-5.793	19.813	Europe	Grés bigaree, Buntsandstein			lower Anisian		Anisian	20-30°N	432	1	tropical_summerwet		calculated	tropical_summerwet
2771	448	83	617	Brongniart	1828		Sphenopteris	myriophyllum		Brongniart, 1828						Sphenopteris	myriophyllum		Brongniart, 1828	Sphenopteridaceae	incertae sedis	Pteridophylla	Pteridophylla incertae sedis	France		Soultz-les-Bain	48.5682	7.47788	Locality	Soultz-les-Bains	Saxo-Thuringian	Anglo-Saxonia	240	-5.793	19.813	Europe	Grés bigaree, Buntsandstein			lower Anisian		Anisian	20-30°N	432	1	tropical_summerwet		calculated	tropical_summerwet
2773	884	685	626	Brongniart	1828		Pecopteris	schoenleiniana		Brongniart, 1828						Sphenopteris	schoenleiniana		(Brongniart, 1836) Presl, 1838	Sphenopteridaceae	incertae sedis	Pteridophylla	Pteridophylla incertae sedis	Germany		Würzburg	49.7913	9.95336	City	Würzburg	Saxo-Thuringian	Anglo-Saxonia	240	-4.725	21.578	Europe	Lettenkeuper			upper Ladinian		Ladinian	30-40°N	802	1	tropical_summerwet		calculated	tropical_summerwet
2774	448	83	617	Brongniart	1828		Sphenopteris	voltzii		Brongniart, 1828						Sphenopteris	voltzii		Brongniart, 1828	Sphenopteridaceae	incertae sedis	Pteridophylla	Pteridophylla incertae sedis	France		Soultz-les-Bain	48.5682	7.47788	Locality	Soultz-les-Bains	Saxo-Thuringian	Anglo-Saxonia	240	-5.793	19.813	Europe	Grés bigaree, Buntsandstein			lower Anisian		Anisian	20-30°N	432	1	tropical_summerwet		calculated	tropical_summerwet
2775	2227	625	627	Brongniart	1828		Neuropteris	gaillardoti		Brongniart, 1828						Todites	gaillardotii		(Brongniart, 1828) Kustatscher et van Konijnenburg-van Cittert, 2011	Osmundaceae	Osmundales	Pteridophyta	Osmundales	Germany		Lunéville	48.5922	6.49234	Locality		Saxo-Thuringian	Anglo-Saxonia	240	-6.443	19.586	Europe	Muschelkalk			lower Ladinian		Ladinian	20-30°N	7	0.309524		tropical_summerwet	manual	tropical_summerwet
2790	300	83	629	Bronn	1851-1852		Aethophyllum	stipulare		Brongniart, 1828	pl. 12, fig. 6					Aethophyllum	stipulare		Brongniart, 1828	incertae sedis	Voltziales	Coniferophyta	Voltziales	France	Alsace	Soultz-les-Bains	48.5682	7.47788	Locality	Soultz-les-Bains	Saxo-Thuringian	Anglo-Saxonia	240	-5.793	19.813	Europe	Buntsandstein			Anisian		Anisian	20-30°N	432	1	tropical_summerwet		calculated	tropical_summerwet
2791	300	83	629	Bronn	1851-1852		Albertia	elliptica		Schimper, 1838	pl. 13, fig. 6a-d					Albertia	elliptica		Schimper, 1837	incertae sedis	incertae sedis	Coniferophyta	Coniferophyta incertae sedis	France	Alsace	Soultz-les-Bains	48.5682	7.47788	Locality	Soultz-les-Bains	Saxo-Thuringian	Anglo-Saxonia	240	-5.793	19.813	Europe	Buntsandstein			Anisian		Anisian	20-30°N	432	1	tropical_summerwet		calculated	tropical_summerwet
2792	300	83	629	Bronn	1851-1852		Anomopteris	mougeoti								Anomopteris	mougeotii		Brongniart, 1828	Osmundaceae	Osmundales	Pteridophyta	Osmundales	France	Alsace	Soultz-les-Bains	48.5682	7.47788	Locality	Soultz-les-Bains	Saxo-Thuringian	Anglo-Saxonia	240	-5.793	19.813	Europe	Buntsandstein			Anisian		Anisian	20-30°N	432	1	tropical_summerwet		calculated	tropical_summerwet
2793	459	513	630	Bronn	1851-1852		Anomopteris	mougeoti								Anomopteris	mougeotii		Brongniart, 1828	Osmundaceae	Osmundales	Pteridophyta	Osmundales	France	Alsace	Wasselonne	48.6377	7.44455	Locality	Wasselone	Saxo-Thuringian	Anglo-Saxonia	240	-5.843	19.869	Europe	Buntsandstein			Anisian		Anisian	20-30°N	432	1	tropical_summerwet		calculated	tropical_summerwet
2794	485	200	631	Bronn	1851-1852		Anomopteris	mougeoti								Anomopteris	mougeotii		Brongniart, 1828	Osmundaceae	Osmundales	Pteridophyta	Osmundales	Germany		Schwarzwald	48.2795	8.18423	Locality		Moldanubian	Anglo-Saxonia	240	-5.215	19.729	Europe	Buntsandstein			Anisian		Anisian	20-30°N	386	1	tropical_summerwet		calculated	tropical_summerwet
2808	1082	389	643	Bronn	1851-1852		Cottaia	mougeoti		Schimper et Mougeot, 1844						Cottaea	mougeoti		Schimper et Mougeot, 1844	incertae sedis	incertae sedis	Pteridophyta	Pteridophyta incertae sedis	France	Alsace	Cirey	48.5812	6.94535	Locality	Cirey-sur-Vezouze	Saxo-Thuringian	Anglo-Saxonia	240	-6.144	19.689	Europe	Buntsandstein			Anisian		Anisian	20-30°N	364	1	tropical_summerwet		calculated	tropical_summerwet
2809	457	179	644	Bronn	1851-1852		Cottaia	mougeoti		Schimper et Mougeot, 1844						Cottaea	mougeoti		Schimper et Mougeot, 1844	incertae sedis	incertae sedis	Pteridophyta	Pteridophyta incertae sedis	France	Alsace	Heiligenberg	48.538	7.39189	Locality		Saxo-Thuringian	Anglo-Saxonia	240	-5.836	19.763	Europe	Buntsandstein			Anisian		Anisian	20-30°N	425	1	tropical_summerwet		calculated	tropical_summerwet
2810	918	31	645	Bronn	1851-1852		Taeniopteris	marantacea		Presl						Danaeopsis	marantaceae		(Presl in Sternberg, 1838) Schimper, 1869	Marattiaceae	Marattiales	Pteridophyta	Marattiales	Germany		Sulz	48.3537	8.63442	Locality	Sulz am Neckar	Moldanubian	Anglo-Saxonia	240	-4.953	19.915	Europe	Lettenkohle			Ladinian		Ladinian	20-30°N	348	1	tropical_summerwet		calculated	tropical_summerwet
2815	1132	407	650	Bronn	1851-1852		Taeniopteris	marantacea		Presl						Danaeopsis	marantaceae		(Presl in Sternberg, 1838) Schimper, 1869	Marattiaceae	Marattiales	Pteridophyta	Marattiales	Germany		Gotha	50.9469	10.7093	Locality		Mid-German Crystalline High	Anglo-Saxonia	240	-4.769	22.83	Europe	unterer Mergel der Lettenkohlegruppe			Ladinian		Ladinian	30-40°N	1047	1	tropical_summerwet		calculated	tropical_summerwet
2819	1294	677	653	Bronn	1851-1852		Echinostachys	oblonga								Echinostachys	oblonga		Brongniart, 1828	Equisetaceae	Equisetales	Sphenophyta	Equisetales	England		Bromsgrove	52.3356	-2.0619	Locality		North Avalonia	Anglo-Saxonia	240	-13.265	21.231	Europe	Buntsandstein			Anisian		Anisian	30-40°N	35	1	tropical_summerwet		calculated	tropical_summerwet
2820	300	83	629	Bronn	1851-1852		Echinostachys	oblonga								Echinostachys	oblonga		Brongniart, 1828	Equisetaceae	Equisetales	Sphenophyta	Equisetales	France	Alsace	Soultz-les-Bains	48.5682	7.47788	Locality	Soultz-les-Bains	Saxo-Thuringian	Anglo-Saxonia	240	-5.793	19.813	Europe	Buntsandstein			Anisian		Anisian	20-30°N	432	1	tropical_summerwet		calculated	tropical_summerwet
2822	1303	446	654	Bronn	1851-1852		Endolepis	elegans		Schleid	pl. 12, fig. 6					Endolepis	elegans		Schleid	incertae sedis	incertae sedis	Coniferophyta	Coniferophyta incertae sedis	Germany		Jena	50.927	11.5892	Locality		Saxo-Thuringian	Anglo-Saxonia	240	-4.214	23.046	Europe	Muschelkalk	k2		lower Ladinian		Ladinian	30-40°N	579	1	tropical_summerwet		calculated	tropical_summerwet
2823	1358	467	655	Bronn	1851-1852		Calamites	arenaceus								Equisetites	arenaceus		(Jaeger, 1827) Schenk, 1864	Equisetaceae	Equisetales	Sphenophyta	Equisetales	France		Marmoutier	48.6907	7.38205	Locality	Marmoutier; France	Saxo-Thuringian	Anglo-Saxonia	240	-5.905	19.902	Europe	Buntsandstein			Anisian		Anisian	20-30°N	434	1	tropical_summerwet		calculated	tropical_summerwet
2824	453	513	656	Bronn	1851-1852		Calamites	arenaceus								Equisetites	arenaceus		(Jaeger, 1827) Schenk, 1864	Equisetaceae	Equisetales	Sphenophyta	Equisetales	France		Wasselheim (Unter-Elsass)	48.6377	7.44455	Locality	Wasselonne	Saxo-Thuringian	Anglo-Saxonia	240	-5.843	19.869	Europe	Buntsandstein			Anisian		Anisian	20-30°N	432	1	tropical_summerwet		calculated	tropical_summerwet
2825	1360	83	657	Bronn	1851-1852		Calamites	arenaceus								Equisetites	arenaceus		(Jaeger, 1827) Schenk, 1864	Equisetaceae	Equisetales	Sphenophyta	Equisetales	France	Niederrhein	Sulzbad	48.5682	7.47788	Locality	Soultz-les-Bains	Saxo-Thuringian	Anglo-Saxonia	240	-5.793	19.813	Europe	Buntsandstein			Anisian		Anisian	20-30°N	432	1	tropical_summerwet		calculated	tropical_summerwet
2827	32	14	659	Bronn	1851-1852		Calamites	arenaceus								Equisetites	arenaceus		(Jaeger, 1827) Schenk, 1864	Equisetaceae	Equisetales	Sphenophyta	Equisetales	Germany		Coburg	50.2612	10.9627	Locality		Saxo-Thuringian	Anglo-Saxonia	240	-4.299	22.274	Europe	Lettenkohle			Ladinian		Ladinian	30-40°N	921	1	tropical_summerwet		calculated	tropical_summerwet
2830	1490	737	662	Bronn	1851-1852		Calamites	arenaceus								Equisetites	arenaceus		(Jaeger, 1827) Schenk, 1864	Equisetaceae	Equisetales	Sphenophyta	Equisetales	Germany	Rheinbaiern	Donnersberg	49.6239	7.94908	Area	Donnersbergkreis	Mid-German Crystalline High	Anglo-Saxonia	240	-5.927	20.905	Europe	Buntsandstein			Anisian		Anisian	30-40°N	145	1	tropical_summerwet		calculated	tropical_summerwet
2831	1493	202	663	Bronn	1851-1852		Calamites	arenaceus								Equisetites	arenaceus		(Jaeger, 1827) Schenk, 1864	Equisetaceae	Equisetales	Sphenophyta	Equisetales	Germany	Schwarzwald	Villingen	48.0594	8.46409	Locality	Villingen-Schwenningen	Moldanubian	Anglo-Saxonia	240	-4.941	19.599	Europe	Buntsandstein			Anisian		Anisian	20-30°N	228	1	tropical_summerwet		calculated	tropical_summerwet
2832	1492	504	664	Bronn	1851-1852		Calamites	arenaceus								Equisetites	arenaceus		(Jaeger, 1827) Schenk, 1864	Equisetaceae	Equisetales	Sphenophyta	Equisetales	Germany	Schwarzwald	Rottweil	48.1516	8.63471	Locality	Rottweil	Moldanubian	Anglo-Saxonia	240	-4.868	19.729	Europe	Lettenkohle			Ladinian		Ladinian	20-30°N	244	1	tropical_summerwet		calculated	tropical_summerwet
2840	1492	504	671	Bronn	1851-1852		Equisetites	bronnii		v. Sternberg						Equisetites	bronnii		v. Sternberg	Equisetaceae	Equisetales	Sphenophyta	Equisetales	Germany	Schwarzwald	Rottweil	48.1516	8.63471	Locality	Rottweil	Moldanubian	Anglo-Saxonia	240	-4.868	19.729	Europe	Lettenkeuper			Ladinian		Ladinian	20-30°N	244	1	tropical_summerwet		calculated	tropical_summerwet
2858	300	83	629	Bronn	1851-1852		Füchselia	schimperi		Endlinger, 1847						Fuechselia	schimperi		Endlinger, 1847	incertae sedis	incertae sedis	Coniferophyta	Coniferophyta incertae sedis	France	Alsace	Soultz-les-Bains	48.5682	7.47788	Locality	Soultz-les-Bains	Saxo-Thuringian	Anglo-Saxonia	240	-5.793	19.813	Europe	Buntsandstein			Anisian		Anisian	20-30°N	432	1	tropical_summerwet		calculated	tropical_summerwet
2859	1720	563	688	Bronn	1851-1852		Caulopteris	tessellata		Schimper et Mougeot, 1844						Lepidodendrites	tessellata		(Schimper et Mougeot) Fliche, 1910	incertae sedis	incertae sedis	Lycophyta	Lepidodendrales	France		Epinal near Strassburg	48.1726	6.45079	Locality		Moldanubian	Anglo-Saxonia	240	-6.302	19.188	Europe	Buntsandstein			Anisian		Anisian	20-30°N	324	1	tropical_summerwet		calculated	tropical_summerwet
2860	300	83	629	Bronn	1851-1852		Palaeoxyris	regularis			pl. 12, fig. 5					Palaeoxyris	regularis		Brongniart, 1828	incertae sedis	incertae sedis	Pteridophyta	Pteridophyta incertae sedis	France	Alsace	Soultz-les-Bains	48.5682	7.47788	Locality	Soultz-les-Bains	Saxo-Thuringian	Anglo-Saxonia	240	-5.793	19.813	Europe	Buntsandstein			Anisian		Anisian	20-30°N	432	1	tropical_summerwet		calculated	tropical_summerwet
2870	300	83	629	Bronn	1851-1852		Crematopteris	typica								Scolopendrites	scolopendrioides		(Brongniart, 1828) van Konjinenburg-van Cittert et al., 2006	Osmundaceae	Osmundales	Pteridophyta	Osmundales	France	Alsace	Soultz-les-Bains	48.5682	7.47788	Locality	Soultz-les-Bains	Saxo-Thuringian	Anglo-Saxonia	240	-5.793	19.813	Europe	Buntsandstein			Anisian		Anisian	20-30°N	432	1	tropical_summerwet		calculated	tropical_summerwet
2875	300	83	629	Bronn	1851-1852		Voltzia	heterophylla		Brongniart, 1828						Voltzia	heterophylla		Brongniart, 1828	Voltziaceae	Voltziales	Coniferophyta	Voltziales	France	Alsace	Soultz-les-Bains	48.5682	7.47788	Locality	Soultz-les-Bains	Saxo-Thuringian	Anglo-Saxonia	240	-5.793	19.813	Europe	Buntsandstein			Anisian		Anisian	20-30°N	432	1	tropical_summerwet		calculated	tropical_summerwet
2877	1521	508	697	Bronn	1851-1852		Voltzia	heterophylla		Brongniart, 1828						Voltzia	heterophylla		Brongniart, 1828	Voltziaceae	Voltziales	Coniferophyta	Voltziales	Germany		Steigerwalde	49.6219	10.2633	Locality	Steigerwald	Saxo-Thuringian	Anglo-Saxonia	240	-4.454	21.506	Europe	Muschelkalk	Gypse unter dem Muschelkalk				Anisian	30-40°N	15	0.318889		tropical_summerwet	manual	tropical_summerwet
2878	2350	737	698	Bronn	1851-1852		Voltzia	heterophylla		Brongniart, 1828						Voltzia	heterophylla		Brongniart, 1828	Voltziaceae	Voltziales	Coniferophyta	Voltziales	Germany	Rhein-Bayern	Donnersberg	49.6239	7.94908	Locality	Donnersbergkreis	Mid-German Crystalline High	Anglo-Saxonia	240	-5.927	20.905	Europe	Buntsandstein			Anisian		Anisian	30-40°N	145	1	tropical_summerwet		calculated	tropical_summerwet
2879	2351	738	699	Bronn	1851-1852		Voltzia	heterophylla		Brongniart, 1828						Voltzia	heterophylla		Brongniart, 1828	Voltziaceae	Voltziales	Coniferophyta	Voltziales	Russia		Kargolo-Kupfergrube near Orenberg	51.7666	55.1005	Area	Orenburg, Russia	Volgo-Uralia	Baltica	240	20.597	39.697	Europe	Buntsandstein			Anisian		Anisian	40-50°N	1	0.333333		tropical_summerwet	manual	tropical_summerwet
2880	2353	740	700	Bronn	1851-1852		Voltzia	heterophylla		Brongniart, 1828						Voltzia	heterophylla		Brongniart, 1828	Voltziaceae	Voltziales	Coniferophyta	Voltziales	USA		Massachusetts	42.4072	-71.3824	Locality		Saint Laurent	Appalachian	240	-39.413	12.341	North America	Buntsandstein			Anisian		Anisian	20-30°N	1	0.333333		tropical_summerwet	manual	tropical_summerwet
2882	64	480	701	Bronn	1858		Pterophyllum	minus		Brongniart	pl. 9, fig. 2				?	Anomozamites	minus		Brongniart	incertae sedis	Bennettitales	Cycadophyta	Bennettitales	Germany		Sinsheim	49.2471	8.8821	Locality	Sinsheim	Saxo-Thuringian	Anglo-Saxonia	240	-5.172	20.799	Europe	Lettenkohle			Ladinian		Ladinian	30-40°N	591	1	tropical_summerwet		calculated	tropical_summerwet
2883	64	480	701	Bronn	1858		Chiropteris		sp.		pl. 10, 1-4					Chiropteris		sp.		incertae sedis	incertae sedis	Pteridophyta	Pteridophyta incertae sedis	Germany		Sinsheim	49.2471	8.8821	Locality	Sinsheim	Saxo-Thuringian	Anglo-Saxonia	240	-5.172	20.799	Europe	Lettenkohle			Ladinian		Ladinian	30-40°N	591	1	tropical_summerwet		calculated	tropical_summerwet
2884	64	480	701	Bronn	1858		Taeniopteris	marantacea		Presl	pl. 9, fig. 3					Danaeopsis	marantaceae		(Presl in Sternberg, 1838) Schimper, 1869	Marattiaceae	Marattiales	Pteridophyta	Marattiales	Germany		Sinsheim	49.2471	8.8821	Locality	Sinsheim	Saxo-Thuringian	Anglo-Saxonia	240	-5.172	20.799	Europe	Lettenkohle			Ladinian		Ladinian	30-40°N	591	1	tropical_summerwet		calculated	tropical_summerwet
2885	64	480	701	Bronn	1858		Noeggerathia	vogesiaca			pl. 6, fig. 1-4					Pelourdea	vogesiaca		(Schimper et Mougeot) Seward 1917	incertae sedis	incertae sedis	Coniferophyta	Coniferophyta incertae sedis	Germany		Sinsheim	49.2471	8.8821	Locality	Sinsheim	Saxo-Thuringian	Anglo-Saxonia	240	-5.172	20.799	Europe	Lettenkohle			Ladinian		Ladinian	30-40°N	591	1	tropical_summerwet		calculated	tropical_summerwet
2886	64	480	701	Bronn	1858		Phylladelphia	strigata		Bronn, 1858	pl. 7, fig. 2-3					Phylladelphia	strigata		Bronn, 1858	incertae sedis	incertae sedis	incertae sedis	incertae sedis incertae sedis	Germany		Sinsheim	49.2471	8.8821	Locality	Sinsheim	Saxo-Thuringian	Anglo-Saxonia	240	-5.172	20.799	Europe	Lettenkohle			Ladinian		Ladinian	30-40°N	591	1	tropical_summerwet		calculated	tropical_summerwet
2887	64	480	701	Bronn	1858		Voltzia	heterophylla		Schimper et Mougeot, 1844	pl. 8, fig. 1-5, pl. 9, fig. 1					Voltzia	heterophylla		Brongniart, 1828	Voltziaceae	Voltziales	Coniferophyta	Voltziales	Germany		Sinsheim	49.2471	8.8821	Locality	Sinsheim	Saxo-Thuringian	Anglo-Saxonia	240	-5.172	20.799	Europe	Lettenkohle			Ladinian		Ladinian	30-40°N	591	1	tropical_summerwet		calculated	tropical_summerwet
2893	1797	437	704	Brunner & Kelber	1988		Neocalamites	merianii								Neocalamites	merianii		(Brongniart, 1828) Halle, 1908	Equisetaceae	Equisetales	Sphenophyta	Equisetales	Germany		Straßenbaustelle am Wolfgangberg bei Ochsenfurt	49.6633	10.0701	City	Ochsenfurt	Saxo-Thuringian	Anglo-Saxonia	240	-4.595	21.493	Europe	Lettenkeuper	Blaue und grüne Tone mit Horizont der Roteisensteinkonkretionen		Ladinian		Ladinian	30-40°N	932	1	tropical_summerwet		calculated	tropical_summerwet
2894	1799	24	705	Brunner & Kelber	1988		Neocalamites	merianii								Neocalamites	merianii		(Brongniart, 1828) Halle, 1908	Equisetaceae	Equisetales	Sphenophyta	Equisetales	Germany		Werksteinbruch westlich von Schleerieth	50.0175	10.098	Locality	Schleerieth	Saxo-Thuringian	Anglo-Saxonia	240	-4.734	21.823	Europe	Lettenkeuper	Blaue und grüne Tone mit Horizont der Roteisensteinkonkretionen		Ladinian		Ladinian	30-40°N	593	1	tropical_summerwet		calculated	tropical_summerwet
2913	939	348	712	Burij & Zharnikova	1980		Cladophlebis	nebbensis		(Brongniart) Font.						Cladophlebis	nebbensis		(Brongniart) Font.	Osmundaceae	Osmundales	Pteridophyta	Osmundales	Russia	Southern Primorye	Vladivostok	43.1198	131.887	Locality	Wladivostok	North Khanka	Altai-Mongolia	240	109.397	52.279	Altai-Mongolia	Kipariskaya stage	lower part	bed 12	Ladinian		Ladinian	60-70°N	21	0.28254		warm_temperate	manual	warm_temperate
2914	939	348	712	Burij & Zharnikova	1980		Cladophlebis		sp.							Cladophlebis		sp.		Osmundaceae	Osmundales	Pteridophyta	Osmundales	Russia	Southern Primorye	Vladivostok	43.1198	131.887	Locality	Wladivostok	North Khanka	Altai-Mongolia	240	109.397	52.279	Altai-Mongolia	Kipariskaya stage	lower part	bed 8	Ladinian		Ladinian	60-70°N	21	0.28254		warm_temperate	manual	warm_temperate
2915	939	348	712	Burij & Zharnikova	1980		Cladophlebis	stenolopha	cf.	Brick						Cladophlebis	stenolopha	cf.	Brick	Osmundaceae	Osmundales	Pteridophyta	Osmundales	Russia	Southern Primorye	Vladivostok	43.1198	131.887	Locality	Wladivostok	North Khanka	Altai-Mongolia	240	109.397	52.279	Altai-Mongolia	Kipariskaya stage	lower part	bed 8	Ladinian		Ladinian	60-70°N	21	0.28254		warm_temperate	manual	warm_temperate
2916	939	348	712	Burij & Zharnikova	1980		Clathropteris		sp.							Clathropteris		sp.		Dipteridaceae	Filicales	Pteridophyta	Filicales	Russia	Southern Primorye	Vladivostok	43.1198	131.887	Locality	Wladivostok	North Khanka	Altai-Mongolia	240	109.397	52.279	Altai-Mongolia	Kipariskaya stage	lower part	bed 12	Ladinian		Ladinian	60-70°N	21	0.28254		warm_temperate	manual	warm_temperate
2917	939	348	712	Burij & Zharnikova	1980		Equisetites		sp.							Equisetites		sp.		Equisetaceae	Equisetales	Sphenophyta	Equisetales	Russia	Southern Primorye	Vladivostok	43.1198	131.887	Locality	Wladivostok	North Khanka	Altai-Mongolia	240	109.397	52.279	Altai-Mongolia	Kipariskaya stage	lower part	bed 12	Ladinian		Ladinian	60-70°N	21	0.28254		warm_temperate	manual	warm_temperate
2918	939	348	712	Burij & Zharnikova	1980		Glossophyllum		sp.							Glossophyllum		sp.		incertae sedis	incertae sedis	Gymnospermae	Glossopteridales	Russia	Southern Primorye	Vladivostok	43.1198	131.887	Locality	Wladivostok	North Khanka	Altai-Mongolia	240	109.397	52.279	Altai-Mongolia	Kipariskaya stage	lower part	bed 12	Ladinian		Ladinian	60-70°N	21	0.28254		warm_temperate	manual	warm_temperate
2919	939	348	712	Burij & Zharnikova	1980		Neocalamites	hoerensis		(Schimper) Halle						Neocalamites	hoerensis		(Schimper) Halle	Equisetaceae	Equisetales	Sphenophyta	Equisetales	Russia	Southern Primorye	Vladivostok	43.1198	131.887	Locality	Wladivostok	North Khanka	Altai-Mongolia	240	109.397	52.279	Altai-Mongolia	Kipariskaya stage	lower part	bed 12B	Ladinian		Ladinian	60-70°N	21	0.28254		warm_temperate	manual	warm_temperate
2920	939	348	712	Burij & Zharnikova	1980		Neocalamites	hoerensis	cf.	(Schimper) Halle						Neocalamites	hoerensis	cf.	(Schimper) Halle	Equisetaceae	Equisetales	Sphenophyta	Equisetales	Russia	Southern Primorye	Vladivostok	43.1198	131.887	Locality	Wladivostok	North Khanka	Altai-Mongolia	240	109.397	52.279	Altai-Mongolia	Kipariskaya stage	lower part	bed 12	Ladinian		Ladinian	60-70°N	21	0.28254		warm_temperate	manual	warm_temperate
2921	939	348	712	Burij & Zharnikova	1980		Neocalamites		sp.							Neocalamites		sp.		Equisetaceae	Equisetales	Sphenophyta	Equisetales	Russia	Southern Primorye	Vladivostok	43.1198	131.887	Locality	Wladivostok	North Khanka	Altai-Mongolia	240	109.397	52.279	Altai-Mongolia	Kipariskaya stage	lower part	bed 8	Ladinian		Ladinian	60-70°N	21	0.28254		warm_temperate	manual	warm_temperate
2922	939	348	712	Burij & Zharnikova	1980		Podozamites	nordenskioldii	ex gr.	(Heer) Nathorst						Podozamites	nordenskioldii	ex gr.	(Heer) Nathorst	Podocarpaceae	Coniferales	Coniferophyta	Coniferales	Russia	Southern Primorye	Vladivostok	43.1198	131.887	Locality	Wladivostok	North Khanka	Altai-Mongolia	240	109.397	52.279	Altai-Mongolia	Kipariskaya stage	lower part	bed 12	Ladinian		Ladinian	60-70°N	21	0.28254		warm_temperate	manual	warm_temperate
2923	939	348	712	Burij & Zharnikova	1980		Podozamites		sp.							Podozamites		sp.		Podocarpaceae	Coniferales	Coniferophyta	Coniferales	Russia	Southern Primorye	Vladivostok	43.1198	131.887	Locality	Wladivostok	North Khanka	Altai-Mongolia	240	109.397	52.279	Altai-Mongolia	Kipariskaya stage	lower part	bed 4	Ladinian		Ladinian	60-70°N	21	0.28254		warm_temperate	manual	warm_temperate
2924	939	348	712	Burij & Zharnikova	1980		Schizoneura	grandifolia		Krysht. Et Pryn						Schizoneura	grandifolia		Krysht. et Pryn	Equisetaceae	Equisetales	Sphenophyta	Equisetales	Russia	Southern Primorye	Vladivostok	43.1198	131.887	Locality	Wladivostok	North Khanka	Altai-Mongolia	240	109.397	52.279	Altai-Mongolia	Kipariskaya stage	lower part	bed 12	Ladinian		Ladinian	60-70°N	21	0.28254		warm_temperate	manual	warm_temperate
2925	939	348	712	Burij & Zharnikova	1980		Taeniopteris	ensis		(Oldh) Zeiller						Taeniopteris	ensis		(Oldh) Zeiller	Taeniopteridaceae	incertae sedis	Pteridophylla	Pteridophylla incertae sedis	Russia	Southern Primorye	Vladivostok	43.1198	131.887	Locality	Wladivostok	North Khanka	Altai-Mongolia	240	109.397	52.279	Altai-Mongolia	Kipariskaya stage	lower part	bed 12	Ladinian		Ladinian	60-70°N	21	0.28254		warm_temperate	manual	warm_temperate
2926	939	348	712	Burij & Zharnikova	1980		Taeniopteris	lanceolata		Oishi						Taeniopteris	lanceolata		Oishi	Taeniopteridaceae	incertae sedis	Pteridophylla	Pteridophylla incertae sedis	Russia	Southern Primorye	Vladivostok	43.1198	131.887	Locality	Wladivostok	North Khanka	Altai-Mongolia	240	109.397	52.279	Altai-Mongolia	Kipariskaya stage	lower part	bed 10	Ladinian		Ladinian	60-70°N	21	0.28254		warm_temperate	manual	warm_temperate
2927	939	348	712	Burij & Zharnikova	1980		Taeniopteris	lanceolata	var. minima	Srebrod.						Taeniopteris	lanceolata	var. minima	Srebrod.	Taeniopteridaceae	incertae sedis	Pteridophylla	Pteridophylla incertae sedis	Russia	Southern Primorye	Vladivostok	43.1198	131.887	Locality	Wladivostok	North Khanka	Altai-Mongolia	240	109.397	52.279	Altai-Mongolia	Kipariskaya stage	lower part	bed 10	Ladinian		Ladinian	60-70°N	21	0.28254		warm_temperate	manual	warm_temperate
2928	939	348	712	Burij & Zharnikova	1980		Taeniopteris		sp.							Taeniopteris		sp.		Taeniopteridaceae	incertae sedis	Pteridophylla	Pteridophylla incertae sedis	Russia	Southern Primorye	Vladivostok	43.1198	131.887	Locality	Wladivostok	North Khanka	Altai-Mongolia	240	109.397	52.279	Altai-Mongolia	Kipariskaya stage	lower part	bed 4	Ladinian		Ladinian	60-70°N	21	0.28254		warm_temperate	manual	warm_temperate
2929	939	348	712	Burij & Zharnikova	1980		Taeniopteris	stenophylla		Krysht.						Taeniopteris	stenophylla		Kryshtofovich	Taeniopteridaceae	incertae sedis	Pteridophylla	Pteridophylla incertae sedis	Russia	Southern Primorye	Vladivostok	43.1198	131.887	Locality	Wladivostok	North Khanka	Altai-Mongolia	240	109.397	52.279	Altai-Mongolia	Kipariskaya stage	lower part	bed 8	Ladinian		Ladinian	60-70°N	21	0.28254		warm_temperate	manual	warm_temperate
2930	939	348	712	Burij & Zharnikova	1980		Taeniopteris	stenophylla		Krysht.						Taeniopteris	stenophylla		Kryshtofovich	Taeniopteridaceae	incertae sedis	Pteridophylla	Pteridophylla incertae sedis	Russia	Southern Primorye	Vladivostok	43.1198	131.887	Locality	Wladivostok	North Khanka	Altai-Mongolia	240	109.397	52.279	Altai-Mongolia	Kipariskaya stage	lower part	bed 12	Ladinian		Ladinian	60-70°N	21	0.28254		warm_temperate	manual	warm_temperate
2931	939	348	712	Burij & Zharnikova	1980		Taeniopteris	stenophylla	var. Mongolica	Srebrod.						Taeniopteris	stenophylla		Kryshtofovich	Taeniopteridaceae	incertae sedis	Pteridophylla	Pteridophylla incertae sedis	Russia	Southern Primorye	Vladivostok	43.1198	131.887	Locality	Wladivostok	North Khanka	Altai-Mongolia	240	109.397	52.279	Altai-Mongolia	Kipariskaya stage	lower part	bed 10	Ladinian		Ladinian	60-70°N	21	0.28254		warm_temperate	manual	warm_temperate
2932	939	348	712	Burij & Zharnikova	1980		Taeniopteris	stenophylla	var. Mongolica	Srebrod.						Taeniopteris	stenophylla		Kryshtofovich	Taeniopteridaceae	incertae sedis	Pteridophylla	Pteridophylla incertae sedis	Russia	Southern Primorye	Vladivostok	43.1198	131.887	Locality	Wladivostok	North Khanka	Altai-Mongolia	240	109.397	52.279	Altai-Mongolia	Kipariskaya stage	lower part	bed 12	Ladinian		Ladinian	60-70°N	21	0.28254		warm_temperate	manual	warm_temperate
2933	939	348	712	Burij & Zharnikova	1980		Todites	giganteus		(Oishi)						Todites	giganteus		(Oishi)	Osmundaceae	Osmundales	Pteridophyta	Osmundales	Russia	Southern Primorye	Vladivostok	43.1198	131.887	Locality	Wladivostok	North Khanka	Altai-Mongolia	240	109.397	52.279	Altai-Mongolia	Kipariskaya stage	lower part	bed 12	Ladinian		Ladinian	60-70°N	21	0.28254		warm_temperate	manual	warm_temperate
2944	193	661	714	Calligaris	1986		Braiescycas	leonardii		Calligaris, 1986						Braiescycas	leonardii		Calligaris, 1986	incertae sedis	Cycadales	Cycadophyta	Cycadales	Italy	Bozen/Bolzano	Seewald, Prags/Braies	46.6943	12.0854	Locality	Prags/Braies	Carnic Alps - South Karawanken	Western Europe - Alps	240	-3.747	13.401	Europe	Wengener Schichten			upper Ladinian		Ladinian	20-30°N	207	1	tropical_summerwet		calculated	tropical_summerwet
2945	926	341	715	Calligaris	1986		Cladophlebis	denticulata	cf.	Brongniart						Cladophlebis	denticulata	cf.	(Brongniart) Fontaine	Osmundaceae	Osmundales	Pteridophyta	Osmundales	Italy	Bozen/Bolzano	Pelmo, Val Zoldana	46.4004	12.1226	Locality	Pelmo	Carnic Alps - South Karawanken	Western Europe - Alps	240	-3.676	13.114	Europe	Wengener Schichten			upper Ladinian		Ladinian	20-30°N	207	1	tropical_summerwet		calculated	tropical_summerwet
2946	926	341	715	Calligaris	1986		Cladophlebis	leuthardti		Leonardi, 1953						Cladophlebis	leuthardtii		Leonardi, 1953	Osmundaceae	Osmundales	Pteridophyta	Osmundales	Italy	Bozen/Bolzano	Pelmo, Val Zoldana	46.4004	12.1226	Locality	Pelmo	Carnic Alps - South Karawanken	Western Europe - Alps	240	-3.676	13.114	Europe	Wengener Schichten			upper Ladinian		Ladinian	20-30°N	207	1	tropical_summerwet		calculated	tropical_summerwet
2947	193	661	714	Calligaris	1986		Cladophlebis	leuthardti		Leonardi, 1953						Cladophlebis	leuthardtii		Leonardi, 1953	Osmundaceae	Osmundales	Pteridophyta	Osmundales	Italy	Bozen/Bolzano	Seewald, Prags/Braies	46.6943	12.0854	Locality	Prags/Braies	Carnic Alps - South Karawanken	Western Europe - Alps	240	-3.747	13.401	Europe	Wengener Schichten			upper Ladinian		Ladinian	20-30°N	207	1	tropical_summerwet		calculated	tropical_summerwet
2948	926	341	715	Calligaris	1986		Cladophlebis	ruetimeyeri		Heer						Cladophlebis	ruetimeyeri		(Heer) Leonardi, 1953	Osmundaceae	Osmundales	Pteridophyta	Osmundales	Italy	Bozen/Bolzano	Pelmo, Val Zoldana	46.4004	12.1226	Locality	Pelmo	Carnic Alps - South Karawanken	Western Europe - Alps	240	-3.676	13.114	Europe	Wengener Schichten			upper Ladinian		Ladinian	20-30°N	207	1	tropical_summerwet		calculated	tropical_summerwet
2949	1033	659	716	Calligaris	1986		Cladophlebis	ruetimeyeri	cf.	Heer						Cladophlebis	ruetimeyeri	cf.	(Heer) Leonardi, 1953	Osmundaceae	Osmundales	Pteridophyta	Osmundales	Italy	Bozen/Bolzano	Val Badia	46.6011	11.9115	Area		Carnic Alps - South Karawanken	Western Europe - Alps	240	-3.854	13.292	Europe	Wengener Schichten			upper Ladinian		Ladinian	20-30°N	207	1	tropical_summerwet		calculated	tropical_summerwet
2950	926	341	715	Calligaris	1986		Cladophlebis	ruetimeyeri	var. Heeri	Leonardi, 1953						Cladophlebis	ruetimeyeri		(Heer) Leonardi, 1953	Osmundaceae	Osmundales	Pteridophyta	Osmundales	Italy	Bozen/Bolzano	Pelmo, Val Zoldana	46.4004	12.1226	Locality	Pelmo	Carnic Alps - South Karawanken	Western Europe - Alps	240	-3.676	13.114	Europe	Wengener Schichten			upper Ladinian		Ladinian	20-30°N	207	1	tropical_summerwet		calculated	tropical_summerwet
2951	926	341	715	Calligaris	1986		Pecopteris	reticulata	cf.	Leonardi, 1953						Cladophlebis	ruetimeyeri	cf.	(Heer) Leonardi, 1953	Osmundaceae	Osmundales	Pteridophyta	Osmundales	Italy	Bozen/Bolzano	Pelmo, Val Zoldana	46.4004	12.1226	Locality	Pelmo	Carnic Alps - South Karawanken	Western Europe - Alps	240	-3.676	13.114	Europe	Wengener Schichten			upper Ladinian		Ladinian	20-30°N	207	1	tropical_summerwet		calculated	tropical_summerwet
2952	926	341	715	Calligaris	1986		Cladophlebis		sp.							Cladophlebis		sp.		Osmundaceae	Osmundales	Pteridophyta	Osmundales	Italy	Bozen/Bolzano	Pelmo, Val Zoldana	46.4004	12.1226	Locality	Pelmo	Carnic Alps - South Karawanken	Western Europe - Alps	240	-3.676	13.114	Europe	Wengener Schichten			upper Ladinian		Ladinian	20-30°N	207	1	tropical_summerwet		calculated	tropical_summerwet
2953	927	342	717	Calligaris	1986	?	Cycadeoidea	moroderi		Leonardi, 1953					?	Dioonitocarpidium	moroderi			incertae sedis	Cycadales	Cycadophyta	Cycadales	Italy	Dolomites	Seiser Alm/Alpe di Siusi	46.5341	11.7603	Area	Seiser Alm/Alpe di Siusi	Carnic Alps - South Karawanken	Western Europe - Alps	240	-3.95	13.21	Europe	Wengener Schichten			upper Ladinian		Ladinian	20-30°N	207	1	tropical_summerwet		calculated	tropical_summerwet
2954	193	661	714	Calligaris	1986	?	Cycadeoidea		sp.						?	Dioonitocarpidium		sp.		incertae sedis	Cycadales	Cycadophyta	Cycadales	Italy	Bozen/Bolzano	Seewald, Prags/Braies	46.6943	12.0854	Locality	Prags/Braies	Carnic Alps - South Karawanken	Western Europe - Alps	240	-3.747	13.401	Europe	Wengener Schichten			upper Ladinian		Ladinian	20-30°N	207	1	tropical_summerwet		calculated	tropical_summerwet
2955	1268	284	718	Calligaris	1986	?	Cycadeoidea		sp.						?	Dioonitocarpidium		sp.		incertae sedis	Cycadales	Cycadophyta	Cycadales	Italy	Bozen/Bolzano	Val Gardena	46.5518	11.7386	Area		Carnic Alps - South Karawanken	Western Europe - Alps	240	-3.967	13.226	Europe	Wengener Schichten			upper Ladinian		Ladinian	20-30°N	207	1	tropical_summerwet		calculated	tropical_summerwet
2956	926	341	715	Calligaris	1986		Equisetites		sp.							Equisetites		sp.		Equisetaceae	Equisetales	Sphenophyta	Equisetales	Italy	Bozen/Bolzano	Pelmo, Val Zoldana	46.4004	12.1226	Locality	Pelmo	Carnic Alps - South Karawanken	Western Europe - Alps	240	-3.676	13.114	Europe	Wengener Schichten			upper Ladinian		Ladinian	20-30°N	207	1	tropical_summerwet		calculated	tropical_summerwet
2957	1268	284	718	Calligaris	1986		Equisetites		sp.							Equisetites		sp.		Equisetaceae	Equisetales	Sphenophyta	Equisetales	Italy	Bozen/Bolzano	Val Gardena	46.5518	11.7386	Area		Carnic Alps - South Karawanken	Western Europe - Alps	240	-3.967	13.226	Europe	Wengener Schichten			upper Ladinian		Ladinian	20-30°N	207	1	tropical_summerwet		calculated	tropical_summerwet
2958	193	661	714	Calligaris	1986		Ginkgo		sp.							Ginkgo		sp.		Ginkgoaceae	Ginkgoales	Ginkgophyta	Ginkgoales	Italy	Bozen/Bolzano	Seewald, Prags/Braies	46.6943	12.0854	Locality	Prags/Braies	Carnic Alps - South Karawanken	Western Europe - Alps	240	-3.747	13.401	Europe	Wengener Schichten			upper Ladinian		Ladinian	20-30°N	207	1	tropical_summerwet		calculated	tropical_summerwet
2959	926	341	715	Calligaris	1986	cf.	Lomatopteris		sp.						cf.	Lomatopteris		sp.		incertae sedis	Corystospermales	Pteridospermatophyta	Corystospermales	Italy	Bozen/Bolzano	Pelmo, Val Zoldana	46.4004	12.1226	Locality	Pelmo	Carnic Alps - South Karawanken	Western Europe - Alps	240	-3.676	13.114	Europe	Wengener Schichten			upper Ladinian		Ladinian	20-30°N	207	1	tropical_summerwet		calculated	tropical_summerwet
2960	926	341	715	Calligaris	1986		Neuropteridium	ruetimeyeri	cf.	Heer						Cladophlebis	ruetimeyeri	cf.	Heer	Osmundaceae	Osmundales	Pteridophyta	Osmundales	Italy	Bozen/Bolzano	Pelmo, Val Zoldana	46.4004	12.1226	Locality	Pelmo	Carnic Alps - South Karawanken	Western Europe - Alps	240	-3.676	13.114	Europe	Wengener Schichten			upper Ladinian		Ladinian	20-30°N	207	1	tropical_summerwet		calculated	tropical_summerwet
2961	926	341	715	Calligaris	1986		Neuropteridium		sp.							Neuropteridium		sp.		Osmundaceae	Osmundales	Pteridophyta	Osmundales	Italy	Bozen/Bolzano	Pelmo, Val Zoldana	46.4004	12.1226	Locality	Pelmo	Carnic Alps - South Karawanken	Western Europe - Alps	240	-3.676	13.114	Europe	Wengener Schichten			upper Ladinian		Ladinian	20-30°N	207	1	tropical_summerwet		calculated	tropical_summerwet
2962	193	661	714	Calligaris	1986		Neuropteridium		sp.							Neuropteridium		sp.		Osmundaceae	Osmundales	Pteridophyta	Osmundales	Italy	Bozen/Bolzano	Seewald, Prags/Braies	46.6943	12.0854	Locality	Prags/Braies	Carnic Alps - South Karawanken	Western Europe - Alps	240	-3.747	13.401	Europe	Wengener Schichten			upper Ladinian		Ladinian	20-30°N	207	1	tropical_summerwet		calculated	tropical_summerwet
2963	926	341	715	Calligaris	1986	cf.	Neuropteridium		sp.						cf.	Neuropteridium		sp.		Osmundaceae	Osmundales	Pteridophyta	Osmundales	Italy	Bozen/Bolzano	Pelmo, Val Zoldana	46.4004	12.1226	Locality	Pelmo	Carnic Alps - South Karawanken	Western Europe - Alps	240	-3.676	13.114	Europe	Wengener Schichten			upper Ladinian		Ladinian	20-30°N	207	1	tropical_summerwet		calculated	tropical_summerwet
2964	1033	659	716	Calligaris	1986		Nilssonia		sp.							Nilssonia		sp.		incertae sedis	Cycadales	Cycadophyta	Cycadales	Italy	Bozen/Bolzano	Val Badia	46.6011	11.9115	Area		Carnic Alps - South Karawanken	Western Europe - Alps	240	-3.854	13.292	Europe	Wengener Schichten			upper Ladinian		Ladinian	20-30°N	207	1	tropical_summerwet		calculated	tropical_summerwet
2965	193	661	714	Calligaris	1986		Odontopteris		sp.							Odontopteris		sp.		incertae sedis	Medullosales	Pteridospermatophyta	Medullosales	Italy	Bozen/Bolzano	Seewald, Prags/Braies	46.6943	12.0854	Locality	Prags/Braies	Carnic Alps - South Karawanken	Western Europe - Alps	240	-3.747	13.401	Europe	Wengener Schichten			upper Ladinian		Ladinian	20-30°N	207	1	tropical_summerwet		calculated	tropical_summerwet
2966	193	661	714	Calligaris	1986		Pagiophyllum	foetterlei	cf.							Pagiophyllum	foetterlei	cf.	Stur	incertae sedis	Coniferales	Coniferophyta	Coniferales	Italy	Bozen/Bolzano	Seewald, Prags/Braies	46.6943	12.0854	Locality	Prags/Braies	Carnic Alps - South Karawanken	Western Europe - Alps	240	-3.747	13.401	Europe	Wengener Schichten			upper Ladinian		Ladinian	20-30°N	207	1	tropical_summerwet		calculated	tropical_summerwet
2967	193	661	714	Calligaris	1986		Pagiophyllum	massalongi	cf.							Pagiophyllum	massalongi	cf.	De Zigno	incertae sedis	Coniferales	Coniferophyta	Coniferales	Italy	Bozen/Bolzano	Seewald, Prags/Braies	46.6943	12.0854	Locality	Prags/Braies	Carnic Alps - South Karawanken	Western Europe - Alps	240	-3.747	13.401	Europe	Wengener Schichten			upper Ladinian		Ladinian	20-30°N	207	1	tropical_summerwet		calculated	tropical_summerwet
2968	1268	284	718	Calligaris	1986	?	Pagiophyllum	massalongi	cf.	De Zigno					?	Pagiophyllum	massalongi	cf.	De Zigno	incertae sedis	Coniferales	Coniferophyta	Coniferales	Italy	Bozen/Bolzano	Val Gardena	46.5518	11.7386	Area		Carnic Alps - South Karawanken	Western Europe - Alps	240	-3.967	13.226	Europe	Wengener Schichten			upper Ladinian		Ladinian	20-30°N	207	1	tropical_summerwet		calculated	tropical_summerwet
2969	193	661	714	Calligaris	1986		Pagiophyllum		sp.							Pagiophyllum		sp.		incertae sedis	Coniferales	Coniferophyta	Coniferales	Italy	Bozen/Bolzano	Seewald, Prags/Braies	46.6943	12.0854	Locality	Prags/Braies	Carnic Alps - South Karawanken	Western Europe - Alps	240	-3.747	13.401	Europe	Wengener Schichten			upper Ladinian		Ladinian	20-30°N	207	1	tropical_summerwet		calculated	tropical_summerwet
2970	193	661	714	Calligaris	1986		Pecopteris		sp.							Pecopteris		sp.		Osmundaceae	Osmundales	Pteridophyta	Osmundales	Italy	Bozen/Bolzano	Seewald, Prags/Braies	46.6943	12.0854	Locality	Prags/Braies	Carnic Alps - South Karawanken	Western Europe - Alps	240	-3.747	13.401	Europe	Wengener Schichten			upper Ladinian		Ladinian	20-30°N	207	1	tropical_summerwet		calculated	tropical_summerwet
2971	193	661	714	Calligaris	1986		Yuccites		sp.							Pelourdea		sp.		incertae sedis	incertae sedis	Coniferophyta	Coniferophyta incertae sedis	Italy	Bozen/Bolzano	Seewald, Prags/Braies	46.6943	12.0854	Locality	Prags/Braies	Carnic Alps - South Karawanken	Western Europe - Alps	240	-3.747	13.401	Europe	Wengener Schichten			upper Ladinian		Ladinian	20-30°N	207	1	tropical_summerwet		calculated	tropical_summerwet
2972	926	341	715	Calligaris	1986	?	Yuccites		sp.						?	Pelourdea		sp.		incertae sedis	incertae sedis	Coniferophyta	Coniferophyta incertae sedis	Italy	Bozen/Bolzano	Pelmo, Val Zoldana	46.4004	12.1226	Locality	Pelmo	Carnic Alps - South Karawanken	Western Europe - Alps	240	-3.676	13.114	Europe	Wengener Schichten			upper Ladinian		Ladinian	20-30°N	207	1	tropical_summerwet		calculated	tropical_summerwet
2973	1268	284	718	Calligaris	1986		Yuccites	vogesiacus	cf.	Schimper						Pelourdea	vogesiaca	cf.	(Schimper et Mougeot) Seward 1917	incertae sedis	incertae sedis	Coniferophyta	Coniferophyta incertae sedis	Italy	Bozen/Bolzano	Val Gardena	46.5518	11.7386	Area		Carnic Alps - South Karawanken	Western Europe - Alps	240	-3.967	13.226	Europe	Wengener Schichten			upper Ladinian		Ladinian	20-30°N	207	1	tropical_summerwet		calculated	tropical_summerwet
2974	1033	659	716	Calligaris	1986		Taeniopteris	angustifolia		Schenk						Taeniopteris	kelberi		Kustatscher et van Konijnenburg-van Cittert, 2010	Taeniopteridaceae	incertae sedis	Pteridophylla	Pteridophylla incertae sedis	Italy	Bozen/Bolzano	Val Badia	46.6011	11.9115	Area		Carnic Alps - South Karawanken	Western Europe - Alps	240	-3.854	13.292	Europe	Wengener Schichten			upper Ladinian		Ladinian	20-30°N	207	1	tropical_summerwet		calculated	tropical_summerwet
2975	926	341	715	Calligaris	1986	cf.	Taeniopteris		sp.						cf.	Taeniopteris		sp.		Taeniopteridaceae	incertae sedis	Pteridophylla	Pteridophylla incertae sedis	Italy	Bozen/Bolzano	Pelmo, Val Zoldana	46.4004	12.1226	Locality	Pelmo	Carnic Alps - South Karawanken	Western Europe - Alps	240	-3.676	13.114	Europe	Wengener Schichten			upper Ladinian		Ladinian	20-30°N	207	1	tropical_summerwet		calculated	tropical_summerwet
2976	926	341	715	Calligaris	1986		Thinnfeldia	richthofeni		Stur						Thinnfeldia	richthofeni		Stur	incertae sedis	Corystospermales	Pteridospermatophyta	Corystospermales	Italy	Bozen/Bolzano	Pelmo, Val Zoldana	46.4004	12.1226	Locality	Pelmo	Carnic Alps - South Karawanken	Western Europe - Alps	240	-3.676	13.114	Europe	Wengener Schichten			upper Ladinian		Ladinian	20-30°N	207	1	tropical_summerwet		calculated	tropical_summerwet
2977	1033	659	716	Calligaris	1986		Thinnfeldia	richthofeni		Stur						Thinnfeldia	richthofeni		Stur	incertae sedis	Corystospermales	Pteridospermatophyta	Corystospermales	Italy	Bozen/Bolzano	Val Badia	46.6011	11.9115	Area		Carnic Alps - South Karawanken	Western Europe - Alps	240	-3.854	13.292	Europe	Wengener Schichten			upper Ladinian		Ladinian	20-30°N	207	1	tropical_summerwet		calculated	tropical_summerwet
2978	926	341	715	Calligaris	1986	?	Thyrsopteris		sp.						?	Thyrsopteris		sp.		incertae sedis	incertae sedis	incertae sedis	incertae sedis incertae sedis	Italy	Bozen/Bolzano	Pelmo, Val Zoldana	46.4004	12.1226	Locality	Pelmo	Carnic Alps - South Karawanken	Western Europe - Alps	240	-3.676	13.114	Europe	Wengener Schichten			upper Ladinian		Ladinian	20-30°N	207	1	tropical_summerwet		calculated	tropical_summerwet
2979	926	341	715	Calligaris	1986		Tingia	jaegeri		Brongniart						Tingia	jaegeri		Brongniart	incertae sedis	Noeggerathiales	Gymnospermae	Noeggerathiales	Italy	Bozen/Bolzano	Pelmo, Val Zoldana	46.4004	12.1226	Locality	Pelmo	Carnic Alps - South Karawanken	Western Europe - Alps	240	-3.676	13.114	Europe	Wengener Schichten			upper Ladinian		Ladinian	20-30°N	207	1	tropical_summerwet		calculated	tropical_summerwet
2980	193	661	714	Calligaris	1986		Tingia		sp.							Tingia		sp.		incertae sedis	Noeggerathiales	Gymnospermae	Noeggerathiales	Italy	Bozen/Bolzano	Seewald, Prags/Braies	46.6943	12.0854	Locality	Prags/Braies	Carnic Alps - South Karawanken	Western Europe - Alps	240	-3.747	13.401	Europe	Wengener Schichten			upper Ladinian		Ladinian	20-30°N	207	1	tropical_summerwet		calculated	tropical_summerwet
2981	1268	284	718	Calligaris	1986		Tingia		sp.							Tingia		sp.		incertae sedis	Noeggerathiales	Gymnospermae	Noeggerathiales	Italy	Bozen/Bolzano	Val Gardena	46.5518	11.7386	Area		Carnic Alps - South Karawanken	Western Europe - Alps	240	-3.967	13.226	Europe	Wengener Schichten			upper Ladinian		Ladinian	20-30°N	207	1	tropical_summerwet		calculated	tropical_summerwet
2982	927	342	717	Calligaris	1986		Tingia		sp.							Tingia		sp.		incertae sedis	Noeggerathiales	Gymnospermae	Noeggerathiales	Italy	Dolomites	Seiser Alm/Alpe di Siusi	46.5341	11.7603	Area	Seiser Alm/Alpe di Siusi	Carnic Alps - South Karawanken	Western Europe - Alps	240	-3.95	13.21	Europe	Wengener Schichten			upper Ladinian		Ladinian	20-30°N	207	1	tropical_summerwet		calculated	tropical_summerwet
2983	1033	659	716	Calligaris	1986		Voltzia	recubariensis	cf.	Schenk						Voltzia	recubariensis	cf.	(De Zigno) Schenk, 1868	Voltziaceae	Voltziales	Coniferophyta	Voltziales	Italy	Bozen/Bolzano	Val Badia	46.6011	11.9115	Area		Carnic Alps - South Karawanken	Western Europe - Alps	240	-3.854	13.292	Europe	Wengener Schichten			upper Ladinian		Ladinian	20-30°N	207	1	tropical_summerwet		calculated	tropical_summerwet
2984	1268	284	718	Calligaris	1986		Voltzia	recubariensis	cf.	Schenk						Voltzia	recubariensis	cf.	(De Zigno) Schenk, 1868	Voltziaceae	Voltziales	Coniferophyta	Voltziales	Italy	Bozen/Bolzano	Val Gardena	46.5518	11.7386	Area		Carnic Alps - South Karawanken	Western Europe - Alps	240	-3.967	13.226	Europe	Wengener Schichten			upper Ladinian		Ladinian	20-30°N	207	1	tropical_summerwet		calculated	tropical_summerwet
2985	927	342	717	Calligaris	1986		Voltzia	recubariensis	cf.	Schenk						Voltzia	recubariensis	cf.	(De Zigno) Schenk, 1868	Voltziaceae	Voltziales	Coniferophyta	Voltziales	Italy	Dolomites	Seiser Alm/Alpe di Siusi	46.5341	11.7603	Area	Seiser Alm/Alpe di Siusi	Carnic Alps - South Karawanken	Western Europe - Alps	240	-3.95	13.21	Europe	Wengener Schichten			upper Ladinian		Ladinian	20-30°N	207	1	tropical_summerwet		calculated	tropical_summerwet
2986	926	341	715	Calligaris	1986		Voltzia		sp.							Voltzia		sp.		Voltziaceae	Voltziales	Coniferophyta	Voltziales	Italy	Bozen/Bolzano	Pelmo, Val Zoldana	46.4004	12.1226	Locality	Pelmo	Carnic Alps - South Karawanken	Western Europe - Alps	240	-3.676	13.114	Europe	Wengener Schichten			upper Ladinian		Ladinian	20-30°N	207	1	tropical_summerwet		calculated	tropical_summerwet
2987	193	661	714	Calligaris	1986		Voltzia		sp.							Voltzia		sp.		Voltziaceae	Voltziales	Coniferophyta	Voltziales	Italy	Bozen/Bolzano	Seewald, Prags/Braies	46.6943	12.0854	Locality	Prags/Braies	Carnic Alps - South Karawanken	Western Europe - Alps	240	-3.747	13.401	Europe	Wengener Schichten			upper Ladinian		Ladinian	20-30°N	207	1	tropical_summerwet		calculated	tropical_summerwet
2988	1268	284	718	Calligaris	1986		Voltzia		sp.							Voltzia		sp.		Voltziaceae	Voltziales	Coniferophyta	Voltziales	Italy	Bozen/Bolzano	Val Gardena	46.5518	11.7386	Area		Carnic Alps - South Karawanken	Western Europe - Alps	240	-3.967	13.226	Europe	Wengener Schichten			upper Ladinian		Ladinian	20-30°N	207	1	tropical_summerwet		calculated	tropical_summerwet
2989	2310	721	719	Calligaris	1986		Voltzia		sp.							Voltzia		sp.		Voltziaceae	Voltziales	Coniferophyta	Voltziales	Italy	Bozen/Bolzano	Val Marebbe	46.6955	11.9352	Area		Carnic Alps - South Karawanken	Western Europe - Alps	240	-3.852	13.388	Europe	Wengener Schichten			upper Ladinian		Ladinian	20-30°N	207	1	tropical_summerwet		calculated	tropical_summerwet
2990	193	661	714	Calligaris	1986	?	Voltzia		sp.						?	Voltzia		sp.		Voltziaceae	Voltziales	Coniferophyta	Voltziales	Italy	Bozen/Bolzano	Seewald, Prags/Braies	46.6943	12.0854	Locality	Prags/Braies	Carnic Alps - South Karawanken	Western Europe - Alps	240	-3.747	13.401	Europe	Wengener Schichten			upper Ladinian		Ladinian	20-30°N	207	1	tropical_summerwet		calculated	tropical_summerwet
2991	926	341	715	Calligaris	1986		Voltzia	zoldana		Leonardi, 1953						Voltzia	zoldana		Leonardi, 1953	Voltziaceae	Voltziales	Coniferophyta	Voltziales	Italy	Bozen/Bolzano	Pelmo, Val Zoldana	46.4004	12.1226	Locality	Pelmo	Carnic Alps - South Karawanken	Western Europe - Alps	240	-3.676	13.114	Europe	Wengener Schichten			upper Ladinian		Ladinian	20-30°N	207	1	tropical_summerwet		calculated	tropical_summerwet
2992	1033	659	716	Calligaris	1986		Zamites		sp.							Zamites		sp.		incertae sedis	Bennettitales?	Cycadophyta	Bennettitales	Italy	Bozen/Bolzano	Val Badia	46.6011	11.9115	Area		Carnic Alps - South Karawanken	Western Europe - Alps	240	-3.854	13.292	Europe	Wengener Schichten			upper Ladinian		Ladinian	20-30°N	207	1	tropical_summerwet		calculated	tropical_summerwet
2993	1268	284	718	Calligaris	1986		Zamites		sp.							Zamites		sp.		incertae sedis	Bennettitales?	Cycadophyta	Bennettitales	Italy	Bozen/Bolzano	Val Gardena	46.5518	11.7386	Area		Carnic Alps - South Karawanken	Western Europe - Alps	240	-3.967	13.226	Europe	Wengener Schichten			upper Ladinian		Ladinian	20-30°N	207	1	tropical_summerwet		calculated	tropical_summerwet
2994	927	342	717	Calligaris	1986		Zamites		sp.							Zamites		sp.		incertae sedis	Bennettitales?	Cycadophyta	Bennettitales	Italy	Dolomites	Seiser Alm/Alpe di Siusi	46.5341	11.7603	Area	Seiser Alm/Alpe di Siusi	Carnic Alps - South Karawanken	Western Europe - Alps	240	-3.95	13.21	Europe	Wengener Schichten			upper Ladinian		Ladinian	20-30°N	207	1	tropical_summerwet		calculated	tropical_summerwet
2995	297	81	720	Calzada	1987		Aethophyllum		sp.		pl. 1, fig. 1, 3, 5					Aethophyllum		sp.		incertae sedis	Voltziales	Coniferophyta	Voltziales	Spain	Catalanides	Caldes de Montbui	41.6512	2.1352	Locality		Catalonia	Iberia	240	-14.552	13.603	Europe	upper Buntsandstein			lower Anisian		Anisian	20-30°N	22	1	tropical_summerwet		calculated	tropical_summerwet
2996	297	81	720	Calzada	1987		Pecopteris	sulziana								Anomopteris	mougeotii		Brongniart, 1828	Osmundaceae	Osmundales	Pteridophyta	Osmundales	Spain	Catalanides	Caldes de Montbui	41.6512	2.1352	Locality		Catalonia	Iberia	240	-14.552	13.603	Europe	upper Buntsandstein			lower Anisian		Anisian	20-30°N	22	1	tropical_summerwet		calculated	tropical_summerwet
2997	297	81	720	Calzada	1987		Equisetites	mougeotii	cf.	(Brongniart)	pl. 2,fig. 2, 4					Equisetites	mougeotii	cf.	(Brongniart, 1828) Wills, 1910	Equisetaceae	Equisetales	Sphenophyta	Equisetales	Spain	Catalanides	Caldes de Montbui	41.6512	2.1352	Locality		Catalonia	Iberia	240	-14.552	13.603	Europe	upper Buntsandstein			lower Anisian		Anisian	20-30°N	22	1	tropical_summerwet		calculated	tropical_summerwet
2999	297	81	720	Calzada	1987		Voltzia	heterophylla								Voltzia	heterophylla		Brongniart, 1828	Voltziaceae	Voltziales	Coniferophyta	Voltziales	Spain	Catalanides	Caldes de Montbui	41.6512	2.1352	Locality		Catalonia	Iberia	240	-14.552	13.603	Europe	upper Buntsandstein			lower Anisian		Anisian	20-30°N	22	1	tropical_summerwet		calculated	tropical_summerwet
3000	895	607	722	Cantrill & Webb	1998		Cidarophyton	rewanense		Chaloner et Turner, 1987						Cidarophyton	rewanense		Chaloner et Turner, 1987	Pleuromeiaceae	Pleuromeiales	Lycophyta	Pleuromeiales	Australia	Queensland	The Crater, L78	-17.425	145.487	Locality	Mount Hypipamee Crater	Hodgkinson-Broken Ridge	Australia	250	95.569	-49.52	Australia	Arcadia Formation, Rewan Group		F.12324	middle lower Triassic (Nammalian)		Olenekian	30-40°N	4	0.416667		warm_temperate	manual	warm_temperate
3004	895	607	722	Cantrill & Webb	1998		Cyclostrobus	clavatus		Cantrill et Webb, 1998						Cyclostrobus	clavatus		Cantrill et Webb, 1998	Pleuromeiaceae	Pleuromeiales	Lycophyta	Pleuromeiales	Australia	Queensland	The Crater, L78	-17.425	145.487	Locality	Mount Hypipamee Crater	Hodgkinson-Broken Ridge	Australia	250	95.569	-49.52	Australia	Arcadia Formation, Rewan Group		F.13401	middle lower Triassic (Nammalian)		Olenekian	30-40°N	4	0.416667		warm_temperate	manual	warm_temperate
3006	1286	560	726	Cantrill & Webb	1998		Duckworthia	isoeteformis		Cantrill et Webb, 1998						Duckworthia	isoeteformis		Cantrill et Webb, 1998	incertae sedis	Lycopodiales	Lycophyta	Lycopodiales	Australia	Bowen Basin, eastern Australia	Duckworth CreekM L126	-23.5159	149.218	Locality		Sydney Basin	Australia	250	101.176	-55.666	Australia	Arcadia Formation, Rewan Group		F.33262	middle lower Triassic (Nammalian)		Olenekian	40-50°S	2	1	warm_temperate		calculated	warm_temperate
3007	1688	560	727	Cantrill & Webb	1998		Helicorhiza	duckworthensis		Cantrill et Webb, 1998						Helicorhiza	duckworthensis		Cantrill et Webb, 1998	incertae sedis	incertae sedis	Lycophyta	Lycophyta incertae sedis	Australia	Bowen Basin, eastern Australia	Duckworth CreekM L125	-23.5159	149.218	Locality		Sydney Basin	Australia	250	101.176	-55.666	Australia	Arcadia Formation, Rewan Group		F.33261	middle lower Triassic (Nammalian)		Olenekian	40-50°S	2	1	warm_temperate		calculated	warm_temperate
3009	1917	607	729	Cantrill & Webb	1998		Pleurocaulis	rewanense		Cantrill et Webb, 1998						Pleurocaulis	rewanense		Cantrill et Webb, 1998	Pleuromeiaceae	Pleuromeiales	Lycophyta	Pleuromeiales	Australia	Queensland	The Crater	-17.425	145.487	Locality	Mount Hypipamee Crater	Hodgkinson-Broken Ridge	Australia	250	95.569	-49.52	Australia	Arcadia Formation, Rewan Group		F.33275	middle lower Triassic (Nammalian)		Olenekian	30-40°N	4	0.416667		warm_temperate	manual	warm_temperate
3010	895	607	722	Cantrill & Webb	1998		Pleuromeia	reniformis		Cantrill et Webb, 1998						Pleuromeia	reniformis		Cantrill et Webb, 1998	Pleuromeiaceae	Pleuromeiales	Lycophyta	Pleuromeiales	Australia	Queensland	The Crater, L78	-17.425	145.487	Locality	Mount Hypipamee Crater	Hodgkinson-Broken Ridge	Australia	250	95.569	-49.52	Australia	Arcadia Formation, Rewan Group		F.33259	middle lower Triassic (Nammalian)		Olenekian	30-40°N	4	0.416667		warm_temperate	manual	warm_temperate
3045	1285	359	744	Cassinis & Perotti	2007		Dolomitia		sp.				Visscher et al., 2001			Dolomitia		sp.		Majonicaceae	Voltziales	Coniferophyta	Voltziales	Italy	Dolomites	Bletterbach	46.3612	11.4169	Locality	Bletterbach	Carnic Alps - South Karawanken	Western Europe - Alps	250	-1.32	12.144	Europe	Val Gardena Sandstone			Wuchiapingian		Wuchiapingian	20-30°N	94	1	subtropical_desert		calculated	subtropical_desert
3047	1285	359	744	Cassinis & Perotti	2007		Peltaspermum	martinsii					Visscher et al., 2001			Germaropteris	martinsii		(Germar in Kurtze, 1839) Kustatscher et al., 2014	Peltaspermaceae	Peltaspermales	Pteridospermatophyta	Peltaspermales	Italy	Dolomites	Bletterbach	46.3612	11.4169	Locality	Bletterbach	Carnic Alps - South Karawanken	Western Europe - Alps	250	-1.32	12.144	Europe	Val Gardena Sandstone			Wuchiapingian		Wuchiapingian	20-30°N	94	1	subtropical_desert		calculated	subtropical_desert
3052	1285	359	744	Cassinis & Perotti	2007		Majonica		sp.				Visscher et al., 2001			Majonica		sp.		Majonicaceae	Voltziales	Coniferophyta	Voltziales	Italy	Dolomites	Bletterbach	46.3612	11.4169	Locality	Bletterbach	Carnic Alps - South Karawanken	Western Europe - Alps	250	-1.32	12.144	Europe	Val Gardena Sandstone			Wuchiapingian		Wuchiapingian	20-30°N	94	1	subtropical_desert		calculated	subtropical_desert
3053	1285	359	744	Cassinis & Perotti	2007		Ortiseia	jonkeri					Visscher et al., 2001			Ortiseia	jonkeri			Utrechtiaceae	Voltziales	Coniferophyta	Voltziales	Italy	Dolomites	Bletterbach	46.3612	11.4169	Locality	Bletterbach	Carnic Alps - South Karawanken	Western Europe - Alps	250	-1.32	12.144	Europe	Val Gardena Sandstone			Wuchiapingian		Wuchiapingian	20-30°N	94	1	subtropical_desert		calculated	subtropical_desert
3054	1285	359	744	Cassinis & Perotti	2007		Ortiseia	leonardii					Visscher et al., 2001			Ortiseia	leonardii		Florin, 1964	Utrechtiaceae	Voltziales	Coniferophyta	Voltziales	Italy	Dolomites	Bletterbach	46.3612	11.4169	Locality	Bletterbach	Carnic Alps - South Karawanken	Western Europe - Alps	250	-1.32	12.144	Europe	Val Gardena Sandstone			Wuchiapingian		Wuchiapingian	20-30°N	94	1	subtropical_desert		calculated	subtropical_desert
3055	1285	359	744	Cassinis & Perotti	2007		Ortiseia	visscheri					Visscher et al., 2001			Ortiseia	visscheri		Clement-Westerhof, 1984	Utrechtiaceae	Voltziales	Coniferophyta	Voltziales	Italy	Dolomites	Bletterbach	46.3612	11.4169	Locality	Bletterbach	Carnic Alps - South Karawanken	Western Europe - Alps	250	-1.32	12.144	Europe	Val Gardena Sandstone			Wuchiapingian		Wuchiapingian	20-30°N	94	1	subtropical_desert		calculated	subtropical_desert
3058	1285	359	744	Cassinis & Perotti	2007		Pseudovoltzia		sp.				Visscher et al., 2001			Pseudovoltzia		sp.		Majonicaceae	Voltziales	Coniferophyta	Voltziales	Italy	Dolomites	Bletterbach	46.3612	11.4169	Locality	Bletterbach	Carnic Alps - South Karawanken	Western Europe - Alps	250	-1.32	12.144	Europe	Val Gardena Sandstone			Wuchiapingian		Wuchiapingian	20-30°N	94	1	subtropical_desert		calculated	subtropical_desert
3105	313	843	754	Catullo	1847		Voltzia	brevifolia			pl. 2, fig. 6a					Voltzia	heterophylla		Brongniart, 1828	Voltziaceae	Voltziales	Coniferophyta	Voltziales	Italy	Vicenza	Recoaro	45.7057	11.2246	Locality	Recoaro	Adria	Apulia	240	-9.64	11.607	Europe	Recoaro Sandstone			Anisian		Anisian	20-30°N	30	1	tropical_summerwet		calculated	tropical_summerwet
3106	313	843	754	Catullo	1847		Voltzia	elegans			pl. 2, fig. 6b					Voltzia	heterophylla		Brongniart, 1828	Voltziaceae	Voltziales	Coniferophyta	Voltziales	Italy	Vicenza	Recoaro	45.7057	11.2246	Locality	Recoaro	Adria	Apulia	240	-9.64	11.607	Europe	Recoaro Sandstone			Anisian		Anisian	20-30°N	30	1	tropical_summerwet		calculated	tropical_summerwet
3383	708	277	783	Charrier	1964		Baiera		sp.	Braun						Baiera		sp.		incertae sedis	Ginkgoales	Ginkgophyta	Ginkgoales	Italy	Bozen/Bolzano	Cuecenes	46.5865	11.7133	Locality		Carnic Alps - South Karawanken	Western Europe - Alps	250	-1.121	12.378	Europe	Gröden/Val Gardena Sandstone			Wuchiapingian		Wuchiapingian	20-30°N	94	1	subtropical_desert		calculated	subtropical_desert
3384	708	277	783	Charrier	1964		Cordaicarpus		sp.	Geinitz 1869						Carpolithes		sp.		incertae sedis	incertae sedis	Gymnospermae	Gymnospermae incertae sedis	Italy	Bozen/Bolzano	Cuecenes	46.5865	11.7133	Locality		Carnic Alps - South Karawanken	Western Europe - Alps	250	-1.121	12.378	Europe	Gröden/Val Gardena Sandstone			Wuchiapingian		Wuchiapingian	20-30°N	94	1	subtropical_desert		calculated	subtropical_desert
3385	708	277	783	Charrier	1964		Dadoxylon	atesinum		Charrier 1964						Dadoxylon	atesinum		Charrier, 1964	Araucariaceae	Coniferales	Coniferophyta	Coniferales	Italy	Bozen/Bolzano	Cuecenes	46.5865	11.7133	Locality		Carnic Alps - South Karawanken	Western Europe - Alps	250	-1.121	12.378	Europe	Gröden/Val Gardena Sandstone			Wuchiapingian		Wuchiapingian	20-30°N	94	1	subtropical_desert		calculated	subtropical_desert
3386	708	277	783	Charrier	1964		Plagiozamites		sp.	Zeiller						Plagiozamites		sp.		incertae sedis	Cycadales	Cycadophyta	Cycadales	Italy	Bozen/Bolzano	Cuecenes	46.5865	11.7133	Locality		Carnic Alps - South Karawanken	Western Europe - Alps	250	-1.121	12.378	Europe	Gröden/Val Gardena Sandstone			Wuchiapingian		Wuchiapingian	20-30°N	94	1	subtropical_desert		calculated	subtropical_desert
3387	708	277	783	Charrier	1964		Poacordaites		sp.	Grand'Eury						Poacordaites		sp.		incertae sedis	Cordaitales	Gymnospermae	Cordaitales	Italy	Bozen/Bolzano	Cuecenes	46.5865	11.7133	Locality		Carnic Alps - South Karawanken	Western Europe - Alps	250	-1.121	12.378	Europe	Gröden/Val Gardena Sandstone			Wuchiapingian		Wuchiapingian	20-30°N	94	1	subtropical_desert		calculated	subtropical_desert
3389	148	570	785	Chroustchoff	1868		Lepidodendron	keuperianum		Chroustchoff	Pl. 7, Fig. 1				?	Lepidodendron	keuperianum		Chroustchoff	Lepidodendraceae	Lepidodendrales	Lycophyta	Lepidodendrales	Germany	Baden-Württemberg	Stuttgart, Feuerbacher Heide	48.7901	9.15481	Locality	Feuerbacher Heide	Moldanubian	Anglo-Saxonia	240	-4.801	20.452	Europe	Schilfsandstein	weißer Keupersandstein, Keuper ?, oft zwischen bunt eingefärbten Mergel		late Ladinian		Ladinian	30-40°N	575	1	tropical_summerwet		calculated	tropical_summerwet
3390	1724	570	786	Chroustchoff	1868		Lepidodendron	keuperinum			Pl. 7, Fig. 1				?	Lepidodendron	keuperianum		Chroustchoff	Lepidodendraceae	Lepidodendrales	Lycophyta	Lepidodendrales	Germany		Feuerbacher Heide	48.7901	9.15481	Locality	Feuerbacher Heide, Stuttgart	Moldanubian	Anglo-Saxonia	240	-4.801	20.452	Europe	Schilfsandstein	weißer Keupersandstein, Keuper d, oft zwischen bunt eingefärbten Mergel		late Ladinian		Ladinian	30-40°N	575	1	tropical_summerwet		calculated	tropical_summerwet
3392	249	51	788	Chu et al.	2016		Gigantonoclea	guizhouensis								Abrotopteris	guizhouensis		(Gu et Zhi, 1974) Mo, 1980	incertae sedis	incertae sedis	Pteridophylla	Glossopteridales	China	Guizhou Province	Xiaohebian section, near Xiaohebian Village, Halahe Town	26.8233	103.997	City	Halahexiang	South China	China	250	89.479	20.447	South China	Kayitou Formation		7	Changhsingian		Changhsingian	30-40°N	28	0.477381	tropical_everwet	tropical_everwet	calculated	tropical_everwet
3393	249	51	789	Chu et al.	2016		Gigantonoclea	guizhouensis								Abrotopteris	guizhouensis		(Gu et Zhi, 1974) Mo, 1980	incertae sedis	incertae sedis	Pteridophylla	Glossopteridales	China	Guizhou Province	Xiaohebian section, near Xiaohebian Village, Halahe Town	26.8233	103.997	City	Halahexiang	South China	China	250	89.479	20.447	South China	Xuanwei		3	Changhsingian		Changhsingian	30-40°N	28	0.477381	tropical_everwet	tropical_everwet	calculated	tropical_everwet
3394	254	55	790	Chu et al.	2016		Gigantonoclea	guizhouensis						Zhang et al. 2016		Abrotopteris	guizhouensis		(Gu et Zhi, 1974) Mo, 1980	incertae sedis	incertae sedis	Pteridophylla	Glossopteridales	China	Leju County, Yunnan Province	Guanbachong section, Zhaotong City	24.4753	101.343	Region	Yunnan Province	South China	China	250	88.523	17.22	South China	Kayitou Formation			Changhsingian		Changhsingian	20-30°N	61	1	tropical_everwet		calculated	tropical_everwet
3395	254	55	791	Chu et al.	2016		Gigantonoclea	guizhouensis						Zhang et al. 2016		Abrotopteris	guizhouensis		(Gu et Zhi, 1974) Mo, 1980	incertae sedis	incertae sedis	Pteridophylla	Glossopteridales	China	Leju County, Yunnan Province	Guanbachong section, Zhaotong City	24.4753	101.343	Region	Yunnan Province	South China	China	250	88.523	17.22	South China	Xuanwei Formation			Changhsingian		Changhsingian	20-30°N	61	1	tropical_everwet		calculated	tropical_everwet
3396	255	133	792	Chu et al.	2016		Gigantonoclea	guizhouensis								Abrotopteris	guizhouensis		(Gu et Zhi, 1974) Mo, 1980	incertae sedis	incertae sedis	Pteridophylla	Glossopteridales	China	Panxian County, Guizhou Province	Wadu section, near Wadu village	25.71	104.472	Area	Panzhou	South China	China	250	90.468	19.7	South China	Xuanwei Formation		15	Changhsingian		Changhsingian	20-30°N	170	0.543824	tropical_everwet	tropical_everwet	calculated	tropical_everwet
3397	255	133	792	Chu et al.	2016		Gigantonoclea	guizhouensis								Abrotopteris	guizhouensis		(Gu et Zhi, 1974) Mo, 1980	incertae sedis	incertae sedis	Pteridophylla	Glossopteridales	China	Panxian County, Guizhou Province	Wadu section, near Wadu village	25.71	104.472	Area	Panzhou	South China	China	250	90.468	19.7	South China	Xuanwei Formation		14	Changhsingian		Changhsingian	20-30°N	170	0.543824	tropical_everwet	tropical_everwet	calculated	tropical_everwet
3398	255	133	792	Chu et al.	2016		Gigantonoclea	guizhouensis								Abrotopteris	guizhouensis		(Gu et Zhi, 1974) Mo, 1980	incertae sedis	incertae sedis	Pteridophylla	Glossopteridales	China	Panxian County, Guizhou Province	Wadu section, near Wadu village	25.71	104.472	Area	Panzhou	South China	China	250	90.468	19.7	South China	Xuanwei Formation		11	Changhsingian		Changhsingian	20-30°N	170	0.543824	tropical_everwet	tropical_everwet	calculated	tropical_everwet
3399	257	158	793	Chu et al.	2016		Gigantonoclea	guizhouensis								Abrotopteris	guizhouensis		(Gu et Zhi, 1974) Mo, 1980	incertae sedis	incertae sedis	Pteridophylla	Glossopteridales	China	Weining County, Guizhou Province	Chahe section, near Chahe Town	27.1688	105.379	Locality	Chahezhen	South China	China	250	90.428	21.37	South China	Xuanwei Formation		28 – 29	Changhsingian		Changhsingian	30-40°N	401	1	tropical_everwet		calculated	tropical_everwet
3400	257	158	793	Chu et al.	2016		Gigantonoclea	guizhouensis								Abrotopteris	guizhouensis		(Gu et Zhi, 1974) Mo, 1980	incertae sedis	incertae sedis	Pteridophylla	Glossopteridales	China	Weining County, Guizhou Province	Chahe section, near Chahe Town	27.1688	105.379	Locality	Chahezhen	South China	China	250	90.428	21.37	South China	Xuanwei Formation		23	Changhsingian		Changhsingian	30-40°N	401	1	tropical_everwet		calculated	tropical_everwet
3401	257	158	793	Chu et al.	2016		Gigantonoclea	guizhouensis								Abrotopteris	guizhouensis		(Gu et Zhi, 1974) Mo, 1980	incertae sedis	incertae sedis	Pteridophylla	Glossopteridales	China	Weining County, Guizhou Province	Chahe section, near Chahe Town	27.1688	105.379	Locality	Chahezhen	South China	China	250	90.428	21.37	South China	Xuanwei Formation		18 – 20	Changhsingian		Changhsingian	30-40°N	401	1	tropical_everwet		calculated	tropical_everwet
3402	257	158	793	Chu et al.	2016		Gigantonoclea	guizhouensis								Abrotopteris	guizhouensis		(Gu et Zhi, 1974) Mo, 1980	incertae sedis	incertae sedis	Pteridophylla	Glossopteridales	China	Weining County, Guizhou Province	Chahe section, near Chahe Town	27.1688	105.379	Locality	Chahezhen	South China	China	250	90.428	21.37	South China	Xuanwei Formation		14 – 17	Changhsingian		Changhsingian	30-40°N	401	1	tropical_everwet		calculated	tropical_everwet
3403	255	133	792	Chu et al.	2016		Alethopteris		sp.							Alethopteris		sp.		incertae sedis	Medullosales	Pteridospermatophyta	Medullosales	China	Panxian County, Guizhou Province	Wadu section, near Wadu village	25.71	104.472	Area	Panzhou	South China	China	250	90.468	19.7	South China	Xuanwei Formation		14	Changhsingian		Changhsingian	20-30°N	170	0.543824	tropical_everwet	tropical_everwet	calculated	tropical_everwet
3405	376	135	795	Chu et al.	2016		Annalepis		sp.							Lepacyclotes		sp.		Pleuromeiaceae	Pleuromeiales	Lycophyta	Pleuromeiales	China	Guizhou Province	Jinzhong section, 15 km south of Jinzhong Town	27.6193	105.344	Locality	Jinzhong	South China	China	250	90.153	21.741	South China	Kayitou Formation		12	Induan		Induan	30-40°N	27	0.425926	tropical_summerwet	tropical_summerwet	calculated	tropical_summerwet
3406	376	135	795	Chu et al.	2016		Annalepis		sp.							Lepacyclotes		sp.		Pleuromeiaceae	Pleuromeiales	Lycophyta	Pleuromeiales	China	Guizhou Province	Jinzhong section, 15 km south of Jinzhong Town	27.6193	105.344	Locality	Jinzhong	South China	China	250	90.153	21.741	South China	Kayitou Formation		11	Induan		Induan	30-40°N	27	0.425926	tropical_summerwet	tropical_summerwet	calculated	tropical_summerwet
3407	376	135	795	Chu et al.	2016		Annalepis		sp.							Lepacyclotes		sp.		Pleuromeiaceae	Pleuromeiales	Lycophyta	Pleuromeiales	China	Guizhou Province	Jinzhong section, 15 km south of Jinzhong Town	27.6193	105.344	Locality	Jinzhong	South China	China	250	90.153	21.741	South China	Kayitou Formation		10	Induan		Induan	30-40°N	27	0.425926	tropical_summerwet	tropical_summerwet	calculated	tropical_summerwet
3410	257	158	793	Chu et al.	2016		Annularia	pingloensis								Annularia	pingloensis		(Sze, 1940) Gu et Zhi, 1974	Calamitaceae	Equisetales	Sphenophyta	Equisetales	China	Weining County, Guizhou Province	Chahe section, near Chahe Town	27.1688	105.379	Locality	Chahezhen	South China	China	250	90.428	21.37	South China	Xuanwei Formation		14 – 17	Changhsingian		Changhsingian	30-40°N	401	1	tropical_everwet		calculated	tropical_everwet
3411	255	133	792	Chu et al.	2016		Annularia	shirakii								Annularia	shirakii		Kawasaki, 1927	Calamitaceae	Equisetales	Sphenophyta	Equisetales	China	Panxian County, Guizhou Province	Wadu section, near Wadu village	25.71	104.472	Area	Panzhou	South China	China	250	90.468	19.7	South China	Xuanwei Formation		16	Changhsingian		Changhsingian	20-30°N	170	0.543824	tropical_everwet	tropical_everwet	calculated	tropical_everwet
3412	255	133	792	Chu et al.	2016		Annularia	shirakii								Annularia	shirakii		Kawasaki, 1927	Calamitaceae	Equisetales	Sphenophyta	Equisetales	China	Panxian County, Guizhou Province	Wadu section, near Wadu village	25.71	104.472	Area	Panzhou	South China	China	250	90.468	19.7	South China	Xuanwei Formation		15	Changhsingian		Changhsingian	20-30°N	170	0.543824	tropical_everwet	tropical_everwet	calculated	tropical_everwet
3413	255	133	792	Chu et al.	2016		Annularia	shirakii								Annularia	shirakii		Kawasaki, 1927	Calamitaceae	Equisetales	Sphenophyta	Equisetales	China	Panxian County, Guizhou Province	Wadu section, near Wadu village	25.71	104.472	Area	Panzhou	South China	China	250	90.468	19.7	South China	Xuanwei Formation		14	Changhsingian		Changhsingian	20-30°N	170	0.543824	tropical_everwet	tropical_everwet	calculated	tropical_everwet
3414	386	124	797	Chu et al.	2016		Annlaria		sp.							Annularia		sp.		Calamitaceae	Equisetales	Sphenophyta	Equisetales	China	Junlian County, Sichuan Province	Jinjibang section, near Jinji village, approx. 5 km southwest of Zhenzhou town	28.1639	104.511	Area	Junlian	South China	China	250	89.171	21.834	South China	Xuanwei Formation		8	Changhsingian		Changhsingian	30-40°N	220	1	tropical_everwet		calculated	tropical_everwet
3415	386	124	797	Chu et al.	2016		Annlaria		sp.							Annularia		sp.		Calamitaceae	Equisetales	Sphenophyta	Equisetales	China	Junlian County, Sichuan Province	Jinjibang section, near Jinji village, approx. 5 km southwest of Zhenzhou town	28.1639	104.511	Area	Junlian	South China	China	250	89.171	21.834	South China	Xuanwei Formation		6	Changhsingian		Changhsingian	30-40°N	220	1	tropical_everwet		calculated	tropical_everwet
3416	386	124	797	Chu et al.	2016		Annlaria		sp.							Annularia		sp.		Calamitaceae	Equisetales	Sphenophyta	Equisetales	China	Junlian County, Sichuan Province	Jinjibang section, near Jinji village, approx. 5 km southwest of Zhenzhou town	28.1639	104.511	Area	Junlian	South China	China	250	89.171	21.834	South China	Xuanwei Formation		5	Changhsingian		Changhsingian	30-40°N	220	1	tropical_everwet		calculated	tropical_everwet
3417	249	51	788	Chu et al.	2016		Pecopteris	guizhouensis								Asterotheca	guizhouensis		Chang ex Zhang, 1978	Asterothecaceae	Marattiales	Pteridophyta	Marattiales	China	Guizhou Province	Xiaohebian section, near Xiaohebian Village, Halahe Town	26.8233	103.997	City	Halahexiang	South China	China	250	89.479	20.447	South China	Kayitou Formation		7	Changhsingian		Changhsingian	30-40°N	28	0.477381	tropical_everwet	tropical_everwet	calculated	tropical_everwet
3419	249	51	789	Chu et al.	2016		Pecopteris	guizhouensis								Asterotheca	guizhouensis		Chang ex Zhang, 1978	Asterothecaceae	Marattiales	Pteridophyta	Marattiales	China	Guizhou Province	Xiaohebian section, near Xiaohebian Village, Halahe Town	26.8233	103.997	City	Halahexiang	South China	China	250	89.479	20.447	South China	Xuanwei		3	Changhsingian		Changhsingian	30-40°N	28	0.477381	tropical_everwet	tropical_everwet	calculated	tropical_everwet
3420	249	51	789	Chu et al.	2016		Pecopteris	guizhouensis								Asterotheca	guizhouensis		Chang ex Zhang, 1978	Asterothecaceae	Marattiales	Pteridophyta	Marattiales	China	Guizhou Province	Xiaohebian section, near Xiaohebian Village, Halahe Town	26.8233	103.997	City	Halahexiang	South China	China	250	89.479	20.447	South China	Xuanwei		2	Changhsingian		Changhsingian	30-40°N	28	0.477381	tropical_everwet	tropical_everwet	calculated	tropical_everwet
3421	249	51	789	Chu et al.	2016		Pecopteris	guizhouensis								Asterotheca	guizhouensis		Chang ex Zhang, 1978	Asterothecaceae	Marattiales	Pteridophyta	Marattiales	China	Guizhou Province	Xiaohebian section, near Xiaohebian Village, Halahe Town	26.8233	103.997	City	Halahexiang	South China	China	250	89.479	20.447	South China	Xuanwei		1	Changhsingian		Changhsingian	30-40°N	28	0.477381	tropical_everwet	tropical_everwet	calculated	tropical_everwet
3422	376	136	799	Chu et al.	2016		Pecopteris	guizhouensis								Asterotheca	guizhouensis		Chang ex Zhang, 1978	Asterothecaceae	Marattiales	Pteridophyta	Marattiales	China	Guizhou Province	Jinzhong section, 15 km south of Jinzhong Town	27.6193	105.344	Locality	Jinzhong	South China	China	250	90.153	21.741	South China	Xuanwei Formation		5	Changhsingian		Changhsingian	30-40°N	399	1	tropical_everwet		calculated	tropical_everwet
3423	255	133	792	Chu et al.	2016		Pecopteris	guizhouensis								Asterotheca	guizhouensis		Chang ex Zhang, 1978	Asterothecaceae	Marattiales	Pteridophyta	Marattiales	China	Panxian County, Guizhou Province	Wadu section, near Wadu village	25.71	104.472	Area	Panzhou	South China	China	250	90.468	19.7	South China	Xuanwei Formation		8	Changhsingian		Changhsingian	20-30°N	170	0.543824	tropical_everwet	tropical_everwet	calculated	tropical_everwet
3424	257	158	793	Chu et al.	2016		Pecopteris	guizhouensis								Asterotheca	guizhouensis		Chang ex Zhang, 1978	Asterothecaceae	Marattiales	Pteridophyta	Marattiales	China	Weining County, Guizhou Province	Chahe section, near Chahe Town	27.1688	105.379	Locality	Chahezhen	South China	China	250	90.428	21.37	South China	Xuanwei Formation		60	Changhsingian		Changhsingian	30-40°N	401	1	tropical_everwet		calculated	tropical_everwet
3425	254	55	790	Chu et al.	2016		Pecopteris	guizhouensis	cf.					Zhang et al. 2016		Asterotheca	guizhouensis	cf.	Chang ex Zhang, 1978	Asterothecaceae	Marattiales	Pteridophyta	Marattiales	China	Leju County, Yunnan Province	Guanbachong section, Zhaotong City	24.4753	101.343	Region	Yunnan Province	South China	China	250	88.523	17.22	South China	Kayitou Formation			Changhsingian		Changhsingian	20-30°N	61	1	tropical_everwet		calculated	tropical_everwet
3426	386	124	797	Chu et al.	2016		Asterotheca		sp.							Asterotheca		sp.		Asterothecaceae	Marattiales	Pteridophyta	Marattiales	China	Junlian County, Sichuan Province	Jinjibang section, near Jinji village, approx. 5 km southwest of Zhenzhou town	28.1639	104.511	Area	Junlian	South China	China	250	89.171	21.834	South China	Xuanwei Formation		17	Changhsingian		Changhsingian	30-40°N	220	1	tropical_everwet		calculated	tropical_everwet
3427	386	124	797	Chu et al.	2016		Asterotheca		sp.							Asterotheca		sp.		Asterothecaceae	Marattiales	Pteridophyta	Marattiales	China	Junlian County, Sichuan Province	Jinjibang section, near Jinji village, approx. 5 km southwest of Zhenzhou town	28.1639	104.511	Area	Junlian	South China	China	250	89.171	21.834	South China	Xuanwei Formation		8	Changhsingian		Changhsingian	30-40°N	220	1	tropical_everwet		calculated	tropical_everwet
3428	386	124	797	Chu et al.	2016		Asterotheca		sp.							Asterotheca		sp.		Asterothecaceae	Marattiales	Pteridophyta	Marattiales	China	Junlian County, Sichuan Province	Jinjibang section, near Jinji village, approx. 5 km southwest of Zhenzhou town	28.1639	104.511	Area	Junlian	South China	China	250	89.171	21.834	South China	Xuanwei Formation		6	Changhsingian		Changhsingian	30-40°N	220	1	tropical_everwet		calculated	tropical_everwet
3429	386	124	797	Chu et al.	2016		Asterotheca		sp.							Asterotheca		sp.		Asterothecaceae	Marattiales	Pteridophyta	Marattiales	China	Junlian County, Sichuan Province	Jinjibang section, near Jinji village, approx. 5 km southwest of Zhenzhou town	28.1639	104.511	Area	Junlian	South China	China	250	89.171	21.834	South China	Xuanwei Formation		5	Changhsingian		Changhsingian	30-40°N	220	1	tropical_everwet		calculated	tropical_everwet
3430	386	124	797	Chu et al.	2016		Asterotheca		sp.							Asterotheca		sp.		Asterothecaceae	Marattiales	Pteridophyta	Marattiales	China	Junlian County, Sichuan Province	Jinjibang section, near Jinji village, approx. 5 km southwest of Zhenzhou town	28.1639	104.511	Area	Junlian	South China	China	250	89.171	21.834	South China	Xuanwei Formation		4	Changhsingian		Changhsingian	30-40°N	220	1	tropical_everwet		calculated	tropical_everwet
3431	386	124	797	Chu et al.	2016		Asterotheca		sp.							Asterotheca		sp.		Asterothecaceae	Marattiales	Pteridophyta	Marattiales	China	Junlian County, Sichuan Province	Jinjibang section, near Jinji village, approx. 5 km southwest of Zhenzhou town	28.1639	104.511	Area	Junlian	South China	China	250	89.171	21.834	South China	Xuanwei Formation		3	Changhsingian		Changhsingian	30-40°N	220	1	tropical_everwet		calculated	tropical_everwet
3432	386	124	797	Chu et al.	2016		Bothrodendron		sp.							Bothrodendron		sp.		incertae sedis	Lepidodendrales	Lycophyta	Lepidodendrales	China	Junlian County, Sichuan Province	Jinjibang section, near Jinji village, approx. 5 km southwest of Zhenzhou town	28.1639	104.511	Area	Junlian	South China	China	250	89.171	21.834	South China	Xuanwei Formation		6	Changhsingian		Changhsingian	30-40°N	220	1	tropical_everwet		calculated	tropical_everwet
3433	386	124	797	Chu et al.	2016		Bothrodendron		sp.							Bothrodendron		sp.		incertae sedis	Lepidodendrales	Lycophyta	Lepidodendrales	China	Junlian County, Sichuan Province	Jinjibang section, near Jinji village, approx. 5 km southwest of Zhenzhou town	28.1639	104.511	Area	Junlian	South China	China	250	89.171	21.834	South China	Xuanwei Formation		4	Changhsingian		Changhsingian	30-40°N	220	1	tropical_everwet		calculated	tropical_everwet
3434	386	124	797	Chu et al.	2016		Calamites		sp.							Calamites		sp.		Calamitaceae	Equisetales	Sphenophyta	Equisetales	China	Junlian County, Sichuan Province	Jinjibang section, near Jinji village, approx. 5 km southwest of Zhenzhou town	28.1639	104.511	Area	Junlian	South China	China	250	89.171	21.834	South China	Xuanwei Formation		19	Changhsingian		Changhsingian	30-40°N	220	1	tropical_everwet		calculated	tropical_everwet
3435	386	124	797	Chu et al.	2016		Calamites		sp.							Calamites		sp.		Calamitaceae	Equisetales	Sphenophyta	Equisetales	China	Junlian County, Sichuan Province	Jinjibang section, near Jinji village, approx. 5 km southwest of Zhenzhou town	28.1639	104.511	Area	Junlian	South China	China	250	89.171	21.834	South China	Xuanwei Formation		4	Changhsingian		Changhsingian	30-40°N	220	1	tropical_everwet		calculated	tropical_everwet
3436	386	124	797	Chu et al.	2016		Calamites		sp.							Calamites		sp.		Calamitaceae	Equisetales	Sphenophyta	Equisetales	China	Junlian County, Sichuan Province	Jinjibang section, near Jinji village, approx. 5 km southwest of Zhenzhou town	28.1639	104.511	Area	Junlian	South China	China	250	89.171	21.834	South China	Xuanwei Formation		3	Changhsingian		Changhsingian	30-40°N	220	1	tropical_everwet		calculated	tropical_everwet
3437	255	133	792	Chu et al.	2016		Calamites		sp.							Calamites		sp.		Calamitaceae	Equisetales	Sphenophyta	Equisetales	China	Panxian County, Guizhou Province	Wadu section, near Wadu village	25.71	104.472	Area	Panzhou	South China	China	250	90.468	19.7	South China	Xuanwei Formation		15	Changhsingian		Changhsingian	20-30°N	170	0.543824	tropical_everwet	tropical_everwet	calculated	tropical_everwet
3438	257	158	793	Chu et al.	2016		Calamites		sp.							Calamites		sp.		Calamitaceae	Equisetales	Sphenophyta	Equisetales	China	Weining County, Guizhou Province	Chahe section, near Chahe Town	27.1688	105.379	Locality	Chahezhen	South China	China	250	90.428	21.37	South China	Xuanwei Formation		60	Changhsingian		Changhsingian	30-40°N	401	1	tropical_everwet		calculated	tropical_everwet
3440	386	124	797	Chu et al.	2016		Carpolithus		sp.							Carpolithes		sp.		incertae sedis	incertae sedis	Gymnospermae	Gymnospermae incertae sedis	China	Junlian County, Sichuan Province	Jinjibang section, near Jinji village, approx. 5 km southwest of Zhenzhou town	28.1639	104.511	Area	Junlian	South China	China	250	89.171	21.834	South China	Xuanwei Formation		18	Changhsingian		Changhsingian	30-40°N	220	1	tropical_everwet		calculated	tropical_everwet
3441	386	124	797	Chu et al.	2016		Carpolithus		sp.							Carpolithes		sp.		incertae sedis	incertae sedis	Gymnospermae	Gymnospermae incertae sedis	China	Junlian County, Sichuan Province	Jinjibang section, near Jinji village, approx. 5 km southwest of Zhenzhou town	28.1639	104.511	Area	Junlian	South China	China	250	89.171	21.834	South China	Xuanwei Formation		13	Changhsingian		Changhsingian	30-40°N	220	1	tropical_everwet		calculated	tropical_everwet
3442	386	124	797	Chu et al.	2016		Carpolithus		sp.							Carpolithes		sp.		incertae sedis	incertae sedis	Gymnospermae	Gymnospermae incertae sedis	China	Junlian County, Sichuan Province	Jinjibang section, near Jinji village, approx. 5 km southwest of Zhenzhou town	28.1639	104.511	Area	Junlian	South China	China	250	89.171	21.834	South China	Xuanwei Formation		8	Changhsingian		Changhsingian	30-40°N	220	1	tropical_everwet		calculated	tropical_everwet
3443	386	124	797	Chu et al.	2016		Carpolithus		sp.							Carpolithes		sp.		incertae sedis	incertae sedis	Gymnospermae	Gymnospermae incertae sedis	China	Junlian County, Sichuan Province	Jinjibang section, near Jinji village, approx. 5 km southwest of Zhenzhou town	28.1639	104.511	Area	Junlian	South China	China	250	89.171	21.834	South China	Xuanwei Formation		7	Changhsingian		Changhsingian	30-40°N	220	1	tropical_everwet		calculated	tropical_everwet
3444	386	124	797	Chu et al.	2016		Carpolithus		sp.							Carpolithes		sp.		incertae sedis	incertae sedis	Gymnospermae	Gymnospermae incertae sedis	China	Junlian County, Sichuan Province	Jinjibang section, near Jinji village, approx. 5 km southwest of Zhenzhou town	28.1639	104.511	Area	Junlian	South China	China	250	89.171	21.834	South China	Xuanwei Formation		5	Changhsingian		Changhsingian	30-40°N	220	1	tropical_everwet		calculated	tropical_everwet
3445	254	55	790	Chu et al.	2016		Carpolithus		sp.				Zhang et al. 2016			Carpolithes		sp.		incertae sedis	incertae sedis	Gymnospermae	Gymnospermae incertae sedis	China	Leju County, Yunnan Province	Guanbachong section, Zhaotong City	24.4753	101.343	Region	Yunnan Province	South China	China	250	88.523	17.22	South China	Kayitou Formation			Changhsingian		Changhsingian	20-30°N	61	1	tropical_everwet		calculated	tropical_everwet
3446	255	133	792	Chu et al.	2016		Carpolithus		sp.							Carpolithes		sp.		incertae sedis	incertae sedis	Gymnospermae	Gymnospermae incertae sedis	China	Panxian County, Guizhou Province	Wadu section, near Wadu village	25.71	104.472	Area	Panzhou	South China	China	250	90.468	19.7	South China	Xuanwei Formation		8	Changhsingian		Changhsingian	20-30°N	170	0.543824	tropical_everwet	tropical_everwet	calculated	tropical_everwet
3447	255	133	792	Chu et al.	2016		Carpolithus		sp.							Carpolithes		sp.		incertae sedis	incertae sedis	Gymnospermae	Gymnospermae incertae sedis	China	Panxian County, Guizhou Province	Wadu section, near Wadu village	25.71	104.472	Area	Panzhou	South China	China	250	90.468	19.7	South China	Xuanwei Formation		3	Changhsingian		Changhsingian	20-30°N	170	0.543824	tropical_everwet	tropical_everwet	calculated	tropical_everwet
3448	255	133	792	Chu et al.	2016		Carpolithus		sp.							Carpolithes		sp.		incertae sedis	incertae sedis	Gymnospermae	Gymnospermae incertae sedis	China	Panxian County, Guizhou Province	Wadu section, near Wadu village	25.71	104.472	Area	Panzhou	South China	China	250	90.468	19.7	South China	Xuanwei Formation		2	Changhsingian		Changhsingian	20-30°N	170	0.543824	tropical_everwet	tropical_everwet	calculated	tropical_everwet
3449	257	158	793	Chu et al.	2016		Cladophlebis	fuyuanensisi								Cladophlebis	fuyuanensis		Zhang, 1980	Osmundaceae	Osmundales	Pteridophyta	Osmundales	China	Weining County, Guizhou Province	Chahe section, near Chahe Town	27.1688	105.379	Locality	Chahezhen	South China	China	250	90.428	21.37	South China	Xuanwei Formation		6 – 7	Changhsingian		Changhsingian	30-40°N	401	1	tropical_everwet		calculated	tropical_everwet
3450	257	158	793	Chu et al.	2016		Cladophlebis	fuyuanensisi								Cladophlebis	fuyuanensis		Zhang, 1980	Osmundaceae	Osmundales	Pteridophyta	Osmundales	China	Weining County, Guizhou Province	Chahe section, near Chahe Town	27.1688	105.379	Locality	Chahezhen	South China	China	250	90.428	21.37	South China	Xuanwei Formation		4	Changhsingian		Changhsingian	30-40°N	401	1	tropical_everwet		calculated	tropical_everwet
3451	254	55	790	Chu et al.	2016		Cladophlebis	parapermica					Zhang et al. 2016			Cladophlebis	parapermica		Chan ex Zhang, 1978	Osmundaceae	Osmundales	Pteridophyta	Osmundales	China	Leju County, Yunnan Province	Guanbachong section, Zhaotong City	24.4753	101.343	Region	Yunnan Province	South China	China	250	88.523	17.22	South China	Kayitou Formation			Changhsingian		Changhsingian	20-30°N	61	1	tropical_everwet		calculated	tropical_everwet
3452	386	124	797	Chu et al.	2016		Cladophlebis	permica								Cladophlebis	permica		Lee et Wang	Osmundaceae	Osmundales	Pteridophyta	Osmundales	China	Junlian County, Sichuan Province	Jinjibang section, near Jinji village, approx. 5 km southwest of Zhenzhou town	28.1639	104.511	Area	Junlian	South China	China	250	89.171	21.834	South China	Xuanwei Formation		13	Changhsingian		Changhsingian	30-40°N	220	1	tropical_everwet		calculated	tropical_everwet
3453	386	124	797	Chu et al.	2016		Cladophlebis	permica								Cladophlebis	permica		Lee et Wang	Osmundaceae	Osmundales	Pteridophyta	Osmundales	China	Junlian County, Sichuan Province	Jinjibang section, near Jinji village, approx. 5 km southwest of Zhenzhou town	28.1639	104.511	Area	Junlian	South China	China	250	89.171	21.834	South China	Xuanwei Formation		5	Changhsingian		Changhsingian	30-40°N	220	1	tropical_everwet		calculated	tropical_everwet
3454	386	124	797	Chu et al.	2016		Cladophlebis	permica								Cladophlebis	permica		Lee et Wang	Osmundaceae	Osmundales	Pteridophyta	Osmundales	China	Junlian County, Sichuan Province	Jinjibang section, near Jinji village, approx. 5 km southwest of Zhenzhou town	28.1639	104.511	Area	Junlian	South China	China	250	89.171	21.834	South China	Xuanwei Formation		4	Changhsingian		Changhsingian	30-40°N	220	1	tropical_everwet		calculated	tropical_everwet
3455	386	124	797	Chu et al.	2016		Cladophlebis	permica								Cladophlebis	permica		Lee et Wang	Osmundaceae	Osmundales	Pteridophyta	Osmundales	China	Junlian County, Sichuan Province	Jinjibang section, near Jinji village, approx. 5 km southwest of Zhenzhou town	28.1639	104.511	Area	Junlian	South China	China	250	89.171	21.834	South China	Xuanwei Formation		3	Changhsingian		Changhsingian	30-40°N	220	1	tropical_everwet		calculated	tropical_everwet
3456	257	158	793	Chu et al.	2016		Cladophlebis	permica								Cladophlebis	permica		Lee et Wang	Osmundaceae	Osmundales	Pteridophyta	Osmundales	China	Weining County, Guizhou Province	Chahe section, near Chahe Town	27.1688	105.379	Locality	Chahezhen	South China	China	250	90.428	21.37	South China	Xuanwei Formation		14 – 17	Changhsingian		Changhsingian	30-40°N	401	1	tropical_everwet		calculated	tropical_everwet
3457	386	124	797	Chu et al.	2016		Cladophlebis		sp.							Cladophlebis		sp.		Osmundaceae	Osmundales	Pteridophyta	Osmundales	China	Junlian County, Sichuan Province	Jinjibang section, near Jinji village, approx. 5 km southwest of Zhenzhou town	28.1639	104.511	Area	Junlian	South China	China	250	89.171	21.834	South China	Xuanwei Formation		21	Changhsingian		Changhsingian	30-40°N	220	1	tropical_everwet		calculated	tropical_everwet
3458	386	124	797	Chu et al.	2016		Cladophlebis		sp.							Cladophlebis		sp.		Osmundaceae	Osmundales	Pteridophyta	Osmundales	China	Junlian County, Sichuan Province	Jinjibang section, near Jinji village, approx. 5 km southwest of Zhenzhou town	28.1639	104.511	Area	Junlian	South China	China	250	89.171	21.834	South China	Xuanwei Formation		19	Changhsingian		Changhsingian	30-40°N	220	1	tropical_everwet		calculated	tropical_everwet
3459	386	124	797	Chu et al.	2016		Cladophlebis		sp.							Cladophlebis		sp.		Osmundaceae	Osmundales	Pteridophyta	Osmundales	China	Junlian County, Sichuan Province	Jinjibang section, near Jinji village, approx. 5 km southwest of Zhenzhou town	28.1639	104.511	Area	Junlian	South China	China	250	89.171	21.834	South China	Xuanwei Formation		9	Changhsingian		Changhsingian	30-40°N	220	1	tropical_everwet		calculated	tropical_everwet
3460	386	124	797	Chu et al.	2016		Cladophlebis		sp.							Cladophlebis		sp.		Osmundaceae	Osmundales	Pteridophyta	Osmundales	China	Junlian County, Sichuan Province	Jinjibang section, near Jinji village, approx. 5 km southwest of Zhenzhou town	28.1639	104.511	Area	Junlian	South China	China	250	89.171	21.834	South China	Xuanwei Formation		7	Changhsingian		Changhsingian	30-40°N	220	1	tropical_everwet		calculated	tropical_everwet
3461	386	124	797	Chu et al.	2016		Cladophlebis		sp.							Cladophlebis		sp.		Osmundaceae	Osmundales	Pteridophyta	Osmundales	China	Junlian County, Sichuan Province	Jinjibang section, near Jinji village, approx. 5 km southwest of Zhenzhou town	28.1639	104.511	Area	Junlian	South China	China	250	89.171	21.834	South China	Xuanwei Formation		2	Changhsingian		Changhsingian	30-40°N	220	1	tropical_everwet		calculated	tropical_everwet
3462	257	158	793	Chu et al.	2016		Cladophlebis		sp.							Cladophlebis		sp.		Osmundaceae	Osmundales	Pteridophyta	Osmundales	China	Weining County, Guizhou Province	Chahe section, near Chahe Town	27.1688	105.379	Locality	Chahezhen	South China	China	250	90.428	21.37	South China	Xuanwei Formation		14 – 17	Changhsingian		Changhsingian	30-40°N	401	1	tropical_everwet		calculated	tropical_everwet
3463	257	158	793	Chu et al.	2016		Cladophlebis		sp.							Cladophlebis		sp.		Osmundaceae	Osmundales	Pteridophyta	Osmundales	China	Weining County, Guizhou Province	Chahe section, near Chahe Town	27.1688	105.379	Locality	Chahezhen	South China	China	250	90.428	21.37	South China	Xuanwei Formation		2 – 3	Changhsingian		Changhsingian	30-40°N	401	1	tropical_everwet		calculated	tropical_everwet
3464	257	158	793	Chu et al.	2016		Pecopteris	tenuicostata								Cladophlebis	tenuicostata		(Halle, 1927) Archangelsky et Wagner	Osmundaceae	Osmundales	Pteridophyta	Osmundales	China	Weining County, Guizhou Province	Chahe section, near Chahe Town	27.1688	105.379	Locality	Chahezhen	South China	China	250	90.428	21.37	South China	Xuanwei Formation		52 – 55	Changhsingian		Changhsingian	30-40°N	401	1	tropical_everwet		calculated	tropical_everwet
3465	257	158	793	Chu et al.	2016		Pecopteris	tenuicostata								Cladophlebis	tenuicostata		(Halle, 1927) Archangelsky et Wagner	Osmundaceae	Osmundales	Pteridophyta	Osmundales	China	Weining County, Guizhou Province	Chahe section, near Chahe Town	27.1688	105.379	Locality	Chahezhen	South China	China	250	90.428	21.37	South China	Xuanwei Formation		6 – 7	Changhsingian		Changhsingian	30-40°N	401	1	tropical_everwet		calculated	tropical_everwet
3466	257	158	793	Chu et al.	2016		Compsopteris	impairs								Compsopteris	imparis		Gu et Zhi, 1974	incertae sedis	Marattiales	Pteridophyta	Marattiales	China	Weining County, Guizhou Province	Chahe section, near Chahe Town	27.1688	105.379	Locality	Chahezhen	South China	China	250	90.428	21.37	South China	Xuanwei Formation		52 – 55	Changhsingian		Changhsingian	30-40°N	401	1	tropical_everwet		calculated	tropical_everwet
3467	257	158	793	Chu et al.	2016		Compsopteris	impairs								Compsopteris	imparis		Gu et Zhi, 1974	incertae sedis	Marattiales	Pteridophyta	Marattiales	China	Weining County, Guizhou Province	Chahe section, near Chahe Town	27.1688	105.379	Locality	Chahezhen	South China	China	250	90.428	21.37	South China	Xuanwei Formation		4	Changhsingian		Changhsingian	30-40°N	401	1	tropical_everwet		calculated	tropical_everwet
3468	249	51	788	Chu et al.	2016		Compsopteris		sp.							Compsopteris		sp.		incertae sedis	Marattiales	Pteridophyta	Marattiales	China	Guizhou Province	Xiaohebian section, near Xiaohebian Village, Halahe Town	26.8233	103.997	City	Halahexiang	South China	China	250	89.479	20.447	South China	Kayitou Formation		7	Changhsingian		Changhsingian	30-40°N	28	0.477381	tropical_everwet	tropical_everwet	calculated	tropical_everwet
3469	249	51	788	Chu et al.	2016		Compsopteris		sp.							Compsopteris		sp.		incertae sedis	Marattiales	Pteridophyta	Marattiales	China	Guizhou Province	Xiaohebian section, near Xiaohebian Village, Halahe Town	26.8233	103.997	City	Halahexiang	South China	China	250	89.479	20.447	South China	Kayitou Formation		6	Changhsingian		Changhsingian	30-40°N	28	0.477381	tropical_everwet	tropical_everwet	calculated	tropical_everwet
3471	249	51	789	Chu et al.	2016		Compsopteris		sp.							Compsopteris		sp.		incertae sedis	Marattiales	Pteridophyta	Marattiales	China	Guizhou Province	Xiaohebian section, near Xiaohebian Village, Halahe Town	26.8233	103.997	City	Halahexiang	South China	China	250	89.479	20.447	South China	Xuanwei		2	Changhsingian		Changhsingian	30-40°N	28	0.477381	tropical_everwet	tropical_everwet	calculated	tropical_everwet
3472	386	124	797	Chu et al.	2016		Compsopteris		sp.							Compsopteris		sp.		incertae sedis	Marattiales	Pteridophyta	Marattiales	China	Junlian County, Sichuan Province	Jinjibang section, near Jinji village, approx. 5 km southwest of Zhenzhou town	28.1639	104.511	Area	Junlian	South China	China	250	89.171	21.834	South China	Xuanwei Formation		17	Changhsingian		Changhsingian	30-40°N	220	1	tropical_everwet		calculated	tropical_everwet
3473	386	124	797	Chu et al.	2016		Compsopteris		sp.							Compsopteris		sp.		incertae sedis	Marattiales	Pteridophyta	Marattiales	China	Junlian County, Sichuan Province	Jinjibang section, near Jinji village, approx. 5 km southwest of Zhenzhou town	28.1639	104.511	Area	Junlian	South China	China	250	89.171	21.834	South China	Xuanwei Formation		12	Changhsingian		Changhsingian	30-40°N	220	1	tropical_everwet		calculated	tropical_everwet
3474	386	124	797	Chu et al.	2016		Compsopteris		sp.							Compsopteris		sp.		incertae sedis	Marattiales	Pteridophyta	Marattiales	China	Junlian County, Sichuan Province	Jinjibang section, near Jinji village, approx. 5 km southwest of Zhenzhou town	28.1639	104.511	Area	Junlian	South China	China	250	89.171	21.834	South China	Xuanwei Formation		4	Changhsingian		Changhsingian	30-40°N	220	1	tropical_everwet		calculated	tropical_everwet
3475	254	55	790	Chu et al.	2016		Compsopteris		sp.				Zhang et al. 2016			Compsopteris		sp.		incertae sedis	Marattiales	Pteridophyta	Marattiales	China	Leju County, Yunnan Province	Guanbachong section, Zhaotong City	24.4753	101.343	Region	Yunnan Province	South China	China	250	88.523	17.22	South China	Kayitou Formation			Changhsingian		Changhsingian	20-30°N	61	1	tropical_everwet		calculated	tropical_everwet
3476	254	55	791	Chu et al.	2016		Compsopteris		sp.				Zhang et al. 2016			Compsopteris		sp.		incertae sedis	Marattiales	Pteridophyta	Marattiales	China	Leju County, Yunnan Province	Guanbachong section, Zhaotong City	24.4753	101.343	Region	Yunnan Province	South China	China	250	88.523	17.22	South China	Xuanwei Formation			Changhsingian		Changhsingian	20-30°N	61	1	tropical_everwet		calculated	tropical_everwet
3477	255	133	792	Chu et al.	2016		Compsopteris		sp.							Compsopteris		sp.		incertae sedis	Marattiales	Pteridophyta	Marattiales	China	Panxian County, Guizhou Province	Wadu section, near Wadu village	25.71	104.472	Area	Panzhou	South China	China	250	90.468	19.7	South China	Xuanwei Formation		16	Changhsingian		Changhsingian	20-30°N	170	0.543824	tropical_everwet	tropical_everwet	calculated	tropical_everwet
3478	255	133	792	Chu et al.	2016		Compsopteris		sp.							Compsopteris		sp.		incertae sedis	Marattiales	Pteridophyta	Marattiales	China	Panxian County, Guizhou Province	Wadu section, near Wadu village	25.71	104.472	Area	Panzhou	South China	China	250	90.468	19.7	South China	Xuanwei Formation		15	Changhsingian		Changhsingian	20-30°N	170	0.543824	tropical_everwet	tropical_everwet	calculated	tropical_everwet
3479	255	133	792	Chu et al.	2016		Compsopteris		sp.							Compsopteris		sp.		incertae sedis	Marattiales	Pteridophyta	Marattiales	China	Panxian County, Guizhou Province	Wadu section, near Wadu village	25.71	104.472	Area	Panzhou	South China	China	250	90.468	19.7	South China	Xuanwei Formation		14	Changhsingian		Changhsingian	20-30°N	170	0.543824	tropical_everwet	tropical_everwet	calculated	tropical_everwet
3480	255	133	792	Chu et al.	2016		Compsopteris		sp.							Compsopteris		sp.		incertae sedis	Marattiales	Pteridophyta	Marattiales	China	Panxian County, Guizhou Province	Wadu section, near Wadu village	25.71	104.472	Area	Panzhou	South China	China	250	90.468	19.7	South China	Xuanwei Formation		10	Changhsingian		Changhsingian	20-30°N	170	0.543824	tropical_everwet	tropical_everwet	calculated	tropical_everwet
3481	255	133	792	Chu et al.	2016		Compsopteris		sp.							Compsopteris		sp.		incertae sedis	Marattiales	Pteridophyta	Marattiales	China	Panxian County, Guizhou Province	Wadu section, near Wadu village	25.71	104.472	Area	Panzhou	South China	China	250	90.468	19.7	South China	Xuanwei Formation		6	Changhsingian		Changhsingian	20-30°N	170	0.543824	tropical_everwet	tropical_everwet	calculated	tropical_everwet
3482	255	133	792	Chu et al.	2016		Compsopteris		sp.							Compsopteris		sp.		incertae sedis	Marattiales	Pteridophyta	Marattiales	China	Panxian County, Guizhou Province	Wadu section, near Wadu village	25.71	104.472	Area	Panzhou	South China	China	250	90.468	19.7	South China	Xuanwei Formation		5	Changhsingian		Changhsingian	20-30°N	170	0.543824	tropical_everwet	tropical_everwet	calculated	tropical_everwet
3483	255	133	792	Chu et al.	2016		Compsopteris		sp.							Compsopteris		sp.		incertae sedis	Marattiales	Pteridophyta	Marattiales	China	Panxian County, Guizhou Province	Wadu section, near Wadu village	25.71	104.472	Area	Panzhou	South China	China	250	90.468	19.7	South China	Xuanwei Formation		2	Changhsingian		Changhsingian	20-30°N	170	0.543824	tropical_everwet	tropical_everwet	calculated	tropical_everwet
3484	257	158	793	Chu et al.	2016		Compsopteris		sp.							Compsopteris		sp.		incertae sedis	Marattiales	Pteridophyta	Marattiales	China	Weining County, Guizhou Province	Chahe section, near Chahe Town	27.1688	105.379	Locality	Chahezhen	South China	China	250	90.428	21.37	South China	Xuanwei Formation		66 – 67	Changhsingian		Changhsingian	30-40°N	401	1	tropical_everwet		calculated	tropical_everwet
3485	257	158	793	Chu et al.	2016		Compsopteris		sp.							Compsopteris		sp.		incertae sedis	Marattiales	Pteridophyta	Marattiales	China	Weining County, Guizhou Province	Chahe section, near Chahe Town	27.1688	105.379	Locality	Chahezhen	South China	China	250	90.428	21.37	South China	Xuanwei Formation		62 – 61	Changhsingian		Changhsingian	30-40°N	401	1	tropical_everwet		calculated	tropical_everwet
3486	257	158	793	Chu et al.	2016		Compsopteris		sp.							Compsopteris		sp.		incertae sedis	Marattiales	Pteridophyta	Marattiales	China	Weining County, Guizhou Province	Chahe section, near Chahe Town	27.1688	105.379	Locality	Chahezhen	South China	China	250	90.428	21.37	South China	Xuanwei Formation		60	Changhsingian		Changhsingian	30-40°N	401	1	tropical_everwet		calculated	tropical_everwet
3487	257	158	793	Chu et al.	2016		Compsopteris		sp.							Compsopteris		sp.		incertae sedis	Marattiales	Pteridophyta	Marattiales	China	Weining County, Guizhou Province	Chahe section, near Chahe Town	27.1688	105.379	Locality	Chahezhen	South China	China	250	90.428	21.37	South China	Xuanwei Formation		37 – 38	Changhsingian		Changhsingian	30-40°N	401	1	tropical_everwet		calculated	tropical_everwet
3488	257	158	793	Chu et al.	2016		Compsopteris		sp.							Compsopteris		sp.		incertae sedis	Marattiales	Pteridophyta	Marattiales	China	Weining County, Guizhou Province	Chahe section, near Chahe Town	27.1688	105.379	Locality	Chahezhen	South China	China	250	90.428	21.37	South China	Xuanwei Formation		28 – 29	Changhsingian		Changhsingian	30-40°N	401	1	tropical_everwet		calculated	tropical_everwet
3489	257	158	793	Chu et al.	2016		Compsopteris		sp.							Compsopteris		sp.		incertae sedis	Marattiales	Pteridophyta	Marattiales	China	Weining County, Guizhou Province	Chahe section, near Chahe Town	27.1688	105.379	Locality	Chahezhen	South China	China	250	90.428	21.37	South China	Xuanwei Formation		18 – 20	Changhsingian		Changhsingian	30-40°N	401	1	tropical_everwet		calculated	tropical_everwet
3490	257	158	793	Chu et al.	2016		Compsopteris		sp.							Compsopteris		sp.		incertae sedis	Marattiales	Pteridophyta	Marattiales	China	Weining County, Guizhou Province	Chahe section, near Chahe Town	27.1688	105.379	Locality	Chahezhen	South China	China	250	90.428	21.37	South China	Xuanwei Formation		14 – 17	Changhsingian		Changhsingian	30-40°N	401	1	tropical_everwet		calculated	tropical_everwet
3491	257	158	793	Chu et al.	2016		Compsopteris		sp.							Compsopteris		sp.		incertae sedis	Marattiales	Pteridophyta	Marattiales	China	Weining County, Guizhou Province	Chahe section, near Chahe Town	27.1688	105.379	Locality	Chahezhen	South China	China	250	90.428	21.37	South China	Xuanwei Formation		10 – 13	Changhsingian		Changhsingian	30-40°N	401	1	tropical_everwet		calculated	tropical_everwet
3492	257	158	793	Chu et al.	2016		Compsopteris		sp.							Compsopteris		sp.		incertae sedis	Marattiales	Pteridophyta	Marattiales	China	Weining County, Guizhou Province	Chahe section, near Chahe Town	27.1688	105.379	Locality	Chahezhen	South China	China	250	90.428	21.37	South China	Xuanwei Formation		8 – 9	Changhsingian		Changhsingian	30-40°N	401	1	tropical_everwet		calculated	tropical_everwet
3493	257	158	793	Chu et al.	2016		Compsopteris		sp.							Compsopteris		sp.		incertae sedis	Marattiales	Pteridophyta	Marattiales	China	Weining County, Guizhou Province	Chahe section, near Chahe Town	27.1688	105.379	Locality	Chahezhen	South China	China	250	90.428	21.37	South China	Xuanwei Formation		5	Changhsingian		Changhsingian	30-40°N	401	1	tropical_everwet		calculated	tropical_everwet
3494	257	158	793	Chu et al.	2016		Compsopteris		sp.							Compsopteris		sp.		incertae sedis	Marattiales	Pteridophyta	Marattiales	China	Weining County, Guizhou Province	Chahe section, near Chahe Town	27.1688	105.379	Locality	Chahezhen	South China	China	250	90.428	21.37	South China	Xuanwei Formation		4	Changhsingian		Changhsingian	30-40°N	401	1	tropical_everwet		calculated	tropical_everwet
3495	257	158	793	Chu et al.	2016		Compsopteris		sp.							Compsopteris		sp.		incertae sedis	Marattiales	Pteridophyta	Marattiales	China	Weining County, Guizhou Province	Chahe section, near Chahe Town	27.1688	105.379	Locality	Chahezhen	South China	China	250	90.428	21.37	South China	Xuanwei Formation		2 – 3	Changhsingian		Changhsingian	30-40°N	401	1	tropical_everwet		calculated	tropical_everwet
3498	249	52	802	Chu et al.	2016	?	Compsopteris		sp.						?	Compsopteris		sp.		incertae sedis	Marattiales	Pteridophyta	Marattiales	China	Guizhou Province	Xiaohebian section, near Xiaohebian Village, Halahe Town	26.8233	103.997	City	Halahexiang	South China	China	250	89.479	20.447	South China	Kayitou Formation		12	Induan		Induan	30-40°N	11	0.454545		tropical_summerwet	manual	tropical_summerwet
3499	386	124	797	Chu et al.	2016		Compsopteris	wongii								Compsopteris	wongii		(Halle, 1927) Zalessky, 1934	incertae sedis	Marattiales	Pteridophyta	Marattiales	China	Junlian County, Sichuan Province	Jinjibang section, near Jinji village, approx. 5 km southwest of Zhenzhou town	28.1639	104.511	Area	Junlian	South China	China	250	89.171	21.834	South China	Xuanwei Formation		5	Changhsingian		Changhsingian	30-40°N	220	1	tropical_everwet		calculated	tropical_everwet
3500	386	124	797	Chu et al.	2016		Compsopteris	wongii								Compsopteris	wongii		(Halle, 1927) Zalessky, 1934	incertae sedis	Marattiales	Pteridophyta	Marattiales	China	Junlian County, Sichuan Province	Jinjibang section, near Jinji village, approx. 5 km southwest of Zhenzhou town	28.1639	104.511	Area	Junlian	South China	China	250	89.171	21.834	South China	Xuanwei Formation		4	Changhsingian		Changhsingian	30-40°N	220	1	tropical_everwet		calculated	tropical_everwet
3501	386	124	797	Chu et al.	2016		Compsopteris	wongii								Compsopteris	wongii		(Halle, 1927) Zalessky, 1934	incertae sedis	Marattiales	Pteridophyta	Marattiales	China	Junlian County, Sichuan Province	Jinjibang section, near Jinji village, approx. 5 km southwest of Zhenzhou town	28.1639	104.511	Area	Junlian	South China	China	250	89.171	21.834	South China	Xuanwei Formation		3	Changhsingian		Changhsingian	30-40°N	220	1	tropical_everwet		calculated	tropical_everwet
3502	257	158	793	Chu et al.	2016		Compsopteris	wongii								Compsopteris	wongii		(Halle, 1927) Zalessky, 1934	incertae sedis	Marattiales	Pteridophyta	Marattiales	China	Weining County, Guizhou Province	Chahe section, near Chahe Town	27.1688	105.379	Locality	Chahezhen	South China	China	250	90.428	21.37	South China	Xuanwei Formation		52 – 55	Changhsingian		Changhsingian	30-40°N	401	1	tropical_everwet		calculated	tropical_everwet
3503	386	124	797	Chu et al.	2016		Cordaites	principalis								Cordaites	principalis		(Germar, 1848) Geinitz, 1855	incertae sedis	Cordaitales	Gymnospermae	Cordaitales	China	Junlian County, Sichuan Province	Jinjibang section, near Jinji village, approx. 5 km southwest of Zhenzhou town	28.1639	104.511	Area	Junlian	South China	China	250	89.171	21.834	South China	Xuanwei Formation		22	Changhsingian		Changhsingian	30-40°N	220	1	tropical_everwet		calculated	tropical_everwet
3504	386	124	797	Chu et al.	2016		Cordaites	principalis								Cordaites	principalis		(Germar, 1848) Geinitz, 1855	incertae sedis	Cordaitales	Gymnospermae	Cordaitales	China	Junlian County, Sichuan Province	Jinjibang section, near Jinji village, approx. 5 km southwest of Zhenzhou town	28.1639	104.511	Area	Junlian	South China	China	250	89.171	21.834	South China	Xuanwei Formation		13	Changhsingian		Changhsingian	30-40°N	220	1	tropical_everwet		calculated	tropical_everwet
3505	257	158	793	Chu et al.	2016		Cordaites	principalis								Cordaites	principalis		(Germar, 1848) Geinitz, 1855	incertae sedis	Cordaitales	Gymnospermae	Cordaitales	China	Weining County, Guizhou Province	Chahe section, near Chahe Town	27.1688	105.379	Locality	Chahezhen	South China	China	250	90.428	21.37	South China	Xuanwei Formation		4	Changhsingian		Changhsingian	30-40°N	401	1	tropical_everwet		calculated	tropical_everwet
3507	249	51	789	Chu et al.	2016		Cordaites		sp.							Cordaites		sp.		incertae sedis	Cordaitales	Gymnospermae	Cordaitales	China	Guizhou Province	Xiaohebian section, near Xiaohebian Village, Halahe Town	26.8233	103.997	City	Halahexiang	South China	China	250	89.479	20.447	South China	Xuanwei		2	Changhsingian		Changhsingian	30-40°N	28	0.477381	tropical_everwet	tropical_everwet	calculated	tropical_everwet
3508	1049	380	803	Chu et al.	2016		Cordaites		sp.							Cordaites		sp.		incertae sedis	Cordaitales	Gymnospermae	Cordaitales	China	Guizhou Province	Jiucaichong section, near Jiucaichong Village, Heishitou Town	25.7987	104.687	Locality	Jiucaichong	South China	China	250	90.598	19.875	South China	Xuanwei Fomation		17	Changhsingian		Changhsingian	20-30°N	172	1	tropical_everwet		calculated	tropical_everwet
3510	376	136	799	Chu et al.	2016		Cordaites		sp.							Cordaites		sp.		incertae sedis	Cordaitales	Gymnospermae	Cordaitales	China	Guizhou Province	Jinzhong section, 15 km south of Jinzhong Town	27.6193	105.344	Locality	Jinzhong	South China	China	250	90.153	21.741	South China	Xuanwei Formation		6	Changhsingian		Changhsingian	30-40°N	399	1	tropical_everwet		calculated	tropical_everwet
3511	376	136	799	Chu et al.	2016		Cordaites		sp.							Cordaites		sp.		incertae sedis	Cordaitales	Gymnospermae	Cordaitales	China	Guizhou Province	Jinzhong section, 15 km south of Jinzhong Town	27.6193	105.344	Locality	Jinzhong	South China	China	250	90.153	21.741	South China	Xuanwei Formation		4	Changhsingian		Changhsingian	30-40°N	399	1	tropical_everwet		calculated	tropical_everwet
3512	376	136	799	Chu et al.	2016		Cordaites		sp.							Cordaites		sp.		incertae sedis	Cordaitales	Gymnospermae	Cordaitales	China	Guizhou Province	Jinzhong section, 15 km south of Jinzhong Town	27.6193	105.344	Locality	Jinzhong	South China	China	250	90.153	21.741	South China	Xuanwei Formation		2	Changhsingian		Changhsingian	30-40°N	399	1	tropical_everwet		calculated	tropical_everwet
3513	376	136	799	Chu et al.	2016		Cordaites		sp.							Cordaites		sp.		incertae sedis	Cordaitales	Gymnospermae	Cordaitales	China	Guizhou Province	Jinzhong section, 15 km south of Jinzhong Town	27.6193	105.344	Locality	Jinzhong	South China	China	250	90.153	21.741	South China	Xuanwei Formation		1	Changhsingian		Changhsingian	30-40°N	399	1	tropical_everwet		calculated	tropical_everwet
3515	386	124	797	Chu et al.	2016		Cordaites		sp.							Cordaites		sp.		incertae sedis	Cordaitales	Gymnospermae	Cordaitales	China	Junlian County, Sichuan Province	Jinjibang section, near Jinji village, approx. 5 km southwest of Zhenzhou town	28.1639	104.511	Area	Junlian	South China	China	250	89.171	21.834	South China	Xuanwei Formation		22	Changhsingian		Changhsingian	30-40°N	220	1	tropical_everwet		calculated	tropical_everwet
3516	386	124	797	Chu et al.	2016		Cordaites		sp.							Cordaites		sp.		incertae sedis	Cordaitales	Gymnospermae	Cordaitales	China	Junlian County, Sichuan Province	Jinjibang section, near Jinji village, approx. 5 km southwest of Zhenzhou town	28.1639	104.511	Area	Junlian	South China	China	250	89.171	21.834	South China	Xuanwei Formation		21	Changhsingian		Changhsingian	30-40°N	220	1	tropical_everwet		calculated	tropical_everwet
3517	386	124	797	Chu et al.	2016		Cordaites		sp.							Cordaites		sp.		incertae sedis	Cordaitales	Gymnospermae	Cordaitales	China	Junlian County, Sichuan Province	Jinjibang section, near Jinji village, approx. 5 km southwest of Zhenzhou town	28.1639	104.511	Area	Junlian	South China	China	250	89.171	21.834	South China	Xuanwei Formation		19	Changhsingian		Changhsingian	30-40°N	220	1	tropical_everwet		calculated	tropical_everwet
3518	386	124	797	Chu et al.	2016		Cordaites		sp.							Cordaites		sp.		incertae sedis	Cordaitales	Gymnospermae	Cordaitales	China	Junlian County, Sichuan Province	Jinjibang section, near Jinji village, approx. 5 km southwest of Zhenzhou town	28.1639	104.511	Area	Junlian	South China	China	250	89.171	21.834	South China	Xuanwei Formation		17	Changhsingian		Changhsingian	30-40°N	220	1	tropical_everwet		calculated	tropical_everwet
3519	386	124	797	Chu et al.	2016		Cordaites		sp.							Cordaites		sp.		incertae sedis	Cordaitales	Gymnospermae	Cordaitales	China	Junlian County, Sichuan Province	Jinjibang section, near Jinji village, approx. 5 km southwest of Zhenzhou town	28.1639	104.511	Area	Junlian	South China	China	250	89.171	21.834	South China	Xuanwei Formation		16	Changhsingian		Changhsingian	30-40°N	220	1	tropical_everwet		calculated	tropical_everwet
3520	386	124	797	Chu et al.	2016		Cordaites		sp.							Cordaites		sp.		incertae sedis	Cordaitales	Gymnospermae	Cordaitales	China	Junlian County, Sichuan Province	Jinjibang section, near Jinji village, approx. 5 km southwest of Zhenzhou town	28.1639	104.511	Area	Junlian	South China	China	250	89.171	21.834	South China	Xuanwei Formation		15	Changhsingian		Changhsingian	30-40°N	220	1	tropical_everwet		calculated	tropical_everwet
3521	386	124	797	Chu et al.	2016		Cordaites		sp.							Cordaites		sp.		incertae sedis	Cordaitales	Gymnospermae	Cordaitales	China	Junlian County, Sichuan Province	Jinjibang section, near Jinji village, approx. 5 km southwest of Zhenzhou town	28.1639	104.511	Area	Junlian	South China	China	250	89.171	21.834	South China	Xuanwei Formation		13	Changhsingian		Changhsingian	30-40°N	220	1	tropical_everwet		calculated	tropical_everwet
3522	386	124	797	Chu et al.	2016		Cordaites		sp.							Cordaites		sp.		incertae sedis	Cordaitales	Gymnospermae	Cordaitales	China	Junlian County, Sichuan Province	Jinjibang section, near Jinji village, approx. 5 km southwest of Zhenzhou town	28.1639	104.511	Area	Junlian	South China	China	250	89.171	21.834	South China	Xuanwei Formation		12	Changhsingian		Changhsingian	30-40°N	220	1	tropical_everwet		calculated	tropical_everwet
3523	386	124	797	Chu et al.	2016		Cordaites		sp.							Cordaites		sp.		incertae sedis	Cordaitales	Gymnospermae	Cordaitales	China	Junlian County, Sichuan Province	Jinjibang section, near Jinji village, approx. 5 km southwest of Zhenzhou town	28.1639	104.511	Area	Junlian	South China	China	250	89.171	21.834	South China	Xuanwei Formation		11	Changhsingian		Changhsingian	30-40°N	220	1	tropical_everwet		calculated	tropical_everwet
3524	386	124	797	Chu et al.	2016		Cordaites		sp.							Cordaites		sp.		incertae sedis	Cordaitales	Gymnospermae	Cordaitales	China	Junlian County, Sichuan Province	Jinjibang section, near Jinji village, approx. 5 km southwest of Zhenzhou town	28.1639	104.511	Area	Junlian	South China	China	250	89.171	21.834	South China	Xuanwei Formation		9	Changhsingian		Changhsingian	30-40°N	220	1	tropical_everwet		calculated	tropical_everwet
3525	386	124	797	Chu et al.	2016		Cordaites		sp.							Cordaites		sp.		incertae sedis	Cordaitales	Gymnospermae	Cordaitales	China	Junlian County, Sichuan Province	Jinjibang section, near Jinji village, approx. 5 km southwest of Zhenzhou town	28.1639	104.511	Area	Junlian	South China	China	250	89.171	21.834	South China	Xuanwei Formation		6	Changhsingian		Changhsingian	30-40°N	220	1	tropical_everwet		calculated	tropical_everwet
3526	386	124	797	Chu et al.	2016		Cordaites		sp.							Cordaites		sp.		incertae sedis	Cordaitales	Gymnospermae	Cordaitales	China	Junlian County, Sichuan Province	Jinjibang section, near Jinji village, approx. 5 km southwest of Zhenzhou town	28.1639	104.511	Area	Junlian	South China	China	250	89.171	21.834	South China	Xuanwei Formation		5	Changhsingian		Changhsingian	30-40°N	220	1	tropical_everwet		calculated	tropical_everwet
3527	386	124	797	Chu et al.	2016		Cordaites		sp.							Cordaites		sp.		incertae sedis	Cordaitales	Gymnospermae	Cordaitales	China	Junlian County, Sichuan Province	Jinjibang section, near Jinji village, approx. 5 km southwest of Zhenzhou town	28.1639	104.511	Area	Junlian	South China	China	250	89.171	21.834	South China	Xuanwei Formation		4	Changhsingian		Changhsingian	30-40°N	220	1	tropical_everwet		calculated	tropical_everwet
3528	386	124	797	Chu et al.	2016		Cordaites		sp.							Cordaites		sp.		incertae sedis	Cordaitales	Gymnospermae	Cordaitales	China	Junlian County, Sichuan Province	Jinjibang section, near Jinji village, approx. 5 km southwest of Zhenzhou town	28.1639	104.511	Area	Junlian	South China	China	250	89.171	21.834	South China	Xuanwei Formation		3	Changhsingian		Changhsingian	30-40°N	220	1	tropical_everwet		calculated	tropical_everwet
3529	386	124	797	Chu et al.	2016		Cordaites		sp.							Cordaites		sp.		incertae sedis	Cordaitales	Gymnospermae	Cordaitales	China	Junlian County, Sichuan Province	Jinjibang section, near Jinji village, approx. 5 km southwest of Zhenzhou town	28.1639	104.511	Area	Junlian	South China	China	250	89.171	21.834	South China	Xuanwei Formation		2	Changhsingian		Changhsingian	30-40°N	220	1	tropical_everwet		calculated	tropical_everwet
3530	386	124	797	Chu et al.	2016		Cordaites		sp.							Cordaites		sp.		incertae sedis	Cordaitales	Gymnospermae	Cordaitales	China	Junlian County, Sichuan Province	Jinjibang section, near Jinji village, approx. 5 km southwest of Zhenzhou town	28.1639	104.511	Area	Junlian	South China	China	250	89.171	21.834	South China	Xuanwei Formation		1	Changhsingian		Changhsingian	30-40°N	220	1	tropical_everwet		calculated	tropical_everwet
3531	255	133	792	Chu et al.	2016		Cordaites		sp.							Cordaites		sp.		incertae sedis	Cordaitales	Gymnospermae	Cordaitales	China	Panxian County, Guizhou Province	Wadu section, near Wadu village	25.71	104.472	Area	Panzhou	South China	China	250	90.468	19.7	South China	Xuanwei Formation		8	Changhsingian		Changhsingian	20-30°N	170	0.543824	tropical_everwet	tropical_everwet	calculated	tropical_everwet
3532	255	133	792	Chu et al.	2016		Cordaites		sp.							Cordaites		sp.		incertae sedis	Cordaitales	Gymnospermae	Cordaitales	China	Panxian County, Guizhou Province	Wadu section, near Wadu village	25.71	104.472	Area	Panzhou	South China	China	250	90.468	19.7	South China	Xuanwei Formation		6	Changhsingian		Changhsingian	20-30°N	170	0.543824	tropical_everwet	tropical_everwet	calculated	tropical_everwet
3533	257	158	793	Chu et al.	2016		Cordaites		sp.							Cordaites		sp.		incertae sedis	Cordaitales	Gymnospermae	Cordaitales	China	Weining County, Guizhou Province	Chahe section, near Chahe Town	27.1688	105.379	Locality	Chahezhen	South China	China	250	90.428	21.37	South China	Xuanwei Formation		66 – 67	Changhsingian		Changhsingian	30-40°N	401	1	tropical_everwet		calculated	tropical_everwet
3534	257	158	793	Chu et al.	2016		Cordaites		sp.							Cordaites		sp.		incertae sedis	Cordaitales	Gymnospermae	Cordaitales	China	Weining County, Guizhou Province	Chahe section, near Chahe Town	27.1688	105.379	Locality	Chahezhen	South China	China	250	90.428	21.37	South China	Xuanwei Formation		60	Changhsingian		Changhsingian	30-40°N	401	1	tropical_everwet		calculated	tropical_everwet
3535	257	158	793	Chu et al.	2016		Cordaites		sp.							Cordaites		sp.		incertae sedis	Cordaitales	Gymnospermae	Cordaitales	China	Weining County, Guizhou Province	Chahe section, near Chahe Town	27.1688	105.379	Locality	Chahezhen	South China	China	250	90.428	21.37	South China	Xuanwei Formation		52 – 55	Changhsingian		Changhsingian	30-40°N	401	1	tropical_everwet		calculated	tropical_everwet
3536	257	158	793	Chu et al.	2016		Cordaites		sp.							Cordaites		sp.		incertae sedis	Cordaitales	Gymnospermae	Cordaitales	China	Weining County, Guizhou Province	Chahe section, near Chahe Town	27.1688	105.379	Locality	Chahezhen	South China	China	250	90.428	21.37	South China	Xuanwei Formation		21 – 22	Changhsingian		Changhsingian	30-40°N	401	1	tropical_everwet		calculated	tropical_everwet
3537	257	158	793	Chu et al.	2016		Cordaites		sp.							Cordaites		sp.		incertae sedis	Cordaitales	Gymnospermae	Cordaitales	China	Weining County, Guizhou Province	Chahe section, near Chahe Town	27.1688	105.379	Locality	Chahezhen	South China	China	250	90.428	21.37	South China	Xuanwei Formation		14 – 17	Changhsingian		Changhsingian	30-40°N	401	1	tropical_everwet		calculated	tropical_everwet
3539	1049	381	806	Chu et al.	2016	?	Cordaites		sp.						?	Pelourdea		sp.		incertae sedis	incertae sedis	Coniferophyta	Coniferophyta incertae sedis	China	Guizhou Province	Jiucaichong section, near Jiucaichong Village, Heishitou Town	25.7987	104.687	Locality	Jiucaichong	South China	China	250	90.598	19.875	South China	Kayitou Formation		25	Induan		Induan	20-30°N	41	0.357724	tropical_summerwet	tropical_summerwet	calculated	tropical_summerwet
3540	386	124	797	Chu et al.	2016		Pecopteris	hemitelioides								Cyathocarpus	hemitelioides		(Brongniart) Mosbrugger	Marattiaceae	Marattiales	Pteridophyta	Marattiales	China	Junlian County, Sichuan Province	Jinjibang section, near Jinji village, approx. 5 km southwest of Zhenzhou town	28.1639	104.511	Area	Junlian	South China	China	250	89.171	21.834	South China	Xuanwei Formation		17	Changhsingian		Changhsingian	30-40°N	220	1	tropical_everwet		calculated	tropical_everwet
3541	386	124	797	Chu et al.	2016		Pecopteris	hemitelioides								Cyathocarpus	hemitelioides		(Brongniart) Mosbrugger	Marattiaceae	Marattiales	Pteridophyta	Marattiales	China	Junlian County, Sichuan Province	Jinjibang section, near Jinji village, approx. 5 km southwest of Zhenzhou town	28.1639	104.511	Area	Junlian	South China	China	250	89.171	21.834	South China	Xuanwei Formation		16	Changhsingian		Changhsingian	30-40°N	220	1	tropical_everwet		calculated	tropical_everwet
3542	386	124	797	Chu et al.	2016		Pecopteris	hemitelioides								Cyathocarpus	hemitelioides		(Brongniart) Mosbrugger	Marattiaceae	Marattiales	Pteridophyta	Marattiales	China	Junlian County, Sichuan Province	Jinjibang section, near Jinji village, approx. 5 km southwest of Zhenzhou town	28.1639	104.511	Area	Junlian	South China	China	250	89.171	21.834	South China	Xuanwei Formation		13	Changhsingian		Changhsingian	30-40°N	220	1	tropical_everwet		calculated	tropical_everwet
3543	386	124	797	Chu et al.	2016		Pecopteris	hemitelioides								Cyathocarpus	hemitelioides		(Brongniart) Mosbrugger	Marattiaceae	Marattiales	Pteridophyta	Marattiales	China	Junlian County, Sichuan Province	Jinjibang section, near Jinji village, approx. 5 km southwest of Zhenzhou town	28.1639	104.511	Area	Junlian	South China	China	250	89.171	21.834	South China	Xuanwei Formation		8	Changhsingian		Changhsingian	30-40°N	220	1	tropical_everwet		calculated	tropical_everwet
3544	386	124	797	Chu et al.	2016		Pecopteris	hemitelioides								Cyathocarpus	hemitelioides		(Brongniart) Mosbrugger	Marattiaceae	Marattiales	Pteridophyta	Marattiales	China	Junlian County, Sichuan Province	Jinjibang section, near Jinji village, approx. 5 km southwest of Zhenzhou town	28.1639	104.511	Area	Junlian	South China	China	250	89.171	21.834	South China	Xuanwei Formation		6	Changhsingian		Changhsingian	30-40°N	220	1	tropical_everwet		calculated	tropical_everwet
3545	255	133	792	Chu et al.	2016		Pecopteris	hemitelioides								Cyathocarpus	hemitelioides		(Brongniart) Mosbrugger	Marattiaceae	Marattiales	Pteridophyta	Marattiales	China	Panxian County, Guizhou Province	Wadu section, near Wadu village	25.71	104.472	Area	Panzhou	South China	China	250	90.468	19.7	South China	Xuanwei Formation		15	Changhsingian		Changhsingian	20-30°N	170	0.543824	tropical_everwet	tropical_everwet	calculated	tropical_everwet
3546	255	133	792	Chu et al.	2016		Pecopteris	hemitelioides								Cyathocarpus	hemitelioides		(Brongniart) Mosbrugger	Marattiaceae	Marattiales	Pteridophyta	Marattiales	China	Panxian County, Guizhou Province	Wadu section, near Wadu village	25.71	104.472	Area	Panzhou	South China	China	250	90.468	19.7	South China	Xuanwei Formation		14	Changhsingian		Changhsingian	20-30°N	170	0.543824	tropical_everwet	tropical_everwet	calculated	tropical_everwet
3547	255	133	792	Chu et al.	2016		Pecopteris	hemitelioides								Cyathocarpus	hemitelioides		(Brongniart) Mosbrugger	Marattiaceae	Marattiales	Pteridophyta	Marattiales	China	Panxian County, Guizhou Province	Wadu section, near Wadu village	25.71	104.472	Area	Panzhou	South China	China	250	90.468	19.7	South China	Xuanwei Formation		11	Changhsingian		Changhsingian	20-30°N	170	0.543824	tropical_everwet	tropical_everwet	calculated	tropical_everwet
3548	257	158	793	Chu et al.	2016		Pecopteris	hemiteloides								Cyathocarpus	hemitelioides		(Brongniart) Mosbrugger	Marattiaceae	Marattiales	Pteridophyta	Marattiales	China	Weining County, Guizhou Province	Chahe section, near Chahe Town	27.1688	105.379	Locality	Chahezhen	South China	China	250	90.428	21.37	South China	Xuanwei Formation		18 – 20	Changhsingian		Changhsingian	30-40°N	401	1	tropical_everwet		calculated	tropical_everwet
3549	254	55	790	Chu et al.	2016	?	Distichotheca	crossothecoides						Zhang et al. 2016	?	Distichotheca	crossothecoides		Gu et Zhi, 1974	incertae sedis	Filicales	Pteridophyta	Filicales	China	Leju County, Yunnan Province	Guanbachong section, Zhaotong City	24.4753	101.343	Region	Yunnan Province	South China	China	250	88.523	17.22	South China	Kayitou Formation			Changhsingian		Changhsingian	20-30°N	61	1	tropical_everwet		calculated	tropical_everwet
3550	254	55	791	Chu et al.	2016	?	Distichotheca	crossothecoides						Zhang et al. 2016	?	Distichotheca	crossothecoides		Gu et Zhi, 1974	incertae sedis	Filicales	Pteridophyta	Filicales	China	Leju County, Yunnan Province	Guanbachong section, Zhaotong City	24.4753	101.343	Region	Yunnan Province	South China	China	250	88.523	17.22	South China	Xuanwei Formation			Changhsingian		Changhsingian	20-30°N	61	1	tropical_everwet		calculated	tropical_everwet
3551	255	133	792	Chu et al.	2016		Fascipteris	hallei								Fascipteris	hallei		(Kawasaki, 1931) Gu et Zhi, 1974	incertae sedis	Marattiales	Pteridophyta	Marattiales	China	Panxian County, Guizhou Province	Wadu section, near Wadu village	25.71	104.472	Area	Panzhou	South China	China	250	90.468	19.7	South China	Xuanwei Formation		14	Changhsingian		Changhsingian	20-30°N	170	0.543824	tropical_everwet	tropical_everwet	calculated	tropical_everwet
3552	257	158	793	Chu et al.	2016		Fascipteris	hallei								Fascipteris	hallei		(Kawasaki, 1931) Gu et Zhi, 1974	incertae sedis	Marattiales	Pteridophyta	Marattiales	China	Weining County, Guizhou Province	Chahe section, near Chahe Town	27.1688	105.379	Locality	Chahezhen	South China	China	250	90.428	21.37	South China	Xuanwei Formation		6 – 7	Changhsingian		Changhsingian	30-40°N	401	1	tropical_everwet		calculated	tropical_everwet
3553	257	158	793	Chu et al.	2016		Fascipteris	hallei								Fascipteris	hallei		(Kawasaki, 1931) Gu et Zhi, 1974	incertae sedis	Marattiales	Pteridophyta	Marattiales	China	Weining County, Guizhou Province	Chahe section, near Chahe Town	27.1688	105.379	Locality	Chahezhen	South China	China	250	90.428	21.37	South China	Xuanwei Formation		4	Changhsingian		Changhsingian	30-40°N	401	1	tropical_everwet		calculated	tropical_everwet
3554	257	158	793	Chu et al.	2016		Fascipteris	hallei								Fascipteris	hallei		(Kawasaki, 1931) Gu et Zhi, 1974	incertae sedis	Marattiales	Pteridophyta	Marattiales	China	Weining County, Guizhou Province	Chahe section, near Chahe Town	27.1688	105.379	Locality	Chahezhen	South China	China	250	90.428	21.37	South China	Xuanwei Formation		2 – 3	Changhsingian		Changhsingian	30-40°N	401	1	tropical_everwet		calculated	tropical_everwet
3555	1049	380	803	Chu et al.	2016		Fascipteris		sp.							Fascipteris		sp.		incertae sedis	Marattiales	Pteridophyta	Marattiales	China	Guizhou Province	Jiucaichong section, near Jiucaichong Village, Heishitou Town	25.7987	104.687	Locality	Jiucaichong	South China	China	250	90.598	19.875	South China	Xuanwei Fomation		17	Changhsingian		Changhsingian	20-30°N	172	1	tropical_everwet		calculated	tropical_everwet
3556	255	133	792	Chu et al.	2016		Fascipteris		sp.							Fascipteris		sp.		incertae sedis	Marattiales	Pteridophyta	Marattiales	China	Panxian County, Guizhou Province	Wadu section, near Wadu village	25.71	104.472	Area	Panzhou	South China	China	250	90.468	19.7	South China	Xuanwei Formation		16	Changhsingian		Changhsingian	20-30°N	170	0.543824	tropical_everwet	tropical_everwet	calculated	tropical_everwet
3557	255	133	792	Chu et al.	2016		Fascipteris		sp.							Fascipteris		sp.		incertae sedis	Marattiales	Pteridophyta	Marattiales	China	Panxian County, Guizhou Province	Wadu section, near Wadu village	25.71	104.472	Area	Panzhou	South China	China	250	90.468	19.7	South China	Xuanwei Formation		15	Changhsingian		Changhsingian	20-30°N	170	0.543824	tropical_everwet	tropical_everwet	calculated	tropical_everwet
3558	255	133	792	Chu et al.	2016		Fascipteris		sp.							Fascipteris		sp.		incertae sedis	Marattiales	Pteridophyta	Marattiales	China	Panxian County, Guizhou Province	Wadu section, near Wadu village	25.71	104.472	Area	Panzhou	South China	China	250	90.468	19.7	South China	Xuanwei Formation		6	Changhsingian		Changhsingian	20-30°N	170	0.543824	tropical_everwet	tropical_everwet	calculated	tropical_everwet
3559	257	158	793	Chu et al.	2016		Fascipteris		sp.							Fascipteris		sp.		incertae sedis	Marattiales	Pteridophyta	Marattiales	China	Weining County, Guizhou Province	Chahe section, near Chahe Town	27.1688	105.379	Locality	Chahezhen	South China	China	250	90.428	21.37	South China	Xuanwei Formation		14 – 17	Changhsingian		Changhsingian	30-40°N	401	1	tropical_everwet		calculated	tropical_everwet
3561	386	124	797	Chu et al.	2016		Fascipteris	stena								Fascipteris	stena		Gu et Zhi, 1974	incertae sedis	Marattiales	Pteridophyta	Marattiales	China	Junlian County, Sichuan Province	Jinjibang section, near Jinji village, approx. 5 km southwest of Zhenzhou town	28.1639	104.511	Area	Junlian	South China	China	250	89.171	21.834	South China	Xuanwei Formation		13	Changhsingian		Changhsingian	30-40°N	220	1	tropical_everwet		calculated	tropical_everwet
3562	386	124	797	Chu et al.	2016		Fascipteris	stena								Fascipteris	stena		Gu et Zhi, 1974	incertae sedis	Marattiales	Pteridophyta	Marattiales	China	Junlian County, Sichuan Province	Jinjibang section, near Jinji village, approx. 5 km southwest of Zhenzhou town	28.1639	104.511	Area	Junlian	South China	China	250	89.171	21.834	South China	Xuanwei Formation		8	Changhsingian		Changhsingian	30-40°N	220	1	tropical_everwet		calculated	tropical_everwet
3563	386	124	797	Chu et al.	2016		Fascipteris	stena								Fascipteris	stena		Gu et Zhi, 1974	incertae sedis	Marattiales	Pteridophyta	Marattiales	China	Junlian County, Sichuan Province	Jinjibang section, near Jinji village, approx. 5 km southwest of Zhenzhou town	28.1639	104.511	Area	Junlian	South China	China	250	89.171	21.834	South China	Xuanwei Formation		6	Changhsingian		Changhsingian	30-40°N	220	1	tropical_everwet		calculated	tropical_everwet
3564	257	158	793	Chu et al.	2016		Fascipteris	stena								Fascipteris	stena		Gu et Zhi, 1974	incertae sedis	Marattiales	Pteridophyta	Marattiales	China	Weining County, Guizhou Province	Chahe section, near Chahe Town	27.1688	105.379	Locality	Chahezhen	South China	China	250	90.428	21.37	South China	Xuanwei Formation		5	Changhsingian		Changhsingian	30-40°N	401	1	tropical_everwet		calculated	tropical_everwet
3565	386	124	797	Chu et al.	2016		Gigantonoclea	hallci								Gigantonoclea	hallei		(Asama, 1959) Gu et Zhi, 1974	incertae sedis	Gigantopteridales	Gymnospermae	Gigantopteridales	China	Junlian County, Sichuan Province	Jinjibang section, near Jinji village, approx. 5 km southwest of Zhenzhou town	28.1639	104.511	Area	Junlian	South China	China	250	89.171	21.834	South China	Xuanwei Formation		16	Changhsingian		Changhsingian	30-40°N	220	1	tropical_everwet		calculated	tropical_everwet
3566	386	124	797	Chu et al.	2016		Gigantonoclea	hallci								Gigantonoclea	hallei		(Asama, 1959) Gu et Zhi, 1974	incertae sedis	Gigantopteridales	Gymnospermae	Gigantopteridales	China	Junlian County, Sichuan Province	Jinjibang section, near Jinji village, approx. 5 km southwest of Zhenzhou town	28.1639	104.511	Area	Junlian	South China	China	250	89.171	21.834	South China	Xuanwei Formation		8	Changhsingian		Changhsingian	30-40°N	220	1	tropical_everwet		calculated	tropical_everwet
3567	257	158	793	Chu et al.	2016		Gigantonoclea	hallei								Gigantonoclea	hallei		(Asama, 1959) Gu et Zhi, 1974	incertae sedis	Gigantopteridales	Gymnospermae	Gigantopteridales	China	Weining County, Guizhou Province	Chahe section, near Chahe Town	27.1688	105.379	Locality	Chahezhen	South China	China	250	90.428	21.37	South China	Xuanwei Formation		60	Changhsingian		Changhsingian	30-40°N	401	1	tropical_everwet		calculated	tropical_everwet
3568	257	158	793	Chu et al.	2016		Gigantonoclea	hallei								Gigantonoclea	hallei		(Asama, 1959) Gu et Zhi, 1974	incertae sedis	Gigantopteridales	Gymnospermae	Gigantopteridales	China	Weining County, Guizhou Province	Chahe section, near Chahe Town	27.1688	105.379	Locality	Chahezhen	South China	China	250	90.428	21.37	South China	Xuanwei Formation		14 – 17	Changhsingian		Changhsingian	30-40°N	401	1	tropical_everwet		calculated	tropical_everwet
3569	257	158	793	Chu et al.	2016		Gigantonoclea	lagrelii								Gigantonoclea	lagrelii		(Halle, 1927) Koidzumi, 1936	incertae sedis	Gigantopteridales	Gymnospermae	Gigantopteridales	China	Weining County, Guizhou Province	Chahe section, near Chahe Town	27.1688	105.379	Locality	Chahezhen	South China	China	250	90.428	21.37	South China	Xuanwei Formation		60	Changhsingian		Changhsingian	30-40°N	401	1	tropical_everwet		calculated	tropical_everwet
3570	257	158	793	Chu et al.	2016		Gigantonoclea	lagrelii								Gigantonoclea	lagrelii		(Halle, 1927) Koidzumi, 1936	incertae sedis	Gigantopteridales	Gymnospermae	Gigantopteridales	China	Weining County, Guizhou Province	Chahe section, near Chahe Town	27.1688	105.379	Locality	Chahezhen	South China	China	250	90.428	21.37	South China	Xuanwei Formation		4	Changhsingian		Changhsingian	30-40°N	401	1	tropical_everwet		calculated	tropical_everwet
3572	254	55	790	Chu et al.	2016		Gigantonoclea	longifolia						Zhang et al. 2016		Gigantonoclea	longifolia		(Kodaira, 1930) Gu et Zhi, 1974	incertae sedis	Gigantopteridales	Gymnospermae	Gigantopteridales	China	Leju County, Yunnan Province	Guanbachong section, Zhaotong City	24.4753	101.343	Region	Yunnan Province	South China	China	250	88.523	17.22	South China	Kayitou Formation			Changhsingian		Changhsingian	20-30°N	61	1	tropical_everwet		calculated	tropical_everwet
3573	386	124	797	Chu et al.	2016		Gigantopteris	nicotianaefolia	cf.							Gigantonoclea	nicotianaefolia	cf.	(Schenk) Gu et Zhi, 1974	incertae sedis	Gigantopteridales	Gymnospermae	Gigantopteridales	China	Junlian County, Sichuan Province	Jinjibang section, near Jinji village, approx. 5 km southwest of Zhenzhou town	28.1639	104.511	Area	Junlian	South China	China	250	89.171	21.834	South China	Xuanwei Formation		22	Changhsingian		Changhsingian	30-40°N	220	1	tropical_everwet		calculated	tropical_everwet
3574	386	124	797	Chu et al.	2016		Gigantopteris	nicotianaefolia	cf.							Gigantonoclea	nicotianaefolia	cf.	(Schenk) Gu et Zhi, 1974	incertae sedis	Gigantopteridales	Gymnospermae	Gigantopteridales	China	Junlian County, Sichuan Province	Jinjibang section, near Jinji village, approx. 5 km southwest of Zhenzhou town	28.1639	104.511	Area	Junlian	South China	China	250	89.171	21.834	South China	Xuanwei Formation		13	Changhsingian		Changhsingian	30-40°N	220	1	tropical_everwet		calculated	tropical_everwet
3575	386	124	797	Chu et al.	2016		Gigantopteris	nicotianaefolia	cf.							Gigantonoclea	nicotianaefolia	cf.	(Schenk) Gu et Zhi, 1974	incertae sedis	Gigantopteridales	Gymnospermae	Gigantopteridales	China	Junlian County, Sichuan Province	Jinjibang section, near Jinji village, approx. 5 km southwest of Zhenzhou town	28.1639	104.511	Area	Junlian	South China	China	250	89.171	21.834	South China	Xuanwei Formation		5	Changhsingian		Changhsingian	30-40°N	220	1	tropical_everwet		calculated	tropical_everwet
3576	257	158	793	Chu et al.	2016		Gigantopteris	nicotianefolia								Gigantonoclea	nicotianaefolia		(Schenk) Gu et Zhi, 1974	incertae sedis	Gigantopteridales	Gymnospermae	Gigantopteridales	China	Weining County, Guizhou Province	Chahe section, near Chahe Town	27.1688	105.379	Locality	Chahezhen	South China	China	250	90.428	21.37	South China	Xuanwei Formation		60	Changhsingian		Changhsingian	30-40°N	401	1	tropical_everwet		calculated	tropical_everwet
3577	257	158	793	Chu et al.	2016		Gigantopteris	nicotianefolia								Gigantonoclea	nicotianaefolia		(Schenk) Gu et Zhi, 1974	incertae sedis	Gigantopteridales	Gymnospermae	Gigantopteridales	China	Weining County, Guizhou Province	Chahe section, near Chahe Town	27.1688	105.379	Locality	Chahezhen	South China	China	250	90.428	21.37	South China	Xuanwei Formation		47 – 48	Changhsingian		Changhsingian	30-40°N	401	1	tropical_everwet		calculated	tropical_everwet
3578	257	158	793	Chu et al.	2016		Gigantopteris	nicotianefolia								Gigantonoclea	nicotianaefolia		(Schenk) Gu et Zhi, 1974	incertae sedis	Gigantopteridales	Gymnospermae	Gigantopteridales	China	Weining County, Guizhou Province	Chahe section, near Chahe Town	27.1688	105.379	Locality	Chahezhen	South China	China	250	90.428	21.37	South China	Xuanwei Formation		14 – 17	Changhsingian		Changhsingian	30-40°N	401	1	tropical_everwet		calculated	tropical_everwet
3580	255	133	792	Chu et al.	2016		Gigantopteris	ricotianaefolia								Gigantonoclea	nicotianaefolia		(Schenk) Gu et Zhi, 1974	incertae sedis	Gigantopteridales	Gymnospermae	Gigantopteridales	China	Panxian County, Guizhou Province	Wadu section, near Wadu village	25.71	104.472	Area	Panzhou	South China	China	250	90.468	19.7	South China	Xuanwei Formation		10	Changhsingian		Changhsingian	20-30°N	170	0.543824	tropical_everwet	tropical_everwet	calculated	tropical_everwet
3582	255	133	792	Chu et al.	2016		Gigantonoclea	plumosa								Gigantonoclea	plumosa		Mo, 1980	incertae sedis	Gigantopteridales	Gymnospermae	Gigantopteridales	China	Panxian County, Guizhou Province	Wadu section, near Wadu village	25.71	104.472	Area	Panzhou	South China	China	250	90.468	19.7	South China	Xuanwei Formation		14	Changhsingian		Changhsingian	20-30°N	170	0.543824	tropical_everwet	tropical_everwet	calculated	tropical_everwet
3583	249	51	788	Chu et al.	2016		Gigantonoclea		sp.							Gigantonoclea		sp.		incertae sedis	Gigantopteridales	Gymnospermae	Gigantopteridales	China	Guizhou Province	Xiaohebian section, near Xiaohebian Village, Halahe Town	26.8233	103.997	City	Halahexiang	South China	China	250	89.479	20.447	South China	Kayitou Formation		7	Changhsingian		Changhsingian	30-40°N	28	0.477381	tropical_everwet	tropical_everwet	calculated	tropical_everwet
3584	376	136	799	Chu et al.	2016		Gigantonoclea		sp.							Gigantonoclea		sp.		incertae sedis	Gigantopteridales	Gymnospermae	Gigantopteridales	China	Guizhou Province	Jinzhong section, 15 km south of Jinzhong Town	27.6193	105.344	Locality	Jinzhong	South China	China	250	90.153	21.741	South China	Xuanwei Formation		3	Changhsingian		Changhsingian	30-40°N	399	1	tropical_everwet		calculated	tropical_everwet
3585	376	136	799	Chu et al.	2016		Gigantonoclea		sp.							Gigantonoclea		sp.		incertae sedis	Gigantopteridales	Gymnospermae	Gigantopteridales	China	Guizhou Province	Jinzhong section, 15 km south of Jinzhong Town	27.6193	105.344	Locality	Jinzhong	South China	China	250	90.153	21.741	South China	Xuanwei Formation		2	Changhsingian		Changhsingian	30-40°N	399	1	tropical_everwet		calculated	tropical_everwet
3586	386	124	797	Chu et al.	2016		Gigantonoclea		sp.							Gigantonoclea		sp.		incertae sedis	Gigantopteridales	Gymnospermae	Gigantopteridales	China	Junlian County, Sichuan Province	Jinjibang section, near Jinji village, approx. 5 km southwest of Zhenzhou town	28.1639	104.511	Area	Junlian	South China	China	250	89.171	21.834	South China	Xuanwei Formation		13	Changhsingian		Changhsingian	30-40°N	220	1	tropical_everwet		calculated	tropical_everwet
3587	386	124	797	Chu et al.	2016		Gigantonoclea		sp.							Gigantonoclea		sp.		incertae sedis	Gigantopteridales	Gymnospermae	Gigantopteridales	China	Junlian County, Sichuan Province	Jinjibang section, near Jinji village, approx. 5 km southwest of Zhenzhou town	28.1639	104.511	Area	Junlian	South China	China	250	89.171	21.834	South China	Xuanwei Formation		9	Changhsingian		Changhsingian	30-40°N	220	1	tropical_everwet		calculated	tropical_everwet
3588	255	133	792	Chu et al.	2016		Gigantonoclea		sp.							Gigantonoclea		sp.		incertae sedis	Gigantopteridales	Gymnospermae	Gigantopteridales	China	Panxian County, Guizhou Province	Wadu section, near Wadu village	25.71	104.472	Area	Panzhou	South China	China	250	90.468	19.7	South China	Xuanwei Formation		15	Changhsingian		Changhsingian	20-30°N	170	0.543824	tropical_everwet	tropical_everwet	calculated	tropical_everwet
3589	255	133	792	Chu et al.	2016		Gigantonoclea		sp.							Gigantonoclea		sp.		incertae sedis	Gigantopteridales	Gymnospermae	Gigantopteridales	China	Panxian County, Guizhou Province	Wadu section, near Wadu village	25.71	104.472	Area	Panzhou	South China	China	250	90.468	19.7	South China	Xuanwei Formation		14	Changhsingian		Changhsingian	20-30°N	170	0.543824	tropical_everwet	tropical_everwet	calculated	tropical_everwet
3590	257	158	793	Chu et al.	2016		Gigantonoclea		sp.							Gigantonoclea		sp.		incertae sedis	Gigantopteridales	Gymnospermae	Gigantopteridales	China	Weining County, Guizhou Province	Chahe section, near Chahe Town	27.1688	105.379	Locality	Chahezhen	South China	China	250	90.428	21.37	South China	Xuanwei Formation		66 – 67	Changhsingian		Changhsingian	30-40°N	401	1	tropical_everwet		calculated	tropical_everwet
3591	257	158	793	Chu et al.	2016		Gigantonoclea		sp.							Gigantonoclea		sp.		incertae sedis	Gigantopteridales	Gymnospermae	Gigantopteridales	China	Weining County, Guizhou Province	Chahe section, near Chahe Town	27.1688	105.379	Locality	Chahezhen	South China	China	250	90.428	21.37	South China	Xuanwei Formation		62 – 61	Changhsingian		Changhsingian	30-40°N	401	1	tropical_everwet		calculated	tropical_everwet
3592	257	158	793	Chu et al.	2016		Gigantonoclea		sp.							Gigantonoclea		sp.		incertae sedis	Gigantopteridales	Gymnospermae	Gigantopteridales	China	Weining County, Guizhou Province	Chahe section, near Chahe Town	27.1688	105.379	Locality	Chahezhen	South China	China	250	90.428	21.37	South China	Xuanwei Formation		60	Changhsingian		Changhsingian	30-40°N	401	1	tropical_everwet		calculated	tropical_everwet
3593	257	158	793	Chu et al.	2016		Gigantonoclea		sp.							Gigantonoclea		sp.		incertae sedis	Gigantopteridales	Gymnospermae	Gigantopteridales	China	Weining County, Guizhou Province	Chahe section, near Chahe Town	27.1688	105.379	Locality	Chahezhen	South China	China	250	90.428	21.37	South China	Xuanwei Formation		52 – 55	Changhsingian		Changhsingian	30-40°N	401	1	tropical_everwet		calculated	tropical_everwet
3594	257	158	793	Chu et al.	2016		Gigantonoclea		sp.							Gigantonoclea		sp.		incertae sedis	Gigantopteridales	Gymnospermae	Gigantopteridales	China	Weining County, Guizhou Province	Chahe section, near Chahe Town	27.1688	105.379	Locality	Chahezhen	South China	China	250	90.428	21.37	South China	Xuanwei Formation		37 – 38	Changhsingian		Changhsingian	30-40°N	401	1	tropical_everwet		calculated	tropical_everwet
3595	257	158	793	Chu et al.	2016		Gigantonoclea		sp.							Gigantonoclea		sp.		incertae sedis	Gigantopteridales	Gymnospermae	Gigantopteridales	China	Weining County, Guizhou Province	Chahe section, near Chahe Town	27.1688	105.379	Locality	Chahezhen	South China	China	250	90.428	21.37	South China	Xuanwei Formation		14 – 17	Changhsingian		Changhsingian	30-40°N	401	1	tropical_everwet		calculated	tropical_everwet
3596	257	158	793	Chu et al.	2016		Gigantonoclea		sp.							Gigantonoclea		sp.		incertae sedis	Gigantopteridales	Gymnospermae	Gigantopteridales	China	Weining County, Guizhou Province	Chahe section, near Chahe Town	27.1688	105.379	Locality	Chahezhen	South China	China	250	90.428	21.37	South China	Xuanwei Formation		6 – 7	Changhsingian		Changhsingian	30-40°N	401	1	tropical_everwet		calculated	tropical_everwet
3597	257	158	793	Chu et al.	2016		Gigantonoclea		sp.							Gigantonoclea		sp.		incertae sedis	Gigantopteridales	Gymnospermae	Gigantopteridales	China	Weining County, Guizhou Province	Chahe section, near Chahe Town	27.1688	105.379	Locality	Chahezhen	South China	China	250	90.428	21.37	South China	Xuanwei Formation		2 – 3	Changhsingian		Changhsingian	30-40°N	401	1	tropical_everwet		calculated	tropical_everwet
3599	249	51	788	Chu et al.	2016		Gigantopteris	dictyophylloides								Gigantopteris	dictyophylloides		Gu et Zhi, 1974	incertae sedis	Gigantopteridales	Gymnospermae	Gigantopteridales	China	Guizhou Province	Xiaohebian section, near Xiaohebian Village, Halahe Town	26.8233	103.997	City	Halahexiang	South China	China	250	89.479	20.447	South China	Kayitou Formation		7	Changhsingian		Changhsingian	30-40°N	28	0.477381	tropical_everwet	tropical_everwet	calculated	tropical_everwet
3600	249	51	789	Chu et al.	2016		Gigantopteris	dictyophylloides								Gigantopteris	dictyophylloides		Gu et Zhi, 1974	incertae sedis	Gigantopteridales	Gymnospermae	Gigantopteridales	China	Guizhou Province	Xiaohebian section, near Xiaohebian Village, Halahe Town	26.8233	103.997	City	Halahexiang	South China	China	250	89.479	20.447	South China	Xuanwei		3	Changhsingian		Changhsingian	30-40°N	28	0.477381	tropical_everwet	tropical_everwet	calculated	tropical_everwet
3601	1049	380	803	Chu et al.	2016		Gigantopteris	dictyophylloides								Gigantopteris	dictyophylloides		Gu et Zhi, 1974	incertae sedis	Gigantopteridales	Gymnospermae	Gigantopteridales	China	Guizhou Province	Jiucaichong section, near Jiucaichong Village, Heishitou Town	25.7987	104.687	Locality	Jiucaichong	South China	China	250	90.598	19.875	South China	Xuanwei Fomation		17	Changhsingian		Changhsingian	20-30°N	172	1	tropical_everwet		calculated	tropical_everwet
3602	386	124	797	Chu et al.	2016		Gigantopteris	dictyophylloides								Gigantopteris	dictyophylloides		Gu et Zhi, 1974	incertae sedis	Gigantopteridales	Gymnospermae	Gigantopteridales	China	Junlian County, Sichuan Province	Jinjibang section, near Jinji village, approx. 5 km southwest of Zhenzhou town	28.1639	104.511	Area	Junlian	South China	China	250	89.171	21.834	South China	Xuanwei Formation		22	Changhsingian		Changhsingian	30-40°N	220	1	tropical_everwet		calculated	tropical_everwet
3603	386	124	797	Chu et al.	2016		Gigantopteris	dictyophylloides								Gigantopteris	dictyophylloides		Gu et Zhi, 1974	incertae sedis	Gigantopteridales	Gymnospermae	Gigantopteridales	China	Junlian County, Sichuan Province	Jinjibang section, near Jinji village, approx. 5 km southwest of Zhenzhou town	28.1639	104.511	Area	Junlian	South China	China	250	89.171	21.834	South China	Xuanwei Formation		21	Changhsingian		Changhsingian	30-40°N	220	1	tropical_everwet		calculated	tropical_everwet
3604	386	124	797	Chu et al.	2016		Gigantopteris	dictyophylloides								Gigantopteris	dictyophylloides		Gu et Zhi, 1974	incertae sedis	Gigantopteridales	Gymnospermae	Gigantopteridales	China	Junlian County, Sichuan Province	Jinjibang section, near Jinji village, approx. 5 km southwest of Zhenzhou town	28.1639	104.511	Area	Junlian	South China	China	250	89.171	21.834	South China	Xuanwei Formation		19	Changhsingian		Changhsingian	30-40°N	220	1	tropical_everwet		calculated	tropical_everwet
3605	386	124	797	Chu et al.	2016		Gigantopteris	dictyophylloides								Gigantopteris	dictyophylloides		Gu et Zhi, 1974	incertae sedis	Gigantopteridales	Gymnospermae	Gigantopteridales	China	Junlian County, Sichuan Province	Jinjibang section, near Jinji village, approx. 5 km southwest of Zhenzhou town	28.1639	104.511	Area	Junlian	South China	China	250	89.171	21.834	South China	Xuanwei Formation		14	Changhsingian		Changhsingian	30-40°N	220	1	tropical_everwet		calculated	tropical_everwet
3606	386	124	797	Chu et al.	2016		Gigantopteris	dictyophylloides								Gigantopteris	dictyophylloides		Gu et Zhi, 1974	incertae sedis	Gigantopteridales	Gymnospermae	Gigantopteridales	China	Junlian County, Sichuan Province	Jinjibang section, near Jinji village, approx. 5 km southwest of Zhenzhou town	28.1639	104.511	Area	Junlian	South China	China	250	89.171	21.834	South China	Xuanwei Formation		13	Changhsingian		Changhsingian	30-40°N	220	1	tropical_everwet		calculated	tropical_everwet
3607	386	124	797	Chu et al.	2016		Gigantopteris	dictyophylloides								Gigantopteris	dictyophylloides		Gu et Zhi, 1974	incertae sedis	Gigantopteridales	Gymnospermae	Gigantopteridales	China	Junlian County, Sichuan Province	Jinjibang section, near Jinji village, approx. 5 km southwest of Zhenzhou town	28.1639	104.511	Area	Junlian	South China	China	250	89.171	21.834	South China	Xuanwei Formation		5	Changhsingian		Changhsingian	30-40°N	220	1	tropical_everwet		calculated	tropical_everwet
3608	254	55	790	Chu et al.	2016		Gigantopteris	dictyophylloides						Zhang et al. 2016		Gigantopteris	dictyophylloides		Gu et Zhi, 1974	incertae sedis	Gigantopteridales	Gymnospermae	Gigantopteridales	China	Leju County, Yunnan Province	Guanbachong section, Zhaotong City	24.4753	101.343	Region	Yunnan Province	South China	China	250	88.523	17.22	South China	Kayitou Formation			Changhsingian		Changhsingian	20-30°N	61	1	tropical_everwet		calculated	tropical_everwet
3609	254	55	791	Chu et al.	2016		Gigantopteris	dictyophylloides						Zhang et al. 2016		Gigantopteris	dictyophylloides		Gu et Zhi, 1974	incertae sedis	Gigantopteridales	Gymnospermae	Gigantopteridales	China	Leju County, Yunnan Province	Guanbachong section, Zhaotong City	24.4753	101.343	Region	Yunnan Province	South China	China	250	88.523	17.22	South China	Xuanwei Formation			Changhsingian		Changhsingian	20-30°N	61	1	tropical_everwet		calculated	tropical_everwet
3610	257	158	793	Chu et al.	2016		Gigantopteris	dictyophylloides								Gigantopteris	dictyophylloides		Gu et Zhi, 1974	incertae sedis	Gigantopteridales	Gymnospermae	Gigantopteridales	China	Weining County, Guizhou Province	Chahe section, near Chahe Town	27.1688	105.379	Locality	Chahezhen	South China	China	250	90.428	21.37	South China	Xuanwei Formation		65 – 63	Changhsingian		Changhsingian	30-40°N	401	1	tropical_everwet		calculated	tropical_everwet
3611	257	158	793	Chu et al.	2016		Gigantopteris	dictyophylloides								Gigantopteris	dictyophylloides		Gu et Zhi, 1974	incertae sedis	Gigantopteridales	Gymnospermae	Gigantopteridales	China	Weining County, Guizhou Province	Chahe section, near Chahe Town	27.1688	105.379	Locality	Chahezhen	South China	China	250	90.428	21.37	South China	Xuanwei Formation		60	Changhsingian		Changhsingian	30-40°N	401	1	tropical_everwet		calculated	tropical_everwet
3612	257	158	793	Chu et al.	2016		Gigantopteris	dictyophylloides								Gigantopteris	dictyophylloides		Gu et Zhi, 1974	incertae sedis	Gigantopteridales	Gymnospermae	Gigantopteridales	China	Weining County, Guizhou Province	Chahe section, near Chahe Town	27.1688	105.379	Locality	Chahezhen	South China	China	250	90.428	21.37	South China	Xuanwei Formation		37 – 38	Changhsingian		Changhsingian	30-40°N	401	1	tropical_everwet		calculated	tropical_everwet
3613	257	158	793	Chu et al.	2016		Gigantopteris	dictyophylloides								Gigantopteris	dictyophylloides		Gu et Zhi, 1974	incertae sedis	Gigantopteridales	Gymnospermae	Gigantopteridales	China	Weining County, Guizhou Province	Chahe section, near Chahe Town	27.1688	105.379	Locality	Chahezhen	South China	China	250	90.428	21.37	South China	Xuanwei Formation		6 – 7	Changhsingian		Changhsingian	30-40°N	401	1	tropical_everwet		calculated	tropical_everwet
3615	376	136	799	Chu et al.	2016		Gigantopteris	dictyrphylloides								Gigantopteris	dictyophylloides		Gu et Zhi, 1974	incertae sedis	Gigantopteridales	Gymnospermae	Gigantopteridales	China	Guizhou Province	Jinzhong section, 15 km south of Jinzhong Town	27.6193	105.344	Locality	Jinzhong	South China	China	250	90.153	21.741	South China	Xuanwei Formation		3	Changhsingian		Changhsingian	30-40°N	399	1	tropical_everwet		calculated	tropical_everwet
3616	255	133	792	Chu et al.	2016		Gigantopteris	dictyrphylloides								Gigantopteris	dictyophylloides		Gu et Zhi, 1974	incertae sedis	Gigantopteridales	Gymnospermae	Gigantopteridales	China	Panxian County, Guizhou Province	Wadu section, near Wadu village	25.71	104.472	Area	Panzhou	South China	China	250	90.468	19.7	South China	Xuanwei Formation		15	Changhsingian		Changhsingian	20-30°N	170	0.543824	tropical_everwet	tropical_everwet	calculated	tropical_everwet
3617	255	133	792	Chu et al.	2016		Gigantopteris	dictyrphylloides								Gigantopteris	dictyophylloides		Gu et Zhi, 1974	incertae sedis	Gigantopteridales	Gymnospermae	Gigantopteridales	China	Panxian County, Guizhou Province	Wadu section, near Wadu village	25.71	104.472	Area	Panzhou	South China	China	250	90.468	19.7	South China	Xuanwei Formation		14	Changhsingian		Changhsingian	20-30°N	170	0.543824	tropical_everwet	tropical_everwet	calculated	tropical_everwet
3618	255	133	792	Chu et al.	2016		Gigantopteris	dictyrphylloides								Gigantopteris	dictyophylloides		Gu et Zhi, 1974	incertae sedis	Gigantopteridales	Gymnospermae	Gigantopteridales	China	Panxian County, Guizhou Province	Wadu section, near Wadu village	25.71	104.472	Area	Panzhou	South China	China	250	90.468	19.7	South China	Xuanwei Formation		11	Changhsingian		Changhsingian	20-30°N	170	0.543824	tropical_everwet	tropical_everwet	calculated	tropical_everwet
3619	255	133	792	Chu et al.	2016		Gigantopteris	dictyrphylloides								Gigantopteris	dictyophylloides		Gu et Zhi, 1974	incertae sedis	Gigantopteridales	Gymnospermae	Gigantopteridales	China	Panxian County, Guizhou Province	Wadu section, near Wadu village	25.71	104.472	Area	Panzhou	South China	China	250	90.468	19.7	South China	Xuanwei Formation		5	Changhsingian		Changhsingian	20-30°N	170	0.543824	tropical_everwet	tropical_everwet	calculated	tropical_everwet
3620	255	133	792	Chu et al.	2016		Gigantopteris	dictyrphylloides								Gigantopteris	dictyophylloides		Gu et Zhi, 1974	incertae sedis	Gigantopteridales	Gymnospermae	Gigantopteridales	China	Panxian County, Guizhou Province	Wadu section, near Wadu village	25.71	104.472	Area	Panzhou	South China	China	250	90.468	19.7	South China	Xuanwei Formation		4	Changhsingian		Changhsingian	20-30°N	170	0.543824	tropical_everwet	tropical_everwet	calculated	tropical_everwet
3621	254	55	791	Chu et al.	2016		Gigantopteris	paradoxa						Zhang et al. 2016		Gigantopteris	paradoxa		Mo, 1980	incertae sedis	Gigantopteridales	Gymnospermae	Gigantopteridales	China	Leju County, Yunnan Province	Guanbachong section, Zhaotong City	24.4753	101.343	Region	Yunnan Province	South China	China	250	88.523	17.22	South China	Xuanwei Formation			Changhsingian		Changhsingian	20-30°N	61	1	tropical_everwet		calculated	tropical_everwet
3622	257	158	793	Chu et al.	2016		Gigantopteris	paradoxa								Gigantopteris	paradoxa		Mo, 1980	incertae sedis	Gigantopteridales	Gymnospermae	Gigantopteridales	China	Weining County, Guizhou Province	Chahe section, near Chahe Town	27.1688	105.379	Locality	Chahezhen	South China	China	250	90.428	21.37	South China	Xuanwei Formation		14 – 17	Changhsingian		Changhsingian	30-40°N	401	1	tropical_everwet		calculated	tropical_everwet
3623	257	158	793	Chu et al.	2016		Gigantopteris	paradoxa								Gigantopteris	paradoxa		Mo, 1980	incertae sedis	Gigantopteridales	Gymnospermae	Gigantopteridales	China	Weining County, Guizhou Province	Chahe section, near Chahe Town	27.1688	105.379	Locality	Chahezhen	South China	China	250	90.428	21.37	South China	Xuanwei Formation		6 – 7	Changhsingian		Changhsingian	30-40°N	401	1	tropical_everwet		calculated	tropical_everwet
3625	1049	380	803	Chu et al.	2016		Gigantopteris		sp.							Gigantopteris		sp.		incertae sedis	Gigantopteridales	Gymnospermae	Gigantopteridales	China	Guizhou Province	Jiucaichong section, near Jiucaichong Village, Heishitou Town	25.7987	104.687	Locality	Jiucaichong	South China	China	250	90.598	19.875	South China	Xuanwei Fomation		17	Changhsingian		Changhsingian	20-30°N	172	1	tropical_everwet		calculated	tropical_everwet
3627	376	136	799	Chu et al.	2016		Gigantopteris		sp.							Gigantopteris		sp.		incertae sedis	Gigantopteridales	Gymnospermae	Gigantopteridales	China	Guizhou Province	Jinzhong section, 15 km south of Jinzhong Town	27.6193	105.344	Locality	Jinzhong	South China	China	250	90.153	21.741	South China	Xuanwei Formation		3	Changhsingian		Changhsingian	30-40°N	399	1	tropical_everwet		calculated	tropical_everwet
3628	376	136	799	Chu et al.	2016		Gigantopteris		sp.							Gigantopteris		sp.		incertae sedis	Gigantopteridales	Gymnospermae	Gigantopteridales	China	Guizhou Province	Jinzhong section, 15 km south of Jinzhong Town	27.6193	105.344	Locality	Jinzhong	South China	China	250	90.153	21.741	South China	Xuanwei Formation		1	Changhsingian		Changhsingian	30-40°N	399	1	tropical_everwet		calculated	tropical_everwet
3630	386	124	797	Chu et al.	2016		Gigantopteris		sp.							Gigantopteris		sp.		incertae sedis	Gigantopteridales	Gymnospermae	Gigantopteridales	China	Junlian County, Sichuan Province	Jinjibang section, near Jinji village, approx. 5 km southwest of Zhenzhou town	28.1639	104.511	Area	Junlian	South China	China	250	89.171	21.834	South China	Xuanwei Formation		20	Changhsingian		Changhsingian	30-40°N	220	1	tropical_everwet		calculated	tropical_everwet
3631	386	124	797	Chu et al.	2016		Gigantopteris		sp.							Gigantopteris		sp.		incertae sedis	Gigantopteridales	Gymnospermae	Gigantopteridales	China	Junlian County, Sichuan Province	Jinjibang section, near Jinji village, approx. 5 km southwest of Zhenzhou town	28.1639	104.511	Area	Junlian	South China	China	250	89.171	21.834	South China	Xuanwei Formation		18	Changhsingian		Changhsingian	30-40°N	220	1	tropical_everwet		calculated	tropical_everwet
3632	386	124	797	Chu et al.	2016		Gigantopteris		sp.							Gigantopteris		sp.		incertae sedis	Gigantopteridales	Gymnospermae	Gigantopteridales	China	Junlian County, Sichuan Province	Jinjibang section, near Jinji village, approx. 5 km southwest of Zhenzhou town	28.1639	104.511	Area	Junlian	South China	China	250	89.171	21.834	South China	Xuanwei Formation		17	Changhsingian		Changhsingian	30-40°N	220	1	tropical_everwet		calculated	tropical_everwet
3633	386	124	797	Chu et al.	2016		Gigantopteris		sp.							Gigantopteris		sp.		incertae sedis	Gigantopteridales	Gymnospermae	Gigantopteridales	China	Junlian County, Sichuan Province	Jinjibang section, near Jinji village, approx. 5 km southwest of Zhenzhou town	28.1639	104.511	Area	Junlian	South China	China	250	89.171	21.834	South China	Xuanwei Formation		16	Changhsingian		Changhsingian	30-40°N	220	1	tropical_everwet		calculated	tropical_everwet
3634	386	124	797	Chu et al.	2016		Gigantopteris		sp.							Gigantopteris		sp.		incertae sedis	Gigantopteridales	Gymnospermae	Gigantopteridales	China	Junlian County, Sichuan Province	Jinjibang section, near Jinji village, approx. 5 km southwest of Zhenzhou town	28.1639	104.511	Area	Junlian	South China	China	250	89.171	21.834	South China	Xuanwei Formation		15	Changhsingian		Changhsingian	30-40°N	220	1	tropical_everwet		calculated	tropical_everwet
3635	386	124	797	Chu et al.	2016		Gigantopteris		sp.							Gigantopteris		sp.		incertae sedis	Gigantopteridales	Gymnospermae	Gigantopteridales	China	Junlian County, Sichuan Province	Jinjibang section, near Jinji village, approx. 5 km southwest of Zhenzhou town	28.1639	104.511	Area	Junlian	South China	China	250	89.171	21.834	South China	Xuanwei Formation		11	Changhsingian		Changhsingian	30-40°N	220	1	tropical_everwet		calculated	tropical_everwet
3636	255	133	792	Chu et al.	2016		Gigantopteris		sp.							Gigantopteris		sp.		incertae sedis	Gigantopteridales	Gymnospermae	Gigantopteridales	China	Panxian County, Guizhou Province	Wadu section, near Wadu village	25.71	104.472	Area	Panzhou	South China	China	250	90.468	19.7	South China	Xuanwei Formation		16	Changhsingian		Changhsingian	20-30°N	170	0.543824	tropical_everwet	tropical_everwet	calculated	tropical_everwet
3637	255	133	792	Chu et al.	2016		Gigantopteris		sp.							Gigantopteris		sp.		incertae sedis	Gigantopteridales	Gymnospermae	Gigantopteridales	China	Panxian County, Guizhou Province	Wadu section, near Wadu village	25.71	104.472	Area	Panzhou	South China	China	250	90.468	19.7	South China	Xuanwei Formation		15	Changhsingian		Changhsingian	20-30°N	170	0.543824	tropical_everwet	tropical_everwet	calculated	tropical_everwet
3638	255	133	792	Chu et al.	2016		Gigantopteris		sp.							Gigantopteris		sp.		incertae sedis	Gigantopteridales	Gymnospermae	Gigantopteridales	China	Panxian County, Guizhou Province	Wadu section, near Wadu village	25.71	104.472	Area	Panzhou	South China	China	250	90.468	19.7	South China	Xuanwei Formation		8	Changhsingian		Changhsingian	20-30°N	170	0.543824	tropical_everwet	tropical_everwet	calculated	tropical_everwet
3639	255	133	792	Chu et al.	2016		Gigantopteris		sp.							Gigantopteris		sp.		incertae sedis	Gigantopteridales	Gymnospermae	Gigantopteridales	China	Panxian County, Guizhou Province	Wadu section, near Wadu village	25.71	104.472	Area	Panzhou	South China	China	250	90.468	19.7	South China	Xuanwei Formation		4	Changhsingian		Changhsingian	20-30°N	170	0.543824	tropical_everwet	tropical_everwet	calculated	tropical_everwet
[truncated: 7,983 more rows]
